# Supplementary material for: Global analysis of contact-dependent human-to-mouse intercellular mRNA and lncRNA transfer in cell culture
Source: eLife. 2023 May 30;12:e83584. doi: 10.7554/eLife.83584 (PMC10259485; doi:10.7554/eLife.83584)
Supplement: Source data 1. [file elife-83584-data1.xlsx]

## Sheet: Read_Me
	List of supplementary tables in this file
	Number	Description
	1	List of total number of raw reads, reads passing cutadapt, reads aligning to hg38 and mm10 reference genomes of all samples, and the percentage of total reads in the different samples.
	2	List of all human mRNAs and lncRNAs annotated in the mouse-enriched samples, the RPMs in two replicates of Co-culture and Mix, Fold-Change (FC; Coculture divided by Mix) and Log2(fold-change).
	3	List of 283 statistically significant genes, the log2FC (from Table 2) and Q-values according to the FDR test.
	4	List of all genes from Table 2, their reads in mouse MEFs (Mouse_Coculture , Mouse_Mix) and in MCF7 cells (human_endogenous) and the corresponding calculations of average (avg_) RPM, FC, log2FC, and percent transfer and log10(% transfer). Condition 1 = yes, if both samples of Mouse_Coculture have RPM value >10; Condition 2 = yes, if both samples of human_endogenous have RPM value >100. Green colo…
	5	List of genes (ENSEMBL and GeneID) commonly annotated in this study and in Blumberg et al. BMC Biol. (2021), their percent transfer (from Table 4), and the stability ("half-life" in hours).
	6	List of 12 primate-specific genes, their expression in MCF7 only samples (Columns C-D, in RPM), ACTB expression (Columns E-F) is provided for comparison, and columns G-H provide the expression of each of the primate-specific genes relative to ACTB (% of ACTB). Columns J-O provide the data for those genes, as shown in Table 2.
	7	List of all human lncRNAs (column A) (from Human Genome Nomeclature Committee https://www.genenames.org/data/genegroup/#!/group/788 ); list of all lncRNAs detected by our RNA-seq in MCF7 cells (column C), and their expression and transfer data (from Table 4). Red color indicates the lncRNAs found in Table 3.
	8	Genes found to be overexpressed and/or mutated in breast cancer (Axelsen et al. PNAS 2007, Nik-Zainal et al. Nature 2016) and transferred genes in this study are listed. The common genes between the sets are indicated along with the corresponding percent of transfer.
	9	DESeq2 analysis of mouse-annotated (i.e. endogenous) genes in mouse-enriched samples from Co-culture and Mix. RPMs, BaseMean, p value, adjusted p value (padj) and Log2FC are indicated for each gene. DE? - are differentially expressed? Direction - up or down regulated.
	10	List of genes found to be differentially expressed in CAFs vs. MSCs (Yu et al, 2020) and in MEFs in Co-culture vs Mix (this study). The upregulated genes were then checked if they are also expressed in metastatic lung cancer CAFs (Pein et al. 2020).

## Sheet: Table 1
				Human mapping			Mouse mapping
	Sample name	total paired reads	passed CutAdapt	uniq mapped	% uniq mapped	paired, aligned to mouse	uniq mapped	% uniq mapped	paired, aligned to human	In final bam (stats)
	Cocul_1_human_enriched (MCF7)	173223002	172800477	157061514	0.908918	NA	2248725	0.0130134	1622435	890702
	Cocul_2_human_enriched	165486968	165068430	149952054	0.908424	NA	2379860	0.0144174	1600630	1054443
	Mix_1_human_enriched	180752612	180346023	163829950	0.90842	NA	2921013	0.0161967	1878033	1421941
	Mix_2_human_enriched	158895966	158494815	143843805	0.907562	NA	2485900	0.0156844	1470080	1305776
	Single culture_1_human_enriched	181339645	180875700	162700102	0.899513	NA	2573794	0.0142296	1774048	1083939
	Single culture_2_human_enriched	141986948	141655992	128497787	0.907112	NA	2010437	0.0141924	1338857	888930
	Cocul_1_mouse_enriched (MEF)	94426170	94215001	1608706	0.0170748	1048506	85652971	0.909122	NA	2630219
	Cocul_2_mouse_enriched	143695230	143344164	1991287	0.0138917	1645077	130398456	0.909688	NA	3882438
	Mix_1_mouse_enriched	281526515	280951895	3128332	0.0111348	2641145	257702593	0.917248	NA	5105018
	Mix_2_mouse_enriched	191238333	190790704	2203067	0.011547	1842859	174307773	0.913607	NA	4087676
	Single culture_1_mouse_enriched	147893237	147582310	1532155	0.0103817	1322269	135774731	0.919993	NA	2659272
	Single culture_2_mouse_enriched	163037944	162720620	1739678	0.0106912	1546467	149712066	0.920056	NA	2804998

## Sheet: Table 2
	Gene ID	Mouse_ Cocul_1 (RPM)	Mouse_Cocul_2 (RPM)	Mouse_Mix_1 (RPM)	Mouse_Mix_2 (RPM)	FC	log2FC
	EEF1A1	12684.8	6377.37	2515.18	3149.49	3.36509	1.75065
	MT-CO1	10371.7	7894.89	6584.45	7425.23	1.30386	0.382787
	MT-RNR2	8665.67	5861.2	5202.87	5409.71	1.36884	0.452949
	KRT8	6963.71	4307.29	1778.96	2233.2	2.80921	1.49016
	MT-ND4	6246.01	4621.3	4340.34	4852.37	1.18217	0.241432
	MT-CO2	4775.76	3412.41	3355.12	3880.51	1.13165	0.178422
	KRT18	4119.58	2548.52	1022.19	1296.08	2.87633	1.52423
	PABPC1	3902.22	2080.87	841.988	1072.22	3.12563	1.64415
	MT-CO3	3865.31	2950.14	2720.54	3010.54	1.18921	0.25
	EEF2	3408.03	1593	593.499	737.196	3.75821	1.91004
	CSDE1	3408.03	1845.02	748.548	959.513	3.07545	1.6208
	MT-ND5	3094.3	2361.19	2420.2	2806.75	1.04372	0.0617386
	MT-CYB	3092.25	2168.47	2145.53	2389.91	1.15991	0.214018
	ACTG1	2961.01	1975.75	841.988	1087.65	2.55838	1.35523
	ACTB	2956.91	2110.52	931.834	1176.43	2.40361	1.2652
	FLNA	2790.81	1661.73	737.253	954.882	2.63132	1.39579
	EIF4G2	2766.21	2339.63	984.202	1065.27	2.4913	1.3169
	RPLP0	2632.92	1371.97	570.395	688.565	3.18111	1.66953
	FTH1	2606.26	1784.37	791.161	956.425	2.5124	1.32907
	GAPDH	2546.8	2055.26	873.819	1051.37	2.39044	1.25728
	RPL8	2185.9	1280.33	539.591	658.459	2.89322	1.53268
	COL3A1	2175.65	707.549	264.918	279.44	5.2965	2.40504
	RPL13	2079.27	885.447	337.309	450.037	3.76546	1.91282
	PKM	2036.21	1626.69	713.636	908.566	2.25798	1.17503
	RPS2	1939.83	1184.64	495.438	633.757	2.76699	1.46832
	HNRNPA3	1929.58	1727.77	1225.5	1353.2	1.41829	0.504151
	MT-ATP6	1876.26	1475.74	1295.84	1468.22	1.21271	0.278238
	HNRNPA2B1	1808.6	1513.48	787.053	889.267	1.98177	0.986787
	HSP90AB1	1738.88	1216.98	526.756	678.529	2.45242	1.2942
	DDX3X	1701.97	1504.05	663.322	643.792	2.45274	1.29439
	DDX5	1673.26	1099.73	659.215	802.039	1.89768	0.924236
	GNAS	1636.35	824.8	317.286	424.563	3.31759	1.73013
	RPL13A	1624.04	916.444	361.439	412.984	3.28049	1.71391
	RPL7A	1619.94	828.843	361.439	440.774	3.05254	1.61001
	RPS3	1605.59	916.444	350.657	463.16	3.09902	1.63181
	RPL3	1597.39	742.589	287.508	375.16	3.53115	1.82014
	RPS18	1550.22	822.104	302.91	386.739	3.43991	1.78237
	MALAT1	1527.67	650.945	303.937	397.546	3.10573	1.63493
	RPL4	1527.67	943.398	367.086	466.248	2.96528	1.56817
	AHNAK	1511.26	719.678	346.036	361.265	3.15416	1.65726
	RPL10	1470.25	731.807	293.669	353.545	3.40237	1.76654
	TPT1	1425.14	663.074	288.021	318.808	3.44119	1.78291
	HSP90AA1	1423.09	1000	441.017	598.248	2.33154	1.22129
	HNRNPK	1412.84	1119.95	573.989	687.793	2.00731	1.00526
	MT-ND2	1396.43	1025.61	1101.26	1202.67	1.05126	0.072126
	CLTC	1390.28	818.061	342.956	432.283	2.8486	1.51025
	XBP1	1371.83	591.645	222.819	284.071	3.87356	1.95366
	MT-ND1	1353.37	1107.82	1075.07	1219.65	1.07254	0.101032
	HNRNPA1	1326.71	943.398	401.484	521.827	2.45866	1.29787
	RPL15	1306.21	661.726	281.861	318.037	3.28045	1.71389
	HNRNPU	1302.11	1037.74	561.668	618.319	1.98294	0.987643
	RPS6	1295.95	669.813	281.347	350.458	3.11135	1.63754
	EIF4B	1293.9	601.079	225.899	301.826	3.59085	1.84433
	HSPA8	1293.9	1130.73	473.361	633.757	2.19004	1.13096
	TFF1	1199.58	606.47	242.328	314.949	3.24085	1.69637
	RACK1	1181.12	660.379	253.11	269.405	3.52431	1.81734
	FTL	1168.82	1206.2	619.169	565.055	2.00555	1.004
	RPS8	1092.95	529.651	219.738	322.668	2.99148	1.58086
	RPL6	1080.65	592.993	246.435	328.072	2.91317	1.54259
	SRRM2	1078.6	530.998	223.846	269.405	3.26324	1.7063
	NPM1	1076.54	654.988	291.615	335.019	2.76323	1.46635
	ENO1	1031.43	908.358	444.611	490.178	2.07511	1.05319
	TRIM37	1000.67	444.745	162.237	226.948	3.71396	1.89296
	RPL32	998.623	439.354	187.907	246.247	3.31214	1.72776
	RPL30	998.623	529.651	212.037	269.405	3.17437	1.66647
	RPS3A	990.421	477.09	206.39	242.387	3.27002	1.7093
	HNRNPH1	984.27	688.681	512.38	501.757	1.64963	0.722142
	RPLP1	982.219	659.031	262.351	328.072	2.77979	1.47497
	EIF1	974.017	836.929	482.603	521.827	1.80296	0.850367
	RPS14	971.966	632.077	236.167	315.721	2.90646	1.53927
	UBE2D3	971.966	811.322	400.971	382.879	2.27504	1.18589
	TUBA1B	953.511	854.449	422.534	487.09	1.98759	0.991021
	SLC7A5	949.41	669.813	296.236	356.633	2.48016	1.31044
	YWHAZ	945.309	619.947	275.186	338.879	2.54901	1.34994
	PPIA	943.258	614.556	273.646	345.054	2.51788	1.33221
	PSMD6	941.208	505.392	240.788	289.475	2.72808	1.44789
	TMSB4X	937.107	526.955	240.788	304.914	2.6829	1.42379
	YBX1	933.005	707.549	302.397	402.177	2.32843	1.21936
	RPL37	916.601	438.006	176.099	220.773	3.41321	1.77113
	H3-3B	896.095	469.004	230.52	260.913	2.77779	1.47394
	PTMA	871.489	536.389	209.984	265.545	2.96066	1.56592
	NQO1	869.438	611.861	280.834	324.212	2.44824	1.29175
	ANXA2	865.337	812.67	361.952	391.37	2.22748	1.15541
	RPL7	857.135	563.343	214.091	289.475	2.82084	1.49612
	RPS19	857.135	532.346	227.953	274.808	2.7637	1.4666
	ATP5F1B	857.135	553.909	241.815	304.914	2.58089	1.36787
	AARS1	853.034	363.882	139.647	176.001	3.8553	1.94684
	STC2	840.73	339.623	113.976	168.281	4.18183	2.06413
	GATA3	840.73	376.012	141.187	198.387	3.58314	1.84123
	RPS5	836.629	424.529	197.148	220.001	3.02328	1.59611
	MT-RNR1	828.427	475.742	421.507	551.16	1.34082	0.423112
	SCD	822.275	501.349	234.627	248.563	2.73935	1.45383
	RPL18A	816.123	396.227	147.861	186.808	3.62254	1.857
	TMBIM6	814.073	464.961	211.01	240.843	2.83064	1.50113
	HUWE1	809.972	439.354	231.547	255.51	2.56505	1.35899
	RPS16	809.972	510.783	235.654	308.001	2.4294	1.2806
	EIF5	801.77	865.231	434.343	419.932	1.95136	0.964483
	RPL10A	799.719	323.451	130.919	158.246	3.88418	1.95761
	RPS23	777.163	396.227	172.505	206.878	3.09289	1.62896
	RPL12	773.062	467.656	167.371	194.527	3.42836	1.77752
	NUCKS1	771.011	377.359	165.317	193.755	3.19816	1.67724
	RPL41	758.708	402.966	182.773	192.211	3.09793	1.6313
	HDLBP	758.708	402.966	181.233	216.141	2.92338	1.54763
	NCL	758.708	580.864	262.351	308.001	2.34867	1.23185
	RPL11	756.657	381.402	157.103	199.159	3.19445	1.67557
	RPS11	756.657	412.4	195.095	227.72	2.76494	1.46725
	RPS25	744.354	402.966	146.321	206.106	3.25548	1.70287
	SLC25A5	742.303	471.699	196.122	277.124	2.56527	1.35911
	G6PD	736.152	698.115	336.282	399.861	1.94835	0.962254
	HSPD1	732.05	501.349	221.792	302.598	2.35207	1.23393
	CCND1	721.798	392.184	158.643	231.58	2.85473	1.51336
	RPSA	721.798	501.349	196.635	281.756	2.55679	1.35434
	MT-ND4L	711.545	556.605	515.461	540.353	1.20111	0.264369
	EIF4A2	705.393	483.828	191.501	205.334	2.99676	1.58341
	HMGB1	701.292	552.562	354.251	423.019	1.61315	0.689881
	HSPB1	699.241	351.753	127.325	147.439	3.82508	1.93549
	PPP3CA	697.191	309.974	110.896	164.422	3.65819	1.87113
	NCOA3	695.14	343.666	124.758	147.439	3.81638	1.9322
	PSAP	684.888	475.742	177.125	212.282	2.9805	1.57556
	RPL23A	680.786	398.923	158.129	222.317	2.83801	1.50488
	FASN	672.584	416.443	182.773	215.369	2.73527	1.45168
	RPS24	668.483	343.666	177.125	182.948	2.81095	1.49106
	RPL14	662.331	370.621	158.129	181.404	3.04227	1.60515
	PRDX1	658.23	458.222	224.359	266.317	2.27534	1.18608
	TPI1	647.977	487.872	235.141	274.036	2.23076	1.15753
	APLP2	641.826	297.844	140.674	160.562	3.11938	1.64126
	RPS4X	641.826	369.273	145.294	181.404	3.0949	1.62989
	XPOT	637.725	283.019	113.463	115.018	4.02985	2.01073
	RPL5	637.725	328.842	148.375	145.895	3.28462	1.71573
	RPS27A	637.725	346.362	152.482	189.124	2.88077	1.52645
	NUMA1	635.674	250.674	87.2792	110.386	4.48408	2.16481
	CANX	635.674	407.009	142.727	196.843	3.0706	1.61852
	EIF4G1	631.573	421.834	201.769	272.492	2.22115	1.15131
	SPTSSB	627.472	336.928	138.107	205.334	2.80805	1.48957
	RPL18	627.472	340.971	145.294	210.738	2.7201	1.44366
	RPL37A	623.371	436.659	166.857	208.422	2.82464	1.49807
	ATP1A1	623.371	370.621	167.371	202.247	2.68924	1.4272
	TPM4	621.32	389.489	152.995	203.018	2.83924	1.5055
	SET	621.32	330.189	162.237	196.071	2.65556	1.40902
	MT-ND3	621.32	384.098	374.787	403.721	1.29147	0.369011
	P4HB	619.27	382.75	153.509	191.439	2.90484	1.53846
	MAT2A	613.118	433.963	198.175	229.264	2.44966	1.29258
	RPS7	611.067	404.313	157.103	191.439	2.91322	1.54262
	SLC38A1	609.017	264.151	105.762	116.562	3.92746	1.9736
	RAN	606.966	490.567	204.336	240.071	2.46966	1.30431
	DSCAM-AS1	600.815	202.157	79.5781	76.4214	5.14727	2.36381
	CFL1	600.815	448.788	180.206	242.387	2.48372	1.3125
	EIF3B	592.612	299.192	132.972	216.141	2.55448	1.35303
	ACTN4	592.612	396.227	209.984	231.58	2.2394	1.16312
	RPL19	590.562	462.265	186.367	202.247	2.70919	1.43786
	RPS12	582.359	359.839	128.865	176.001	3.09053	1.62786
	ALDH1A1	582.359	725.069	388.649	350.458	1.76893	0.822877
	RPL28	580.309	327.494	119.11	174.457	3.09231	1.62869
	CALR	580.309	351.753	139.647	166.738	3.04213	1.60508
	CDH1	578.258	270.89	122.191	149.755	3.12249	1.6427
	KRT19	576.208	324.799	127.325	164.422	3.08832	1.62682
	HSP90B1	572.107	374.664	161.723	209.194	2.55251	1.35192
	PTPRF	555.702	265.499	104.735	104.983	3.91574	1.96929
	MATR3	553.652	388.141	244.382	243.159	1.93172	0.949886
	SYTL2	551.601	269.542	106.275	155.159	3.14092	1.65119
	CNBP	549.55	388.141	150.428	177.545	2.85905	1.51554
	SLC25A3	549.55	315.365	150.942	198.387	2.47594	1.30797
	RPS9	547.5	300.54	132.972	144.352	3.05794	1.61256
	PREX1	545.449	225.068	75.4709	90.3162	4.64763	2.2165
	ESR1	543.399	180.593	89.3329	90.3162	4.03004	2.01079
	NONO	543.399	280.324	136.566	157.474	2.80139	1.48614
	RPS6KB1	539.298	289.758	162.75	175.229	2.45298	1.29454
	RPL24	535.197	254.717	101.655	132.773	3.36955	1.75256
	PFN1	533.146	444.745	234.114	266.317	1.9541	0.966503
	H2AZ1	531.095	423.181	183.8	247.019	2.21503	1.14733
	HIPK1	529.045	260.108	105.762	131.229	3.32989	1.73548
	EIF3A	529.045	277.629	122.704	140.492	3.06491	1.61585
	NAP1L1	529.045	297.844	126.298	143.58	3.06394	1.61539
	MYL12B	524.944	274.933	133.486	169.825	2.63715	1.39898
	SLC9A3R1	522.893	231.806	91.3865	141.264	3.24392	1.69774
	SNRNP200	518.792	269.542	124.245	130.457	3.09513	1.63
	DYNC1H1	518.792	234.502	110.896	151.299	2.87303	1.52257
	SLC3A2	518.792	330.189	148.888	171.369	2.65094	1.4065
	TXNRD1	514.691	454.179	233.087	257.054	1.97672	0.983107
	UBA1	512.64	266.847	119.11	144.352	2.95863	1.56493
	RPL29	508.539	254.717	110.383	151.299	2.91674	1.54436
	IGFBP4	506.489	386.793	177.125	182.948	2.48083	1.31082
	CTTN	504.438	291.106	120.651	173.685	2.70285	1.43448
	SLC38A2	502.388	216.982	96.5206	98.8075	3.68288	1.88083
	HNRNPUL1	502.388	281.672	110.896	142.036	3.09989	1.63221
	APP	500.337	327.494	127.838	124.281	3.28348	1.71523
	SERBP1	500.337	254.717	131.432	162.106	2.57225	1.36303
	GANAB	498.286	249.327	109.869	133.544	3.07137	1.61888
	RPL27A	498.286	268.195	112.95	151.299	2.90061	1.53635
	EIF3E	494.185	235.85	91.8999	113.474	3.55466	1.82971
	HDGF	492.135	289.758	129.892	165.194	2.64971	1.40584
	SF3B3	490.084	280.324	118.084	167.51	2.69757	1.43166
	MYOF	483.933	293.801	120.137	152.843	2.84905	1.51048
	RPS27	479.831	245.284	108.329	148.211	2.82652	1.49903
	CLU	479.831	295.149	136.566	156.702	2.64256	1.40194
	SYNCRIP	479.831	309.974	157.103	184.492	2.31211	1.20921
	HNRNPC	477.781	338.276	133.999	169.053	2.69279	1.4291
	RPL21	473.68	288.41	111.409	138.948	3.04401	1.60597
	MYH9	473.68	335.58	120.651	163.65	2.84649	1.50919
	TKT	473.68	349.057	188.934	204.562	2.09084	1.06408
	SARS1	469.579	198.114	68.7966	71.0179	4.77556	2.25567
	KPNB1	469.579	397.575	157.103	212.282	2.34756	1.23116
	USP32	467.528	211.591	81.6318	115.018	3.45344	1.78804
	BTF3	467.528	274.933	111.409	115.018	3.27902	1.71327
	FLNB	467.528	277.629	128.352	148.983	2.68685	1.42591
	HSPA9	467.528	314.017	141.7	176.001	2.46	1.29866
	RPL31	461.376	300.54	111.923	138.948	3.03709	1.60269
	MRFAP1	457.275	269.542	113.976	142.808	2.83046	1.50104
	PLEC	457.275	357.144	153.509	169.825	2.51882	1.33275
	DSTN	455.225	266.847	128.865	139.72	2.68843	1.42676
	TRIM28	455.225	378.707	176.099	206.878	2.1775	1.12267
	CNOT1	453.174	195.418	94.9803	112.702	3.123	1.64293
	LDHA	453.174	412.4	221.279	225.405	1.93778	0.954405
	GAS5	451.124	136.119	60.0686	77.9653	4.25433	2.08893
	ZFP36L2	449.073	198.114	73.4172	90.3162	3.95268	1.98283
	HMGN1	449.073	188.68	96.5206	97.2636	3.29105	1.71855
	UBC	449.073	270.89	116.543	142.808	2.77602	1.47302
	ILF3	449.073	297.844	129.379	161.334	2.56926	1.36135
	TUBA1C	444.972	365.23	165.831	228.492	2.05467	1.0389
	NEAT1	442.921	168.464	62.1223	82.5969	4.22463	2.07883
	STARD10	442.921	230.459	87.7926	142.808	2.92012	1.54603
	CERS2	440.871	208.895	94.9803	119.65	3.02738	1.59807
	RPL23	440.871	299.192	111.409	136.632	2.98362	1.57707
	CD63	440.871	283.019	117.57	148.211	2.72363	1.44553
	PRKDC	438.82	265.499	124.245	121.194	2.86964	1.52087
	DDB1	438.82	254.717	117.057	142.036	2.67679	1.42051
	HNRNPD	438.82	339.623	182.773	258.598	1.7637	0.818602
	HNRNPM	434.719	339.623	137.08	155.159	2.64969	1.40583
	RBMX	430.618	250.674	112.436	124.281	2.87808	1.52511
	FUS	428.567	225.068	118.597	115.79	2.7887	1.47959
	HSPA5	426.517	283.019	115.517	145.895	2.71424	1.44055
	ATP2A2	426.517	331.537	156.076	165.194	2.35956	1.23852
	EWSR1	426.517	256.065	134.513	167.51	2.26004	1.17635
	CD47	424.466	152.291	58.015	73.3337	4.39104	2.13456
	AGR2	424.466	225.068	87.7926	135.86	2.90421	1.53814
	RPL39	424.466	211.591	106.275	127.369	2.72233	1.44484
	SRSF10	424.466	365.23	207.93	202.247	1.92526	0.945053
	PTGES3	422.416	268.195	112.95	166.738	2.46922	1.30406
	PRPF8	418.315	245.284	109.869	136.632	2.69207	1.42871
	LARP1	416.264	210.243	78.0379	128.141	3.03866	1.60343
	MTDH	416.264	253.37	116.03	113.474	2.91774	1.54485
	FHL1	412.163	385.446	101.655	90.3162	4.15484	2.05479
	CDV3	412.163	175.203	71.3636	100.351	3.42058	1.77424
	RPL35	412.163	238.545	98.5742	125.825	2.89978	1.53594
	RHOA	412.163	295.149	124.758	159.79	2.48574	1.31367
	EIF2S3	410.112	198.114	86.7658	99.5794	3.26397	1.70663
	CALM1	410.112	283.019	125.271	166.738	2.37367	1.24712
	APPBP2	408.062	206.2	85.739	116.562	3.03638	1.60235
	PIEZO1	408.062	188.68	85.739	120.422	2.89455	1.53334
	HMGN2	408.062	192.723	106.275	124.281	2.6058	1.38173
	MYL6	408.062	237.197	109.869	141.264	2.56939	1.36143
	RAC1	403.961	250.674	83.172	100.351	3.56704	1.83473
	KIAA0100	403.961	216.982	86.7658	99.5794	3.33221	1.73648
	RPS15	403.961	254.717	99.601	118.878	3.01484	1.59208
	RPS13	401.91	192.723	94.4669	108.071	2.93591	1.55381
	RAB7A	401.91	212.938	97.5474	117.334	2.86134	1.51669
	HNRNPF	401.91	254.717	101.141	132.773	2.80714	1.4891
	CCT3	401.91	262.804	120.137	145.895	2.49862	1.32113
	KIF1C	399.859	334.232	71.877	71.7898	5.10968	2.35323
	KPNA2	399.859	264.151	109.356	129.685	2.77782	1.47395
	GSE1	397.809	176.55	73.9306	118.106	2.99089	1.58057
	YWHAB	397.809	211.591	90.3597	121.965	2.87012	1.52111
	KRT80	397.809	246.631	92.4133	132.773	2.86181	1.51693
	CAPRIN1	397.809	283.019	159.156	194.527	1.92497	0.944832
	CDC42BPB	395.758	194.07	78.5513	94.1759	3.4148	1.7718
	NRAS	395.758	202.157	85.2256	96.4917	3.29036	1.71825
	EIF4H	395.758	237.197	104.735	118.878	2.83059	1.5011
	CELF1	393.708	230.459	136.053	134.316	2.30857	1.207
	FAM120A	389.607	199.461	82.6586	99.5794	3.23241	1.69261
	PAPOLA	389.607	252.022	102.168	148.211	2.56263	1.35762
	DDX17	387.556	152.291	69.31	96.4917	3.25598	1.70309
	VCP	385.506	304.583	133.999	156.702	2.37387	1.24724
	CENPB	383.455	278.976	84.1988	98.8075	3.61972	1.85588
	IARS1	383.455	156.335	74.4441	97.2636	3.14365	1.65244
	PGK1	383.455	273.585	125.785	138.176	2.48916	1.31566
	IFI6	381.404	141.51	56.9882	56.3511	4.6137	2.20593
	HNRNPH3	381.404	204.852	139.133	183.72	1.81586	0.860653
	ADAR	379.354	183.289	78.0379	91.0881	3.32677	1.73412
	PUM2	379.354	245.284	127.838	140.492	2.32787	1.21901
	PTPN11	375.253	196.766	72.3904	96.4917	3.38709	1.76005
	ANKRD11	371.152	207.548	70.8502	94.9478	3.49039	1.80339
	MSI2	371.152	206.2	78.0379	91.0881	3.41374	1.77135
	MARS1	371.152	157.682	73.4172	87.2285	3.29193	1.71893
	RPL35A	367.051	163.073	77.5245	101.123	2.96742	1.56921
	SFPQ	367.051	180.593	94.9803	102.667	2.77081	1.47031
	PCBP2	365	179.246	80.0915	104.983	2.94068	1.55615
	PGD	365	315.365	145.294	133.544	2.43999	1.28688
	EEF1B2	362.949	187.332	96.5206	115.79	2.59187	1.37399
	KRT7	362.949	524.26	277.753	238.527	1.71846	0.781119
	MTATP6P1	362.949	280.324	241.301	261.685	1.27891	0.354912
	UBR5	360.899	163.073	59.5552	77.9653	3.81014	1.92984
	ZNF664	360.899	156.335	71.877	82.5969	3.34835	1.74345
	AP2M1	360.899	190.027	99.0876	110.386	2.63004	1.39509
	HNRNPAB	360.899	250.674	118.597	155.159	2.23401	1.15964
	CCT7	360.899	250.674	128.865	147.439	2.2134	1.14627
	ANP32B	358.848	222.372	69.8234	95.7197	3.51099	1.81188
	TOP2B	358.848	238.545	82.6586	91.0881	3.4383	1.7817
	SEPTIN9	358.848	218.329	97.5474	108.071	2.80704	1.48905
	QKI	358.848	380.055	141.7	162.878	2.42599	1.27857
	GRN	356.798	164.421	56.4748	64.8424	4.29633	2.1031
	RPS29	356.798	167.116	76.4977	84.9127	3.24585	1.6986
	PRRC2A	356.798	237.197	110.896	106.527	2.73198	1.44995
	ITGB1	356.798	257.413	136.053	169.825	2.00802	1.00578
	MCM7	354.747	264.151	92.4133	166.738	2.38818	1.25591
	PPT1	352.697	184.636	73.4172	79.5091	3.51367	1.81298
	ATP5MC2	352.697	107.817	71.3636	85.6846	2.93231	1.55204
	CCNI	350.646	153.639	64.6893	75.6495	3.59334	1.84533
	DSP	350.646	160.378	64.6893	81.8249	3.48788	1.80235
	MAZ	350.646	258.761	106.789	121.965	2.66402	1.41361
	HNRNPR	350.646	252.022	141.7	132.001	2.20192	1.13876
	MAL2	346.545	142.857	58.5284	75.6495	3.64741	1.86687
	BCAS3	346.545	149.596	71.3636	72.5617	3.44721	1.78543
	PNN	346.545	243.936	114.49	125.825	2.45711	1.29696
	SQSTM1	346.545	301.887	141.187	148.211	2.24062	1.1639
	PLXNB2	344.494	173.855	58.5284	74.1056	3.90812	1.96647
	STAT1	344.494	187.332	74.9575	71.7898	3.6241	1.85762
	SLC1A5	344.494	223.72	86.2524	108.071	2.92407	1.54798
	RPLP2	344.494	172.507	77.0111	108.843	2.78177	1.476
	PPP1CC	344.494	235.85	165.831	180.632	1.67505	0.744207
	CTNNA1	342.444	238.545	96.0072	108.843	2.83617	1.50394
	RPS21	342.444	183.289	84.1988	118.106	2.59872	1.3778
	MBTPS1	340.393	183.289	65.7161	81.8249	3.5494	1.82757
	CD164	340.393	161.725	69.8234	74.8775	3.47004	1.79495
	TSKU	340.393	212.938	82.1452	90.3162	3.20844	1.68187
	TRAF7	340.393	188.68	75.9843	95.7197	3.08131	1.62354
	LAPTM4B	340.393	173.855	82.1452	85.6846	3.06411	1.61547
	UBB	338.343	200.809	103.195	115.79	2.46205	1.29986
	PRRC2C	336.292	145.553	59.0418	68.7021	3.77196	1.91531
	PPP2R1A	336.292	216.982	90.3597	108.071	2.78825	1.47936
	MTHFD2	334.242	169.812	52.8809	54.0353	4.71447	2.23709
	NMD3	334.242	171.159	57.5016	83.3688	3.5877	1.84306
	OGT	334.242	153.639	62.1223	87.2285	3.26668	1.70782
	ARPP19	334.242	172.507	74.9575	105.755	2.80417	1.48758
	NORAD	332.191	203.504	70.8502	81.8249	3.50873	1.81095
	LRATD2	332.191	156.335	54.4212	86.4565	3.46773	1.79399
	MCL1	332.191	177.898	68.2832	92.632	3.16992	1.66445
	SF3B1	332.191	202.157	79.0647	93.4039	3.09823	1.63144
	AGRN	332.191	167.116	74.9575	93.4039	2.96569	1.56837
	SPINT2	332.191	199.461	73.4172	106.527	2.95454	1.56293
	BZW1	332.191	210.243	92.9267	101.123	2.79533	1.48302
	FMR1	332.191	314.017	168.911	177.545	1.8652	0.899327
	MED13	330.14	148.248	49.8005	60.2108	4.34854	2.12053
	SMARCD2	330.14	153.639	61.6089	88.0004	3.23362	1.69315
	EZR	330.14	215.634	78.5513	111.93	2.86523	1.51865
	GSPT1	330.14	216.982	82.1452	121.965	2.68052	1.42251
	TMED10	328.09	164.421	63.1491	94.1759	3.13053	1.64641
	RPS20	328.09	245.284	93.9535	118.878	2.69403	1.42976
	VMP1	328.09	225.068	89.8463	117.334	2.66994	1.41681
	PRRC2B	328.09	148.248	88.8195	106.527	2.43843	1.28595
	RCC2	326.039	184.636	58.5284	75.6495	3.80596	1.92826
	MORF4L1	326.039	136.119	66.2295	78.7372	3.18803	1.67266
	MKI67	326.039	187.332	92.4133	79.5091	2.98606	1.57824
	IRAK1	326.039	198.114	98.5742	132.001	2.27324	1.18475
	CCT2	326.039	234.502	110.383	144.352	2.2005	1.13783
	TACSTD2	323.989	164.421	51.8541	72.5617	3.92562	1.97292
	TOP2A	323.989	190.027	80.0915	71.0179	3.40162	1.76622
	SETD5	323.989	207.548	113.976	117.334	2.29794	1.20034
	NPNT	321.938	145.553	47.7469	70.2459	3.96203	1.98624
	SULF2	321.938	163.073	64.6893	78.7372	3.3816	1.75771
	SRSF3	321.938	250.674	110.383	118.878	2.49765	1.32057
	AKR1B10	321.938	470.351	210.497	200.703	1.92678	0.946189
	ATP5F1A	319.888	192.723	90.8731	111.158	2.53728	1.34328
	DAZAP2	315.786	134.771	78.0379	77.1933	2.90249	1.53729
	LRPPRC	313.736	173.855	71.3636	88.7723	3.04486	1.60637
	RSL1D1	313.736	154.987	70.3368	87.2285	2.97478	1.57279
	ERGIC1	313.736	175.203	78.0379	86.4565	2.97237	1.57161
	SRSF2	313.736	230.459	107.302	149.755	2.11702	1.08203
	ZNF217	311.685	165.769	45.6932	68.7021	4.17372	2.06133
	ATF4	311.685	154.987	46.2067	74.8775	3.85411	1.9464
	CA12	311.685	225.068	106.275	98.0355	2.62714	1.39349
	XRCC5	311.685	230.459	96.5206	117.334	2.53511	1.34205
	DHCR24	311.685	210.243	90.3597	136.632	2.29933	1.20121
	KTN1	309.635	175.203	78.0379	91.8601	2.8537	1.51283
	CALM2	309.635	250.674	100.628	106.527	2.70479	1.43552
	YWHAQ	309.635	241.24	95.4937	139.72	2.34202	1.22775
	TRIM33	307.584	130.728	51.8541	60.9827	3.88448	1.95772
	KIAA1522	307.584	145.553	63.1491	64.8424	3.54037	1.8239
	HECTD1	307.584	176.55	67.2563	87.2285	3.13386	1.64794
	PCBP1	307.584	266.847	91.8999	97.2636	3.03669	1.6025
	SF3B2	307.584	214.286	86.2524	108.843	2.67495	1.41951
	LMNA	307.584	200.809	102.168	105.755	2.4451	1.2899
	PSMD2	307.584	214.286	101.141	121.194	2.34723	1.23096
	BCL9L	305.534	210.243	82.1452	106.527	2.73372	1.45087
	EEF1A2	305.534	185.984	71.3636	110.386	2.70436	1.43529
	GCN1	305.534	185.984	83.6854	126.597	2.33742	1.22492
	EIF5A	305.534	315.365	130.919	143.58	2.26194	1.17756
	SHMT2	303.483	99.7307	44.153	59.4389	3.89233	1.96063
	IQGAP1	303.483	160.378	71.3636	78.7372	3.09033	1.62776
	NACA	303.483	164.421	72.9038	94.9478	2.7876	1.47903
	BSG	303.483	208.895	84.1988	103.439	2.73068	1.44926
	PRDX6	303.483	171.159	82.6586	98.8075	2.6156	1.38714
	TUG1	301.433	157.682	58.5284	68.7021	3.60853	1.85141
	GNS	299.382	103.774	53.3944	70.2459	3.26072	1.70519
	DDR1	299.382	133.423	51.8541	85.6846	3.14679	1.65388
	SEPTIN2	299.382	184.636	88.306	85.6846	2.78186	1.47605
	RPL27	299.382	196.766	87.2792	125.053	2.33666	1.22445
	GSTM3	297.331	107.817	46.7201	67.9301	3.53378	1.82121
	PTP4A2	297.331	191.375	64.6893	91.0881	3.13721	1.64948
	SEC61A1	297.331	203.504	96.0072	145.123	2.07703	1.05452
	RPL9	295.281	172.507	60.0686	74.1056	3.48642	1.80175
	DYNLL2	295.281	191.375	70.8502	94.1759	2.94896	1.56021
	FKBP4	295.281	204.852	95.4937	109.615	2.43839	1.28593
	RBM39	295.281	177.898	97.034	118.878	2.19154	1.13194
	TMSB10	295.281	230.459	122.191	142.036	1.98973	0.992572
	ERBB3	293.23	109.165	45.6932	46.316	4.37342	2.12876
	MORF4L2	293.23	185.984	64.1759	92.632	3.05606	1.61167
	DKK1	293.23	165.769	68.2832	86.4565	2.96626	1.56865
	SRSF9	293.23	172.507	72.9038	110.386	2.54098	1.34539
	AKR1C2	293.23	324.799	187.394	172.913	1.71529	0.778449
	TOB1	291.18	109.165	49.8005	40.9125	4.41331	2.14186
	RHOB	291.18	138.814	46.7201	53.2634	4.30065	2.10456
	EIF3H	291.18	134.771	58.5284	57.1231	3.68306	1.8809
	RNPS1	291.18	185.984	76.4977	76.4214	3.12037	1.64172
	DDX21	291.18	202.157	86.7658	88.0004	2.82284	1.49715
	PRKCSH	291.18	160.378	73.9306	87.2285	2.80194	1.48642
	PEBP1	291.18	183.289	74.9575	98.0355	2.7427	1.4556
	MT-ATP8	291.18	196.766	166.857	200.703	1.32753	0.408741
	ARHGEF12	289.129	136.119	66.7429	73.3337	3.03582	1.60209
	NUP210	289.129	153.639	65.7161	84.1407	2.95461	1.56297
	KARS1	289.129	161.725	68.7966	84.9127	2.93317	1.55246
	RPN2	289.129	187.332	74.4441	99.5794	2.73791	1.45308
	BMP7	289.129	191.375	93.9535	129.685	2.14858	1.10338
	PPDPF	287.079	126.685	59.0418	61.7547	3.42529	1.77623
	IPO7	287.079	185.984	75.4709	74.8775	3.14644	1.65372
	SERF2	287.079	171.159	67.2563	81.8249	3.07375	1.62
	RPL38	287.079	181.941	79.0647	84.1407	2.8738	1.52296
	PTBP1	287.079	229.111	90.8731	101.123	2.68854	1.42682
	HMGA1	287.079	184.636	73.4172	106.527	2.62145	1.39037
	USP34	287.079	190.027	83.172	115.018	2.40732	1.26743
	MYC	285.028	101.078	36.4519	44.0002	4.79921	2.2628
	FOXA1	285.028	111.86	43.1262	53.2634	4.11754	2.04178
	CD9	285.028	129.38	45.1798	63.2985	3.82019	1.93365
	NOTCH2	285.028	138.814	52.3675	68.7021	3.50082	1.80769
	EEF1D	285.028	214.286	61.0955	91.0881	3.281	1.71414
	APH1A	285.028	154.987	67.2563	81.053	2.96687	1.56894
	ENSA	285.028	173.855	69.8234	106.527	2.60211	1.37968
	TTC3	282.977	111.86	41.0726	55.5792	4.08516	2.03039
	SMARCA4	282.977	115.903	47.2335	62.5266	3.63411	1.8616
	NUDT21	282.977	145.553	55.448	77.9653	3.21205	1.6835
	ABAT	282.977	150.944	55.9614	81.053	3.16698	1.66311
	NCOR2	282.977	157.682	61.6089	82.5969	3.05577	1.61154
	RAB1B	282.977	191.375	64.1759	91.8601	3.04002	1.60408
	S100A11	282.977	210.243	75.9843	90.3162	2.96584	1.56844
	S100A10	282.977	233.154	109.356	121.194	2.2387	1.16266
	SMG1	280.927	126.685	55.448	59.4389	3.54794	1.82698
	L1CAM	280.927	167.116	59.5552	88.7723	3.02063	1.59485
	TNRC18	280.927	130.728	67.7698	70.2459	2.98267	1.5766
	SNHG29	280.927	176.55	77.5245	90.3162	2.72566	1.44661
	PSMC5	280.927	142.857	68.2832	87.2285	2.7251	1.44631
	DHX9	280.927	225.068	87.7926	107.299	2.59363	1.37497
	TPM3	280.927	212.938	90.8731	125.825	2.27905	1.18843
	ATXN2L	280.927	175.203	101.141	105.755	2.20463	1.14054
	DHX15	280.927	214.286	127.838	107.299	2.10606	1.07455
	MLEC	278.876	185.984	73.9306	91.0881	2.81702	1.49417
	AZIN1	278.876	285.715	128.352	132.773	2.16215	1.11247
	INPPL1	276.826	144.205	56.9882	74.8775	3.19288	1.67486
	PPM1G	276.826	173.855	64.1759	81.053	3.10324	1.63378
	GDI2	276.826	190.027	73.9306	86.4565	2.91079	1.54141
	JPT2	276.826	140.162	62.1223	94.9478	2.65479	1.4086
	STIP1	276.826	195.418	82.6586	118.878	2.34322	1.22849
	CSNK1A1	276.826	181.941	120.137	128.141	1.84779	0.885803
	GREB1	274.775	92.9921	42.0994	49.4037	4.01918	2.0069
	GLG1	274.775	146.901	59.0418	73.3337	3.18545	1.6715
	PRDX2	274.775	122.642	64.1759	64.0705	3.09886	1.63174
	RPL34	274.775	133.423	65.7161	71.7898	2.96859	1.56978
	EXT1	274.775	199.461	92.4133	110.386	2.33845	1.22555
	CDK4	272.725	185.984	67.2563	95.7197	2.81458	1.49292
	AHCY	272.725	160.378	70.8502	86.4565	2.75323	1.46113
	GNB1	272.725	196.766	75.9843	101.123	2.65088	1.40647
	HSPA4	272.725	196.766	73.4172	104.211	2.64311	1.40224
	ARF1	272.725	157.682	83.6854	100.351	2.3387	1.22571
	KRT81	272.725	373.316	194.068	184.492	1.70657	0.771103
	SMC1A	270.674	145.553	66.2295	71.0179	3.03268	1.60059
	PABPC4	270.674	140.162	62.1223	75.6495	2.98201	1.57628
	ARCN1	270.674	163.073	69.8234	80.2811	2.88964	1.53089
	AKT1	270.674	223.72	78.0379	93.4039	2.88374	1.52794
	PXN	270.674	204.852	78.5513	106.527	2.56933	1.36139
	CAPN1	268.624	172.507	55.448	73.3337	3.42542	1.77628
	SF1	268.624	176.55	56.9882	82.5969	3.18927	1.67322
	COX4I1	268.624	157.682	62.1223	75.6495	3.09429	1.62961
	RAD21	268.624	137.467	59.0418	76.4214	2.99779	1.5839
	PHB2	268.624	196.766	82.1452	78.7372	2.89273	1.53243
	LAMC1	268.624	190.027	72.3904	88.7723	2.84589	1.50888
	SON	268.624	206.2	89.3329	87.2285	2.68928	1.42722
	CAND1	268.624	165.769	70.3368	91.8601	2.67818	1.42125
	HNRNPDL	268.624	196.766	97.5474	96.4917	2.39843	1.26209
	ETF1	268.624	229.111	93.9535	118.878	2.33863	1.22567
	CNOT2	268.624	171.159	101.141	90.3162	2.29703	1.19977
	XRCC6	268.624	200.809	94.4669	119.65	2.19242	1.13252
	PHGDH	266.573	126.685	36.4519	42.4563	4.98374	2.31723
	CD24	266.573	183.289	60.0686	74.8775	3.33364	1.7371
	RPS28	266.573	148.248	54.9346	72.5617	3.25359	1.70203
	ACTR2	266.573	136.119	55.9614	68.7021	3.23023	1.69164
	YBX3	266.573	149.596	60.0686	71.0179	3.17477	1.66665
	PTMS	266.573	168.464	66.2295	75.6495	3.06625	1.61648
	MYO1B	266.573	141.51	80.6049	96.4917	2.30429	1.20433
	TUBB4B	266.573	268.195	117.57	136.632	2.10371	1.07293
	CCT4	264.522	183.289	78.0379	96.4917	2.56582	1.35942
	RAD23B	264.522	173.855	72.9038	101.895	2.50789	1.32648
	CCT5	264.522	190.027	97.5474	103.439	2.26159	1.17734
	DCAF7	262.472	125.337	53.9078	67.1582	3.20329	1.67955
	CKAP5	262.472	129.38	59.0418	69.474	3.04906	1.60836
	TRPM7	260.421	119.946	32.3447	55.5792	4.3261	2.11307
	LDOC1	260.421	87.6013	39.5324	45.5441	4.09071	2.03235
	EPRS1	260.421	136.119	62.6357	64.0705	3.1296	1.64598
	TMPO	260.421	168.464	72.9038	69.474	3.0123	1.59087
	PPP1CA	260.421	136.119	51.8541	84.1407	2.91585	1.54391
	PSMD7	260.421	126.685	69.8234	74.8775	2.67522	1.41966
	HYOU1	258.371	149.596	49.8005	70.2459	3.39841	1.76486
	TOP1	258.371	150.944	73.4172	92.632	2.46502	1.3016
	UBAP2L	258.371	203.504	89.3329	117.334	2.23488	1.1602
	BPTF	256.32	118.599	34.9117	50.9476	4.36667	2.12653
	SURF4	256.32	144.205	60.5821	66.3863	3.15453	1.65742
	TUBB	256.32	142.857	100.114	90.3162	2.09618	1.06777
	OAS3	254.27	103.774	39.019	44.7721	4.27305	2.09527
	SCIN	254.27	110.512	33.3715	54.0353	4.17338	2.06122
	RPL36	254.27	133.423	56.9882	71.0179	3.02871	1.5987
	HK1	254.27	134.771	57.5016	77.1933	2.88831	1.53023
	UBA52	254.27	171.159	69.8234	106.527	2.41241	1.27048
	BCAP31	254.27	152.291	74.9575	94.9478	2.39287	1.25874
	THOC7	252.219	111.86	43.6396	62.5266	3.42933	1.77793
	ARHGAP35	252.219	152.291	59.5552	60.9827	3.35588	1.74669
	NSD2	252.219	171.159	60.0686	74.8775	3.13739	1.64956
	MYL12A	252.219	153.639	65.2027	95.7197	2.52207	1.33461
	TUFM	252.219	172.507	74.9575	96.4917	2.47727	1.30875
	CS	252.219	200.809	87.2792	108.843	2.30993	1.20785
	BCAM	250.169	102.426	32.8581	46.316	4.45341	2.15491
	CBX5	250.169	90.2967	56.9882	54.0353	3.0666	1.61664
	CACNG4	250.169	148.248	61.6089	69.474	3.03943	1.6038
	ESYT1	250.169	132.076	56.9882	76.4214	2.86519	1.51863
	YME1L1	250.169	136.119	71.3636	78.7372	2.57352	1.36374
	TPD52L1	248.118	110.512	42.6128	62.5266	3.411	1.77019
	DDOST	246.067	105.122	49.2871	55.5792	3.34892	1.7437
	AP1B1	246.067	134.771	55.9614	60.2108	3.27822	1.71291
	RPN1	246.067	152.291	49.8005	71.7898	3.27624	1.71204
	PRKAR1A	246.067	128.033	48.7737	69.474	3.1637	1.66161
	IGFBP5	246.067	105.122	50.3139	65.6143	3.02936	1.59902
	IGFBP2	244.017	92.9921	42.6128	41.6844	3.99787	1.99923
	ZMYND8	244.017	140.162	46.2067	65.6143	3.43566	1.78059
	NFE2L1	244.017	148.248	53.3944	82.5969	2.88449	1.52832
	JUP	244.017	146.901	60.5821	77.9653	2.82154	1.49648
	INTS1	244.017	125.337	52.8809	89.5443	2.59332	1.3748
	S100A16	244.017	138.814	67.7698	83.3688	2.53298	1.34084
	ACTN1	244.017	171.159	101.655	111.93	1.94385	0.958914
	ABCC5	241.966	123.989	46.2067	49.4037	3.82757	1.93643
	LAPTM4A	241.966	126.685	48.7737	67.9301	3.15886	1.6594
	USP7	241.966	148.248	55.9614	80.2811	2.86412	1.51809
	DEK	241.966	82.2104	60.0686	55.5792	2.80314	1.48704
	CUL3	241.966	233.154	95.4937	77.1933	2.75134	1.46013
	FAT1	241.966	129.38	72.3904	74.8775	2.52157	1.33432
	U2AF2	241.966	136.119	67.7698	94.1759	2.33464	1.2232
	CRTAP	239.916	99.7307	51.8541	47.0879	3.43278	1.77938
	ADGRG6	239.916	129.38	63.1491	64.8424	2.88532	1.52873
	YY1	239.916	134.771	68.7966	74.8775	2.60789	1.38289
	MED13L	237.865	132.076	49.8005	57.1231	3.45986	1.79071
	SLC39A8	237.865	115.903	46.2067	57.1231	3.42368	1.77555
	AMFR	237.865	115.903	44.6664	60.2108	3.37317	1.7541
	CHD3	237.865	122.642	45.6932	71.0179	3.08888	1.62708
	MTA2	237.865	119.946	47.2335	68.7021	3.0863	1.62588
	LRP10	237.865	130.728	55.9614	76.4214	2.7843	1.47731
	AMD1	237.865	177.898	69.8234	84.9127	2.68692	1.42595
	CLIC4	235.815	107.817	35.9385	47.0879	4.13882	2.04922
	SLC44A1	235.815	79.515	37.4787	48.6318	3.66192	1.8726
	TPR	235.815	115.903	47.7469	57.895	3.32934	1.73524
	MTCH1	235.815	154.987	61.0955	72.5617	2.92391	1.5479
	ESRP2	235.815	129.38	51.8541	77.1933	2.82993	1.50076
	XPO1	235.815	168.464	74.4441	91.0881	2.4423	1.28824
	FAM102A	233.764	95.6875	39.019	51.7195	3.63078	1.86028
	ARMT1	233.764	101.078	45.6932	52.4915	3.41033	1.76991
	EPCAM	233.764	97.0352	47.7469	51.7195	3.32574	1.73367
	XRN2	233.764	145.553	52.3675	66.3863	3.19415	1.67543
	RNF213	233.764	134.771	63.1491	54.0353	3.14492	1.65302
	KHSRP	233.764	122.642	50.3139	67.9301	3.01415	1.59175
	EPAS1	233.764	202.157	73.9306	77.9653	2.86987	1.52098
	SRSF5	231.713	86.2535	53.3944	47.8599	3.14028	1.6509
	CTNNB1	231.713	190.027	62.6357	77.1933	3.01612	1.59269
	DKC1	231.713	122.642	54.4212	67.9301	2.89621	1.53417
	RHOBTB3	231.713	118.599	57.5016	64.0705	2.88152	1.52683
	GNB2	231.713	132.076	60.5821	87.2285	2.46119	1.29935
	PRMT1	231.713	144.205	82.1452	82.5969	2.28186	1.19021
	CLCN7	229.663	68.7333	38.5055	42.4563	3.68564	1.88191
	PAIP1	229.663	119.946	46.7201	50.1757	3.6081	1.85124
	NELFCD	229.663	137.467	42.0994	69.474	3.29048	1.7183
	FGD5-AS1	229.663	101.078	45.1798	61.7547	3.09293	1.62898
	CTDSP2	229.663	134.771	49.2871	70.2459	3.04881	1.60825
	USP10	229.663	128.033	60.0686	67.9301	2.79452	1.4826
	USP5	229.663	145.553	64.1759	77.1933	2.65415	1.40825
	MDH2	229.663	150.944	76.4977	72.5617	2.55339	1.35241
	PKD1	227.612	103.774	36.9653	44.0002	4.09293	2.03313
	CLIC1	227.612	128.033	59.0418	64.8424	2.87078	1.52145
	LLGL2	227.612	119.946	51.8541	74.8775	2.74248	1.45548
	LASP1	227.612	208.895	84.1988	80.2811	2.65387	1.4081
	COPB2	227.612	125.337	55.9614	81.8249	2.56157	1.35703
	YWHAG	227.612	146.901	80.0915	73.3337	2.44101	1.28748
	TRIP12	227.612	133.423	89.8463	66.3863	2.31089	1.20845
	ARHGDIA	227.612	185.984	83.172	110.386	2.1368	1.09545
	CPNE3	225.562	134.771	46.7201	57.1231	3.46997	1.79492
	HEATR6	225.562	105.122	42.6128	67.1582	3.01248	1.59095
	MACROH2A1	225.562	148.248	60.0686	65.6143	2.97423	1.57252
	WDR6	225.562	130.728	48.2603	78.7372	2.80549	1.48825
	HSBP1	225.562	111.86	62.6357	57.895	2.79947	1.48515
	ATP2B1	225.562	145.553	55.9614	78.7372	2.75515	1.46213
	ACTR3	225.562	141.51	62.1223	80.2811	2.57769	1.36608
	SPTAN1	225.562	138.814	69.31	77.9653	2.47412	1.30691
	TFRC	225.562	184.636	89.3329	104.983	2.11099	1.07792
	SYNE2	223.511	60.647	36.4519	20.8422	4.95964	2.31024
	KDM5C	223.511	117.251	38.5055	50.9476	3.80939	1.92956
	ST13	223.511	95.6875	41.586	43.2283	3.7635	1.91208
	MAP4	223.511	146.901	39.5324	65.6143	3.52281	1.81673
	DDX6	223.511	105.122	42.0994	53.2634	3.44613	1.78498
	C1orf43	223.511	126.685	47.2335	60.9827	3.23608	1.69425
	CDC25B	223.511	97.0352	41.586	60.2108	3.14889	1.65484
	DDX42	223.511	119.946	55.9614	64.8424	2.8431	1.50747
	CCT6A	223.511	168.464	77.0111	108.843	2.10905	1.07659
	PRSS23	223.511	169.812	65.2027	123.509	2.08425	1.05953
	SQLE	223.511	145.553	79.0647	98.0355	2.08393	1.05931
	MARCHF6	221.461	88.949	44.6664	54.0353	3.14492	1.65303
	DDX54	221.461	132.076	52.3675	65.6143	2.99653	1.58329
	RBM8A	221.461	117.251	56.4748	57.1231	2.98167	1.57612
	VDAC1	221.461	183.289	60.5821	77.9653	2.92138	1.54665
	TMED2	221.461	140.162	56.9882	71.0179	2.82504	1.49827
	YWHAE	221.461	187.332	69.31	82.5969	2.69107	1.42818
	WDR1	221.461	132.076	58.5284	74.8775	2.65008	1.40604
	ATN1	221.461	117.251	61.6089	66.3863	2.64628	1.40397
	HNRNPA0	221.461	138.814	60.0686	77.1933	2.62472	1.39217
	ACLY	221.461	177.898	77.0111	76.4214	2.60283	1.38008
	MTHFD1	221.461	141.51	65.7161	84.9127	2.4097	1.26885
	OBSL1	219.41	91.6444	40.5592	50.1757	3.42817	1.77744
	OS9	219.41	121.294	50.8273	57.895	3.13371	1.64787
	APRT	219.41	153.639	56.9882	77.1933	2.78018	1.47518
	TNFRSF12A	219.41	192.723	64.1759	103.439	2.45881	1.29796
	NOP53	217.36	113.208	34.9117	43.2283	4.23045	2.08081
	SCRN1	217.36	132.076	41.0726	42.4563	4.1834	2.06468
	TCEA1	217.36	99.7307	37.4787	46.316	3.78413	1.91996
	LAMP2	217.36	99.7307	36.9653	61.7547	3.21202	1.68348
	MTPN	217.36	125.337	51.8541	57.895	3.12255	1.64272
	WARS1	217.36	87.6013	46.7201	50.9476	3.12243	1.64267
	DNM2	217.36	113.208	58.5284	54.0353	2.93671	1.5542
	BAG6	217.36	129.38	53.9078	69.474	2.8103	1.49072
	SPTBN1	217.36	203.504	78.5513	80.2811	2.64974	1.40585
	FBL	217.36	157.682	74.9575	72.5617	2.54233	1.34615
	PHB	217.36	171.159	91.8999	98.8075	2.03725	1.02662
	RSL24D1	215.309	121.294	37.4787	40.1405	4.33659	2.11656
	CTSA	215.309	88.949	37.9921	40.9125	3.85602	1.94711
	HSPB8	215.309	106.469	38.5055	53.2634	3.5064	1.80999
	FAM168B	215.309	115.903	47.7469	54.0353	3.25413	1.70227
	STAG2	215.309	129.38	56.4748	61.7547	2.91543	1.54371
	NCAPD2	215.309	113.208	54.4212	64.0705	2.77249	1.47118
	BUB3	215.309	122.642	55.448	69.474	2.70529	1.43579
	CSNK1D	215.309	105.122	60.0686	68.7021	2.48838	1.31521
	OAZ1	215.309	126.685	63.6625	84.9127	2.30182	1.20278
	USP8	213.258	102.426	35.9385	37.8247	4.2797	2.09751
	ASS1	213.258	92.9921	33.8849	52.4915	3.54554	1.826
	AP1G1	213.258	142.857	51.8541	54.0353	3.36309	1.74979
	GARS1	213.258	122.642	47.2335	67.1582	2.9364	1.55405
	CYB561	213.258	129.38	49.2871	78.7372	2.67636	1.42027
	MLF2	213.258	130.728	54.4212	78.7372	2.58329	1.36921
	ZMYND11	211.208	87.6013	31.3178	52.4915	3.56534	1.83404
	EIF2AK1	211.208	126.685	48.2603	48.6318	3.48731	1.80211
	REEP5	211.208	113.208	45.6932	49.4037	3.41142	1.77037
	ZDHHC7	211.208	118.599	41.0726	57.1231	3.35867	1.74789
	IMPDH2	211.208	130.728	46.2067	58.6669	3.26046	1.70507
	KMT2D	211.208	129.38	43.6396	61.7547	3.23156	1.69223
	BAZ1B	211.208	119.946	43.1262	59.4389	3.22872	1.69096
	JAK1	211.208	133.423	63.1491	64.0705	2.70895	1.43773
	HADHA	211.208	110.512	49.8005	77.9653	2.51805	1.33231
	SYT12	211.208	103.774	48.7737	84.9127	2.35612	1.23642
	ZFR	211.208	150.944	77.5245	78.7372	2.3176	1.21263
	APEX1	209.157	134.771	47.2335	60.9827	3.17816	1.66819
	AP3D1	209.157	101.078	43.1262	67.9301	2.7935	1.48207
	USP9X	209.157	88.949	55.9614	57.895	2.61827	1.38861
	NET1	207.107	130.728	23.6167	27.7896	6.57185	2.7163
	PIK3R1	207.107	79.515	30.8044	44.7721	3.79247	1.92314
	LARS1	207.107	87.6013	45.1798	37.8247	3.5505	1.82802
	ARL6IP1	207.107	115.903	44.153	52.4915	3.34225	1.74082
	MYO5C	207.107	101.078	44.6664	50.9476	3.22322	1.6885
	ARF3	207.107	101.078	40.0458	59.4389	3.09782	1.63125
	SSRP1	207.107	163.073	69.31	67.1582	2.71257	1.43966
	PSMB4	207.107	126.685	61.0955	64.0705	2.66679	1.41511
	NIBAN2	207.107	137.467	74.4441	71.7898	2.35632	1.23653
	ANKRD52	207.107	132.076	71.877	74.8775	2.31122	1.20866
	KCMF1	207.107	184.636	82.1452	108.071	2.05947	1.04227
	TXNIP	205.056	48.5176	14.3754	20.8422	7.2002	2.84804
	WASHC5	205.056	132.076	39.5324	47.0879	3.89207	1.96054
	NRDC	205.056	109.165	45.6932	47.8599	3.35874	1.74792
	STT3B	205.056	118.599	45.6932	52.4915	3.29639	1.72089
	SAP18	205.056	99.7307	43.1262	52.4915	3.18756	1.67245
	ATIC	205.056	138.814	49.8005	60.9827	3.10399	1.63413
	PDS5A	205.056	86.2535	39.5324	60.2108	2.9206	1.54626
	UBR4	205.056	83.5581	41.586	57.895	2.9012	1.53665
	WNK1	205.056	148.248	59.5552	65.6143	2.82261	1.49703
	UBA2	205.056	102.426	59.0418	56.3511	2.66465	1.41395
	PSMC3	205.056	152.291	57.5016	79.5091	2.60817	1.38304
	UGDH	205.056	165.769	69.8234	93.4039	2.27183	1.18385
	RBBP7	205.056	134.771	78.0379	79.5091	2.15699	1.10902
	SNRNP70	205.056	126.685	74.9575	87.2285	2.04544	1.03241
	KMT2A	203.006	66.0379	31.3178	32.4212	4.22102	2.07759
	YARS1	203.006	114.555	40.5592	54.0353	3.35708	1.74721
	SETD7	203.006	125.337	45.6932	65.6143	2.94987	1.56065
	PA2G4	203.006	128.033	65.2027	66.3863	2.5157	1.33096
	GHITM	203.006	169.812	62.6357	91.8601	2.41312	1.2709
	TSC22D3	200.955	76.8196	23.6167	37.0528	4.57849	2.19487
	GRINA	200.955	138.814	38.5055	43.2283	4.15702	2.05555
	DHX38	200.955	94.3398	34.9117	56.3511	3.23565	1.69406
	CCDC47	200.955	115.903	47.7469	56.3511	3.04385	1.6059
	SH3BGRL	200.955	115.903	52.3675	64.8424	2.70334	1.43474
	WDR26	200.955	72.7764	52.3675	49.4037	2.68967	1.42743
	RNF10	200.955	95.6875	49.2871	64.0705	2.61687	1.38784
	PDIA6	200.955	152.291	61.6089	77.9653	2.53089	1.33964
	SLC25A39	200.955	113.208	48.2603	83.3688	2.38673	1.25503
	ATP6AP1	198.904	128.033	49.8005	57.895	3.03575	1.60205
	NCKAP1	198.904	103.774	49.2871	54.8073	2.90773	1.53989
	DAZAP1	198.904	119.946	40.0458	73.3337	2.81225	1.49172
	SRSF7	198.904	153.639	72.9038	75.6495	2.37318	1.24682
	TRAP1	198.904	134.771	71.877	75.6495	2.2618	1.17747
	WAC	198.904	117.251	72.9038	91.0881	1.92787	0.947009
	PAWR	196.854	82.2104	32.8581	36.2809	4.03628	2.01303
	POLR2A	196.854	82.2104	33.8849	44.0002	3.58303	1.84118
	AHCYL1	196.854	83.5581	39.019	44.7721	3.34656	1.74268
	TSC2	196.854	97.0352	42.0994	46.316	3.32396	1.7329
	TMEM164	196.854	132.076	52.3675	56.3511	3.02551	1.59718
	NME4	196.854	125.337	44.153	65.6143	2.93522	1.55347
	TCP1	196.854	148.248	52.3675	68.7021	2.85044	1.51119
	LUC7L3	196.854	91.6444	45.6932	57.895	2.78505	1.4777
	LMNB2	196.854	125.337	63.1491	68.7021	2.4436	1.28901
	CSRP1	196.854	154.987	68.7966	78.7372	2.38481	1.25388
	KHDRBS1	196.854	119.946	55.9614	84.9127	2.24882	1.16917
	MAPK6	196.854	95.6875	52.3675	81.8249	2.18001	1.12434
	UBE2K	196.854	141.51	95.4937	101.123	1.72093	0.783186
	PTK2	194.803	86.2535	36.4519	40.9125	3.6329	1.86112
	VPS35	194.803	87.6013	38.5055	39.3686	3.62642	1.85855
	BAZ2A	194.803	95.6875	45.1798	50.9476	3.02194	1.59547
	MARCKSL1	194.803	101.078	49.2871	54.0353	2.86367	1.51787
	RAB10	194.803	153.639	69.31	75.6495	2.40372	1.26527
	PUM1	194.803	203.504	115.003	86.4565	1.97711	0.983392
	FKBP8	192.753	92.9921	41.0726	35.5089	3.73125	1.89966
	DCTN1	192.753	90.2967	35.9385	43.2283	3.57536	1.83809
	DYNC1LI2	192.753	128.033	44.153	49.4037	3.42878	1.77769
	MYO6	192.753	71.4287	31.3178	47.8599	3.33656	1.73836
	ITPR3	192.753	109.165	39.019	55.5792	3.19158	1.67427
	UBTF	192.753	130.728	46.2067	55.5792	3.17805	1.66814
	TGOLN2	192.753	95.6875	41.0726	51.7195	3.10846	1.6362
	PAK2	192.753	102.426	43.1262	53.2634	3.06235	1.61464
	MAVS	192.753	79.515	44.153	47.0879	2.98405	1.57727
	PPM1D	192.753	95.6875	38.5055	58.6669	2.96833	1.56965
	BANF1	192.753	130.728	47.2335	64.0705	2.90628	1.53918
	AKT2	192.753	88.949	44.6664	52.4915	2.89942	1.53577
	TPM1	192.753	126.685	51.8541	64.0705	2.75556	1.46235
	GSR	192.753	118.599	61.0955	61.7547	2.5344	1.34164
	SZRD1	192.753	128.033	65.7161	75.6495	2.26919	1.18218
	MCM4	192.753	132.076	68.7966	94.9478	1.98375	0.988233
	CIZ1	190.702	132.076	36.4519	49.4037	3.75954	1.91056
	MYH14	190.702	126.685	43.1262	49.4037	3.4301	1.77825
	PICALM	190.702	107.817	41.0726	54.8073	3.11347	1.63852
	RPL7L1	190.702	103.774	36.9653	61.7547	2.98294	1.57674
	SCARB2	190.702	98.3829	44.153	54.8073	2.92122	1.54657
	SUPT5H	190.702	138.814	49.2871	64.8424	2.88722	1.52968
	PYGB	190.702	191.375	75.9843	71.0179	2.59913	1.37803
	FLII	190.702	156.335	62.1223	72.5617	2.57667	1.36551
	PSMD4	190.702	126.685	53.3944	72.5617	2.51982	1.33332
	PDIA4	190.702	90.2967	55.9614	57.895	2.46801	1.30335
	SLC4A2	190.702	119.946	69.8234	74.8775	2.14683	1.10221
	AGO2	188.652	90.2967	35.4251	40.1405	3.69147	1.8842
	SMARCA5	188.652	84.9058	33.8849	40.9125	3.65732	1.87079
	SCAF11	188.652	72.7764	31.8312	44.0002	3.44749	1.78555
	VAPB	188.652	66.0379	37.4787	43.2283	3.15573	1.65797
	EP400	188.652	84.9058	42.6128	49.4037	2.97292	1.57188
	ATP5PB	188.652	92.9921	43.6396	52.4915	2.92979	1.5508
	MTSS2	188.652	128.033	56.4748	57.1231	2.78777	1.47911
	CHCHD2	188.652	140.162	48.2603	70.2459	2.77465	1.47231
	DNMT1	188.652	91.6444	50.8273	67.1582	2.37568	1.24834
	BCLAF1	188.652	123.989	63.6625	71.0179	2.32136	1.21497
	CUX1	186.601	78.1673	26.1838	27.7896	4.90554	2.29441
	PRPF6	186.601	99.7307	39.5324	40.9125	3.55936	1.83162
	TAF7	186.601	76.8196	35.9385	38.5967	3.53418	1.82138
	EMP2	186.601	109.165	35.9385	51.7195	3.37409	1.7545
	NDST1	186.601	66.0379	38.5055	37.0528	3.34363	1.74141
	QSOX1	186.601	103.774	38.5055	48.6318	3.33238	1.73655
	THAP12	186.601	59.2993	37.4787	44.7721	2.98964	1.57997
	TRIM25	186.601	102.426	49.2871	50.1757	2.90588	1.53898
	ATXN7L3B	186.601	82.2104	39.019	58.6669	2.75179	1.46037
	TM9SF3	186.601	110.512	59.0418	61.7547	2.45962	1.29844
	UBE2D2	186.601	114.555	47.7469	88.0004	2.21851	1.14959
	CAPZB	186.601	113.208	70.8502	66.3863	2.18462	1.12738
	CBX3	186.601	137.467	59.0418	91.8601	2.14754	1.10268
	TAF15	186.601	134.771	61.0955	94.1759	2.06975	1.04945
	TAGLN2	186.601	179.246	81.6318	100.351	2.01033	1.00744
	MYO5A	184.551	83.5581	33.8849	44.0002	3.44236	1.7834
	TBX2	184.551	103.774	41.586	43.2283	3.39948	1.76531
	CLSTN1	184.551	76.8196	34.3983	48.6318	3.1479	1.65439
	CDYL2	184.551	119.946	42.6128	58.6669	3.00649	1.58808
	KDM2A	184.551	91.6444	41.0726	54.8073	2.88064	1.52639
	NDUFB9	184.551	117.251	36.9653	71.7898	2.77506	1.47252
	EIF1AX	184.551	132.076	46.7201	69.474	2.72498	1.44624
	CDKN1A	184.551	106.469	46.7201	60.2108	2.72157	1.44444
	SLC9A3R2	184.551	113.208	47.2335	68.7021	2.56831	1.36082
	ACADVL	184.551	114.555	50.3139	71.7898	2.44961	1.29255
	PPIB	184.551	187.332	82.1452	106.527	1.97105	0.978967
	RAB5B	182.5	82.2104	21.0497	35.5089	4.68028	2.2266
	NSD1	182.5	87.6013	31.3178	27.7896	4.56967	2.19209
	MDN1	182.5	74.1241	32.8581	31.6493	3.97822	1.99212
	INPP4B	182.5	70.081	30.8044	38.5967	3.63944	1.86372
	SUMO3	182.5	105.122	35.4251	47.0879	3.48577	1.80148
	HMGB2	182.5	87.6013	37.4787	40.1405	3.47982	1.79901
	RXRA	182.5	97.0352	37.4787	43.2283	3.46358	1.79226
	ANXA5	182.5	102.426	42.6128	53.2634	2.97181	1.57134
	ITGAV	182.5	105.122	49.2871	47.8599	2.96068	1.56593
	PDIA3	182.5	137.467	53.3944	55.5792	2.93619	1.55394
	SRF	182.5	177.898	60.0686	64.0705	2.90318	1.53763
	SUPT16H	182.5	119.946	48.7737	56.3511	2.87702	1.52458
	FAM234A	182.5	114.555	45.1798	58.6669	2.86052	1.51628
	CAPNS1	182.5	161.725	62.1223	70.2459	2.60051	1.3788
	PRPF19	182.5	101.078	46.2067	79.5091	2.25571	1.17358
	HMGCS1	182.5	157.682	84.1988	67.9301	2.23614	1.16101
	RAB1A	182.5	136.119	81.6318	85.6846	1.90429	0.929253
	PLCG1	180.449	78.1673	30.8044	44.7721	3.42192	1.7748
	TANC2	180.449	79.515	42.0994	33.9651	3.41769	1.77302
	METTL9	180.449	91.6444	32.3447	50.9476	3.26674	1.70785
	GOLM1	180.449	98.3829	42.0994	44.0002	3.23849	1.69532
	NACC1	180.449	113.208	35.9385	75.6495	2.63162	1.39595
	HP1BP3	180.449	80.8627	47.7469	54.0353	2.56737	1.36029
	KIF5B	180.449	134.771	53.9078	72.5617	2.49246	1.31757
	TNFRSF1A	180.449	105.122	50.3139	66.3863	2.44705	1.29104
	MAPKAPK2	180.449	114.555	46.7201	75.6495	2.41077	1.26949
	ASPH	180.449	179.246	90.3597	95.7197	1.93302	0.950856
	NR2F2	178.399	92.9921	36.9653	33.9651	3.82616	1.9359
	JUNB	178.399	68.7333	25.157	41.6844	3.69729	1.88647
	IST1	178.399	97.0352	41.0726	45.5441	3.17992	1.66899
	ERP29	178.399	102.426	38.5055	51.7195	3.11249	1.63807
	STT3A	178.399	91.6444	43.6396	43.2283	3.10867	1.6363
	EXOC7	178.399	90.2967	29.7776	57.1231	3.09198	1.62853
	UBP1	178.399	87.6013	37.9921	49.4037	3.04362	1.60579
	KDELR1	178.399	94.3398	42.6128	51.7195	2.89125	1.53169
	DDX23	178.399	114.555	39.019	64.8424	2.82063	1.49602
	HCFC1	178.399	123.989	53.3944	58.6669	2.69842	1.43211
	TPX2	178.399	110.512	47.2335	63.2985	2.61382	1.38616
	CSE1L	178.399	121.294	55.9614	60.9827	2.5627	1.35767
	CACNA1H	178.399	111.86	48.2603	68.7021	2.48164	1.3113
	SNRPB	178.399	101.078	56.4748	61.7547	2.36385	1.24114
	NAA50	178.399	91.6444	57.5016	60.9827	2.27915	1.18849
	RBL2	176.348	70.081	24.1301	26.2457	4.89181	2.29037
	PRPF38B	176.348	61.9947	27.724	35.5089	3.76929	1.91429
	USP22	176.348	114.555	42.6128	39.3686	3.54841	1.82717
	THOC2	176.348	78.1673	33.8849	39.3686	3.47445	1.79678
	PKP4	176.348	74.1241	37.4787	38.5967	3.29242	1.71915
	UBN1	176.348	92.9921	37.4787	48.6318	3.12785	1.64517
	EIF5B	176.348	118.599	50.3139	44.7721	3.10189	1.63315
	PDAP1	176.348	138.814	41.586	60.9827	3.0727	1.61951
	SP1	176.348	63.3424	36.9653	41.6844	3.04757	1.60766
	HACD3	176.348	79.515	46.2067	37.8247	3.04485	1.60637
	SMG7	176.348	78.1673	39.5324	52.4915	2.76576	1.46767
	SF3B4	176.348	92.9921	43.1262	58.6669	2.64596	1.40379
	CDC37	176.348	92.9921	42.0994	60.2108	2.63259	1.39648
	ANAPC5	176.348	115.903	51.8541	63.2985	2.53795	1.34366
	ERH	176.348	94.3398	49.8005	60.2108	2.46055	1.29898
	MCM3	176.348	106.469	58.015	71.0179	2.19183	1.13213
	MYBL2	176.348	111.86	58.015	81.053	2.07243	1.05132
	TRA2B	176.348	150.944	82.1452	82.5969	1.98669	0.99037
	C6orf62	176.348	106.469	55.448	89.5443	1.95057	0.963896
	LRRC59	176.348	141.51	88.8195	88.0004	1.79764	0.846102
	VPS51	174.298	86.2535	21.5631	50.9476	3.59328	1.8453
	SERP1	174.298	102.426	39.5324	41.6844	3.40723	1.7686
	CBX6	174.298	103.774	37.9921	52.4915	3.07317	1.61973
	ECPAS	174.298	87.6013	41.586	48.6318	2.90296	1.53753
	TBC1D9B	174.298	92.9921	42.6128	50.1757	2.88064	1.52639
	FTSJ3	174.298	101.078	40.5592	57.895	2.797	1.48388
	LGALS3	174.298	72.7764	40.5592	48.6318	2.77017	1.46997
	STUB1	174.298	114.555	40.5592	64.0705	2.76072	1.46504
	CAPN15	174.298	80.8627	41.0726	53.2634	2.70481	1.43552
	SPAG9	174.298	102.426	52.3675	60.2108	2.45806	1.29752
	TRMT112	174.298	94.3398	41.586	67.9301	2.45295	1.29452
	SRSF6	174.298	80.8627	63.6625	50.9476	2.22633	1.15467
	NOLC1	174.298	123.989	84.1988	89.5443	1.71683	0.779747
	PALLD	172.247	71.4287	27.2106	34.737	3.93358	1.97584
	TRIO	172.247	105.122	33.8849	42.4563	3.63328	1.86127
	PSME3	172.247	123.989	35.4251	47.8599	3.5569	1.83062
	ASAP1	172.247	99.7307	34.3983	44.7721	3.43535	1.78046
	SEC31A	172.247	92.9921	37.4787	40.9125	3.38353	1.75853
	RAB6A	172.247	95.6875	33.8849	47.8599	3.2777	1.71268
	NBN	172.247	91.6444	35.9385	47.8599	3.14913	1.65495
	CTCF	172.247	95.6875	38.5055	48.6318	3.07486	1.62052
	CYC1	172.247	105.122	43.6396	47.0879	3.05716	1.61219
	COPA	172.247	90.2967	47.2335	41.6844	2.95266	1.56201
	HMGB3	172.247	92.9921	45.1798	46.316	2.89892	1.53552
	PPP6R3	172.247	90.2967	43.6396	47.0879	2.89376	1.53295
	OGDH	172.247	92.9921	47.7469	44.0002	2.89098	1.53156
	TRIR	172.247	91.6444	39.019	54.8073	2.81256	1.49188
	IGSF3	172.247	80.8627	46.7201	51.7195	2.57122	1.36245
	RPS26	172.247	122.642	50.8273	73.3337	2.37505	1.24796
	VEZF1	172.247	83.5581	48.2603	60.9827	2.34162	1.22751
	COL12A1	170.197	64.6902	20.0229	25.4738	5.16272	2.36813
	GOLGB1	170.197	87.6013	17.9693	43.2283	4.21255	2.0747
	PARD6B	170.197	70.081	24.1301	39.3686	3.78397	1.9199
	PI4KA	170.197	95.6875	28.2374	44.7721	3.64177	1.86464
	SLC44A2	170.197	76.8196	26.6972	43.2283	3.53256	1.82072
	NDUFV1	170.197	92.9921	33.3715	46.316	3.30276	1.72367
	SHROOM3	170.197	111.86	32.3447	57.1231	3.15261	1.65655
	EIF4EBP2	170.197	102.426	35.9385	51.7195	3.11007	1.63695
	PSMC1	170.197	128.033	48.7737	54.0353	2.90081	1.53645
	ERGIC3	170.197	86.2535	37.4787	53.2634	2.82614	1.49883
	GRB2	170.197	95.6875	43.6396	56.3511	2.65909	1.41093
	STARD7	170.197	123.989	58.5284	57.895	2.52686	1.33735
	CELSR2	170.197	136.119	50.3139	72.5617	2.49289	1.31782
	DIAPH1	170.197	128.033	52.8809	67.1582	2.48443	1.31292
	PFN2	170.197	115.903	60.0686	71.0179	2.18253	1.126
	CIRBP	168.146	71.4287	32.3447	20.0703	4.57074	2.19243
	ARFGEF3	168.146	78.1673	22.5899	34.737	4.29664	2.10321
	OSBPL9	168.146	94.3398	34.3983	28.5615	4.1691	2.05974
	MCCC2	168.146	92.9921	31.3178	32.4212	4.09699	2.03456
	PFKL	168.146	101.078	34.9117	38.5967	3.6625	1.87283
	PURB	168.146	78.1673	24.6435	43.2283	3.6291	1.85961
	MACF1	168.146	74.1241	27.2106	41.6844	3.51651	1.81415
	DDIT4	168.146	101.078	43.1262	38.5967	3.29436	1.72
	SEPTIN11	168.146	86.2535	41.0726	37.8247	3.22444	1.68905
	G3BP1	168.146	92.9921	33.3715	49.4037	3.15479	1.65754
	PIAS3	168.146	109.165	32.8581	56.3511	3.10854	1.63624
	SEPTIN7	168.146	74.1241	35.9385	43.2283	3.06025	1.61365
	RAD23A	168.146	55.2562	31.3178	41.6844	3.06021	1.61363
	ARID1A	168.146	88.949	34.3983	50.1757	3.03988	1.60402
	LAMP1	168.146	87.6013	42.6128	43.2283	2.97931	1.57498
	UBFD1	168.146	84.9058	37.9921	51.7195	2.82072	1.49607
	GLUD1	168.146	88.949	46.2067	47.0879	2.75573	1.46244
	EPN1	168.146	94.3398	38.5055	57.895	2.72287	1.44513
	TLN1	168.146	115.903	49.8005	54.8073	2.71537	1.44115
	DHCR7	168.146	79.515	42.0994	50.1757	2.68394	1.42435
	UBE2I	168.146	101.078	40.0458	62.5266	2.62473	1.39217
	RHOT2	168.146	84.9058	39.5324	57.1231	2.61808	1.38851
	TRRAP	168.146	103.774	39.5324	65.6143	2.5861	1.37078
	RBM3	168.146	125.337	52.3675	62.5266	2.55438	1.35297
	TMOD3	168.146	78.1673	50.8273	50.1757	2.43867	1.2861
	H2AX	168.146	102.426	43.6396	78.7372	2.21098	1.14468
	HAT1	168.146	215.634	159.67	198.387	1.07184	0.100092
	RC3H2	168.146	121.294	141.7	165.966	0.940761	-0.0881005
	DRAM1	166.095	64.6902	23.6167	22.3861	5.01677	2.32676
	TPBG	166.095	52.5608	22.0765	35.5089	3.79707	1.92489
	PTGFRN	166.095	101.078	32.8581	41.6844	3.58418	1.84164
	TMEM30A	166.095	102.426	36.4519	39.3686	3.54154	1.82438
	S100A14	166.095	70.081	31.3178	37.8247	3.41579	1.77222
	RBBP4	166.095	68.7333	41.0726	36.2809	3.03579	1.60207
	SMC4	166.095	91.6444	44.153	42.4563	2.97589	1.57332
	EIF3D	166.095	95.6875	45.1798	46.316	2.86115	1.51659
	XPO6	166.095	103.774	45.6932	51.7195	2.77037	1.47008
	ACIN1	166.095	109.165	57.5016	53.2634	2.48508	1.31329
	GOT2	166.095	126.685	52.3675	65.6143	2.48157	1.31125
	SLC6A6	166.095	95.6875	40.0458	66.3863	2.45963	1.29844
	FAU	166.095	99.7307	53.9078	54.8073	2.44516	1.28993
	IPO5	166.095	102.426	45.1798	66.3863	2.40684	1.26714
	ATAD2	166.095	117.251	51.8541	67.9301	2.36547	1.24213
	MCM6	166.095	111.86	62.6357	67.9301	2.12885	1.09008
	SRSF11	166.095	106.469	68.2832	61.7547	2.09604	1.06767
	ADD1	166.095	97.0352	58.5284	72.5617	2.00725	1.00522
	AFF4	164.045	88.949	26.1838	34.737	4.15283	2.0541
	UCP2	164.045	74.1241	24.6435	39.3686	3.72069	1.89557
	SH3GLB2	164.045	106.469	35.9385	38.5967	3.62935	1.85971
	H1-10	164.045	113.208	30.8044	50.9476	3.39139	1.76187
	TADA3	164.045	79.515	29.7776	44.7721	3.26708	1.708
	TWF1	164.045	68.7333	33.3715	39.3686	3.20014	1.67813
	GNA13	164.045	98.3829	34.3983	47.8599	3.1903	1.67369
	TASOR2	164.045	72.7764	33.8849	41.6844	3.13383	1.64793
	SEC24C	164.045	92.9921	41.586	40.9125	3.11566	1.63954
	RANBP2	164.045	111.86	43.6396	48.6318	2.99015	1.58022
	SMG5	164.045	109.165	48.7737	47.0879	2.85004	1.51098
	ARF6	164.045	106.469	40.5592	64.8424	2.56651	1.35981
	GALNT10	164.045	94.3398	48.7737	55.5792	2.47607	1.30805
	FUBP1	164.045	113.208	45.1798	73.3337	2.33942	1.22615
	MCM2	164.045	111.86	50.8273	67.1582	2.33846	1.22556
	ILF2	164.045	163.073	65.2027	83.3688	2.20175	1.13865
	TNPO1	164.045	134.771	66.2295	74.1056	2.1293	1.09038
	NIPBL	164.045	98.3829	56.9882	76.4214	1.96708	0.976058
	NCAM2	161.994	64.6902	25.6704	23.9299	4.57023	2.19227
	SEZ6L2	161.994	68.7333	30.291	29.3335	3.86968	1.95221
	NPLOC4	161.994	87.6013	36.4519	44.7721	3.07293	1.61961
	CDC42SE1	161.994	76.8196	30.8044	48.6318	3.00636	1.58802
	RBM25	161.994	101.078	46.7201	47.8599	2.78149	1.47586
	TNS3	161.994	111.86	51.3407	50.1757	2.69764	1.4317
	CPSF1	161.994	84.9058	40.5592	54.8073	2.58896	1.37237
	INHBB	161.994	88.949	45.6932	52.4915	2.55583	1.35379
	PCNX3	161.994	80.8627	42.6128	54.0353	2.5128	1.32929
	EIF3I	161.994	118.599	47.2335	66.3863	2.46958	1.30427
	ADAM9	161.994	95.6875	52.3675	57.895	2.33698	1.22465
	LAMA5	161.994	121.294	67.2563	78.7372	1.94042	0.956367
	CCNL2	159.944	60.647	20.0229	37.0528	3.86488	1.95042
	MADD	159.944	74.1241	28.2374	37.8247	3.54315	1.82503
	GLUL	159.944	101.078	36.4519	44.0002	3.24444	1.69797
	ANXA11	159.944	80.8627	37.9921	37.8247	3.17616	1.66728
	CSNK2A1	159.944	92.9921	40.0458	43.2283	3.03739	1.60283
	OGA	159.944	75.4719	35.9385	41.6844	3.03281	1.60066
	EIF3K	159.944	106.469	41.586	53.2634	2.8088	1.48995
	ETFA	159.944	107.817	47.7469	48.6318	2.77822	1.47416
	CLUH	159.944	113.208	48.2603	51.7195	2.73207	1.44999
	CREBBP	159.944	74.1241	45.6932	40.1405	2.72699	1.44731
	GTF3C1	159.944	123.989	40.5592	66.3863	2.65494	1.40868
	EIF2S1	159.944	106.469	47.7469	53.2634	2.63748	1.39916
	AP2B1	159.944	141.51	59.5552	64.0705	2.43844	1.28596
	SUMO2	159.944	75.4719	51.8541	45.5441	2.41704	1.27324
	CHTOP	159.944	129.38	49.2871	77.1933	2.2875	1.19377
	ARPC2	159.944	95.6875	47.7469	71.0179	2.15242	1.10596
	MTCH2	159.944	214.286	149.402	223.089	1.00467	0.0067224
	ZMIZ2	157.893	66.0379	21.5631	30.8773	4.2702	2.0943
	ECI1	157.893	80.8627	29.7776	33.1931	3.79154	1.92278
	ZMIZ1	157.893	67.3856	26.1838	36.2809	3.6065	1.8506
	UBXN4	157.893	123.989	35.9385	53.2634	3.16005	1.65995
	BRD2	157.893	88.949	31.3178	47.0879	3.14827	1.65456
	COPG1	157.893	97.0352	32.3447	48.6318	3.14818	1.65452
	PTBP3	157.893	82.2104	32.3447	44.7721	3.11351	1.63854
	CYFIP1	157.893	97.0352	34.3983	47.8599	3.09913	1.63186
	PDCD6IP	157.893	84.9058	39.5324	42.4563	2.96137	1.56627
	TOMM20	157.893	118.599	32.8581	61.7547	2.92235	1.54713
	KDELR2	157.893	90.2967	39.5324	47.0879	2.86526	1.51867
	BAG3	157.893	97.0352	39.5324	59.4389	2.57578	1.36501
	UBE2N	157.893	109.165	50.8273	58.6669	2.43901	1.2863
	HNRNPL	157.893	149.596	50.3139	79.5091	2.36853	1.24399
	GRHL2	155.843	67.3856	18.4827	33.9651	4.2562	2.08957
	DHX40	155.843	88.949	29.7776	30.8773	4.03581	2.01286
	MAP4K4	155.843	91.6444	33.8849	28.5615	3.96319	1.98666
	FAM199X	155.843	78.1673	27.2106	32.4212	3.92425	1.97242
	PSME1	155.843	83.5581	32.3447	37.0528	3.44971	1.78647
	SMARCC2	155.843	82.2104	33.3715	40.9125	3.20464	1.68016
	GMPS	155.843	83.5581	27.724	49.4037	3.10395	1.63411
	ARPC5	155.843	80.8627	39.019	39.3686	3.01968	1.5944
	TLE5	155.843	92.9921	37.9921	44.7721	3.00655	1.58811
	SPDEF	155.843	64.6902	24.6435	49.4037	2.97827	1.57447
	ZMYM2	155.843	110.512	37.9921	53.2634	2.91878	1.54537
	NDUFB10	155.843	71.4287	33.3715	49.4037	2.74565	1.45715
	ATP5F1C	155.843	84.9058	41.586	52.4915	2.55905	1.35561
	ROCK1	155.843	87.6013	39.019	57.1231	2.53213	1.34035
	COPZ1	155.843	74.1241	35.9385	55.5792	2.51281	1.3293
	POLE	155.843	76.8196	36.9653	56.3511	2.49326	1.31803
	RCC1	155.843	113.208	44.153	71.7898	2.32054	1.21446
	METAP2	155.843	102.426	46.7201	69.474	2.22274	1.15234
	TIAL1	155.843	146.901	57.5016	79.5091	2.20963	1.14381
	MBNL1	155.843	70.081	77.5245	53.2634	1.72741	0.788607
	DNAJC13	153.792	64.6902	21.5631	26.2457	4.56991	2.19217
	DLST	153.792	87.6013	26.1838	33.1931	4.06544	2.02341
	MGRN1	153.792	66.0379	22.5899	33.9651	3.88701	1.95866
	POGK	153.792	101.078	35.4251	35.5089	3.59306	1.84521
	IGF1R	153.792	70.081	32.8581	33.1931	3.38939	1.76102
	RAD51C	153.792	66.0379	23.6167	42.4563	3.32707	1.73425
	TMED9	153.792	75.4719	29.2642	42.4563	3.19663	1.67655
	E2F4	153.792	90.2967	34.3983	43.2283	3.1444	1.65278
	SPEN	153.792	90.2967	37.4787	41.6844	3.08336	1.62451
	GOLGA4	153.792	91.6444	40.0458	40.1405	3.06083	1.61392
	CORO1B	153.792	90.2967	39.5324	44.7721	2.89532	1.53372
	SERPINH1	153.792	88.949	35.9385	50.1757	2.81883	1.4951
	ZHX1	153.792	99.7307	37.9921	54.0353	2.75486	1.46198
	MOB1A	153.792	72.7764	35.9385	47.8599	2.70373	1.43495
	IVNS1ABP	153.792	113.208	49.2871	54.0353	2.58414	1.36969
	ID1	153.792	97.0352	40.0458	57.1231	2.58136	1.36813
	G3BP2	153.792	72.7764	43.6396	44.7721	2.56265	1.35764
	SREBF2	153.792	61.9947	39.019	45.5441	2.55179	1.35151
	ENY2	153.792	130.728	49.8005	67.9301	2.4167	1.27304
	CDC42	153.792	105.122	51.3407	71.7898	2.10276	1.07228
	RTN4	153.792	115.903	58.5284	72.5617	2.05733	1.04077
	AKR1C3	153.792	198.114	119.11	108.071	1.54901	0.631346
	NUPR1	151.742	51.213	16.9424	20.8422	5.37135	2.42529
	SNHG1	151.742	52.5608	27.2106	27.7896	3.71458	1.8932
	LRP5	151.742	87.6013	27.2106	37.8247	3.6802	1.87978
	WWC3	151.742	91.6444	31.8312	37.8247	3.49411	1.80493
	GDI1	151.742	86.2535	32.3447	37.0528	3.42945	1.77798
	TM9SF2	151.742	94.3398	29.7776	43.2283	3.37071	1.75305
	SRP9	151.742	66.0379	30.291	38.5967	3.16137	1.66055
	SERINC3	151.742	48.5176	33.3715	30.8773	3.11693	1.64013
	CPSF6	151.742	90.2967	35.9385	43.2283	3.05732	1.61227
	HIF1A	151.742	88.949	39.019	40.1405	3.04058	1.60435
	THBS1	151.742	70.081	33.8849	41.6844	2.93535	1.55353
	AAMP	151.742	88.949	44.153	43.2283	2.75449	1.46178
	ATP5F1E	151.742	97.0352	44.153	49.4037	2.6591	1.41094
	PRELID3B	151.742	57.9516	32.8581	47.0879	2.62294	1.39118
	SYNGR2	151.742	103.774	44.153	59.4389	2.46656	1.3025
	PSMA5	151.742	97.0352	44.6664	63.2985	2.30424	1.20429
	PGAM1	151.742	109.165	53.9078	61.7547	2.25576	1.17361
	PSMD3	151.742	91.6444	50.8273	58.6669	2.22282	1.15239
	MLPH	151.742	94.3398	56.9882	57.895	2.14201	1.09897
	PRPF4B	149.691	66.0379	26.6972	25.4738	4.13504	2.0479
	GTF2I	149.691	67.3856	24.6435	32.4212	3.80404	1.92753
	TARS1	149.691	90.2967	31.8312	32.4212	3.73507	1.90114
	ADNP	149.691	49.8653	26.1838	29.3335	3.59449	1.84579
	PPP4C	149.691	95.6875	35.9385	37.8247	3.32657	1.73404
	SMARCC1	149.691	90.2967	29.7776	42.4563	3.32237	1.73221
	TRIM44	149.691	101.078	34.3983	43.2283	3.23046	1.69174
	RTN3	149.691	92.9921	41.0726	34.737	3.20122	1.67862
	ABCA3	149.691	80.8627	27.724	45.5441	3.14671	1.65385
	ZC3H18	149.691	90.2967	30.291	46.316	3.13271	1.64741
	C11orf58	149.691	97.0352	36.4519	44.0002	3.06675	1.61671
	SPPL2A	149.691	55.2562	30.291	39.3686	2.94212	1.55686
	SRPRA	149.691	125.337	42.6128	53.2634	2.86858	1.52033
	HDAC1	149.691	84.9058	43.6396	40.9125	2.77458	1.47227
	CPT1A	149.691	72.7764	41.586	38.5967	2.77451	1.47223
	DGKZ	149.691	84.9058	33.3715	51.7195	2.75701	1.4631
	CAP1	149.691	156.335	56.9882	57.1231	2.68182	1.42321
	VAPA	149.691	79.515	44.153	41.6844	2.67023	1.41697
	CRABP2	149.691	94.3398	36.9653	55.5792	2.6369	1.39884
	M6PR	149.691	59.2993	40.5592	42.4563	2.51749	1.33198
	HM13	149.691	105.122	47.7469	54.8073	2.48466	1.31305
	PSMB1	149.691	95.6875	43.1262	58.6669	2.41056	1.26937
	PARK7	149.691	106.469	46.2067	62.5266	2.35586	1.23625
	CORO1C	149.691	119.946	51.3407	65.6143	2.30548	1.20507
	PCNA	149.691	138.814	63.6625	63.2985	2.27239	1.18421
	CCT8	149.691	107.817	55.9614	58.6669	2.24646	1.16765
	PAICS	149.691	118.599	56.9882	62.5266	2.24482	1.1666
	C1QBP	149.691	101.078	59.0418	73.3337	1.89438	0.921725
	ATP9A	147.64	55.2562	19.5095	27.0177	4.36082	2.1246
	UBE4A	147.64	72.7764	27.2106	27.0177	4.06461	2.02312
	ESD	147.64	63.3424	27.724	27.7896	3.80056	1.92621
	AC005332.6	147.64	57.9516	24.1301	30.1054	3.79073	1.92247
	GDE1	147.64	75.4719	29.2642	33.1931	3.57223	1.83683
	CITED2	147.64	84.9058	23.6167	44.0002	3.43917	1.78206
	BRD4	147.64	60.647	28.2374	32.4212	3.43377	1.77979
	TCEAL4	147.64	64.6902	28.7508	33.9651	3.3856	1.75941
	ADGRG1	147.64	75.4719	28.7508	39.3686	3.27531	1.71163
	ECT2	147.64	79.515	27.2106	44.7721	3.15569	1.65796
	BASP1	147.64	136.119	48.2603	44.7721	3.05011	1.60886
	EIF4G3	147.64	70.081	30.291	42.4563	2.99284	1.58152
	ZNF598	147.64	67.3856	33.8849	38.5967	2.96663	1.56883
	PHC2	147.64	148.248	32.3447	67.9301	2.95078	1.5611
	TYMS	147.64	90.2967	38.5055	44.7721	2.85715	1.51458
	KCTD3	147.64	76.8196	33.8849	44.7721	2.85366	1.51281
	TMEM123	147.64	64.6902	39.019	36.2809	2.8198	1.49559
	TBC1D16	147.64	59.2993	39.5324	35.5089	2.75768	1.46345
	BZW2	147.64	79.515	40.0458	42.4563	2.75333	1.46118
	MPRIP	147.64	130.728	46.2067	55.5792	2.73484	1.45146
	STRAP	147.64	128.033	44.153	57.1231	2.722	1.44466
	NUFIP2	147.64	71.4287	39.019	41.6844	2.7145	1.44069
	SOD1	147.64	92.9921	46.2067	43.2283	2.69059	1.42792
	SYAP1	147.64	98.3829	40.5592	50.9476	2.68858	1.42685
	SSR2	147.64	63.3424	27.724	50.9476	2.68182	1.42321
	ATP6V0D1	147.64	102.426	41.586	55.5792	2.57362	1.3638
	TAOK2	147.64	83.5581	37.9921	53.2634	2.53353	1.34115
	UBQLN1	147.64	102.426	39.019	60.2108	2.52008	1.33347
	EIF2S2	147.64	97.0352	46.2067	51.7195	2.49857	1.3211
	CYCS	147.64	90.2967	43.1262	64.0705	2.21963	1.15032
	PUF60	147.64	87.6013	52.3675	57.895	2.13347	1.0932
	UPF1	147.64	76.8196	52.3675	54.0353	2.10953	1.07692
	BRIP1	145.59	88.949	25.157	40.1405	3.59185	1.84473
	OLA1	145.59	78.1673	34.3983	35.5089	3.20077	1.67842
	ALDH18A1	145.59	79.515	33.3715	39.3686	3.09465	1.62977
	XPO5	145.59	72.7764	36.4519	34.737	3.06742	1.61703
	ZNRF1	145.59	68.7333	31.3178	43.2283	2.87504	1.52358
	ZFHX3	145.59	63.3424	36.9653	38.5967	2.76505	1.4673
	SLC7A1	145.59	64.6902	34.3983	44.0002	2.6822	1.42341
	RALY	145.59	66.0379	41.0726	41.6844	2.55722	1.35458
	SKP1	145.59	67.3856	40.0458	44.0002	2.53404	1.34144
	GLYR1	145.59	79.515	37.9921	51.7195	2.5092	1.32723
	APMAP	145.59	101.078	40.5592	57.895	2.50541	1.32505
	DNAJA1	145.59	125.337	60.0686	71.7898	2.05468	1.03891
	MYO1C	145.59	94.3398	63.6625	60.9827	1.9249	0.944784
	ATP8B2	143.539	37.7359	10.7816	24.7019	5.10873	2.35296
	NNT	143.539	60.647	23.1033	28.5615	3.95213	1.98263
	H2AJ	143.539	66.0379	20.5363	35.5089	3.73943	1.90282
	GPRC5A	143.539	86.2535	36.9653	29.3335	3.46602	1.79328
	BIRC6	143.539	75.4719	31.3178	35.5089	3.2773	1.71251
	SEL1L	143.539	56.6039	28.2374	37.0528	3.06544	1.61609
	SCRIB	143.539	98.3829	34.3983	45.5441	3.02621	1.59751
	H3-3A	143.539	97.0352	34.3983	46.316	2.98057	1.57559
	DST	143.539	76.8196	37.4787	39.3686	2.86749	1.51979
	SEPHS2	143.539	92.9921	41.586	40.9125	2.8671	1.51959
	LITAF	143.539	84.9058	39.5324	44.7721	2.70976	1.43817
	CTBP2	143.539	87.6013	35.9385	50.1757	2.68412	1.42445
	IARS2	143.539	103.774	36.9653	55.5792	2.67237	1.41812
	NUTF2	143.539	75.4719	35.4251	53.2634	2.46944	1.30419
	UBE2Z	143.539	102.426	42.6128	61.7547	2.35672	1.23678
	TP53	141.489	56.6039	27.724	17.7545	4.35575	2.12292
	MKRN1	141.489	67.3856	21.0497	27.0177	4.34545	2.11951
	IER2	141.489	51.213	25.157	26.2457	3.74887	1.90645
	ECE1	141.489	91.6444	32.3447	35.5089	3.43583	1.78066
	TERF2IP	141.489	67.3856	24.1301	37.0528	3.41393	1.77143
	CALU	141.489	109.165	35.4251	38.5967	3.38621	1.75967
	FAM91A1	141.489	80.8627	35.4251	37.0528	3.06785	1.61723
	ATRX	141.489	76.8196	33.8849	38.5967	3.01192	1.59068
	NDUFA4	141.489	95.6875	41.0726	37.8247	3.00614	1.58791
	URI1	141.489	80.8627	31.8312	42.4563	2.99312	1.58165
	NCOA4	141.489	75.4719	29.2642	44.0002	2.96134	1.56625
	SHTN1	141.489	84.9058	31.3178	46.316	2.91618	1.54408
	DCTN2	141.489	75.4719	35.9385	45.5441	2.66266	1.41287
	PI4KB	141.489	59.2993	32.3447	43.2283	2.65688	1.40973
	BCL2L1	141.489	101.078	41.0726	51.7195	2.61409	1.38631
	TSPAN13	141.489	84.9058	40.0458	47.8599	2.57543	1.36481
	EIF4A3	141.489	107.817	47.2335	50.1757	2.55937	1.35579
	SNRPD2	141.489	98.3829	47.7469	54.8073	2.33898	1.22588
	MRPS34	141.489	64.6902	43.1262	54.8073	2.1053	1.07402
	CDC42BPG	139.438	114.555	16.429	20.0703	6.95886	2.79885
	MAPK8IP3	139.438	60.647	18.4827	26.2457	4.47334	2.16135
	CHD6	139.438	55.2562	20.0229	28.5615	4.00734	2.00265
	MIDEAS	139.438	52.5608	20.0229	30.8773	3.77207	1.91535
	ZKSCAN1	139.438	48.5176	24.6435	25.4738	3.75031	1.90701
	CCNG1	139.438	55.2562	22.0765	31.6493	3.62385	1.85752
	PLD3	139.438	72.7764	29.7776	31.6493	3.45475	1.78858
	IGF2R	139.438	91.6444	31.3178	39.3686	3.26912	1.7089
	SUN1	139.438	75.4719	32.3447	37.0528	3.0968	1.63078
	PLK2	139.438	102.426	25.157	53.2634	3.0842	1.6249
	MAPK1	139.438	68.7333	34.9117	33.1931	3.05663	1.61194
	RRBP1	139.438	75.4719	36.9653	33.9651	3.02987	1.59926
	LRRFIP1	139.438	86.2535	36.9653	37.8247	3.01767	1.59344
	RALBP1	139.438	82.2104	40.5592	34.737	2.94369	1.55763
	STAU1	139.438	61.9947	24.6435	47.0879	2.80815	1.48962
	COPB1	139.438	64.6902	30.8044	44.0002	2.72882	1.44828
	ST14	139.438	82.2104	35.4251	46.316	2.71159	1.43914
	NECTIN2	139.438	106.469	42.6128	48.6318	2.69504	1.4303
	NPEPPS	139.438	72.7764	34.9117	45.5441	2.63766	1.39926
	NASP	139.438	83.5581	37.4787	47.0879	2.63693	1.39886
	GPAA1	139.438	60.647	36.9653	43.2283	2.49503	1.31906
	PPL	139.438	82.2104	37.4787	53.2634	2.44262	1.28843
	A2M	139.438	71.4287	36.9653	49.4037	2.44146	1.28775
	ATP5MC3	139.438	92.9921	45.1798	56.3511	2.28926	1.19488
	VDAC2	139.438	109.165	53.9078	62.5266	2.13513	1.09433
	PBX1	139.438	59.2993	49.2871	59.4389	1.82788	0.870168
	ESRP1	137.388	59.2993	15.9156	22.3861	5.1352	2.36042
	CEP350	137.388	68.7333	18.9961	30.8773	4.13288	2.04715
	MDM2	137.388	56.6039	21.5631	27.0177	3.99317	1.99754
	SBNO1	137.388	78.1673	30.291	32.4212	3.43721	1.78124
	AGPAT3	137.388	63.3424	21.0497	37.8247	3.40946	1.76954
	PANK3	137.388	82.2104	26.6972	37.8247	3.40346	1.767
	DNAJC5	137.388	60.647	25.6704	33.1931	3.3643	1.75031
	EID1	137.388	84.9058	29.7776	37.0528	3.32623	1.73389
	SRP72	137.388	59.2993	30.8044	30.1054	3.22915	1.69115
	CTSD	137.388	75.4719	35.9385	30.1054	3.223	1.6884
	LAMTOR1	137.388	97.0352	29.7776	43.2283	3.21101	1.68303
	SLC25A1	137.388	83.5581	30.8044	39.3686	3.14858	1.6547
	CXXC5	137.388	64.6902	30.291	33.9651	3.14488	1.65301
	STMN1	137.388	49.8653	27.2106	32.4212	3.14015	1.65084
	GNPTAB	137.388	59.2993	27.2106	37.8247	3.02431	1.59661
	DCAF13	137.388	102.426	32.8581	47.0879	2.9997	1.58482
	POLE3	137.388	78.1673	32.8581	44.0002	2.80458	1.48778
	HTATSF1	137.388	90.2967	40.5592	42.4563	2.74267	1.45558
	H2AZ2	137.388	67.3856	31.8312	46.316	2.62035	1.38976
	TACC1	137.388	52.5608	31.3178	45.5441	2.47129	1.30527
	ABCE1	137.388	95.6875	47.7469	52.4915	2.32521	1.21736
	ADIPOR1	137.388	78.1673	40.0458	57.895	2.20087	1.13807
	PSMD8	137.388	119.946	47.7469	69.474	2.19529	1.13441
	NUDC	137.388	95.6875	42.0994	66.3863	2.14844	1.10329
	NFAT5	137.388	57.9516	64.6893	40.9125	1.84977	0.887348
	VIM	137.388	172.507	97.034	99.5794	1.57616	0.656417
	EIF3L	135.337	56.6039	23.6167	23.158	4.10352	2.03686
	ERBB2	135.337	71.4287	23.6167	27.0177	4.0835	2.02981
	SIKE1	135.337	75.4719	24.1301	32.4212	3.72774	1.8983
	LAMB2	135.337	60.647	23.1033	30.1054	3.68331	1.881
	LONP1	135.337	75.4719	25.157	32.4212	3.66127	1.87234
	PHLDA3	135.337	84.9058	25.6704	37.8247	3.46866	1.79438
	CLNS1A	135.337	91.6444	31.8312	37.8247	3.25861	1.70426
	MCMBP	135.337	86.2535	31.8312	44.0002	2.92215	1.54703
	ANXA7	135.337	83.5581	37.9921	37.0528	2.91685	1.54441
	CACYBP	135.337	64.6902	33.3715	37.0528	2.84032	1.50605
	AMOTL2	135.337	53.9085	32.8581	35.5089	2.76808	1.46889
	YES1	135.337	80.8627	36.4519	42.4563	2.73989	1.45412
	PSMD12	135.337	79.515	34.9117	45.5441	2.67044	1.41708
	GNPNAT1	135.337	72.7764	40.0458	38.5967	2.64633	1.40399
	MED1	135.337	86.2535	34.9117	50.1757	2.60427	1.38088
	COX7C	135.337	90.2967	42.6128	48.6318	2.47284	1.30617
	TALDO1	135.337	114.555	53.9078	60.2108	2.18976	1.13077
	MRPL3	135.337	72.7764	39.019	57.895	2.1474	1.10259
	RRM2	135.337	121.294	56.4748	64.0705	2.12892	1.09012
	TOMM40	135.337	146.901	62.1223	74.8775	2.06013	1.04274
	PAFAH1B1	135.337	86.2535	54.4212	55.5792	2.01445	1.01039
	TXN	135.337	118.599	59.5552	73.3337	1.91089	0.934242
	EIF2AK2	133.286	56.6039	22.5899	20.8422	4.37212	2.12833
	SDC4	133.286	60.647	23.1033	23.158	4.19213	2.06768
	ZC3H14	133.286	68.7333	24.6435	27.0177	3.91047	1.96734
	TMEM183A	133.286	78.1673	29.2642	31.6493	3.47138	1.79551
	MTA1	133.286	82.2104	29.7776	33.1931	3.42217	1.77491
	SF3A1	133.286	72.7764	28.2374	32.4212	3.39709	1.7643
	PFDN5	133.286	92.9921	41.0726	29.3335	3.21391	1.68433
	VARS1	133.286	95.6875	26.6972	45.5441	3.16957	1.66429
	FXR1	133.286	92.9921	25.6704	46.316	3.14335	1.6523
	TOMM70	133.286	60.647	23.1033	38.5967	3.14317	1.65222
	NRBP1	133.286	87.6013	29.7776	43.2283	3.02562	1.59723
	PDPK1	133.286	53.9085	21.0497	40.9125	3.02112	1.59508
	ZFAND3	133.286	71.4287	31.3178	37.0528	2.9942	1.58217
	SSR1	133.286	84.9058	34.9117	39.3686	2.93742	1.55455
	TMEM132A	133.286	82.2104	28.2374	48.6318	2.80342	1.48719
	GIPC1	133.286	83.5581	32.3447	45.5441	2.78403	1.47718
	LMNB1	133.286	88.949	35.9385	46.316	2.7018	1.43392
	WASF2	133.286	66.0379	32.3447	42.4563	2.66473	1.41399
	API5	133.286	86.2535	41.0726	42.4563	2.62831	1.39414
	PDXK	133.286	152.291	50.8273	59.4389	2.5899	1.37289
	MGAT4B	133.286	133.423	41.586	62.5266	2.56175	1.35713
	CBX1	133.286	72.7764	39.019	52.4915	2.2518	1.17108
	PPA1	133.286	95.6875	47.2335	56.3511	2.2105	1.14437
	SLC2A1	133.286	74.1241	42.6128	61.7547	1.98731	0.990818
	AC104793.1	131.236	26.9542	14.3754	13.8948	5.59565	2.48431
	SGSM2	131.236	51.213	20.0229	22.3861	4.30213	2.10505
	BRWD1	131.236	56.6039	17.9693	27.7896	4.10499	2.03738
	SLIT1	131.236	66.0379	21.5631	27.0177	4.06074	2.02174
	SLC39A6	131.236	57.9516	23.1033	24.7019	3.95747	1.98458
	NEBL	131.236	47.1699	17.4558	30.1054	3.75108	1.9073
	KDM5B	131.236	80.8627	24.6435	32.4212	3.71681	1.89406
	DAG1	131.236	71.4287	22.0765	33.1931	3.66683	1.87454
	PACS1	131.236	63.3424	26.6972	28.5615	3.52123	1.81608
	RBM12	131.236	71.4287	24.6435	35.5089	3.36918	1.7524
	SLC35B2	131.236	92.9921	31.8312	34.737	3.36839	1.75206
	PLXNA1	131.236	55.2562	30.8044	24.7019	3.35984	1.74839
	SENP6	131.236	74.1241	26.1838	35.5089	3.32876	1.73498
	USP1	131.236	48.5176	22.5899	32.4212	3.26759	1.70823
	OXCT1	131.236	61.9947	27.2106	32.4212	3.2404	1.69617
	REPIN1	131.236	91.6444	30.291	38.5967	3.23542	1.69395
	DUSP16	131.236	74.1241	28.7508	34.737	3.23464	1.6936
	HMCES	131.236	71.4287	31.3178	33.1931	3.14155	1.65148
	GRK2	131.236	48.5176	27.2106	30.8773	3.09451	1.62971
	IMMT	131.236	90.2967	35.9385	36.2809	3.0675	1.61706
	SLC7A6	131.236	97.0352	30.8044	44.7721	3.0204	1.59474
	NUP107	131.236	82.2104	29.7776	42.4563	2.95493	1.56312
	CHD1	131.236	63.3424	33.3715	33.9651	2.88964	1.53089
	DENR	131.236	64.6902	31.3178	37.0528	2.86565	1.51886
	PCF11	131.236	48.5176	31.8312	31.6493	2.83163	1.50163
	ENAH	131.236	90.2967	38.5055	40.9125	2.78945	1.47998
	CALM3	131.236	97.0352	29.2642	53.2634	2.766	1.4678
	UQCRH	131.236	92.9921	42.0994	40.1405	2.72651	1.44706
	POLD2	131.236	68.7333	35.9385	39.3686	2.65538	1.40892
	SLTM	131.236	66.0379	41.586	33.1931	2.63809	1.39949
	RAF1	131.236	107.817	37.9921	55.5792	2.55477	1.35319
	CPSF7	131.236	70.081	29.7776	51.7195	2.47023	1.30465
	PSMA4	131.236	99.7307	47.7469	50.1757	2.35867	1.23797
	PRELID1	131.236	84.9058	40.5592	54.8073	2.26643	1.18042
	NCOR1	131.236	78.1673	52.3675	43.2283	2.19051	1.13126
	SP3	131.236	87.6013	55.448	73.3337	1.69929	0.764931
	C3orf14	129.185	57.9516	25.157	18.5264	4.28394	2.09894
	CEBPG	129.185	70.081	17.4558	30.8773	4.12277	2.04361
	ASH1L	129.185	75.4719	17.4558	32.4212	4.10323	2.03676
	SLC11A2	129.185	26.9542	17.4558	21.6141	3.99641	1.9987
	PEG10	129.185	92.9921	28.7508	27.0177	3.98393	1.99419
	SELENOI	129.185	70.081	23.1033	29.3335	3.80013	1.92605
	FAR1	129.185	57.9516	25.157	25.4738	3.69611	1.88601
	SEMA3C	129.185	67.3856	30.291	24.7019	3.57448	1.83773
	SUCO	129.185	44.4745	20.5363	30.8773	3.3777	1.75604
	EFCAB14	129.185	79.515	31.8312	32.4212	3.24813	1.69961
	SLC25A29	129.185	72.7764	27.2106	37.0528	3.14272	1.65201
	KMT2B	129.185	63.3424	29.7776	31.6493	3.13426	1.64812
	ANKRD17	129.185	72.7764	31.3178	33.1931	3.13066	1.64647
	LARP4	129.185	71.4287	29.7776	34.737	3.10959	1.63672
	HLTF	129.185	40.4313	23.1033	31.6493	3.09788	1.63128
	TAOK1	129.185	72.7764	33.3715	32.4212	3.06967	1.61808
	DVL3	129.185	63.3424	32.8581	30.8773	3.02074	1.5949
	EI24	129.185	99.7307	36.4519	40.9125	2.95893	1.56508
	CST3	129.185	61.9947	25.6704	40.1405	2.90499	1.53853
	AK2	129.185	106.469	37.9921	46.316	2.79516	1.48293
	UQCRFS1	129.185	115.903	41.0726	47.8599	2.7559	1.46252
	BOD1	129.185	63.3424	29.2642	41.6844	2.71362	1.44022
	ARFGAP2	129.185	67.3856	31.8312	40.9125	2.70224	1.43416
	CD46	129.185	82.2104	36.4519	42.4563	2.67901	1.4217
	DUS1L	129.185	57.9516	31.8312	40.9125	2.57255	1.3632
	PPP1R15B	129.185	60.647	34.9117	40.9125	2.50359	1.324
	CLDN4	129.185	66.0379	29.2642	52.4915	2.38789	1.25573
	ANP32A	129.185	92.9921	42.6128	51.7195	2.35526	1.23589
	ODC1	129.185	118.599	47.2335	62.5266	2.25751	1.17473
	UBE2L3	129.185	70.081	37.4787	54.8073	2.15923	1.11051
	KPNA4	129.185	110.512	59.0418	54.8073	2.1054	1.07409
	PPP6R1	129.185	55.2562	39.5324	55.5792	1.93921	0.955471
	VEGFA	127.135	63.3424	18.9961	16.9825	5.29418	2.40441
	ARL8B	127.135	57.9516	24.6435	17.7545	4.36545	2.12613
	PAN2	127.135	49.8653	20.0229	21.6141	4.25103	2.08781
	SOX4	127.135	61.9947	15.9156	32.4212	3.91274	1.96818
	EIF3J	127.135	53.9085	18.4827	28.5615	3.84837	1.94425
	PNRC2	127.135	49.8653	17.4558	29.3335	3.78292	1.9195
	ADCY6	127.135	53.9085	26.1838	29.3335	3.26103	1.70533
	POGZ	127.135	44.4745	27.2106	25.4738	3.25731	1.70368
	KMT2C	127.135	45.8222	26.6972	27.0177	3.21991	1.68702
	EIF3F	127.135	53.9085	28.7508	29.3335	3.11691	1.64012
	PLOD2	127.135	72.7764	22.0765	42.4563	3.09782	1.63125
	NBEAL2	127.135	82.2104	32.3447	36.2809	3.05054	1.60907
	BMPR2	127.135	49.8653	27.2106	30.8773	3.04711	1.60744
	SYPL1	127.135	55.2562	25.157	37.0528	2.93187	1.55182
	NHP2	127.135	94.3398	32.3447	44.7721	2.87194	1.52202
	SRRT	127.135	109.165	45.6932	37.8247	2.82932	1.50046
	NUP205	127.135	78.1673	36.4519	40.9125	2.6537	1.40801
	UBL3	127.135	37.7359	22.5899	40.9125	2.59629	1.37645
	ATP2C1	127.135	56.6039	32.3447	39.3686	2.56213	1.35734
	TCF25	127.135	64.6902	31.8312	45.5441	2.47915	1.30985
	CLTA	127.135	56.6039	31.8312	45.5441	2.37464	1.24771
	NOP56	127.135	92.9921	49.8005	45.5441	2.30875	1.20711
	FOXM1	127.135	68.7333	35.4251	50.1757	2.28816	1.19419
	NOP58	127.135	67.3856	31.8312	55.5792	2.22537	1.15404
	RNF40	127.135	102.426	49.2871	58.6669	2.12647	1.08846
	CDK2AP1	127.135	82.2104	40.0458	67.9301	1.93881	0.955175
	ZFAND5	127.135	75.4719	72.9038	71.0179	1.40776	0.493398
	AP1M2	125.084	63.3424	18.4827	20.8422	4.79154	2.26049
	HES1	125.084	30.9974	20.5363	13.1229	4.63712	2.21323
	PCK2	125.084	67.3856	19.5095	23.158	4.51093	2.17342
	GIGYF1	125.084	55.2562	17.4558	23.9299	4.35755	2.12352
	AR	125.084	64.6902	28.7508	18.5264	4.01408	2.00507
	SKA2	125.084	52.5608	19.5095	27.0177	3.81809	1.93285
	PITPNA	125.084	60.647	25.6704	23.158	3.80376	1.92743
	HMG20B	125.084	59.2993	20.0229	28.5615	3.79512	1.92414
	SEPHS1	125.084	90.2967	34.3983	22.3861	3.79296	1.92333
	CUL4B	125.084	43.1268	18.4827	26.2457	3.76072	1.91101
	NCBP2	125.084	55.2562	22.5899	27.0177	3.63534	1.86209
	RAPGEF1	125.084	70.081	23.6167	31.6493	3.53138	1.82023
	UBXN1	125.084	35.0405	20.5363	28.5615	3.26134	1.70547
	PTPRJ	125.084	57.9516	24.6435	31.6493	3.2515	1.7011
	CLIP1	125.084	82.2104	27.724	37.0528	3.20014	1.67813
	SEC16A	125.084	74.1241	32.8581	33.1931	3.01597	1.59262
	PPP2R5E	125.084	57.9516	24.1301	37.8247	2.95434	1.56284
	CMTM4	125.084	79.515	31.3178	38.5967	2.92642	1.54914
	IL6ST	125.084	72.7764	39.5324	28.5615	2.9057	1.53889
	RUVBL2	125.084	102.426	35.9385	45.5441	2.79213	1.48137
	METRN	125.084	123.989	39.5324	50.1757	2.77649	1.47326
	PCM1	125.084	49.8653	32.3447	30.8773	2.76723	1.46844
	PRPF40A	125.084	79.515	36.4519	38.5967	2.72622	1.4469
	DDX1	125.084	105.122	43.6396	40.9125	2.72265	1.44501
	SORT1	125.084	79.515	31.3178	44.0002	2.71647	1.44173
	NUP188	125.084	57.9516	28.2374	40.9125	2.64694	1.40433
	CCNB1	125.084	61.9947	26.6972	44.0002	2.64619	1.40392
	MANEAL	125.084	63.3424	23.1033	50.9476	2.54456	1.34741
	RANBP1	125.084	86.2535	39.019	45.5441	2.49918	1.32145
	MCM3AP	125.084	59.2993	34.9117	39.3686	2.48227	1.31166
	DNAJC8	125.084	63.3424	29.7776	46.316	2.47625	1.30816
	PRMT6	125.084	78.1673	34.9117	53.2634	2.30509	1.20482
	ANXA1	125.084	198.114	76.4977	70.2459	2.20247	1.13912
	MAPRE1	125.084	90.2967	51.8541	48.6318	2.14339	1.0999
	PES1	125.084	84.9058	47.2335	50.9476	2.1388	1.0968
	CHMP1A	125.084	98.3829	43.1262	62.5266	2.11511	1.08073
	KHNYN	123.034	48.5176	14.3754	20.0703	4.98034	2.31625
	TRIM8	123.034	56.6039	15.4022	22.3861	4.75379	2.24908
	BTG2	123.034	40.4313	15.4022	19.2983	4.71073	2.23595
	ABHD12	123.034	60.647	16.9424	25.4738	4.33043	2.11451
	PHF10	123.034	48.5176	18.9961	26.2457	3.79188	1.92291
	CCDC6	123.034	72.7764	17.9693	33.9651	3.77034	1.9147
	CIAO1	123.034	75.4719	24.6435	33.9651	3.38697	1.75999
	AP2A1	123.034	83.5581	31.3178	30.1054	3.36341	1.74993
	PLK1	123.034	63.3424	23.1033	33.1931	3.31062	1.7271
	UQCRC1	123.034	67.3856	28.2374	29.3335	3.30756	1.72577
	CREBZF	123.034	110.512	31.8312	39.3686	3.28015	1.71376
	PKN1	123.034	57.9516	27.2106	29.3335	3.20078	1.67843
	MAN1A2	123.034	56.6039	26.1838	30.1054	3.19133	1.67416
	PPP4R3B	123.034	51.213	24.1301	31.6493	3.12385	1.64333
	TRAFD1	123.034	44.4745	16.9424	37.8247	3.05855	1.61285
	HECTD4	123.034	53.9085	28.7508	29.3335	3.0463	1.60706
	C14orf132	123.034	49.8653	28.2374	28.5615	3.04405	1.60599
	MCFD2	123.034	97.0352	35.4251	37.0528	3.03636	1.60234
	GID8	123.034	64.6902	23.1033	39.3686	3.00493	1.58733
	PPP2CA	123.034	105.122	40.5592	37.0528	2.93969	1.55566
	PACS2	123.034	68.7333	28.2374	37.0528	2.93715	1.55442
	ROBO1	123.034	82.2104	33.3715	37.8247	2.8828	1.52747
	SND1	123.034	86.2535	32.8581	41.6844	2.80762	1.48935
	PFKFB3	123.034	109.165	45.6932	40.9125	2.6811	1.42282
	MCRS1	123.034	63.3424	28.7508	42.4563	2.61738	1.38812
	BCCIP	123.034	88.949	34.9117	50.9476	2.46895	1.3039
	PHF3	123.034	66.0379	35.4251	44.7721	2.35758	1.23731
	SUMO1	123.034	60.647	34.9117	44.0002	2.32767	1.21889
	SUPT6H	123.034	106.469	43.1262	56.3511	2.30709	1.20607
	RBM17	123.034	76.8196	31.8312	54.8073	2.30675	1.20586
	TBL1X	123.034	72.7764	37.9921	49.4037	2.2405	1.16382
	THRAP3	123.034	76.8196	39.5324	55.5792	2.10125	1.07125
	PARP1	123.034	79.515	45.6932	50.9476	2.09589	1.06756
	SERPINE1	123.034	181.941	65.2027	91.8601	1.94174	0.957348
	ALDH1L2	120.983	33.6928	13.862	12.3509	5.90075	2.5609
	BAMBI	120.983	66.0379	21.0497	16.9825	4.91743	2.29791
	HELZ	120.983	41.7791	17.9693	19.2983	4.36739	2.12677
	USP24	120.983	67.3856	23.1033	23.9299	4.00501	2.00181
	CAMK2N1	120.983	71.4287	27.2106	23.9299	3.76241	1.91166
	PRKAA1	120.983	53.9085	22.5899	24.7019	3.69814	1.8868
	H1-0	120.983	79.515	32.8581	21.6141	3.68074	1.88
	HNRNPH2	120.983	63.3424	22.5899	30.1054	3.49795	1.80651
	RAP2C	120.983	70.081	23.1033	31.6493	3.48959	1.80306
	SLC5A6	120.983	72.7764	21.0497	34.737	3.47322	1.79627
	ARFGEF2	120.983	55.2562	25.6704	25.4738	3.44593	1.78489
	HDAC7	120.983	52.5608	28.7508	21.6141	3.44573	1.78481
	LY6E	120.983	71.4287	20.0229	36.2809	3.41739	1.77289
	ZC3H7B	120.983	72.7764	24.6435	32.4212	3.39543	1.7636
	GOLGA3	120.983	59.2993	26.6972	31.6493	3.08986	1.62754
	ABHD2	120.983	66.0379	35.4251	25.4738	3.07101	1.61871
	PERP	120.983	84.9058	33.3715	35.5089	2.98908	1.5797
	PURA	120.983	44.4745	26.6972	31.6493	2.83578	1.50375
	DIDO1	120.983	53.9085	31.8312	30.1054	2.82372	1.4976
	GNAI3	120.983	47.1699	30.291	30.1054	2.78416	1.47724
	CAD	120.983	102.426	39.5324	40.9125	2.77717	1.47362
	COX7A2	120.983	47.1699	36.9653	26.2457	2.66018	1.41153
	TSPYL1	120.983	67.3856	27.2106	44.7721	2.61686	1.38784
	KLHDC4	120.983	35.0405	27.724	32.4212	2.59412	1.37524
	SPRYD3	120.983	47.1699	25.6704	40.1405	2.55509	1.35338
	AKAP1	120.983	80.8627	35.4251	44.0002	2.54133	1.34558
	KDM1A	120.983	68.7333	33.3715	42.4563	2.50194	1.32305
	PTTG1IP	120.983	66.0379	29.7776	47.0879	2.43309	1.28279
	NOTCH3	120.983	72.7764	42.6128	37.0528	2.43216	1.28224
	NOP14	120.983	51.213	29.7776	41.6844	2.40962	1.2688
	ITGB5	120.983	107.817	43.6396	52.4915	2.38008	1.25101
	ZNF207	120.983	110.512	53.3944	45.5441	2.33979	1.22638
	MRPS23	120.983	63.3424	33.3715	47.0879	2.29091	1.19592
	NECTIN1	120.983	66.0379	31.3178	50.9476	2.27338	1.18484
	BRI3BP	120.983	60.647	36.9653	46.316	2.18092	1.12494
	HSPH1	120.983	88.949	49.2871	47.0879	2.17828	1.12319
	UQCRC2	120.983	67.3856	33.3715	55.5792	2.11768	1.08248
	UBE2Q1	120.983	64.6902	61.6089	50.1757	1.66099	0.732046
	MID1IP1	118.933	66.0379	18.9961	20.8422	4.64303	2.21507
	GPBP1L1	118.933	48.5176	13.3486	23.9299	4.49187	2.16732
	SNHG19	118.933	60.647	18.9961	22.3861	4.33954	2.11754
	MRTFB	118.933	66.0379	21.5631	23.158	4.13609	2.04827
	RAI1	118.933	70.081	23.1033	27.0177	3.77115	1.915
	PLXNA3	118.933	66.0379	20.5363	30.8773	3.59769	1.84707
	ZCCHC14	118.933	53.9085	18.4827	30.1054	3.55727	1.83077
	ARGLU1	118.933	75.4719	37.4787	17.7545	3.5197	1.81545
	ITGB4	118.933	67.3856	22.0765	32.4212	3.41883	1.7735
	BCAS2	118.933	86.2535	25.6704	38.5967	3.19271	1.67478
	KIAA0513	118.933	52.5608	23.6167	30.1054	3.19223	1.67456
	HSF1	118.933	78.1673	25.157	37.8247	3.12948	1.64592
	MAF1	118.933	53.9085	26.1838	30.8773	3.02905	1.59887
	ZFP36L1	118.933	95.6875	30.291	43.2283	2.91924	1.54559
	GRSF1	118.933	75.4719	33.3715	34.737	2.85434	1.51315
	DICER1	118.933	92.9921	37.9921	36.2809	2.85332	1.51264
	COX6C	118.933	55.2562	22.5899	38.5967	2.84685	1.50936
	ATP6AP2	118.933	67.3856	29.2642	37.0528	2.80951	1.49032
	ITGA3	118.933	82.2104	35.9385	37.0528	2.75571	1.46242
	BOP1	118.933	61.9947	27.724	40.1405	2.66601	1.41468
	IBTK	118.933	45.8222	24.1301	38.5967	2.62654	1.39317
	ATP1B1	118.933	90.2967	42.0994	37.8247	2.61785	1.38838
	ABCC3	118.933	109.165	48.2603	40.1405	2.58026	1.36752
	DAP	118.933	71.4287	32.8581	41.6844	2.55373	1.35261
	BRK1	118.933	95.6875	33.8849	53.2634	2.4627	1.30024
	RPL36AL	118.933	72.7764	33.3715	46.316	2.40576	1.26649
	SAE1	118.933	86.2535	50.8273	43.2283	2.18154	1.12535
	UBE2M	118.933	41.7791	33.3715	45.5441	2.0365	1.02609
	ALDH5A1	116.882	41.7791	17.4558	17.7545	4.5061	2.17188
	TNKS2	116.882	59.2993	15.4022	23.9299	4.47932	2.16328
	APEH	116.882	84.9058	24.6435	20.8422	4.43629	2.14935
	GABPB1-AS1	116.882	37.7359	16.9424	20.0703	4.17743	2.06262
	PCNX1	116.882	49.8653	18.4827	22.3861	4.08007	2.02859
	TSN	116.882	79.515	25.157	25.4738	3.87901	1.95569
	FNBP4	116.882	60.647	24.1301	24.7019	3.63551	1.86216
	RALGAPB	116.882	39.0836	16.429	28.5615	3.46663	1.79353
	LARP4B	116.882	94.3398	33.3715	27.7896	3.45353	1.78807
	STOM	116.882	84.9058	29.7776	30.8773	3.32682	1.73414
	ATP13A3	116.882	66.0379	17.9693	37.0528	3.32448	1.73313
	CDK16	116.882	79.515	16.9424	43.2283	3.264	1.70664
	CMTR1	116.882	57.9516	23.1033	31.6493	3.19316	1.67498
	PRPF3	116.882	66.0379	29.2642	28.5615	3.16329	1.66143
	IQSEC1	116.882	78.1673	27.724	34.737	3.12274	1.64281
	SCYL1	116.882	51.213	26.6972	27.7896	3.08506	1.6253
	PHIP	116.882	51.213	23.1033	32.4212	3.0274	1.59808
	RIC8A	116.882	55.2562	21.5631	35.5089	3.01616	1.59271
	PTEN	116.882	68.7333	36.9653	26.2457	2.93644	1.55407
	EIF3G	116.882	76.8196	32.8581	36.2809	2.80163	1.48627
	PGRMC1	116.882	99.7307	34.9117	44.7721	2.7184	1.44276
	PDXDC1	116.882	57.9516	26.1838	38.5967	2.69886	1.43235
	SDF4	116.882	80.8627	36.4519	37.0528	2.69023	1.42773
	DYNLL1	116.882	68.7333	31.3178	37.8247	2.68453	1.42467
	SUB1	116.882	86.2535	37.9921	39.3686	2.62582	1.39277
	CAPZA1	116.882	67.3856	31.3178	41.6844	2.52414	1.33579
	TIMELESS	116.882	98.3829	31.3178	54.0353	2.52205	1.3346
	ADAM15	116.882	68.7333	32.8581	40.9125	2.51612	1.3312
	NAT10	116.882	49.8653	34.3983	36.2809	2.35922	1.23831
	NARS1	116.882	71.4287	31.8312	49.4037	2.3181	1.21294
	U2SURP	116.882	63.3424	31.8312	53.2634	2.11793	1.08265
	CCAR1	116.882	138.814	50.3139	81.053	1.94643	0.960829
	ALDH3A1	116.882	154.987	82.6586	82.5969	1.64514	0.718213
	CLEC3A	114.831	43.1268	11.8084	8.49127	7.78133	2.96002
	PDCD4	114.831	64.6902	19.5095	13.8948	5.37421	2.42605
	GPT2	114.831	48.5176	15.4022	18.5264	4.81449	2.26738
	CSAD	114.831	36.3882	14.8888	16.9825	4.74469	2.24631
	ACACA	114.831	49.8653	17.9693	21.6141	4.16076	2.05685
	CEBPB	114.831	75.4719	14.3754	31.6493	4.13481	2.04782
	FOXP4	114.831	63.3424	18.4827	27.7896	3.85056	1.94507
	JMJD8	114.831	59.2993	24.1301	24.7019	3.56591	1.83427
	TMEM59	114.831	41.7791	22.5899	21.6141	3.5429	1.82493
	KEAP1	114.831	51.213	23.6167	23.9299	3.49224	1.80415
	GALNT6	114.831	59.2993	23.6167	26.2457	3.49222	1.80414
	SARAF	114.831	52.5608	22.0765	26.2457	3.46408	1.79247
	WWP2	114.831	68.7333	23.6167	30.1054	3.41693	1.7727
	B2M	114.831	67.3856	30.291	24.7019	3.31346	1.72834
	SLC25A36	114.831	45.8222	20.5363	29.3335	3.22146	1.68772
	RTL8C	114.831	45.8222	20.0229	30.8773	3.15625	1.65821
	WIZ	114.831	52.5608	21.5631	31.6493	3.14574	1.6534
	PMEPA1	114.831	70.081	28.2374	31.6493	3.08771	1.62654
	RNF187	114.831	63.3424	26.6972	32.4212	3.01385	1.59161
	ZNF316	114.831	63.3424	20.5363	39.3686	2.97428	1.57254
	SPG7	114.831	64.6902	24.1301	36.2809	2.97167	1.57127
	ABCA2	114.831	66.0379	27.724	33.1931	2.9691	1.57003
	WDR82	114.831	35.0405	19.5095	31.6493	2.92955	1.55068
	ZC3H15	114.831	70.081	28.7508	35.5089	2.87758	1.52486
	CYP1B1	114.831	72.7764	25.6704	40.9125	2.81766	1.4945
	GATAD2A	114.831	76.8196	25.6704	42.4563	2.81316	1.49219
	FBRS	114.831	75.4719	30.291	37.8247	2.79382	1.48224
	YTHDF3	114.831	39.0836	25.157	30.1054	2.78517	1.47777
	TLK2	114.831	49.8653	23.1033	37.0528	2.73782	1.45303
	CTBP1	114.831	78.1673	31.8312	40.1405	2.68159	1.42309
	HINT1	114.831	83.5581	35.4251	39.3686	2.65249	1.40735
	C16orf72	114.831	101.078	37.4787	44.7721	2.62502	1.39233
	IL13RA1	114.831	66.0379	31.3178	40.1405	2.53111	1.33977
	GGA2	114.831	64.6902	27.2106	44.7721	2.49395	1.31844
	VTI1B	114.831	45.8222	23.6167	44.7721	2.34912	1.23212
	ADIPOR2	114.831	63.3424	35.4251	43.2283	2.26531	1.17971
	PPP1R14B	114.831	63.3424	37.9921	40.9125	2.25809	1.1751
	YLPM1	114.831	79.515	32.3447	54.8073	2.22997	1.15703
	ILRUN	114.831	83.5581	47.7469	42.4563	2.19936	1.13709
	HDAC2	114.831	94.3398	41.0726	60.2108	2.06521	1.04629
	CEP170B	114.831	55.2562	34.9117	48.6318	2.03592	1.02568
	TRA2A	114.831	53.9085	46.7201	37.0528	2.01426	1.01025
	PSMC4	114.831	106.469	52.3675	62.5266	1.92613	0.945703
	FN1	114.831	134.771	77.0111	85.6846	1.53417	0.617457
	NUS1	112.781	45.8222	12.8352	21.6141	4.60395	2.20287
	SIPA1L1	112.781	55.2562	19.5095	21.6141	4.08615	2.03074
	KIAA1109	112.781	41.7791	20.0229	19.2983	3.9307	1.97479
	NBR1	112.781	41.7791	20.5363	19.2983	3.88004	1.95607
	CUTA	112.781	39.0836	18.4827	20.8422	3.86179	1.94927
	HIP1R	112.781	72.7764	24.1301	23.9299	3.86095	1.94895
	CDH3	112.781	64.6902	16.9424	30.1054	3.77214	1.91538
	LEO1	112.781	67.3856	20.0229	29.3335	3.65032	1.86802
	FBXO21	112.781	44.4745	21.0497	22.3861	3.62041	1.85615
	IRS1	112.781	68.7333	18.9961	31.6493	3.58403	1.84158
	AACS	112.781	51.213	20.5363	25.4738	3.5643	1.83362
	SIAH2	112.781	52.5608	18.9961	27.7896	3.53402	1.82131
	BHLHE40	112.781	52.5608	15.9156	30.8773	3.53347	1.82109
	PPP2R5C	112.781	51.213	14.8888	31.6493	3.52387	1.81716
	RAB22A	112.781	44.4745	21.0497	23.9299	3.49615	1.80577
	PITPNB	112.781	48.5176	18.4827	30.1054	3.31971	1.73106
	PYCR1	112.781	53.9085	25.157	25.4738	3.29225	1.71908
	GBF1	112.781	56.6039	16.9424	34.737	3.2776	1.71264
	PPFIA1	112.781	63.3424	21.5631	33.9651	3.17178	1.66529
	ZNF146	112.781	106.469	30.291	40.1405	3.11295	1.63828
	SMARCD1	112.781	61.9947	24.1301	32.4212	3.09057	1.62787
	PDPR	112.781	57.9516	24.1301	31.6493	3.06085	1.61393
	HERC1	112.781	48.5176	22.0765	30.8773	3.04602	1.60693
	RNH1	112.781	71.4287	28.2374	32.4212	3.03683	1.60256
	ATP6V1E1	112.781	48.5176	25.157	28.5615	3.00266	1.58624
	ZNF706	112.781	61.9947	23.6167	34.737	2.99511	1.58261
	ZDHHC20	112.781	52.5608	23.1033	32.4212	2.97781	1.57425
	ATMIN	112.781	83.5581	28.7508	38.5967	2.91531	1.54365
	CD81	112.781	101.078	34.3983	40.1405	2.8691	1.5206
	EEF1AKNMT	112.781	41.7791	24.1301	30.1054	2.84979	1.51086
	USP14	112.781	87.6013	33.3715	37.0528	2.84536	1.50861
	RAB11A	112.781	61.9947	29.7776	31.6493	2.84526	1.50856
	MAP2K2	112.781	66.0379	25.157	37.8247	2.83922	1.50549
	DOCK5	112.781	60.647	33.3715	27.7896	2.83559	1.50365
	NAA15	112.781	83.5581	25.6704	44.0002	2.81811	1.49473
	GOLPH3	112.781	68.7333	28.7508	37.0528	2.75842	1.46384
	SH3BP5	112.781	83.5581	27.2106	44.0002	2.75715	1.46318
	AFG3L2	112.781	90.2967	28.2374	47.8599	2.66866	1.41611
	STAT3	112.781	68.7333	29.2642	40.9125	2.58653	1.37102
	CDIPT	112.781	79.515	29.2642	46.316	2.54426	1.34725
	EDC4	112.781	75.4719	29.2642	45.5441	2.51647	1.3314
	NUP98	112.781	53.9085	35.4251	30.8773	2.51408	1.33003
	CRIM1	112.781	94.3398	40.5592	44.0002	2.44941	1.29244
	PABPC1L	110.73	43.1268	14.8888	14.6667	5.20569	2.38009
	SLC7A2	110.73	48.5176	14.8888	20.0703	4.55527	2.18754
	SLC6A14	110.73	37.7359	11.8084	20.8422	4.54713	2.18496
	UTRN	110.73	61.9947	23.1033	15.4387	4.48148	2.16397
	PNISR	110.73	37.7359	17.9693	17.7545	4.15596	2.05518
	LRPAP1	110.73	67.3856	18.9961	25.4738	4.00532	2.00192
	PLXNB1	110.73	49.8653	18.9961	21.6141	3.95456	1.98352
	POLR2E	110.73	47.1699	20.5363	21.6141	3.74611	1.90539
	IFITM3	110.73	45.8222	17.4558	25.4738	3.64672	1.8666
	DDB2	110.73	43.1268	15.9156	27.7896	3.52034	1.81571
	NADSYN1	110.73	61.9947	22.5899	30.1054	3.27781	1.71273
	C12orf49	110.73	75.4719	26.1838	32.4212	3.17724	1.66778
	ARPC3	110.73	110.512	34.3983	35.5089	3.1648	1.66212
	RHBDF1	110.73	37.7359	17.9693	29.3335	3.13864	1.65014
	ELOVL5	110.73	67.3856	26.6972	31.6493	3.05273	1.6101
	GPBP1	110.73	55.2562	26.6972	27.7896	3.04636	1.60709
	PPP1CB	110.73	56.6039	20.5363	34.737	3.0274	1.59808
	TMEM259	110.73	51.213	20.0229	33.9651	2.99962	1.58478
	EP300	110.73	41.7791	22.5899	28.5615	2.98153	1.57605
	SCYL2	110.73	43.1268	23.1033	31.6493	2.81004	1.49059
	CRIP2	110.73	45.8222	25.6704	30.8773	2.7685	1.46911
	C6orf89	110.73	61.9947	25.6704	37.0528	2.75377	1.46141
	SLC35A4	110.73	53.9085	24.1301	37.0528	2.69093	1.4281
	PNMA1	110.73	84.9058	27.2106	45.5441	2.68898	1.42706
	UTP4	110.73	76.8196	32.8581	37.8247	2.6534	1.40784
	GPS1	110.73	84.9058	37.4787	36.2809	2.65235	1.40727
	DNM1L	110.73	56.6039	25.6704	37.8247	2.63539	1.39802
	NOL11	110.73	76.8196	31.3178	41.6844	2.5691	1.36126
	DCTN5	110.73	67.3856	29.7776	40.1405	2.54749	1.34908
	MRPS16	110.73	61.9947	31.8312	36.2809	2.53589	1.34249
	DDX18	110.73	67.3856	30.8044	44.0002	2.38108	1.25162
	TRPS1	110.73	68.7333	39.5324	40.1405	2.25251	1.17153
	POLDIP2	110.73	95.6875	39.019	55.5792	2.18205	1.12568
	SSB	110.73	86.2535	44.153	47.8599	2.14083	1.09817
	PLEKHB2	110.73	60.647	39.5324	46.316	1.99628	0.997314
	PSMD14	110.73	92.9921	50.3139	59.4389	1.85619	0.892347
	NDFIP1	108.68	53.9085	16.9424	21.6141	4.21687	2.07617
	VIRMA	108.68	36.3882	14.8888	20.0703	4.14965	2.05299
	C16orf58	108.68	63.3424	18.9961	26.2457	3.80228	1.92687
	CCDC170	108.68	41.7791	18.9961	20.8422	3.77674	1.91714
	CARM1	108.68	74.1241	20.0229	29.3335	3.70376	1.88899
	RNF114	108.68	75.4719	16.429	34.737	3.5991	1.84764
	ARHGAP21	108.68	47.1699	21.0497	23.158	3.5254	1.81779
	PTOV1	108.68	70.081	20.0229	31.6493	3.45952	1.79057
	ANKRD28	108.68	53.9085	20.5363	27.7896	3.36441	1.75035
	NF1	108.68	72.7764	25.157	30.8773	3.23831	1.69524
	IRF2BPL	108.68	52.5608	18.4827	31.6493	3.21632	1.68541
	PFDN4	108.68	74.1241	26.1838	30.8773	3.20365	1.67972
	GPR107	108.68	56.6039	20.5363	31.6493	3.16723	1.66322
	RAB14	108.68	87.6013	36.4519	30.8773	2.91524	1.54362
	SPIN1	108.68	66.0379	26.1838	34.737	2.86795	1.52002
	ELOB	108.68	86.2535	29.2642	39.3686	2.84023	1.50601
	CCAR2	108.68	86.2535	32.8581	36.2809	2.81944	1.49541
	HSD17B4	108.68	68.7333	38.5055	24.7019	2.80684	1.48895
	SUGP2	108.68	51.213	25.157	33.9651	2.70445	1.43534
	TCF3	108.68	74.1241	29.2642	38.5967	2.6938	1.42964
	NOB1	108.68	72.7764	32.8581	35.5089	2.65415	1.40825
	CHPF	108.68	90.2967	29.7776	46.316	2.61489	1.38675
	ADRM1	108.68	63.3424	34.3983	31.6493	2.60452	1.38102
	DERL1	108.68	94.3398	36.4519	41.6844	2.59827	1.37755
	MRPS25	108.68	68.7333	25.6704	43.2283	2.57499	1.36457
	HTT	108.68	60.647	28.2374	37.8247	2.56314	1.35791
	MECP2	108.68	49.8653	31.8312	30.1054	2.55979	1.35603
	TAX1BP1	108.68	72.7764	35.4251	35.5089	2.5581	1.35507
	KCTD15	108.68	53.9085	26.6972	37.0528	2.5504	1.35073
	NUP153	108.68	74.1241	36.9653	35.5089	2.52233	1.33476
	KDM3B	108.68	63.3424	35.9385	32.4212	2.51643	1.33138
	FYTTD1	108.68	41.7791	27.2106	33.1931	2.49089	1.31666
	SDHC	108.68	41.7791	27.2106	33.1931	2.49089	1.31666
	PSMD1	108.68	128.033	48.2603	48.6318	2.44305	1.28868
	YKT6	108.68	52.5608	30.291	36.2809	2.42205	1.27623
	PRMT5	108.68	83.5581	35.4251	44.7721	2.39706	1.26127
	ARHGAP5	108.68	67.3856	32.8581	47.0879	2.2023	1.13901
	MSL1	108.68	83.5581	50.8273	38.5967	2.14974	1.10416
	SNX5	108.68	71.4287	40.5592	50.1757	1.985	0.989138
	PTPA	108.68	61.9947	36.4519	50.1757	1.97021	0.978349
	VCL	108.68	90.2967	55.9614	47.8599	1.91653	0.938496
	ALYREF	108.68	84.9058	54.4212	53.2634	1.79771	0.84616
	PFKP	108.68	140.162	53.9078	87.2285	1.76313	0.81814
	CPLANE1	106.629	21.5634	10.2681	10.8071	6.08262	2.60469
	PPP1R3C	106.629	39.0836	13.862	12.3509	5.55882	2.47478
	PTPRU	106.629	55.2562	20.5363	20.0703	3.98668	1.99519
	IK	106.629	66.0379	23.6167	21.6141	3.81746	1.93261
	CREG1	106.629	41.7791	13.3486	26.2457	3.74822	1.90621
	RNF130	106.629	64.6902	19.5095	27.7896	3.62204	1.8568
	ADCY9	106.629	41.7791	15.9156	25.4738	3.58566	1.84224
	MAN2C1	106.629	45.8222	16.429	26.2457	3.5724	1.83689
	STX16	106.629	57.9516	20.5363	26.2457	3.51804	1.81477
	ESYT2	106.629	78.1673	22.0765	30.8773	3.48977	1.80313
	DIP2B	106.629	74.1241	22.0765	30.1054	3.46391	1.7924
	MDH1	106.629	82.2104	25.6704	31.6493	3.2945	1.72006
	AFDN	106.629	57.9516	19.5095	33.1931	3.12282	1.64285
	LTA4H	106.629	64.6902	24.6435	30.8773	3.08567	1.62559
	CHD8	106.629	51.213	23.1033	29.3335	3.01014	1.58983
	SSR3	106.629	57.9516	33.8849	21.6141	2.96547	1.56826
	CLPTM1	106.629	67.3856	24.1301	35.5089	2.9178	1.54488
	EPHB4	106.629	49.8653	26.6972	27.7896	2.87216	1.52213
	XPC	106.629	35.0405	24.6435	24.7019	2.87098	1.52154
	NEDD4	106.629	52.5608	23.1033	34.737	2.75223	1.4606
	DCTPP1	106.629	82.2104	32.3447	36.2809	2.75174	1.46034
	MAP3K11	106.629	70.081	31.8312	33.9651	2.68572	1.42531
	KIF22	106.629	91.6444	34.3983	40.9125	2.63274	1.39656
	NPTN	106.629	45.8222	28.7508	29.3335	2.62466	1.39213
	UHMK1	106.629	55.2562	21.5631	40.1405	2.6236	1.39155
	C7orf50	106.629	71.4287	34.9117	34.737	2.55651	1.35418
	SEC13	106.629	79.515	40.5592	32.4212	2.55061	1.35084
	SBF1	106.629	39.0836	28.2374	29.3335	2.53102	1.33972
	NUP160	106.629	60.647	34.9117	31.6493	2.51313	1.32948
	UBE2A	106.629	59.2993	27.724	38.5967	2.50191	1.32303
	MLXIP	106.629	74.1241	32.3447	40.1405	2.49366	1.31826
	NRCAM	106.629	57.9516	32.8581	33.1931	2.49172	1.31714
	ATP1B3	106.629	57.9516	27.724	39.3686	2.45304	1.29457
	CENPF	106.629	68.7333	36.9653	34.737	2.4457	1.29025
	ERBIN	106.629	45.8222	24.1301	39.3686	2.40086	1.26355
	SREBF1	106.629	63.3424	30.291	43.2283	2.31193	1.2091
	DNAJA2	106.629	49.8653	32.3447	39.3686	2.18223	1.1258
	GPI	106.629	138.814	60.5821	54.0353	2.14142	1.09857
	NOC2L	106.629	64.6902	32.8581	47.8599	2.12244	1.08573
	AKR1B1	106.629	99.7307	53.3944	53.2634	1.93479	0.952174
	RBM14	106.629	75.4719	50.3139	51.7195	1.78472	0.835697
	PGP	106.629	82.2104	41.586	67.9301	1.72431	0.786018
	ZNF703	104.579	36.3882	12.3218	16.9825	4.81045	2.26617
	SELENBP1	104.579	21.5634	16.429	13.8948	4.15983	2.05653
	CGGBP1	104.579	59.2993	18.9961	22.3861	3.96011	1.98554
	ADGRL1	104.579	37.7359	14.3754	22.3861	3.8713	1.95282
	TBC1D5	104.579	44.4745	14.8888	23.9299	3.83972	1.941
	UHRF1BP1	104.579	48.5176	17.9693	22.3861	3.79371	1.92361
	PARP14	104.579	40.4313	18.9961	19.2983	3.78672	1.92095
	ADAM10	104.579	71.4287	23.6167	25.4738	3.58536	1.84212
	RETREG2	104.579	39.0836	18.9961	22.3861	3.4716	1.7956
	ZNF740	104.579	48.5176	17.4558	27.0177	3.44241	1.78342
	WWP1	104.579	67.3856	26.1838	25.4738	3.32893	1.73506
	GAA	104.579	41.7791	22.0765	22.3861	3.29171	1.71884
	ELK4	104.579	37.7359	17.4558	26.2457	3.25651	1.70333
	ARIH1	104.579	55.2562	22.5899	27.0177	3.22198	1.68795
	ACP1	104.579	48.5176	20.5363	28.5615	3.11819	1.64071
	CUEDC1	104.579	41.7791	23.6167	24.7019	3.02901	1.59885
	EMC1	104.579	48.5176	22.0765	29.3335	2.97795	1.57432
	REV3L	104.579	39.0836	22.0765	26.2457	2.97301	1.57192
	MLST8	104.579	75.4719	23.1033	39.3686	2.8821	1.52712
	MAGT1	104.579	41.7791	22.0765	29.3335	2.84687	1.50938
	TXLNA	104.579	55.2562	24.1301	33.1931	2.78831	1.47939
	SNX3	104.579	61.9947	29.7776	30.8773	2.74625	1.45746
	EPS8	104.579	47.1699	25.157	30.1054	2.74597	1.45731
	PCNP	104.579	64.6902	31.3178	31.6493	2.68821	1.42665
	NDUFS2	104.579	66.0379	27.2106	37.0528	2.65496	1.40869
	RNF11	104.579	91.6444	28.2374	47.0879	2.60501	1.38129
	SLK	104.579	48.5176	24.6435	34.737	2.57822	1.36638
	PDHA1	104.579	74.1241	31.8312	37.8247	2.56551	1.35924
	SEC62	104.579	78.1673	27.2106	44.7721	2.53875	1.34412
	PSMC2	104.579	44.4745	31.3178	28.5615	2.48922	1.3157
	CYB5B	104.579	78.1673	35.9385	39.3686	2.42668	1.27898
	DDX46	104.579	107.817	49.8005	39.3686	2.38194	1.25214
	CNDP2	104.579	68.7333	31.3178	41.6844	2.37406	1.24736
	SMS	104.579	72.7764	33.8849	40.9125	2.37114	1.24558
	RAP1B	104.579	68.7333	30.8044	42.4563	2.36569	1.24226
	OSBPL8	104.579	80.8627	27.724	50.9476	2.35716	1.23705
	GTPBP4	104.579	75.4719	30.291	48.6318	2.28135	1.18989
	OAT	104.579	70.081	27.2106	49.4037	2.27973	1.18886
	SSR4	104.579	59.2993	31.3178	42.4563	2.22135	1.15143
	TUBA1A	104.579	48.5176	26.1838	46.316	2.11168	1.07839
	CAPN2	104.579	83.5581	45.1798	46.316	2.05623	1.04
	CCNL1	104.579	79.515	43.6396	46.316	2.04649	1.03315
	PSMA7	104.579	64.6902	39.5324	56.3511	1.76536	0.819962
	TRAK2	102.528	86.2535	9.24133	23.9299	5.69112	2.50871
	CHD2	102.528	68.7333	11.8084	26.2457	4.50047	2.17008
	MBD6	102.528	41.7791	12.3218	20.8422	4.35132	2.12145
	PGM3	102.528	32.3451	15.4022	17.7545	4.06775	2.02423
	TOM1L1	102.528	48.5176	17.9693	20.0703	3.97076	1.98941
	FOXK2	102.528	57.9516	22.0765	18.5264	3.95242	1.98274
	CPNE1	102.528	66.0379	18.4827	24.7019	3.90339	1.96473
	SBDS	102.528	63.3424	24.1301	18.5264	3.88851	1.95922
	KIAA0319L	102.528	53.9085	16.429	23.9299	3.87613	1.95462
	SNHG8	102.528	48.5176	20.0229	19.2983	3.84133	1.94161
	TM7SF3	102.528	43.1268	12.8352	26.2457	3.72701	1.89802
	SLC35F5	102.528	45.8222	17.4558	23.9299	3.58457	1.8418
	SPTLC2	102.528	45.8222	22.5899	21.6141	3.35603	1.74676
	AGAP3	102.528	86.2535	21.5631	34.737	3.35313	1.74551
	LONP2	102.528	61.9947	28.2374	20.8422	3.35216	1.74509
	SGPL1	102.528	52.5608	21.5631	27.0177	3.19239	1.67464
	HMGCR	102.528	55.2562	19.5095	30.1054	3.18018	1.66911
	TLE3	102.528	40.4313	15.9156	29.3335	3.15939	1.65965
	TET3	102.528	37.7359	22.0765	23.158	3.10082	1.63265
	PPP1R9B	102.528	51.213	24.1301	26.2457	3.05188	1.6097
	DNAJB6	102.528	49.8653	21.0497	29.3335	3.02469	1.59679
	ASCC3	102.528	41.7791	24.6435	23.158	3.01888	1.59401
	SNHG5	102.528	40.4313	18.9961	28.5615	3.00603	1.58786
	LTBR	102.528	57.9516	23.1033	31.6493	2.931	1.55139
	FDFT1	102.528	78.1673	26.6972	36.2809	2.86918	1.52064
	JADE2	102.528	43.1268	22.5899	29.3335	2.80519	1.4881
	MEPCE	102.528	56.6039	30.8044	26.2457	2.78933	1.47992
	NRP1	102.528	78.1673	36.4519	29.3335	2.74674	1.45772
	MLLT1	102.528	40.4313	24.6435	27.7896	2.72651	1.44705
	FAM20B	102.528	64.6902	26.1838	35.5089	2.7105	1.43856
	RACGAP1	102.528	59.2993	29.7776	30.1054	2.70239	1.43424
	SRRM1	102.528	76.8196	28.7508	40.1405	2.60334	1.38036
	ROCK2	102.528	49.8653	25.157	33.9651	2.57761	1.36603
	AIFM1	102.528	70.081	26.6972	40.9125	2.55302	1.35221
	SHISA5	102.528	71.4287	27.2106	44.7721	2.41665	1.27301
	JPT1	102.528	83.5581	33.3715	44.0002	2.40509	1.26609
	TEAD1	102.528	82.2104	43.1262	38.5967	2.26055	1.17667
	TCOF1	102.528	92.9921	33.8849	54.0353	2.22384	1.15305
	EIF3M	102.528	94.3398	39.019	51.7195	2.16962	1.11744
	PPM1K	100.478	33.6928	12.8352	6.9474	6.78224	2.76176
	CD55	100.478	32.3451	14.8888	10.8071	5.16902	2.36989
	OTUD4	100.478	49.8653	13.3486	20.8422	4.39717	2.13658
	PARVA	100.478	53.9085	16.429	20.8422	4.14223	2.05041
	KAT6A	100.478	36.3882	16.9424	17.7545	3.94461	1.97988
	VPS13D	100.478	36.3882	14.8888	20.8422	3.83045	1.93751
	LRATD1	100.478	43.1268	19.5095	20.0703	3.62823	1.85926
	GTF3C4	100.478	59.2993	20.5363	26.2457	3.41535	1.77203
	TATDN1	100.478	33.6928	15.4022	23.9299	3.41121	1.77028
	IDH2	100.478	90.2967	26.6972	29.3335	3.40482	1.76758
	MAP7D1	100.478	70.081	26.1838	23.9299	3.40343	1.76699
	OTUB1	100.478	53.9085	19.5095	26.2457	3.37417	1.75453
	IER5	100.478	52.5608	23.1033	22.3861	3.36426	1.75029
	HERC2	100.478	56.6039	19.5095	30.1054	3.16601	1.66267
	STK26	100.478	61.9947	20.5363	30.8773	3.1601	1.65997
	RABGAP1	100.478	43.1268	16.9424	28.5615	3.15586	1.65803
	PAF1	100.478	49.8653	21.5631	26.2457	3.14467	1.65291
	SLC12A2	100.478	45.8222	20.5363	26.2457	3.12726	1.6449
	RBCK1	100.478	49.8653	20.5363	27.7896	3.11102	1.63739
	FAM168A	100.478	55.2562	21.0497	29.3335	3.09099	1.62807
	TUBGCP2	100.478	76.8196	26.6972	31.6493	3.0387	1.60345
	TAF1C	100.478	39.0836	15.4022	30.8773	3.01561	1.59245
	DGCR2	100.478	71.4287	27.2106	30.1054	2.99927	1.58461
	CASC3	100.478	32.3451	25.157	20.0703	2.93678	1.55424
	DAP3	100.478	70.081	29.7776	28.5615	2.92357	1.54773
	HIPK2	100.478	86.2535	24.6435	39.3686	2.91712	1.54454
	CD151	100.478	98.3829	29.7776	38.5967	2.90841	1.54023
	EPS15	100.478	35.0405	24.1301	23.158	2.86579	1.51893
	PPP1R12A	100.478	49.8653	20.5363	33.1931	2.79815	1.48447
	PTGES2	100.478	76.8196	28.2374	35.5089	2.78129	1.47575
	RPL22	100.478	45.8222	25.6704	27.0177	2.77672	1.47338
	IMPAD1	100.478	94.3398	33.3715	37.0528	2.76634	1.46798
	CTDSP1	100.478	57.9516	22.0765	36.2809	2.71481	1.44085
	ATXN1L	100.478	68.7333	28.7508	33.9651	2.69805	1.43192
	COX7A2L	100.478	51.213	25.157	31.6493	2.67032	1.41701
	PIP5K1A	100.478	36.3882	19.5095	33.1931	2.59694	1.37681
	CLTB	100.478	64.6902	25.6704	40.1405	2.50973	1.32753
	FUBP3	100.478	75.4719	29.2642	40.9125	2.50723	1.3261
	RARG	100.478	67.3856	27.2106	40.9125	2.46412	1.30107
	AMZ2	100.478	51.213	27.2106	34.737	2.44869	1.29201
	LMAN2	100.478	55.2562	29.2642	37.0528	2.34832	1.23163
	AKT1S1	100.478	41.7791	28.7508	33.1931	2.29654	1.19946
	ICMT	100.478	72.7764	35.4251	43.2283	2.20275	1.13931
	PRDX5	100.478	55.2562	34.3983	38.5967	2.13349	1.09321
	MGST1	100.478	79.515	43.6396	50.1757	1.91858	0.940042
	FKBP5	100.478	55.2562	37.9921	43.2283	1.91742	0.939167
	PSPC1	98.427	41.7791	13.3486	9.2632	6.20057	2.6324
	RMND1	98.427	24.2588	9.75474	10.0351	6.19942	2.63213
	ARMCX3	98.427	32.3451	9.75474	13.1229	5.71616	2.51505
	MRPL49	98.427	68.7333	20.0229	22.3861	3.94163	1.97879
	USO1	98.427	56.6039	16.429	23.9299	3.8413	1.94159
	MGA	98.427	55.2562	20.0229	20.0703	3.83315	1.93853
	SRPK1	98.427	83.5581	19.5095	29.3335	3.72592	1.8976
	CDC73	98.427	36.3882	14.3754	22.3861	3.6673	1.87472
	CCDC85C	98.427	44.4745	18.9961	20.0703	3.65792	1.87102
	DBNL	98.427	63.3424	15.9156	30.8773	3.45713	1.78958
	MTHFD1L	98.427	45.8222	18.9961	23.9299	3.36041	1.74864
	PPM1H	98.427	59.2993	19.5095	30.8773	3.13031	1.6463
	SYMPK	98.427	53.9085	27.724	22.3861	3.04002	1.60408
	RAB18	98.427	55.2562	26.6972	25.4738	2.94576	1.55864
	STOML2	98.427	55.2562	25.157	28.5615	2.8609	1.51647
	TSPAN3	98.427	59.2993	26.1838	30.8773	2.76416	1.46684
	SRP68	98.427	49.8653	20.5363	33.1931	2.75998	1.46466
	ZNF512B	98.427	44.4745	24.1301	27.7896	2.75235	1.46067
	RBM10	98.427	55.2562	23.1033	33.9651	2.69296	1.42919
	FANCI	98.427	75.4719	30.8044	34.737	2.65327	1.40777
	PTPN1	98.427	51.213	22.5899	33.9651	2.64592	1.40377
	ATXN7L3	98.427	70.081	29.7776	35.5089	2.58105	1.36796
	CNIH1	98.427	66.0379	30.8044	33.1931	2.56986	1.36169
	MYBBP1A	98.427	63.3424	23.1033	40.1405	2.55787	1.35494
	CHMP4B	98.427	59.2993	29.2642	33.1931	2.52534	1.33648
	KCTD20	98.427	45.8222	26.6972	30.8773	2.50543	1.32506
	PSMC6	98.427	74.1241	29.2642	41.6844	2.43206	1.28218
	SNX17	98.427	97.0352	30.291	50.1757	2.42911	1.28043
	DNAJB1	98.427	80.8627	32.3447	41.6844	2.42188	1.27613
	KPNA3	98.427	43.1268	25.6704	33.1931	2.40478	1.2659
	RAB2A	98.427	60.647	32.8581	34.737	2.35334	1.23471
	NDUFS1	98.427	52.5608	29.2642	35.5089	2.33102	1.22096
	PRDX3	98.427	67.3856	32.3447	39.3686	2.31216	1.20924
	MSH6	98.427	88.949	42.6128	48.6318	2.05356	1.03812
	PAIP2	98.427	70.081	37.9921	46.316	1.99872	0.999073
	EFTUD2	98.427	71.4287	37.4787	48.6318	1.97253	0.980048
	PAXBP1	98.427	59.2993	56.4748	44.7721	1.55784	0.639545
	DNAJC21	96.3764	37.7359	12.3218	13.8948	5.11555	2.35489
	DCTN4	96.3764	56.6039	13.3486	19.2983	4.6859	2.22833
	CGN	96.3764	40.4313	13.862	15.4387	4.6691	2.22314
	ELF1	96.3764	47.1699	15.9156	19.2983	4.0764	2.0273
	WDR59	96.3764	36.3882	11.8084	20.8422	4.06623	2.02369
	PRR11	96.3764	48.5176	17.9693	20.8422	3.73328	1.90044
	FBP1	96.3764	47.1699	14.3754	24.7019	3.6734	1.87711
	VPS13B	96.3764	33.6928	11.8084	23.9299	3.63949	1.86374
	EMD	96.3764	76.8196	16.429	31.6493	3.60237	1.84895
	MATN2	96.3764	49.8653	16.9424	23.9299	3.57801	1.83916
	OSTC	96.3764	40.4313	18.9961	20.0703	3.50193	1.80815
	TMEM127	96.3764	56.6039	21.0497	23.158	3.46049	1.79098
	PHC3	96.3764	43.1268	19.5095	20.8422	3.45718	1.7896
	ZC3H13	96.3764	53.9085	15.9156	27.7896	3.4386	1.78182
	EXOC5	96.3764	60.647	20.0229	26.2457	3.39373	1.76287
	GOLGA2	96.3764	57.9516	22.5899	23.158	3.37344	1.75422
	PWWP2B	96.3764	48.5176	20.0229	23.9299	3.29658	1.72097
	CDC27	96.3764	51.213	23.6167	21.6141	3.26302	1.70621
	PTPRK	96.3764	53.9085	21.5631	26.2457	3.14345	1.65235
	JUND	96.3764	29.6497	16.429	23.9299	3.12263	1.64276
	YTHDF1	96.3764	48.5176	19.5095	27.0177	3.11418	1.63885
	PSIP1	96.3764	71.4287	32.8581	21.6141	3.08056	1.62319
	SAMD4B	96.3764	56.6039	25.157	25.4738	3.02149	1.59526
	RRP1	96.3764	35.0405	20.5363	23.158	3.00764	1.58863
	RFX5	96.3764	40.4313	16.9424	28.5615	3.0065	1.58809
	OCRL	96.3764	56.6039	21.5631	29.3335	3.00571	1.58771
	YTHDF2	96.3764	48.5176	20.0229	28.5615	2.98231	1.57643
	OSGIN2	96.3764	63.3424	22.0765	32.4212	2.93074	1.55127
	CAST	96.3764	86.2535	30.8044	31.6493	2.92425	1.54806
	ATP6V0E1	96.3764	55.2562	20.5363	31.6493	2.90564	1.53886
	TBL3	96.3764	48.5176	21.5631	28.5615	2.89067	1.53141
	MED29	96.3764	32.3451	24.6435	20.0703	2.87879	1.52546
	SLC35F6	96.3764	52.5608	24.1301	28.5615	2.82658	1.49906
	FBRSL1	96.3764	36.3882	16.9424	30.1054	2.82191	1.49667
	ABL1	96.3764	44.4745	24.1301	26.2457	2.796	1.48336
	IDI1	96.3764	75.4719	30.291	31.6493	2.77442	1.47218
	GTF3A	96.3764	57.9516	22.5899	33.1931	2.76657	1.4681
	ANO6	96.3764	68.7333	25.6704	35.5089	2.69878	1.43231
	CPSF2	96.3764	52.5608	26.1838	29.3335	2.68272	1.4237
	PPP4R3A	96.3764	84.9058	33.8849	33.9651	2.67181	1.41782
	TNKS1BP1	96.3764	75.4719	25.6704	39.3686	2.64224	1.40176
	MPHOSPH8	96.3764	36.3882	17.9693	33.1931	2.59497	1.37572
	FDPS	96.3764	83.5581	34.3983	35.5089	2.5739	1.36396
	RAB35	96.3764	60.647	29.7776	31.6493	2.55627	1.35404
	ATP13A1	96.3764	51.213	28.7508	30.1054	2.50763	1.32632
	SEC14L1	96.3764	43.1268	23.1033	33.1931	2.47801	1.30918
	SAPCD2	96.3764	72.7764	32.3447	36.2809	2.46487	1.30151
	LSM4	96.3764	71.4287	33.3715	37.8247	2.35694	1.23691
	RANGAP1	96.3764	68.7333	31.8312	38.5967	2.34438	1.22921
	NAMPT	96.3764	74.1241	33.3715	40.9125	2.29525	1.19865
	SDC1	96.3764	102.426	37.9921	50.1757	2.25482	1.17301
	ACSL3	96.3764	74.1241	37.9921	37.8247	2.24885	1.16919
	PKMYT1	96.3764	67.3856	29.2642	44.0002	2.23522	1.16042
	AUP1	96.3764	67.3856	36.4519	43.2283	2.05524	1.03931
	ATF7IP	94.3258	29.6497	14.3754	8.49127	5.42167	2.43874
	PLEKHF2	94.3258	36.3882	12.3218	12.3509	5.29792	2.40543
	VPS13C	94.3258	47.1699	12.8352	16.2106	4.87147	2.28436
	FAM102B	94.3258	32.3451	11.295	16.2106	4.60528	2.20329
	SETD2	94.3258	40.4313	16.9424	13.8948	4.36995	2.12762
	RAB15	94.3258	53.9085	14.8888	19.2983	4.33597	2.11635
	EEA1	94.3258	45.8222	17.9693	15.4387	4.19505	2.06869
	NCOA6	94.3258	35.0405	16.429	17.7545	3.78447	1.92009
	CSNK2A2	94.3258	71.4287	18.9961	27.0177	3.60228	1.84891
	NT5C2	94.3258	97.0352	29.7776	23.9299	3.56302	1.8331
	CACUL1	94.3258	53.9085	19.5095	22.3861	3.53819	1.82301
	EGR1	94.3258	63.3424	21.0497	23.9299	3.50533	1.80955
	ALCAM	94.3258	49.8653	16.429	25.4738	3.44108	1.78286
	MTREX	94.3258	47.1699	16.429	25.4738	3.37676	1.75564
	GSK3B	94.3258	52.5608	18.9961	24.7019	3.36141	1.74907
	UTP18	94.3258	67.3856	21.0497	29.3335	3.20963	1.68241
	MFSD10	94.3258	45.8222	22.0765	21.6141	3.20774	1.68156
	NFE2L2	94.3258	33.6928	16.9424	23.158	3.19245	1.67466
	GAK	94.3258	59.2993	15.9156	32.4212	3.17822	1.66822
	TMEM43	94.3258	55.2562	26.6972	20.8422	3.14649	1.65374
	SNRPA	94.3258	56.6039	22.0765	27.0177	3.07429	1.62025
	COMT	94.3258	48.5176	21.0497	26.2457	3.02024	1.59466
	SIPA1L3	94.3258	45.8222	20.5363	26.2457	2.99577	1.58293
	PISD	94.3258	52.5608	26.6972	23.158	2.94627	1.55889
	ARF4	94.3258	59.2993	20.0229	32.4212	2.92931	1.55056
	ASPM	94.3258	47.1699	18.4827	30.1054	2.91215	1.54208
	CHP1	94.3258	60.647	27.724	26.2457	2.87148	1.52179
	CAMSAP2	94.3258	49.8653	30.291	20.0703	2.86313	1.5176
	RNF4	94.3258	45.8222	26.1838	23.9299	2.7966	1.48367
	QARS1	94.3258	66.0379	21.5631	36.2809	2.77235	1.47111
[truncated: 8,567 more rows]

## Sheet: Table 3
	Gene ID	log2FC	Q value
	ANXA2	1.15541	3.4e-14
	RPL7	1.49612	6.5e-14
	PSMD6	1.44789	6.5e-14
	TMSB4X	1.42379	6.5e-14
	AARS1	1.94684	1.89e-13
	STC2	2.06413	2.17e-13
	RPS19	1.4666	4.91e-13
	RPL12	1.77752	7.87e-13
	RPL18A	1.857	8.67e-13
	GATA3	1.84123	8.86e-13
	NQO1	1.29175	9.34e-13
	H3-3B	1.47394	1.095e-12
	ATP5F1B	1.36787	2.108e-12
	RPS5	1.59611	8.275e-12
	SCD	1.45383	1.0432e-11
	RPL10A	1.95761	1.5894e-11
	TMBIM6	1.50113	2.4739e-11
	RPS25	1.70287	1.9575e-10
	RPS23	1.62896	2.04803e-10
	EIF4A2	1.58341	2.24621e-10
	NUCKS1	1.67724	2.70638e-10
	RPL41	1.6313	3.15509e-10
	RPL11	1.67557	4.25235e-10
	RPS16	1.2806	5.64982e-10
	HSPB1	1.93549	5.90464e-10
	PSAP	1.57556	7.9831e-10
	NCL	1.23185	8.94608e-10
	NCOA3	1.9322	1.04073e-09
	HDLBP	1.54763	1.18737e-09
	HUWE1	1.35899	1.33361e-09
	RPS11	1.46725	3.49226e-09
	RPSA	1.35434	3.78278e-09
	SLC25A5	1.35911	4.76058e-09
	PPP3CA	1.87113	8.00754e-09
	CCND1	1.51336	1.26307e-08
	HSPD1	1.23393	2.93659e-08
	CANX	1.61852	4.07411e-08
	RPL23A	1.50488	5.02182e-08
	RPL14	1.60515	6.85354e-08
	XPOT	2.01073	7.25002e-08
	FASN	1.45168	7.76407e-08
	NUMA1	2.16481	8.70752e-08
	RPL37A	1.49807	1.07338e-07
	RPS4X	1.62989	1.08459e-07
	RPL5	1.71573	2.09218e-07
	RPS7	1.54262	2.78831e-07
	RPL19	1.43786	3.18675e-07
	P4HB	1.53846	4.59526e-07
	TPM4	1.5055	5.14612e-07
	RAN	1.30431	5.57506e-07
	RPS24	1.49106	5.85033e-07
	SLC38A1	1.9736	6.19112e-07
	DSCAM-AS1	2.36381	7.53521e-07
	RPS27A	1.52645	9.45731e-07
	APLP2	1.64126	1.15789e-06
	RPS12	1.62786	1.21713e-06
	CFL1	1.3125	2.0534e-06
	TPI1	1.15753	2.07263e-06
	CALR	1.60508	2.14879e-06
	PRDX1	1.18608	2.14879e-06
	ATP1A1	1.4272	2.27877e-06
	SPTSSB	1.48957	2.68861e-06
	MAT2A	1.29258	2.85309e-06
	RPL28	1.62869	3.71653e-06
	RPL18	1.44366	4.04113e-06
	PTPRF	1.96929	4.20294e-06
	CNBP	1.51554	4.55515e-06
	KRT19	1.62682	4.62567e-06
	FHL1	2.05479	5.49743e-06
	PREX1	2.2165	5.71028e-06
	SET	1.40902	9.95788e-06
	KIF1C	2.35323	1.13112e-05
	EIF4G1	1.15131	1.91227e-05
	CDH1	1.6427	2.0819e-05
	HSP90B1	1.35192	2.20298e-05
	APP	1.71523	2.20408e-05
	RPS9	1.61256	2.7666e-05
	SYTL2	1.65119	4.54656e-05
	NAP1L1	1.61539	5.11124e-05
	RPL24	1.75256	5.43816e-05
	HIPK1	1.73548	6.28841e-05
	ACTN4	1.16312	7.78639e-05
	ESR1	2.01079	8.82667e-05
	EIF3A	1.61585	9.1154e-05
	EIF3B	1.35303	9.38411e-05
	SNRNP200	1.63	0.000139192
	IGFBP4	1.31082	0.000140981
	HNRNPUL1	1.63221	0.000153477
	NONO	1.48614	0.000162444
	SLC3A2	1.4065	0.000168364
	SARS1	2.25567	0.000173664
	MYH9	1.50919	0.000195825
	EIF3E	1.82971	0.000197133
	SLC38A2	1.88083	0.000201387
	H2AZ1	1.14733	0.000205291
	SLC9A3R1	1.69774	0.000216876
	BTF3	1.71327	0.000277325
	UBA1	1.56493	0.000277325
	SLC25A3	1.30797	0.000281082
	HNRNPC	1.4291	0.000311665
	RPL21	1.60597	0.00032714
	RPL31	1.60269	0.000334784
	MYOF	1.51048	0.000433498
	GANAB	1.61888	0.000440919
	RPL27A	1.53635	0.000476103
	RPL29	1.54436	0.000486444
	CTTN	1.43448	0.00049108
	KPNB1	1.23116	0.000563159
	MYL12B	1.39898	0.000588939
	RPL23	1.57707	0.000704938
	DYNC1H1	1.52257	0.000720898
	PLEC	1.33275	0.000720898
	RPS6KB1	1.29454	0.000720898
	HDGF	1.40584	0.000852395
	SF3B3	1.43166	0.000919018
	ZFP36L2	1.98283	0.000965911
	USP32	1.78804	0.000998985
	HNRNPM	1.40583	0.00100869
	CLU	1.40194	0.00101932
	CENPB	1.85588	0.00111059
	RAC1	1.83473	0.00151126
	MRFAP1	1.50104	0.00156864
	RPS27	1.49903	0.00165236
	FLNB	1.42591	0.00169232
	NEAT1	2.07883	0.00176237
	HSPA9	1.29866	0.0019552
	SERBP1	1.36303	0.00212832
	UBC	1.47302	0.00219339
	PRKDC	1.52087	0.00233143
	CD63	1.44553	0.0023905
	ILF3	1.36135	0.00255865
	DSTN	1.42676	0.00280991
	TRIM28	1.12267	0.0030767
	GAS5	2.08893	0.00327036
	HSPA5	1.44055	0.00337402
	SYNCRIP	1.20921	0.00337402
	CD47	2.13456	0.00371572
	RBMX	1.52511	0.00381608
	HMGN1	1.71855	0.00388431
	STARD10	1.54603	0.00404102
	CNOT1	1.64293	0.00431042
	RPS15	1.59208	0.00439656
	MTDH	1.54485	0.00439656
	ATP2A2	1.23852	0.00494728
	CERS2	1.59807	0.00523102
	KIAA0100	1.73648	0.00531337
	DDB1	1.42051	0.0053191
	QKI	1.27857	0.00531913
	TKT	1.06408	0.00636179
	RPL35	1.53594	0.00704121
	AGR2	1.53814	0.00711446
	KPNA2	1.47395	0.00732049
	TOP2B	1.7817	0.00764279
	HNRNPF	1.4891	0.00783001
	RHOA	1.31367	0.00783001
	EIF2S3	1.70663	0.00803564
	LARP1	1.60343	0.00845286
	KRT80	1.51693	0.00870504
	FUS	1.47959	0.00870504
	CDC42BPB	1.7718	0.00927608
	PRPF8	1.42871	0.00927608
	NRAS	1.71825	0.00953077
	ANP32B	1.81188	0.00959835
	CDV3	1.77424	0.00959835
	TUBA1C	1.0389	0.00959835
	ANKRD11	1.80339	0.0105214
	APPBP2	1.60235	0.0108269
	PTGES3	1.30406	0.0111793
	IFI6	2.20593	0.0116666
	EIF4H	1.5011	0.0117131
	MSI2	1.77135	0.0121258
	FAM120A	1.69261	0.0126689
	PTPN11	1.76005	0.0143146
	RPL39	1.44484	0.0146172
	PGD	1.28688	0.0150019
	CALM1	1.24712	0.015153
	GRN	2.1031	0.0156651
	RAB7A	1.51669	0.0156651
	VCP	1.24724	0.0158817
	CCT3	1.32113	0.0162101
	MTHFD2	2.23709	0.0169771
	YWHAB	1.52111	0.0169771
	MYL6	1.36143	0.0186617
	ADAR	1.73412	0.0189799
	PGK1	1.31566	0.0191753
	RPS13	1.55381	0.0197497
	PAPOLA	1.35762	0.0202324
	PIEZO1	1.53334	0.0206099
	UBR5	1.92984	0.0235337
	PLXNB2	1.96647	0.0240227
	PCBP1	1.6025	0.024274
	STAT1	1.85762	0.0243444
	PPT1	1.81298	0.0247846
	NORAD	1.81095	0.0258391
	GSE1	1.58057	0.0263385
	TSKU	1.68187	0.0274179
	MAZ	1.41361	0.0274801
	EWSR1	1.17635	0.0274801
	RCC2	1.92826	0.0309974
	PRRC2A	1.44995	0.0309974
	MBTPS1	1.82757	0.0311483
	CTNNA1	1.50394	0.0311483
	DDX17	1.70309	0.0331722
	SLC1A5	1.54798	0.0332263
	SEPTIN9	1.48905	0.0356552
	HMGN2	1.38173	0.0369439
	MED13	2.12053	0.0390155
	MARS1	1.71893	0.0391058
	IARS1	1.65244	0.0391058
	NMD3	1.84306	0.0434326
	DSP	1.80235	0.0434326
	TACSTD2	1.97292	0.0439146
	CCNI	1.84533	0.0439146
	ZNF217	2.06133	0.0449819
	TOP2A	1.76622	0.0450556
	ZNF664	1.74345	0.04513
	RPS29	1.6986	0.0453171
	SF3B1	1.63144	0.0460441
	RPS20	1.42976	0.0478488
	MCM7	1.25591	0.0488684
	PCBP2	1.55615	0.0495714
	SQSTM1	1.1639	0.049639
	COL3A1	2.40504	<0.000000000000001
	XBP1	1.95366	<0.000000000000001
	RPL13	1.91282	<0.000000000000001
	EEF2	1.91004	<0.000000000000001
	TRIM37	1.89296	<0.000000000000001
	EIF4B	1.84433	<0.000000000000001
	RPL3	1.82014	<0.000000000000001
	RACK1	1.81734	<0.000000000000001
	TPT1	1.78291	<0.000000000000001
	RPS18	1.78237	<0.000000000000001
	RPL37	1.77113	<0.000000000000001
	RPL10	1.76654	<0.000000000000001
	EEF1A1	1.75065	<0.000000000000001
	GNAS	1.73013	<0.000000000000001
	RPL32	1.72776	<0.000000000000001
	RPL13A	1.71391	<0.000000000000001
	RPL15	1.71389	<0.000000000000001
	RPS3A	1.7093	<0.000000000000001
	SRRM2	1.7063	<0.000000000000001
	TFF1	1.69637	<0.000000000000001
	RPLP0	1.66953	<0.000000000000001
	RPL30	1.66647	<0.000000000000001
	AHNAK	1.65726	<0.000000000000001
	PABPC1	1.64415	<0.000000000000001
	RPS6	1.63754	<0.000000000000001
	MALAT1	1.63493	<0.000000000000001
	RPS3	1.63181	<0.000000000000001
	CSDE1	1.6208	<0.000000000000001
	RPL7A	1.61001	<0.000000000000001
	RPS8	1.58086	<0.000000000000001
	RPL4	1.56817	<0.000000000000001
	PTMA	1.56592	<0.000000000000001
	RPL6	1.54259	<0.000000000000001
	RPS14	1.53927	<0.000000000000001
	RPL8	1.53268	<0.000000000000001
	KRT18	1.52423	<0.000000000000001
	CLTC	1.51025	<0.000000000000001
	KRT8	1.49016	<0.000000000000001
	RPLP1	1.47497	<0.000000000000001
	RPS2	1.46832	<0.000000000000001
	NPM1	1.46635	<0.000000000000001
	FLNA	1.39579	<0.000000000000001
	ACTG1	1.35523	<0.000000000000001
	YWHAZ	1.34994	<0.000000000000001
	PPIA	1.33221	<0.000000000000001
	FTH1	1.32907	<0.000000000000001
	EIF4G2	1.3169	<0.000000000000001
	SLC7A5	1.31044	<0.000000000000001
	HNRNPA1	1.29787	<0.000000000000001
	DDX3X	1.29439	<0.000000000000001
	HSP90AB1	1.2942	<0.000000000000001
	ACTB	1.2652	<0.000000000000001
	GAPDH	1.25728	<0.000000000000001
	HSP90AA1	1.22129	<0.000000000000001
	YBX1	1.21936	<0.000000000000001
	UBE2D3	1.18589	<0.000000000000001
	PKM	1.17503	<0.000000000000001
	HSPA8	1.13096	<0.000000000000001
	ENO1	1.05319	<0.000000000000001
	HNRNPK	1.00526	<0.000000000000001
	FTL	1.004	<0.000000000000001

## Sheet: Table 4
	Gene ID	Mouse_Coculture_1(RPM)	Mouse_Coculture_2 (RPM)	Mouse_Mix_1 (RPM)	Mouse_Mix_2 (RPM)	Human_Endogenous_1 (RPM)	Human_Endogenous_2 (RPM)	Avg_Coculture	Avg_Mix	Avg_Endogenous	FC	log2FC	Condition 1 (both Coculture samples >10)	Condition 2 (both endogenous samples >100)	Transfer %	Log10(Transfer %)	Q value < 0.05
	EEF1A1	12684.8	6377.37	2515.18	3149.49	1.94357e+06	2.05309e+06	9531.07	2832.33	1.99833e+06	3.36509	1.75065	yes	yes	0.335218	-0.474673	yes
	MT-CO1	10371.7	7894.89	6584.45	7425.23	1.05993e+06	1.18344e+06	9133.32	7004.84	1.12168e+06	1.30386	0.382787	yes	yes	0.189758
	KRT8	6963.71	4307.29	1778.96	2233.2	948613	945956	5635.5	2006.08	947284	2.80921	1.49016	yes	yes	0.383139	-0.416644	yes
	MT-RNR2	8665.67	5861.2	5202.87	5409.71	767410	816607	7263.44	5306.29	792008	1.36884	0.452949	yes	yes	0.247112
	EEF2	3408.03	1593	593.499	737.196	701379	716434	2500.51	665.348	708907	3.75821	1.91004	yes	yes	0.258873	-0.586914	yes
	MT-ND4	6246.01	4621.3	4340.34	4852.37	541262	569597	5433.66	4596.36	555430	1.18217	0.241432	yes	yes	0.150748
	KRT18	4119.58	2548.52	1022.19	1296.08	538854	550974	3334.05	1159.13	544914	2.87633	1.52423	yes	yes	0.39913	-0.398885	yes
	PABPC1	3902.22	2080.87	841.988	1072.22	480118	499511	2991.54	957.102	489814	3.12563	1.64415	yes	yes	0.415349	-0.381586	yes
	COL3A1	2175.65	707.549	264.918	279.44	484679	471058	1441.6	272.179	477869	5.2965	2.40504	yes	yes	0.244715	-0.611339	yes
	MT-CO2	4775.76	3412.41	3355.12	3880.51	413788	444777	4094.08	3617.81	429282	1.13165	0.178422	yes	yes	0.110945
	ACTG1	2961.01	1975.75	841.988	1087.65	423425	432051	2468.38	964.821	427738	2.55838	1.35523	yes	yes	0.351514	-0.454058	yes
	CSDE1	3408.03	1845.02	748.548	959.513	409220	429584	2626.53	854.03	419402	3.07545	1.6208	yes	yes	0.422624	-0.374046	yes
	RPLP0	2632.92	1371.97	570.395	688.565	401316	408876	2002.45	629.48	405096	3.18111	1.66953	yes	yes	0.338924	-0.469898	yes
	RPL13	2079.27	885.447	337.309	450.037	383291	386979	1482.36	393.673	385135	3.76546	1.91282	yes	yes	0.282676	-0.548711	yes
	MT-ND5	3094.3	2361.19	2420.2	2806.75	354285	387044	2727.74	2613.48	370665	1.04372	0.0617386	yes	yes	0.030828
	RPS2	1939.83	1184.64	495.438	633.757	348964	367508	1562.23	564.598	358236	2.76699	1.46832	yes	yes	0.278486	-0.555196	yes
	MT-CO3	3865.31	2950.14	2720.54	3010.54	340420	368428	3407.72	2865.54	354424	1.18921	0.25	yes	yes	0.152976
	MT-CYB	3092.25	2168.47	2145.53	2389.91	340602	364327	2630.36	2267.72	352464	1.15991	0.214018	yes	yes	0.102887
	FLNA	2790.81	1661.73	737.253	954.882	348301	322585	2226.27	846.067	335443	2.63132	1.39579	yes	yes	0.411457	-0.385675	yes
	RPL8	2185.9	1280.33	539.591	658.459	320849	329801	1733.11	599.025	325325	2.89322	1.53268	yes	yes	0.348601	-0.457671	yes
	ACTB	2956.91	2110.52	931.834	1176.43	316794	323635	2533.71	1054.13	320215	2.40361	1.2652	yes	yes	0.46206	-0.335302	yes
	EIF4B	1293.9	601.079	225.899	301.826	300791	315182	947.492	263.863	307987	3.59085	1.84433	yes	yes	0.221967	-0.653711	yes
	FTH1	2606.26	1784.37	791.161	956.425	279567	288521	2195.32	873.793	284044	2.5124	1.32907	yes	yes	0.465254	-0.33231	yes
	GAPDH	2546.8	2055.26	873.819	1051.37	278857	282849	2301.03	962.596	280853	2.39044	1.25728	yes	yes	0.476559	-0.321883	yes
	RPL3	1597.39	742.589	287.508	375.16	267907	272906	1169.99	331.334	270407	3.53115	1.82014	yes	yes	0.310146	-0.508434	yes
	GNAS	1636.35	824.8	317.286	424.563	255482	257278	1230.57	370.924	256380	3.31759	1.73013	yes	yes	0.335303	-0.474563	yes
	RPL7A	1619.94	828.843	361.439	440.774	240593	253286	1224.39	401.106	246940	3.05254	1.61001	yes	yes	0.333396	-0.47704	yes
	RPS3	1605.59	916.444	350.657	463.16	241793	246217	1261.02	406.909	244005	3.09902	1.63181	yes	yes	0.350037	-0.455886	yes
	RPL10	1470.25	731.807	293.669	353.545	232872	240267	1101.03	323.607	236569	3.40237	1.76654	yes	yes	0.328624	-0.483301	yes
	RPL13A	1624.04	916.444	361.439	412.984	231437	235238	1270.24	387.212	233338	3.28049	1.71391	yes	yes	0.378435	-0.422008	yes
	XBP1	1371.83	591.645	222.819	284.071	227883	234579	981.736	253.445	231231	3.87356	1.95366	yes	yes	0.314963	-0.501741	yes
	RPL4	1527.67	943.398	367.086	466.248	221037	227187	1235.53	416.667	224112	2.96528	1.56817	yes	yes	0.365382	-0.437253	yes
	RPS18	1550.22	822.104	302.91	386.739	218596	224686	1186.16	344.824	221641	3.43991	1.78237	yes	yes	0.379596	-0.420679	yes
	MT-ATP6	1876.26	1475.74	1295.84	1468.22	211529	223260	1676	1382.03	217394	1.21271	0.278238	yes	yes	0.135227
	TPT1	1425.14	663.074	288.021	318.808	204296	211327	1044.11	303.415	207812	3.44119	1.78291	yes	yes	0.356425	-0.448032	yes
	MALAT1	1527.67	650.945	303.937	397.546	210647	202417	1089.31	350.741	206532	3.10573	1.63493	yes	yes	0.357603	-0.446599	yes
	RPL15	1306.21	661.726	281.861	318.037	201589	209246	983.967	299.949	205418	3.28045	1.71389	yes	yes	0.332989	-0.47757	yes
	PKM	2036.21	1626.69	713.636	908.566	201086	203046	1831.45	811.101	202066	2.25798	1.17503	yes	yes	0.504958	-0.296745	yes
	HSP90AB1	1738.88	1216.98	526.756	678.529	192809	199710	1477.93	602.643	196259	2.45242	1.2942	yes	yes	0.445985	-0.35068	yes
	GATA3	840.73	376.012	141.187	198.387	182792	181560	608.371	169.787	182176	3.58314	1.84123	yes	yes	0.240747	-0.618439	yes
	RACK1	1181.12	660.379	253.11	269.405	178162	181038	920.751	261.257	179600	3.52431	1.81734	yes	yes	0.367202	-0.435095	yes
	RPS8	1092.95	529.651	219.738	322.668	172116	179177	811.3	271.203	175646	2.99148	1.58086	yes	yes	0.307492	-0.512167	yes
	AARS1	853.034	363.882	139.647	176.001	172370	172092	608.458	157.824	172231	3.8553	1.94684	yes	yes	0.261646	-0.582286	yes
	AHNAK	1511.26	719.678	346.036	361.265	181877	156577	1115.47	353.651	169227	3.15416	1.65726	yes	yes	0.450176	-0.346618	yes
	STC2	840.73	339.623	113.976	168.281	164223	166704	590.177	141.129	165463	4.18183	2.06413	yes	yes	0.271389	-0.566409	yes
	CLTC	1390.28	818.061	342.956	432.283	168651	161806	1104.17	387.619	165228	2.8486	1.51025	yes	yes	0.433674	-0.362837	yes
	SRRM2	1078.6	530.998	223.846	269.405	169884	153945	804.797	246.625	161914	3.26324	1.7063	yes	yes	0.344732	-0.462518	yes
	TRIM37	1000.67	444.745	162.237	226.948	157625	165571	722.709	194.593	161598	3.71396	1.89296	yes	yes	0.326809	-0.485706	yes
	TFF1	1199.58	606.47	242.328	314.949	161707	161410	903.024	278.639	161559	3.24085	1.69637	yes	yes	0.386476	-0.412877	yes
	RPS6	1295.95	669.813	281.347	350.458	160699	161352	982.884	315.902	161025	3.11135	1.63754	yes	yes	0.414209	-0.382781	yes
	H3-3B	896.095	469.004	230.52	260.913	157021	161362	682.55	245.717	159192	2.77779	1.47394	yes	yes	0.274407	-0.561605	yes
	RPL30	998.623	529.651	212.037	269.405	153443	158264	764.137	240.721	155853	3.17437	1.66647	yes	yes	0.335839	-0.473869	yes
	RPS14	971.966	632.077	236.167	315.721	150130	156295	802.021	275.944	153212	2.90646	1.53927	yes	yes	0.343365	-0.464244	yes
	MT-ND2	1396.43	1025.61	1101.26	1202.67	147262	158280	1211.02	1151.97	152771	1.05126	0.072126	yes	yes	0.038656
	DDX5	1673.26	1099.73	659.215	802.039	146237	150011	1386.5	730.627	148124	1.89768	0.924236	yes	yes	0.442785
	RPL6	1080.65	592.993	246.435	328.072	142761	150909	836.82	287.254	146835	2.91317	1.54259	yes	yes	0.374274	-0.42681	yes
	HNRNPA1	1326.71	943.398	401.484	521.827	140636	149922	1135.06	461.656	145279	2.45866	1.29787	yes	yes	0.463522	-0.33393	yes
	RPS3A	990.421	477.09	206.39	242.387	141496	143559	733.756	224.388	142528	3.27002	1.7093	yes	yes	0.357381	-0.446868	yes
	KRT19	576.208	324.799	127.325	164.422	139828	141179	450.503	145.873	140504	3.08832	1.62682	yes	yes	0.216813	-0.663915	yes
	SPTSSB	627.472	336.928	138.107	205.334	136916	142530	482.2	171.72	139723	2.80805	1.48957	yes	yes	0.222211	-0.653235	yes
	HSP90AA1	1423.09	1000	441.017	598.248	134542	141825	1211.55	519.633	138184	2.33154	1.22129	yes	yes	0.50072	-0.300405	yes
	RPSA	721.798	501.349	196.635	281.756	134227	137051	611.573	239.195	135639	2.55679	1.35434	yes	yes	0.274536	-0.561401	yes
	NUCKS1	771.011	377.359	165.317	193.755	131920	137504	574.185	179.536	134712	3.19816	1.67724	yes	yes	0.292957	-0.533196	yes
	TMSB4X	937.107	526.955	240.788	304.914	129228	136879	732.031	272.851	133054	2.6829	1.42379	yes	yes	0.345108	-0.462045	yes
	MT-ND1	1353.37	1107.82	1075.07	1219.65	125994	135761	1230.59	1147.36	130878	1.07254	0.101032	yes	yes	0.0635937
	NPM1	1076.54	654.988	291.615	335.019	126630	133982	865.766	313.317	130306	2.76323	1.46635	yes	yes	0.423964	-0.372671	yes
	RPL37	916.601	438.006	176.099	220.773	128130	132267	677.304	198.436	130198	3.41321	1.77113	yes	yes	0.367798	-0.43439	yes
	PTMA	871.489	536.389	209.984	265.545	124907	131773	703.939	237.764	128340	2.96066	1.56592	yes	yes	0.363235	-0.439812	yes
	RPL18A	816.123	396.227	147.861	186.808	126321	129311	606.175	167.335	127816	3.62254	1.857	yes	yes	0.343338	-0.464278	yes
	RPLP1	982.219	659.031	262.351	328.072	126374	128668	820.625	295.211	127521	2.77979	1.47497	yes	yes	0.412022	-0.385079	yes
	TMBIM6	814.073	464.961	211.01	240.843	125342	128221	639.517	225.927	126782	2.83064	1.50113	yes	yes	0.326222	-0.486486	yes
	NUMA1	635.674	250.674	87.2792	110.386	128458	121351	443.174	98.8328	124905	4.48408	2.16481	yes	yes	0.275683	-0.559589	yes
	RPL10A	799.719	323.451	130.919	158.246	123037	125095	561.585	144.583	124066	3.88418	1.95761	yes	yes	0.336113	-0.473515	yes
	RPL32	998.623	439.354	187.907	246.247	122994	124214	718.989	217.077	123604	3.31214	1.72776	yes	yes	0.406064	-0.391405	yes
	RPL7	857.135	563.343	214.091	289.475	117221	126138	710.239	251.783	121680	2.82084	1.49612	yes	yes	0.376773	-0.42392	yes
	RPS5	836.629	424.529	197.148	220.001	119965	121449	630.579	208.575	120707	3.02328	1.59611	yes	yes	0.349611	-0.456415	yes
	PPP3CA	697.191	309.974	110.896	164.422	116591	120878	503.582	137.659	118734	3.65819	1.87113	yes	yes	0.308187	-0.511186	yes
	HSPB1	699.241	351.753	127.325	147.439	117057	117926	525.497	137.382	117491	3.82508	1.93549	yes	yes	0.330335	-0.481045	yes
	SLC38A1	609.017	264.151	105.762	116.562	116479	117200	436.584	111.162	116840	3.92746	1.9736	yes	yes	0.27852	-0.555143	yes
	RPL12	773.062	467.656	167.371	194.527	115649	117795	620.359	180.949	116722	3.42836	1.77752	yes	yes	0.376457	-0.424284	yes
	RPL41	758.708	402.966	182.773	192.211	113105	120014	580.837	187.492	116559	3.09793	1.6313	yes	yes	0.337463	-0.471774	yes
	RPS25	744.354	402.966	146.321	206.106	114153	117189	573.66	176.214	115671	3.25548	1.70287	yes	yes	0.343601	-0.463945	yes
	HNRNPA2B1	1808.6	1513.48	787.053	889.267	111385	118241	1661.04	838.16	114813	1.98177	0.986787	yes	yes	0.716711
	ESR1	543.399	180.593	89.3329	90.3162	111794	114655	361.996	89.8245	113225	4.03004	2.01079	yes	yes	0.240382	-0.619099	yes
	RPS4X	641.826	369.273	145.294	181.404	110978	115265	505.549	163.349	113121	3.0949	1.62989	yes	yes	0.302507	-0.519264	yes
	RPS16	809.972	510.783	235.654	308.001	110005	111642	660.377	271.828	110824	2.4294	1.2806	yes	yes	0.350602	-0.455186	yes
	PSMD6	941.208	505.392	240.788	289.475	107935	112778	723.3	265.131	110356	2.72808	1.44789	yes	yes	0.415171	-0.381773	yes
	SLC7A5	949.41	669.813	296.236	356.633	110183	110502	809.611	326.435	110342	2.48016	1.31044	yes	yes	0.437889	-0.358636	yes
	RPS19	857.135	532.346	227.953	274.808	110194	108623	694.74	251.381	109408	2.7637	1.4666	yes	yes	0.405234	-0.392294	yes
	YWHAZ	945.309	619.947	275.186	338.879	106758	111961	782.628	307.033	109359	2.54901	1.34994	yes	yes	0.434892	-0.361618	yes
	CCND1	721.798	392.184	158.643	231.58	107821	109516	556.991	195.111	108669	2.85473	1.51336	yes	yes	0.333012	-0.47754	yes
	PTPRF	555.702	265.499	104.735	104.983	110033	106502	410.601	104.859	108268	3.91574	1.96929	yes	yes	0.282394	-0.549144	yes
	XPOT	637.725	283.019	113.463	115.018	106166	110155	460.372	114.241	108161	4.02985	2.01073	yes	yes	0.320016	-0.494828	yes
	PREX1	545.449	225.068	75.4709	90.3162	108638	107643	385.259	82.8935	108141	4.64763	2.2165	yes	yes	0.279603	-0.553458	yes
	NCOA3	695.14	343.666	124.758	147.439	106302	107443	519.403	136.099	106873	3.81638	1.9322	yes	yes	0.358656	-0.445322	yes
	RPS11	756.657	412.4	195.095	227.72	104694	107906	584.528	211.408	106300	2.76494	1.46725	yes	yes	0.351008	-0.454684	yes
	ZFP36L2	449.073	198.114	73.4172	90.3162	106581	105760	323.593	81.8667	106171	3.95268	1.98283	yes	yes	0.227677	-0.64268	yes
	DSCAM-AS1	600.815	202.157	79.5781	76.4214	104980	107090	401.486	77.9998	106035	5.14727	2.36381	yes	yes	0.305075	-0.515593	yes
	RPL11	756.657	381.402	157.103	199.159	102517	107668	569.03	178.131	105092	3.19445	1.67557	yes	yes	0.371957	-0.429507	yes
	RPS23	777.163	396.227	172.505	206.878	102148	108015	586.695	189.691	105081	3.09289	1.62896	yes	yes	0.377806	-0.422731	yes
	SLC25A5	742.303	471.699	196.122	277.124	102849	106144	607.001	236.623	104497	2.56527	1.35911	yes	yes	0.354441	-0.450456	yes
	PPIA	943.258	614.556	273.646	345.054	101511	106370	778.907	309.35	103940	2.51788	1.33221	yes	yes	0.451757	-0.345095	yes
	RPL37A	623.371	436.659	166.857	208.422	102146	105625	530.015	187.64	103886	2.82464	1.49807	yes	yes	0.329569	-0.482054	yes
	HSPA8	1293.9	1130.73	473.361	633.757	101825	105002	1212.32	553.559	103414	2.19004	1.13096	yes	yes	0.637013	-0.195852	yes
	MT-RNR1	828.427	475.742	421.507	551.16	101973	104041	652.085	486.334	103007	1.34082	0.423112	yes	yes	0.160912
	HDLBP	758.708	402.966	181.233	216.141	101871	104060	580.837	198.687	102966	2.92338	1.54763	yes	yes	0.371143	-0.430458	yes
	CDH1	578.258	270.89	122.191	149.755	102137	99041.3	424.574	135.973	100589	3.12249	1.6427	yes	yes	0.286911	-0.542252	yes
	SCD	822.275	501.349	234.627	248.563	98496	101478	661.812	241.595	99987.1	2.73935	1.45383	yes	yes	0.420271	-0.37647	yes
	NAP1L1	529.045	297.844	126.298	143.58	94414.7	99801.8	413.445	134.939	97108.2	3.06394	1.61539	yes	yes	0.286799	-0.542422	yes
	YBX1	933.005	707.549	302.397	402.177	94842.4	99324.8	820.277	352.287	97083.6	2.32843	1.21936	yes	yes	0.482048	-0.31691	yes
	ATP5F1B	857.135	553.909	241.815	304.914	95276.2	98794.6	705.522	273.364	97035.4	2.58089	1.36787	yes	yes	0.445361	-0.351288	yes
	RPL14	662.331	370.621	158.129	181.404	100464	93090.6	516.476	169.767	96777.2	3.04227	1.60515	yes	yes	0.358255	-0.445808	yes
	RPL18	627.472	340.971	145.294	210.738	95440.3	97206.2	484.221	178.016	96323.2	2.7201	1.44366	yes	yes	0.317894	-0.497718	yes
	CANX	635.674	407.009	142.727	196.843	94008.2	97927.6	521.341	169.785	95967.9	3.0706	1.61852	yes	yes	0.366327	-0.436131	yes
	PSAP	684.888	475.742	177.125	212.282	95525.4	96107.7	580.315	194.704	95816.5	2.9805	1.57556	yes	yes	0.402447	-0.395291	yes
	RPL28	580.309	327.494	119.11	174.457	94037.1	97247.5	453.901	146.784	95642.3	3.09231	1.62869	yes	yes	0.321111	-0.493345	yes
	IFI6	381.404	141.51	56.9882	56.3511	95307.6	95895.9	261.457	56.6697	95601.8	4.6137	2.20593	yes	yes	0.214209	-0.669163	yes
	CFL1	600.815	448.788	180.206	242.387	94257.3	96664	524.801	211.297	95460.7	2.48372	1.3125	yes	yes	0.328412	-0.48358	yes
	NONO	543.399	280.324	136.566	157.474	93591.4	96910.7	411.861	147.02	95251.1	2.80139	1.48614	yes	yes	0.278045	-0.555884	yes
	NQO1	869.438	611.861	280.834	324.212	93017.4	96233.8	740.65	302.523	94625.6	2.44824	1.29175	yes	yes	0.463011	-0.334409	yes
	RPS12	582.359	359.839	128.865	176.001	94046.4	94869.1	471.099	152.433	94457.8	3.09053	1.62786	yes	yes	0.337364	-0.471902	yes
	RPL5	637.725	328.842	148.375	145.895	92335.3	96152.3	483.283	147.135	94243.8	3.28462	1.71573	yes	yes	0.356679	-0.447722	yes
	ENO1	1031.43	908.358	444.611	490.178	90758.6	93166.6	969.895	467.394	91962.6	2.07511	1.05319	yes	yes	0.546419	-0.262474	yes
	RPL23A	680.786	398.923	158.129	222.317	91052.9	92671.2	539.855	190.223	91862	2.83801	1.50488	yes	yes	0.380605	-0.419526	yes
	TPM4	621.32	389.489	152.995	203.018	88351	92148.6	505.404	178.007	90249.8	2.83924	1.5055	yes	yes	0.362768	-0.440371	yes
	APLP2	641.826	297.844	140.674	160.562	88533.8	90298.3	469.835	150.618	89416.1	3.11938	1.64126	yes	yes	0.357002	-0.447329	yes
	EIF4G2	2766.21	2339.63	984.202	1065.27	87701.3	90753.5	2552.92	1024.73	89227.4	2.4913	1.3169	yes	yes	1.71268	0.233677	yes
	P4HB	619.27	382.75	153.509	191.439	85683.2	87780.9	501.01	172.474	86732	2.90484	1.53846	yes	yes	0.378794	-0.421597	yes
	NCL	758.708	580.864	262.351	308.001	84092	89333.5	669.786	285.176	86712.7	2.34867	1.23185	yes	yes	0.443544	-0.353063	yes
	SYTL2	551.601	269.542	106.275	155.159	86472.4	86116.4	410.572	130.717	86294.4	3.14092	1.65119	yes	yes	0.324302	-0.48905	yes
	RPS7	611.067	404.313	157.103	191.439	84552.1	86056.6	507.69	174.271	85304.3	2.91322	1.54262	yes	yes	0.390859	-0.40798	yes
	HNRNPK	1412.84	1119.95	573.989	687.793	82881.8	86816.1	1266.39	630.891	84848.9	2.00731	1.00526	yes	yes	0.74898	-0.12553	yes
	EIF3E	494.185	235.85	91.8999	113.474	82180.2	86594.4	365.017	102.687	84387.3	3.55466	1.82971	yes	yes	0.310865	-0.507429	yes
	SLC9A3R1	522.893	231.806	91.3865	141.264	83121.6	84978.8	377.35	116.325	84050.2	3.24392	1.69774	yes	yes	0.310558	-0.507857	yes
	HSP90B1	572.107	374.664	161.723	209.194	80942.8	84184.6	473.385	185.459	82563.7	2.55251	1.35192	yes	yes	0.348733	-0.457507	yes
	RPS24	668.483	343.666	177.125	182.948	81064.4	83755.4	506.075	180.037	82409.9	2.81095	1.49106	yes	yes	0.39563	-0.402711	yes
	RPS27A	637.725	346.362	152.482	189.124	80473.3	83754.3	492.043	170.803	82113.8	2.88077	1.52645	yes	yes	0.391214	-0.407586	yes
	CERS2	440.871	208.895	94.9803	119.65	80738.7	83197	324.883	107.315	81967.8	3.02738	1.59807	yes	yes	0.265431	-0.576048	yes
	STARD10	442.921	230.459	87.7926	142.808	80981	81080.5	336.69	115.3	81030.8	2.92012	1.54603	yes	yes	0.273217	-0.563492	yes
	EIF3A	529.045	277.629	122.704	140.492	79564.2	81637.9	403.337	131.598	80601	3.06491	1.61585	yes	yes	0.33714	-0.472189	yes
	HUWE1	809.972	439.354	231.547	255.51	84888.8	75706.7	624.663	243.528	80297.8	2.56505	1.35899	yes	yes	0.474652	-0.323625	yes
	MRFAP1	457.275	269.542	113.976	142.808	78180.5	81603.1	363.409	128.392	79891.8	2.83046	1.50104	yes	yes	0.294169	-0.531403	yes
	RPL19	590.562	462.265	186.367	202.247	79466.4	80208	526.413	194.307	79837.2	2.70919	1.43786	yes	yes	0.41598	-0.380928	yes
	SLC38A2	502.388	216.982	96.5206	98.8075	79395	80250.4	359.685	97.664	79822.7	3.68288	1.88083	yes	yes	0.328253	-0.483791	yes
	RPL29	508.539	254.717	110.383	151.299	77847.2	80871.9	381.628	130.841	79359.5	2.91674	1.54436	yes	yes	0.316015	-0.500293	yes
	HSPD1	732.05	501.349	221.792	302.598	76852.1	81207.6	616.7	262.195	79029.9	2.35207	1.23393	yes	yes	0.448571	-0.348169	yes
	FASN	672.584	416.443	182.773	215.369	83287.5	74257.3	544.514	199.071	78772.4	2.73527	1.45168	yes	yes	0.438532	-0.357998	yes
	RAN	606.966	490.567	204.336	240.071	76614.9	80675.2	548.767	222.204	78645	2.46966	1.30431	yes	yes	0.415237	-0.381704	yes
	SARS1	469.579	198.114	68.7966	71.0179	76916.8	79550.7	333.846	69.9072	78233.7	4.77556	2.25567	yes	yes	0.337372	-0.471891	yes
	APP	500.337	327.494	127.838	124.281	76574.9	77808	413.915	126.06	77191.4	3.28348	1.71523	yes	yes	0.372911	-0.428394	yes
	HIPK1	529.045	260.108	105.762	131.229	76824.1	76417.3	394.577	118.495	76620.7	3.32989	1.73548	yes	yes	0.360322	-0.443309	yes
	GSE1	397.809	176.55	73.9306	118.106	77522.3	75070	287.18	96.0182	76296.2	2.99089	1.58057	yes	yes	0.250552	-0.601103	yes
	EIF4G1	631.573	421.834	201.769	272.492	76897.2	75374.2	526.703	237.131	76135.7	2.22115	1.15131	yes	yes	0.380337	-0.419831	yes
	HMGN1	449.073	188.68	96.5206	97.2636	74667.3	77300.6	318.876	96.8921	75984	3.29105	1.71855	yes	yes	0.292146	-0.5344	yes
	CD47	424.466	152.291	58.015	73.3337	74784.7	76958.3	288.379	65.6743	75871.5	4.39104	2.13456	yes	yes	0.293528	-0.53235	yes
	PIEZO1	408.062	188.68	85.739	120.422	77833.5	72801.4	298.371	103.08	75317.5	2.89455	1.53334	yes	yes	0.25929	-0.586215	yes
	ACTN4	592.612	396.227	209.984	231.58	75388.5	74369.2	494.42	220.782	74878.9	2.2394	1.16312	yes	yes	0.365441	-0.437183	yes
	ATP1A1	623.371	370.621	167.371	202.247	74689.5	74341	496.996	184.809	74515.2	2.68924	1.4272	yes	yes	0.418957	-0.37783	yes
	RPS20	328.09	245.284	93.9535	118.878	74163	74643	286.687	106.416	74403	2.69403	1.42976	yes	yes	0.24229	-0.615665	yes
	HDGF	492.135	289.758	129.892	165.194	72373.7	75947.9	390.946	147.543	74160.8	2.64971	1.40584	yes	yes	0.32821	-0.483848	yes
	NEAT1	442.921	168.464	62.1223	82.5969	77876.9	70404.6	305.693	72.3596	74140.8	4.22463	2.07883	yes	yes	0.314716	-0.502081	yes
	GAS5	451.124	136.119	60.0686	77.9653	73545.6	74614.8	293.621	69.017	74080.2	4.25433	2.08893	yes	yes	0.303191	-0.518284	yes
	HNRNPUL1	502.388	281.672	110.896	142.036	73222.4	73771.7	392.03	126.466	73497.1	3.09989	1.63221	yes	yes	0.361326	-0.442101	yes
	CALR	580.309	351.753	139.647	166.738	72287.8	74455.1	466.031	153.192	73371.4	3.04213	1.60508	yes	yes	0.426377	-0.370207	yes
	SET	621.32	330.189	162.237	196.071	71281.7	74702.8	475.755	179.154	72992.3	2.65556	1.40902	yes	yes	0.406346	-0.391104	yes
	ADAR	379.354	183.289	78.0379	91.0881	72755.5	72907.9	281.321	84.563	72831.7	3.32677	1.73412	yes	yes	0.270155	-0.568387	yes
	APPBP2	408.062	206.2	85.739	116.562	70823.3	74057.4	307.131	101.15	72440.4	3.03638	1.60235	yes	yes	0.284345	-0.546155	yes
	HMGN2	408.062	192.723	106.275	124.281	70580.1	73672.8	300.392	115.278	72126.4	2.6058	1.38173	yes	yes	0.256652	-0.590655	yes
	TRIM28	455.225	378.707	176.099	206.878	72930.7	71268.4	416.966	191.488	72099.6	2.1775	1.12267	yes	yes	0.312731	-0.50483	yes
	SNRNP200	518.792	269.542	124.245	130.457	74365.4	69350.7	394.167	127.351	71858.1	3.09513	1.63	yes	yes	0.37131	-0.430263	yes
	HNRNPU	1302.11	1037.74	561.668	618.319	71154.2	72558.1	1169.92	589.993	71856.1	1.98294	0.987643	yes	yes	0.80707
	EIF2S3	410.112	198.114	86.7658	99.5794	70010.3	72176.7	304.113	93.1726	71093.5	3.26397	1.70663	yes	yes	0.296708	-0.52767	yes
	TSKU	340.393	212.938	82.1452	90.3162	71021.5	71153.2	276.666	86.2307	71087.4	3.20844	1.68187	yes	yes	0.267889	-0.572045	yes
	EIF3B	592.612	299.192	132.972	216.141	70292.7	70547	445.902	174.557	70419.8	2.55448	1.35303	yes	yes	0.385325	-0.414173	yes
	GANAB	498.286	249.327	109.869	133.544	70590.3	69610.4	373.807	121.707	70100.4	3.07137	1.61888	yes	yes	0.359627	-0.444148	yes
	SERBP1	500.337	254.717	131.432	162.106	68051.7	71362.9	377.527	146.769	69707.3	2.57225	1.36303	yes	yes	0.331039	-0.480121	yes
	RPL31	461.376	300.54	111.923	138.948	68509.3	70340.5	380.958	125.435	69424.9	3.03709	1.60269	yes	yes	0.368056	-0.434086	yes
	MYL12B	524.944	274.933	133.486	169.825	67096.7	71330.3	399.938	151.656	69213.5	2.63715	1.39898	yes	yes	0.35872	-0.445244	yes
	DYNC1H1	518.792	234.502	110.896	151.299	74607	63197.9	376.647	131.097	68902.4	2.87303	1.52257	yes	yes	0.356373	-0.448096	yes
	SLC25A3	549.55	315.365	150.942	198.387	67820.4	69395.3	432.458	174.664	68607.8	2.47594	1.30797	yes	yes	0.375749	-0.425102	yes
	SULF2	321.938	163.073	64.6893	78.7372	67905.5	68521.7	242.506	71.7133	68213.6	3.3816	1.75771	yes	yes	0.250379	-0.601402
	DSP	350.646	160.378	64.6893	81.8249	70770.6	65613.2	255.512	73.2571	68191.9	3.48788	1.80235	yes	yes	0.267267	-0.573054	yes
	MYOF	483.933	293.801	120.137	152.843	69337.6	66822.5	388.867	136.49	68080	2.84905	1.51048	yes	yes	0.370706	-0.43097	yes
	RPL21	473.68	288.41	111.409	138.948	66825.4	69204.1	381.045	125.179	68014.7	3.04401	1.60597	yes	yes	0.376193	-0.42459	yes
	H2AZ1	531.095	423.181	183.8	247.019	66536.2	69262.7	477.138	215.409	67899.5	2.21503	1.14733	yes	yes	0.385466	-0.414014	yes
	TUBA1B	953.511	854.449	422.534	487.09	67147.7	68616.3	903.98	454.812	67882	1.98759	0.991021	yes	yes	0.66169
	MAZ	350.646	258.761	106.789	121.965	66907	68592.4	304.703	114.377	67749.7	2.66402	1.41361	yes	yes	0.280926	-0.551409	yes
	TPI1	647.977	487.872	235.141	274.036	67219.1	68198	567.925	254.588	67708.6	2.23076	1.15753	yes	yes	0.462772	-0.334633	yes
	MYH9	473.68	335.58	120.651	163.65	70232.3	64640.8	404.63	142.15	67436.5	2.84649	1.50919	yes	yes	0.389225	-0.4098	yes
	BTF3	467.528	274.933	111.409	115.018	65585.4	69211.7	371.231	113.214	67398.6	3.27902	1.71327	yes	yes	0.382823	-0.417002	yes
	BCAS3	346.545	149.596	71.3636	72.5617	66330.4	68140.4	248.07	71.9627	67235.4	3.44721	1.78543	yes	yes	0.261927	-0.58182
	RPL27A	498.286	268.195	112.95	151.299	66003.9	68095.8	383.241	132.124	67049.8	2.90061	1.53635	yes	yes	0.374522	-0.426523	yes
	AGR2	424.466	225.068	87.7926	135.86	64449.3	66831.2	324.767	111.826	65640.2	2.90421	1.53814	yes	yes	0.324406	-0.488911	yes
	RPS27	479.831	245.284	108.329	148.211	64512.2	66679	362.557	128.27	65595.6	2.82652	1.49903	yes	yes	0.357169	-0.447126	yes
	NPNT	321.938	145.553	47.7469	70.2459	64797.1	66172.7	233.746	58.9964	65484.9	3.96203	1.98624	yes	yes	0.266854	-0.573726
	CTTN	504.438	291.106	120.651	173.685	64584.5	66174.9	397.772	147.168	65379.7	2.70285	1.43448	yes	yes	0.383306	-0.416455	yes
	ILF3	449.073	297.844	129.379	161.334	65520.8	65006.9	373.459	145.356	65263.9	2.56926	1.36135	yes	yes	0.349508	-0.456543	yes
	RPS6KB1	539.298	289.758	162.75	175.229	63860.7	66411.8	414.528	168.989	65136.3	2.45298	1.29454	yes	yes	0.376961	-0.423703	yes
	ANKRD11	371.152	207.548	70.8502	94.9478	65818.5	64128	289.35	82.899	64973.2	3.49039	1.80339	yes	yes	0.317747	-0.497918	yes
	USP32	467.528	211.591	81.6318	115.018	64222.2	65088.4	339.559	98.3249	64655.3	3.45344	1.78804	yes	yes	0.373109	-0.428165	yes
	CALM1	410.112	283.019	125.271	166.738	63298.6	66011.9	346.566	146.004	64655.3	2.37367	1.24712	yes	yes	0.310201	-0.508357	yes
	TOP2B	358.848	238.545	82.6586	91.0881	64058.9	64921.1	298.697	86.8733	64490	3.4383	1.7817	yes	yes	0.328459	-0.483519	yes
	SLC3A2	518.792	330.189	148.888	171.369	64377.8	64257.3	424.491	160.129	64317.5	2.65094	1.4065	yes	yes	0.411026	-0.38613	yes
	RPL24	535.197	254.717	101.655	132.773	63145.5	65449.1	394.957	117.214	64297.3	3.36955	1.75256	yes	yes	0.431967	-0.364549	yes
	HNRNPF	401.91	254.717	101.141	132.773	63279.9	65263.3	328.314	116.957	64271.6	2.80714	1.4891	yes	yes	0.328849	-0.483003	yes
	IGFBP4	506.489	386.793	177.125	182.948	62455.8	64400.7	446.641	180.037	63428.2	2.48083	1.31082	yes	yes	0.420324	-0.376416	yes
	PPT1	352.697	184.636	73.4172	79.5091	61772.9	64111.7	268.667	76.4632	62942.3	3.51367	1.81298	yes	yes	0.305364	-0.515182	yes
	PRRC2B	328.09	148.248	88.8195	106.527	63745.9	61396.5	238.169	97.6731	62571.2	2.43843	1.28595	yes	yes	0.224538	-0.648711
	GREB1	274.775	92.9921	42.0994	49.4037	64076.8	61056.5	183.884	45.7516	62566.6	4.01918	2.0069	yes	yes	0.220776	-0.656048
	FUS	428.567	225.068	118.597	115.79	61866.5	63032.8	326.818	117.194	62449.6	2.7887	1.47959	yes	yes	0.335669	-0.474089	yes
	FOXA1	285.028	111.86	43.1262	53.2634	62107.1	62416.7	198.444	48.1948	62261.9	4.11754	2.04178	yes	yes	0.241318	-0.61741
	TACSTD2	323.989	164.421	51.8541	72.5617	61468.4	62321.1	244.205	62.2079	61894.8	3.92562	1.97292	yes	yes	0.294042	-0.53159	yes
	UBA1	512.64	266.847	119.11	144.352	62114.8	61018.4	389.744	131.731	61566.6	2.95863	1.56493	yes	yes	0.419079	-0.377704	yes
	NACA	303.483	164.421	72.9038	94.9478	60281.2	62760.1	233.952	83.9258	61520.6	2.7876	1.47903	yes	yes	0.243863	-0.612854
	CCNI	350.646	153.639	64.6893	75.6495	60107.7	62885	252.143	70.1694	61496.4	3.59334	1.84533	yes	yes	0.295909	-0.528842	yes
	TRAF7	340.393	188.68	75.9843	95.7197	60570.4	61058.6	264.536	85.852	60814.5	3.08131	1.62354	yes	yes	0.293819	-0.53192
	EIF1	974.017	836.929	482.603	521.827	58842.3	61031.5	905.473	502.215	59936.9	1.80296	0.850367	yes	yes	0.672805
	HSPA9	467.528	314.017	141.7	176.001	58359.2	60256.8	390.772	158.851	59308	2.46	1.29866	yes	yes	0.391046	-0.407772	yes
	PRDX1	658.23	458.222	224.359	266.317	57897.4	60469.8	558.226	245.338	59183.6	2.27534	1.18608	yes	yes	0.528674	-0.276812	yes
	DDB1	438.82	254.717	117.057	142.036	59155.2	58703.1	346.769	129.546	58929.2	2.67679	1.42051	yes	yes	0.368616	-0.433425	yes
	PLXNB2	344.494	173.855	58.5284	74.1056	60427.5	57418.9	259.175	66.317	58923.2	3.90812	1.96647	yes	yes	0.327303	-0.48505	yes
	PHGDH	266.573	126.685	36.4519	42.4563	58458.7	59370.2	196.629	39.4541	58914.5	4.98374	2.31723	yes	yes	0.266785	-0.573839
	SLC1A5	344.494	223.72	86.2524	108.071	59097.4	58671.6	284.107	97.1615	58884.5	2.92407	1.54798	yes	yes	0.317479	-0.498286	yes
	FLNB	467.528	277.629	128.352	148.983	61817.1	55658.8	372.578	138.667	58737.9	2.68685	1.42591	yes	yes	0.398228	-0.399868	yes
	HMGA1	287.079	184.636	73.4172	106.527	58671.3	58797.6	235.858	89.972	58734.5	2.62145	1.39037	yes	yes	0.248381	-0.604881
	MBTPS1	340.393	183.289	65.7161	81.8249	58261.4	59205.1	261.841	73.7705	58733.2	3.5494	1.82757	yes	yes	0.320211	-0.494563	yes
	LARP1	416.264	210.243	78.0379	128.141	59422.3	57935	313.254	103.089	58678.6	3.03866	1.60343	yes	yes	0.358161	-0.445921	yes
	CLU	479.831	295.149	136.566	156.702	57478.2	59221.4	387.49	146.634	58349.8	2.64256	1.40194	yes	yes	0.412779	-0.384282	yes
	MSI2	371.152	206.2	78.0379	91.0881	57585.3	58938.9	288.676	84.563	58262.1	3.41374	1.77135	yes	yes	0.350335	-0.455516	yes
	SF3B3	490.084	280.324	118.084	167.51	58263.1	58043.6	385.204	142.797	58153.4	2.69757	1.43166	yes	yes	0.416842	-0.380029	yes
	SNHG29	280.927	176.55	77.5245	90.3162	57668.7	58541.2	228.739	83.9203	58104.9	2.72566	1.44661	yes	yes	0.249236	-0.60339
	MT-ND4L	711.545	556.605	515.461	540.353	56905	59259.4	634.075	527.907	58082.2	1.20111	0.264369	yes	yes	0.182789
	TNRC18	280.927	130.728	67.7698	70.2459	59408.7	56051	205.827	69.0078	57729.8	2.98267	1.5766	yes	yes	0.237	-0.625252
	AGRN	332.191	167.116	74.9575	93.4039	59885.8	55440.4	249.654	84.1807	57663.1	2.96569	1.56837	yes	yes	0.286965	-0.542171
	HNRNPC	477.781	338.276	133.999	169.053	55729.6	59526.7	408.028	151.526	57628.2	2.69279	1.4291	yes	yes	0.445098	-0.351544	yes
	RPS15	403.961	254.717	99.601	118.878	57637.2	57615.5	329.339	109.239	57626.4	3.01484	1.59208	yes	yes	0.381943	-0.418002	yes
	NRAS	395.758	202.157	85.2256	96.4917	55700.7	58982.3	298.958	90.8586	57341.5	3.29036	1.71825	yes	yes	0.362911	-0.440199	yes
	HNRNPH1	984.27	688.681	512.38	501.757	57455.2	57209.2	836.475	507.069	57332.2	1.64963	0.722142	yes	yes	0.574558
	EEF1A2	305.534	185.984	71.3636	110.386	56654.9	57753.5	245.759	90.875	57204.2	2.70436	1.43529	yes	yes	0.270756	-0.567422
	SEPTIN9	358.848	218.329	97.5474	108.071	56979.8	57363.5	288.589	102.809	57171.6	2.80704	1.48905	yes	yes	0.324951	-0.488182	yes
	HMGB1	701.292	552.562	354.251	423.019	55018.7	59263.7	626.927	388.635	57141.2	1.61315	0.689881	yes	yes	0.417022
	PLEC	457.275	357.144	153.509	169.825	60250.6	53393.4	407.209	161.667	56822	2.51882	1.33275	yes	yes	0.432125	-0.36439	yes
	SFPQ	367.051	180.593	94.9803	102.667	56750.2	56828.9	273.822	98.8237	56789.5	2.77081	1.47031	yes	yes	0.308152	-0.511235
	G6PD	736.152	698.115	336.282	399.861	56723.8	56715.9	717.133	368.072	56719.9	1.94835	0.962254	yes	yes	0.615413
	DYNLL2	295.281	191.375	70.8502	94.1759	54903.9	57580.8	243.328	82.513	56242.3	2.94896	1.56021	yes	yes	0.285932	-0.543737
	NOP53	217.36	113.208	34.9117	43.2283	55560.4	56778.9	165.284	39.07	56169.7	4.23045	2.08081	yes	yes	0.224701	-0.648395
	DDX17	387.556	152.291	69.31	96.4917	56307.9	55833.7	269.924	82.9008	56070.8	3.25598	1.70309	yes	yes	0.333548	-0.476842	yes
	RPL39	424.466	211.591	106.275	127.369	54515.2	56788.7	318.028	116.822	55652	2.72233	1.44484	yes	yes	0.361544	-0.441839	yes
	CDC42BPB	395.758	194.07	78.5513	94.1759	55485.6	55037.3	294.914	86.3636	55261.4	3.4148	1.7718	yes	yes	0.37739	-0.42321	yes
	PRKCSH	291.18	160.378	73.9306	87.2285	54908.1	55467.5	225.779	80.5796	55187.8	2.80194	1.48642	yes	yes	0.2631	-0.579879
	GRN	356.798	164.421	56.4748	64.8424	55207.5	55036.2	260.609	60.6586	55121.8	4.29633	2.1031	yes	yes	0.362743	-0.440401	yes
	RCC2	326.039	184.636	58.5284	75.6495	55286.6	54582.1	255.338	67.0889	54934.3	3.80596	1.92826	yes	yes	0.34268	-0.465111	yes
	RPL23	440.871	299.192	111.409	136.632	53768.5	55909.7	370.031	124.021	54839.1	2.98362	1.57707	yes	yes	0.448604	-0.348137	yes
	BCAM	250.169	102.426	32.8581	46.316	54956.6	54682	176.297	39.587	54819.3	4.45341	2.15491	yes	yes	0.249383	-0.603132
	EEF1D	285.028	214.286	61.0955	91.0881	54373.2	55002.5	249.657	76.0918	54687.9	3.281	1.71414	yes	yes	0.317374	-0.498428
	PTGES3	422.416	268.195	112.95	166.738	53415.6	55954.3	345.305	139.844	54684.9	2.46922	1.30406	yes	yes	0.375719	-0.425137	yes
	DDX3X	1701.97	1504.05	663.322	643.792	53769.4	55504.5	1603.01	653.557	54636.9	2.45274	1.29439	yes	yes	1.73774	0.239985	yes
	STAT1	344.494	187.332	74.9575	71.7898	53751.5	55388.2	265.913	73.3736	54569.9	3.6241	1.85762	yes	yes	0.352831	-0.452433	yes
	EWSR1	426.517	256.065	134.513	167.51	54172.5	54906.9	341.291	151.011	54539.7	2.26004	1.17635	yes	yes	0.348883	-0.45732	yes
	RBMX	430.618	250.674	112.436	124.281	53386.7	55653.3	340.646	118.359	54520	2.87808	1.52511	yes	yes	0.407717	-0.389641	yes
	PCBP2	365	179.246	80.0915	104.983	54004.1	54850.4	272.123	92.5372	54427.3	2.94068	1.55615	yes	yes	0.329955	-0.481545	yes
	SMARCD2	330.14	153.639	61.6089	88.0004	53756.6	54953.6	241.89	74.8046	54355.1	3.23362	1.69315	yes	yes	0.307395	-0.512303
	ZNF217	311.685	165.769	45.6932	68.7021	54143.6	54421.3	238.727	57.1977	54282.4	4.17372	2.06133	yes	yes	0.334416	-0.475712	yes
	CDV3	412.163	175.203	71.3636	100.351	52909.6	55023.2	293.683	85.8575	53966.4	3.42058	1.77424	yes	yes	0.385101	-0.414425	yes
	LAPTM4B	340.393	173.855	82.1452	85.6846	53125.6	54660.3	257.124	83.9149	53892.9	3.06411	1.61547	yes	yes	0.321395	-0.492961
	CD164	340.393	161.725	69.8234	74.8775	52454.6	54833	251.059	72.3505	53643.8	3.47004	1.79495	yes	yes	0.33314	-0.477374
	PTP4A2	297.331	191.375	64.6893	91.0881	52475.8	54575.5	244.353	77.8887	53525.7	3.13721	1.64948	yes	yes	0.310999	-0.507241
	VMP1	328.09	225.068	89.8463	117.334	53353.5	53687.9	276.579	103.59	53520.7	2.66994	1.41681	yes	yes	0.323219	-0.490504
	MARS1	371.152	157.682	73.4172	87.2285	53635	53321.7	264.417	80.3228	53478.4	3.29193	1.71893	yes	yes	0.34424	-0.463138	yes
	SPINT2	332.191	199.461	73.4172	106.527	53523.6	53343.5	265.826	89.972	53433.5	2.95454	1.56293	yes	yes	0.329108	-0.482661
	FAM102A	233.764	95.6875	39.019	51.7195	53470.9	53255.4	164.726	45.3692	53363.2	3.63078	1.86028	yes	yes	0.223668	-0.650395
	ERGIC1	313.736	175.203	78.0379	86.4565	52277.7	54380	244.469	82.2472	53328.8	2.97237	1.57161	yes	yes	0.304192	-0.516852
	CD24	266.573	183.289	60.0686	74.8775	51999.6	54571.2	224.931	67.4731	53285.4	3.33364	1.7371	yes	yes	0.295499	-0.529444
	TUG1	301.433	157.682	58.5284	68.7021	53087.3	53470.6	229.557	63.6152	53278.9	3.60853	1.85141	yes	yes	0.311459	-0.506599
	KRT80	397.809	246.631	92.4133	132.773	53226.8	53154.4	322.22	112.593	53190.6	2.86181	1.51693	yes	yes	0.394106	-0.404387	yes
	CNBP	549.55	388.141	150.428	177.545	52276.8	54025.8	468.846	163.986	53151.3	2.85905	1.51554	yes	yes	0.573569	-0.241415	yes
	CNOT1	453.174	195.418	94.9803	112.702	52786.3	53265.2	324.296	103.841	53025.7	3.123	1.64293	yes	yes	0.415751	-0.381167	yes
	GSPT1	330.14	216.982	82.1452	121.965	52609.4	53403.2	273.561	102.055	53006.3	2.68052	1.42251	yes	yes	0.323557	-0.490049
	SHMT2	303.483	99.7307	44.153	59.4389	52684.2	52970.8	201.607	51.7959	52827.5	3.89233	1.96063	yes	yes	0.283585	-0.547316
	MT-ND3	621.32	384.098	374.787	403.721	50412.7	55203.5	502.709	389.254	52808.1	1.29147	0.369011	yes	yes	0.214844
	UBC	449.073	270.89	116.543	142.808	53392.6	51789.8	359.982	129.676	52591.2	2.77602	1.47302	yes	yes	0.437917	-0.358608	yes
	NORAD	332.191	203.504	70.8502	81.8249	51584.6	53583.6	267.848	76.3376	52584.1	3.50873	1.81095	yes	yes	0.364198	-0.438662	yes
	H1-10	164.045	113.208	30.8044	50.9476	52209.7	52644.8	138.626	40.876	52427.2	3.39139	1.76187	yes	yes	0.186449	-0.729439
	OGT	334.242	153.639	62.1223	87.2285	53680.9	51149.8	243.94	74.6754	52415.4	3.26668	1.70782	yes	yes	0.32293	-0.490892
	ANXA2	865.337	812.67	361.952	391.37	51395.8	53102.3	839.004	376.661	52249	2.22748	1.15541	yes	yes	0.884882	-0.0531144	yes
	RPL35	412.163	238.545	98.5742	125.825	51424.7	52944.7	325.354	112.2	52184.7	2.89978	1.53594	yes	yes	0.408461	-0.388849	yes
	ARPP19	334.242	172.507	74.9575	105.755	51139.8	53052.3	253.374	90.3562	52096	2.80417	1.48758	yes	yes	0.312919	-0.504569
	COX4I1	268.624	157.682	62.1223	75.6495	51342.2	52731.8	213.153	68.8859	52037	3.09429	1.62961	yes	yes	0.277239	-0.557145
	BSG	303.483	208.895	84.1988	103.439	51607.5	52083.1	256.189	93.8189	51845.3	2.73068	1.44926	yes	yes	0.313182	-0.504203
	SEC61A1	297.331	203.504	96.0072	145.123	51425.5	52198.3	250.418	120.565	51811.9	2.07703	1.05452	yes	yes	0.250623	-0.600979
	ANP32B	358.848	222.372	69.8234	95.7197	49565.6	54032.3	290.61	82.7716	51799	3.51099	1.81188	yes	yes	0.401241	-0.396594	yes
	RPS2P5	86.1236	53.9085	23.1033	30.8773	49808.8	53553.1	70.016	26.9903	51681	2.59412	1.37524	yes	yes	0.0832524	-1.0796
	YWHAB	397.809	211.591	90.3597	121.965	50291.9	52852.4	304.7	106.163	51572.1	2.87012	1.52111	yes	yes	0.38497	-0.414573	yes
	RAC1	403.961	250.674	83.172	100.351	50652.5	52391.7	327.317	91.7617	51522.1	3.56704	1.83473	yes	yes	0.457194	-0.3399	yes
	MTHFD2	334.242	169.812	52.8809	54.0353	49992.5	52693.7	252.027	53.4581	51343.1	4.71447	2.23709	yes	yes	0.386748	-0.412572	yes
	RPS21	342.444	183.289	84.1988	118.106	51468.9	50989	262.866	101.152	51229	2.59872	1.3778	yes	yes	0.315669	-0.500768
	RPS13	401.91	192.723	94.4669	108.071	50354.8	51991.9	297.316	101.269	51173.3	2.93591	1.55381	yes	yes	0.383105	-0.416682	yes
	PTMS	266.573	168.464	66.2295	75.6495	49487.4	52741.5	217.518	70.9395	51114.5	3.06625	1.61648	yes	yes	0.286766	-0.542472
	HNRNPM	434.719	339.623	137.08	155.159	49910	51848.4	387.171	146.119	50879.2	2.64969	1.40583	yes	yes	0.473773	-0.32443	yes
	CD63	440.871	283.019	117.57	148.211	49859	51611.6	361.945	132.891	50735.3	2.72363	1.44553	yes	yes	0.451469	-0.345372	yes
	MCL1	332.191	177.898	68.2832	92.632	50064.8	51192.2	255.044	80.4576	50628.5	3.16992	1.66445	yes	yes	0.344839	-0.462384
	ABAT	282.977	150.944	55.9614	81.053	50239.2	50971.6	216.961	68.5072	50605.4	3.16698	1.66311	yes	yes	0.293355	-0.532607
	RAB7A	401.91	212.938	97.5474	117.334	49676.2	51286.7	307.424	107.441	50481.5	2.86134	1.51669	yes	yes	0.396153	-0.402137	yes
	KPNB1	469.579	397.575	157.103	212.282	49743.4	51130.3	433.577	184.692	50436.8	2.34756	1.23116	yes	yes	0.493458	-0.30675	yes
	UBR5	360.899	163.073	59.5552	77.9653	50864.2	49986.2	261.986	68.7603	50425.2	3.81014	1.92984	yes	yes	0.383193	-0.416583	yes
	ERBB3	293.23	109.165	45.6932	46.316	50534.3	49507.1	201.197	46.0046	50020.7	4.37342	2.12876	yes	yes	0.310257	-0.508278
	TMED10	328.09	164.421	63.1491	94.1759	49453.4	50567.5	246.255	78.6625	50010.4	3.13053	1.64641	yes	yes	0.335116	-0.474805
	CTNNA1	342.444	238.545	96.0072	108.843	49821.6	50085.1	290.494	102.425	49953.3	2.83617	1.50394	yes	yes	0.37649	-0.424246	yes
	FTL	1168.82	1206.2	619.169	565.055	49983.2	49916.7	1187.51	592.112	49949.9	2.00555	1.004	yes	yes	1.19199	0.0762731	yes
	HSPA5	426.517	283.019	115.517	145.895	49370.9	50390.4	354.768	130.706	49880.6	2.71424	1.44055	yes	yes	0.449197	-0.347563	yes
	IARS1	383.455	156.335	74.4441	97.2636	49245	50220.9	269.895	85.8538	49732.9	3.14365	1.65244	yes	yes	0.370058	-0.43173	yes
	PRKDC	438.82	265.499	124.245	121.194	53438.5	45907.5	352.16	122.719	49673	2.86964	1.52087	yes	yes	0.461902	-0.33545	yes
	TOB1	291.18	109.165	49.8005	40.9125	48636.9	50395.8	200.172	45.3565	49516.4	4.41331	2.14186	yes	yes	0.312656	-0.504934
	SF3B2	307.584	214.286	86.2524	108.843	48846.1	50027.5	260.935	97.5475	49436.8	2.67495	1.41951	yes	yes	0.330498	-0.480831
	FAM120A	389.607	199.461	82.6586	99.5794	48987.3	49798.2	294.534	91.119	49392.8	3.23241	1.69261	yes	yes	0.411832	-0.38528	yes
	MLPH	151.742	94.3398	56.9882	57.895	49796.9	48956.2	123.041	57.4416	49376.6	2.14201	1.09897	yes	yes	0.132855	-0.876623
	NMD3	334.242	171.159	57.5016	83.3688	48302.7	50293.7	252.7	70.4352	49298.2	3.5877	1.84306	yes	yes	0.36972	-0.432127	yes
	ZNF664	360.899	156.335	71.877	82.5969	48092.6	50399.1	258.617	77.2369	49245.9	3.34835	1.74345	yes	yes	0.368315	-0.433781	yes
	ATF4	311.685	154.987	46.2067	74.8775	48649.7	49677.6	233.336	60.5421	49163.7	3.85411	1.9464	yes	yes	0.351467	-0.454116
	EIF4H	395.758	237.197	104.735	118.878	47925.1	49324.5	316.478	111.806	48624.8	2.83059	1.5011	yes	yes	0.42092	-0.375801	yes
	PEBP1	291.18	183.289	74.9575	98.0355	48099.5	49058.3	237.234	86.4965	48578.9	2.7427	1.4556	yes	yes	0.310295	-0.508226
	DAZAP2	315.786	134.771	78.0379	77.1933	47666.6	49358.2	225.279	77.6156	48512.4	2.90249	1.53729	yes	yes	0.304382	-0.51658
	MAL2	346.545	142.857	58.5284	75.6495	47452.3	49435.3	244.701	67.0889	48443.8	3.64741	1.86687	yes	yes	0.366636	-0.435765
	OBSL1	219.41	91.6444	40.5592	50.1757	49183.8	47440.5	155.527	45.3674	48312.2	3.42817	1.77744	yes	yes	0.228017	-0.642033
	ATP5MC2	352.697	107.817	71.3636	85.6846	47779.7	48839.9	230.257	78.5241	48309.8	2.93231	1.55204	yes	yes	0.314082	-0.502956
	KIAA1522	307.584	145.553	63.1491	64.8424	48792.6	47599.2	226.569	63.9957	48195.9	3.54037	1.8239	yes	yes	0.337317	-0.471962
	LRATD2	332.191	156.335	54.4212	86.4565	47292.4	48970.3	244.263	70.4388	48131.4	3.46773	1.79399	yes	yes	0.361145	-0.442319
	HNRNPA3	1929.58	1727.77	1225.5	1353.2	46695.4	49522.3	1828.67	1289.35	48108.8	1.41829	0.504151	yes	yes	1.12104
	SF3B1	332.191	202.157	79.0647	93.4039	47696.3	48407.5	267.174	86.2343	48051.9	3.09823	1.63144	yes	yes	0.37655	-0.424177	yes
	PRRC2C	336.292	145.553	59.0418	68.7021	50329.3	45633.7	240.922	63.8719	47981.5	3.77196	1.91531	yes	yes	0.368997	-0.432977
	PPDPF	287.079	126.685	59.0418	61.7547	48090.9	47838.2	206.882	60.3982	47964.6	3.42529	1.77623	yes	yes	0.305399	-0.515132
	SCIN	254.27	110.512	33.3715	54.0353	47482	48169.6	182.391	43.7034	47825.8	4.17338	2.06122	yes	yes	0.289985	-0.537625
	RHOB	291.18	138.814	46.7201	53.2634	47953.2	47680.7	214.997	49.9917	47816.9	4.30065	2.10456	yes	yes	0.345077	-0.462084
	GCN1	305.534	185.984	83.6854	126.597	49668.5	45870.6	245.759	105.141	47769.5	2.33742	1.22492	yes	yes	0.294367	-0.531111
	TRIM33	307.584	130.728	51.8541	60.9827	47717.6	47779.5	219.156	56.4184	47748.6	3.88448	1.95772	yes	yes	0.340822	-0.467472
	EMP2	186.601	109.165	35.9385	51.7195	47333.2	47966.4	147.883	43.829	47649.8	3.37409	1.7545	yes	yes	0.218372	-0.660803
	KPNA2	399.859	264.151	109.356	129.685	47048.3	47942.5	332.005	119.52	47495.4	2.77782	1.47395	yes	yes	0.447381	-0.349323	yes
	PRPF8	418.315	245.284	109.869	136.632	48573.1	46082.4	331.799	123.251	47327.8	2.69207	1.42871	yes	yes	0.440647	-0.355909	yes
	CCT3	401.91	262.804	120.137	145.895	46366.2	48117.4	332.357	133.016	47241.8	2.49862	1.32113	yes	yes	0.421958	-0.374731	yes
	AKT1	270.674	223.72	78.0379	93.4039	47569.6	46710.4	247.197	85.7209	47140	2.88374	1.52794	yes	yes	0.342546	-0.465281
	GSTM3	297.331	107.817	46.7201	67.9301	46481.1	47743.7	202.574	57.3251	47112.4	3.53378	1.82121	yes	yes	0.308304	-0.511022
	RPLP2	344.494	172.507	77.0111	108.843	46440.2	47599.2	258.501	92.9268	47019.7	2.78177	1.476	yes	yes	0.352137	-0.453288
	NUDT21	282.977	145.553	55.448	77.9653	46106	47409	214.265	66.7066	46757.5	3.21205	1.6835	yes	yes	0.315582	-0.500887
	PFN1	533.146	444.745	234.114	266.317	46346.7	46803.9	488.945	250.215	46575.3	1.9541	0.966503	yes	yes	0.512568
	SMG1	280.927	126.685	55.448	59.4389	47855.4	45268.7	203.806	57.4434	46562	3.54794	1.82698	yes	yes	0.314339	-0.502602
	DSTN	455.225	266.847	128.865	139.72	45079.5	47993.6	361.036	134.293	46536.5	2.68843	1.42676	yes	yes	0.487237	-0.31226	yes
	KIAA0100	403.961	216.982	86.7658	99.5794	46308.4	46669.1	310.471	93.1726	46488.8	3.33221	1.73648	yes	yes	0.467421	-0.330291	yes
	HYOU1	258.371	149.596	49.8005	70.2459	47034.7	45877.1	203.983	60.0232	46455.9	3.39841	1.76486	yes	yes	0.309886	-0.508798
	CTDSP2	229.663	134.771	49.2871	70.2459	45652.7	46974.4	182.217	59.7665	46313.6	3.04881	1.60825	yes	yes	0.264394	-0.577748
	MED13L	237.865	132.076	49.8005	57.1231	46489.6	46059.6	184.97	53.4618	46274.6	3.45986	1.79071	yes	yes	0.284192	-0.546388
	IRAK1	326.039	198.114	98.5742	132.001	45652.7	46448.6	262.076	115.287	46050.7	2.27324	1.18475	yes	yes	0.318756	-0.496542
	DDR1	299.382	133.423	51.8541	85.6846	42484	49605.9	216.403	68.7694	46044.9	3.14679	1.65388	yes	yes	0.320629	-0.493997
	RPL35A	367.051	163.073	77.5245	101.123	45200.3	46500.7	265.062	89.3239	45850.5	2.96742	1.56921	yes	yes	0.383285	-0.416479
	DCAF7	262.472	125.337	53.9078	67.1582	45480.1	46178	193.905	60.533	45829.1	3.20329	1.67955	yes	yes	0.29102	-0.536078
	CD9	285.028	129.38	45.1798	63.2985	44530.1	46974.4	207.204	54.2392	45752.3	3.82019	1.93365	yes	yes	0.334333	-0.475821
	TRPM7	260.421	119.946	32.3447	55.5792	44908.6	46442.1	190.184	43.9619	45675.3	4.3261	2.11307	yes	yes	0.320133	-0.494669
	ATP6AP1	198.904	128.033	49.8005	57.895	45335.5	45929.2	163.469	53.8478	45632.4	3.03575	1.60205	yes	yes	0.240226	-0.61938
	MYC	285.028	101.078	36.4519	44.0002	46006.5	45206.7	193.053	40.2261	45606.6	4.79921	2.2628	yes	yes	0.335099	-0.474827
	IGFBP2	244.017	92.9921	42.6128	41.6844	45577.9	45545.7	168.504	42.1486	45561.8	3.99787	1.99923	yes	yes	0.277329	-0.557005
	MYL6	408.062	237.197	109.869	141.264	45031.9	45969.4	322.629	125.566	45500.7	2.56939	1.36143	yes	yes	0.433099	-0.363413	yes
	SF1	268.624	176.55	56.9882	82.5969	45668	45269.7	222.587	69.7925	45468.9	3.18927	1.67322	yes	yes	0.336042	-0.473607
	TKT	473.68	349.057	188.934	204.562	44903.5	45683.7	411.369	196.748	45293.6	2.09084	1.06408	yes	yes	0.473843	-0.324366	yes
	NCOR2	282.977	157.682	61.6089	82.5969	45581.3	44281	220.33	72.1029	44931.2	3.05577	1.61154	yes	yes	0.329898	-0.48162
	AP2M1	360.899	190.027	99.0876	110.386	44037.7	45488.1	275.463	104.737	44762.9	2.63004	1.39509	yes	yes	0.381401	-0.418619
	PTBP1	287.079	229.111	90.8731	101.123	44374.5	45002.5	258.095	95.9982	44688.5	2.68854	1.42682	yes	yes	0.362726	-0.440422
	GDI2	276.826	190.027	73.9306	86.4565	43624.4	45748.9	233.427	80.1936	44686.6	2.91079	1.54141	yes	yes	0.342906	-0.464826
	GRINA	200.955	138.814	38.5055	43.2283	44298.8	44704.8	169.885	40.8669	44501.8	4.15702	2.05555	yes	yes	0.289916	-0.537728
	RAD21	268.624	137.467	59.0418	76.4214	43626.1	45314.3	203.045	67.7316	44470.2	2.99779	1.5839	yes	yes	0.304279	-0.516728
	ABCC5	241.966	123.989	46.2067	49.4037	45041.3	43799.7	182.978	47.8052	44420.5	3.82757	1.93643	yes	yes	0.304303	-0.516694
	ARHGEF12	289.129	136.119	66.7429	73.3337	43996.1	44729.8	212.624	70.0383	44362.9	3.03582	1.60209	yes	yes	0.321408	-0.492944
	SMARCA4	282.977	115.903	47.2335	62.5266	44994.5	43691.1	199.44	54.88	44342.8	3.63411	1.8616	yes	yes	0.326006	-0.486774
	GLG1	274.775	146.901	59.0418	73.3337	45120.3	43310.8	210.838	66.1877	44215.6	3.18545	1.6715	yes	yes	0.327148	-0.485256
	SQSTM1	346.545	301.887	141.187	148.211	44189.1	44219.1	324.216	144.699	44204.1	2.24062	1.1639	yes	yes	0.406109	-0.391357	yes
	OAS3	254.27	103.774	39.019	44.7721	44263.9	43833.4	179.022	41.8955	44048.7	4.27305	2.09527	yes	yes	0.311306	-0.506812
	CCT5	264.522	190.027	97.5474	103.439	43261.3	44781.9	227.275	100.493	44021.6	2.26159	1.17734	yes	yes	0.287999	-0.540609
	CAPN1	268.624	172.507	55.448	73.3337	44120.2	43831.2	220.565	64.3908	43975.7	3.42542	1.77628	yes	yes	0.355138	-0.449603
	RAB1B	282.977	191.375	64.1759	91.8601	43703.5	44148.5	237.176	78.018	43926	3.04002	1.60408	yes	yes	0.362333	-0.440892
	S100A10	282.977	233.154	109.356	121.194	43138	44615.7	258.066	115.275	43876.8	2.2387	1.16266	yes	yes	0.325436	-0.487534
	INPPL1	276.826	144.205	56.9882	74.8775	44689.2	42876.2	210.515	65.9329	43782.7	3.19288	1.67486	yes	yes	0.330228	-0.481186
	MED13	330.14	148.248	49.8005	60.2108	44246.9	43256.5	239.194	55.0057	43751.7	4.34854	2.12053	yes	yes	0.420986	-0.375732	yes
	SERF2	287.079	171.159	67.2563	81.8249	42688.9	44627.6	229.119	74.5406	43658.3	3.07375	1.62	yes	yes	0.354064	-0.450918
	MORF4L2	293.23	185.984	64.1759	92.632	42819	44426.6	239.607	78.404	43622.8	3.05606	1.61167	yes	yes	0.369539	-0.43234
	RPS29	356.798	167.116	76.4977	84.9127	43779.2	43115.2	261.957	80.7052	43447.2	3.24585	1.6986	yes	yes	0.417177	-0.37968	yes
	HSPB8	215.309	106.469	38.5055	53.2634	42925.3	43789.9	160.889	45.8845	43357.6	3.5064	1.80999	yes	yes	0.265246	-0.57635
	NUP210	289.129	153.639	65.7161	84.1407	44754.7	41906	221.384	74.9284	43330.3	2.95461	1.56297	yes	yes	0.337998	-0.471085
	VCP	385.506	304.583	133.999	156.702	43571.7	42905.5	345.044	145.351	43238.6	2.37387	1.24724	yes	yes	0.46184	-0.335508	yes
	BMP7	289.129	191.375	93.9535	129.685	43162.6	43314.1	240.252	111.819	43238.3	2.14858	1.10338	yes	yes	0.297035	-0.527193
	RPL9	295.281	172.507	60.0686	74.1056	42649	43631.3	233.894	67.0871	43140.1	3.48642	1.80175	yes	yes	0.386663	-0.412668
	AHCY	272.725	160.378	70.8502	86.4565	42779.1	43437.9	216.551	78.6534	43108.5	2.75323	1.46113	yes	yes	0.319886	-0.495005
	SEPTIN2	299.382	184.636	88.306	85.6846	41901.4	43920.3	242.009	86.9953	42910.9	2.78186	1.47605	yes	yes	0.361246	-0.442197
	NSD2	252.219	171.159	60.0686	74.8775	42613.2	43060.9	211.689	67.4731	42837.1	3.13739	1.64956	yes	yes	0.336662	-0.472806
	GNS	299.382	103.774	53.3944	70.2459	42793.5	42753.4	201.578	61.8201	42773.5	3.26072	1.70519	yes	yes	0.326739	-0.485799
	CACNG4	250.169	148.248	61.6089	69.474	42546.9	42957.7	199.208	65.5414	42752.3	3.03943	1.6038	yes	yes	0.312654	-0.504935
	UBB	338.343	200.809	103.195	115.79	44198.5	41288.8	269.576	109.492	42743.6	2.46205	1.29986	yes	yes	0.37452	-0.426525
	YBX3	266.573	149.596	60.0686	71.0179	42226.3	43165.2	208.084	65.5433	42695.7	3.17477	1.66665	yes	yes	0.333854	-0.476444
	ATP2A2	426.517	331.537	156.076	165.194	42972.1	42221	379.027	160.635	42596.6	2.35956	1.23852	yes	yes	0.512699	-0.290138	yes
	CAND1	268.624	165.769	70.3368	91.8601	42047.7	42957.7	217.196	81.0984	42502.7	2.67818	1.42125	yes	yes	0.320209	-0.494566
	HK1	254.27	134.771	57.5016	77.1933	42199.9	42766.5	194.52	67.3475	42483.2	2.88831	1.53023	yes	yes	0.299349	-0.523822
	RPL27	299.382	196.766	87.2792	125.053	41513.6	43273.9	248.074	106.166	42393.7	2.33666	1.22445	yes	yes	0.334738	-0.475296
	BCL9L	305.534	210.243	82.1452	106.527	42956	41292.1	257.888	94.336	42124	2.73372	1.45087	yes	yes	0.388264	-0.410873
	SRSF3	321.938	250.674	110.383	118.878	41272.9	42824	286.306	114.63	42048.5	2.49765	1.32057	yes	yes	0.408281	-0.389041
	RPS28	266.573	148.248	54.9346	72.5617	41591	42500.3	207.411	63.7482	42045.6	3.25359	1.70203	yes	yes	0.341682	-0.466378
	MYO5C	207.107	101.078	44.6664	50.9476	41591.8	42372.1	154.093	47.807	41982	3.22322	1.6885	yes	yes	0.25317	-0.596589
	CAPRIN1	397.809	283.019	159.156	194.527	41470.2	42436.2	340.414	176.842	41953.2	1.92497	0.944832	yes	yes	0.389893
	PTPN11	375.253	196.766	72.3904	96.4917	41095.2	42601.3	286.009	84.441	41848.3	3.38709	1.76005	yes	yes	0.481665	-0.317255	yes
	LLGL2	227.612	119.946	51.8541	74.8775	42539.2	40969.4	173.779	63.3658	41754.3	2.74248	1.45548	yes	yes	0.264436	-0.577679
	LRPPRC	313.736	173.855	71.3636	88.7723	41279.7	42013.5	243.795	80.068	41646.6	3.04486	1.60637	yes	yes	0.393135	-0.405459
	MATR3	553.652	388.141	244.382	243.159	40528.8	42369.9	470.896	243.77	41449.3	1.93172	0.949886	yes	yes	0.54796
	RNPS1	291.18	185.984	76.4977	76.4214	41204	41653.9	238.582	76.4595	41429	3.12037	1.64172	yes	yes	0.391326	-0.407461
	CLCN7	229.663	68.7333	38.5055	42.4563	42427.8	40395.7	149.198	40.4809	41411.8	3.68564	1.88191	yes	yes	0.262527	-0.580826
	KMT2D	211.208	129.38	43.6396	61.7547	44132.1	38643.2	170.294	52.6971	41387.7	3.23156	1.69223	yes	yes	0.284135	-0.546475
	PXN	270.674	204.852	78.5513	106.527	41577.4	41182.4	237.763	92.5391	41379.9	2.56933	1.36139	yes	yes	0.350953	-0.454751
	LMNA	307.584	200.809	102.168	105.755	41199.8	41272.5	254.197	103.961	41236.2	2.4451	1.2899	yes	yes	0.364329	-0.438507
	MLEC	278.876	185.984	73.9306	91.0881	40828.1	41555	232.43	82.5094	41191.6	2.81702	1.49417	yes	yes	0.36396	-0.438946
	PCBP1	307.584	266.847	91.8999	97.2636	40490.5	41835.3	287.216	94.5817	41162.9	3.03669	1.6025	yes	yes	0.467979	-0.329774	yes
	JUP	244.017	146.901	60.5821	77.9653	41566.3	40744.5	195.459	69.2737	41155.4	2.82154	1.49648	yes	yes	0.306606	-0.513419
	PPP2R1A	336.292	216.982	90.3597	108.071	40662.3	41590.9	276.637	99.2152	41126.6	2.78825	1.47936	yes	yes	0.431404	-0.365116
	EEF1B2	362.949	187.332	96.5206	115.79	40291.5	41917.9	275.141	106.155	41104.7	2.59187	1.37399	yes	yes	0.411109	-0.386043
	TTC3	282.977	111.86	41.0726	55.5792	39951.3	42165.6	197.419	48.3259	41058.5	4.08516	2.03039	yes	yes	0.363123	-0.439946
	SYNCRIP	479.831	309.974	157.103	184.492	40187.8	41838.6	394.903	170.797	41013.2	2.31211	1.20921	yes	yes	0.546422	-0.262472	yes
	CLIC4	235.815	107.817	35.9385	47.0879	40112.1	41877.7	171.816	41.5132	40994.9	4.13882	2.04922	yes	yes	0.317851	-0.497777
	TOP2A	323.989	190.027	80.0915	71.0179	40825.6	40704.3	257.008	75.5547	40765	3.40162	1.76622	yes	yes	0.445121	-0.351522	yes
	IGFBP5	246.067	105.122	50.3139	65.6143	40489.7	40813	175.594	57.9641	40651.3	3.02936	1.59902	yes	yes	0.289364	-0.538555
	PRDX6	303.483	171.159	82.6586	98.8075	40054.2	41211.7	237.321	90.733	40633	2.6156	1.38714	yes	yes	0.360762	-0.442779
	CKAP5	262.472	129.38	59.0418	69.474	41236.4	40011.1	195.926	64.2579	40623.7	3.04906	1.60836	yes	yes	0.324116	-0.489299
	MAT2A	613.118	433.963	198.175	229.264	40840.9	40394.7	523.541	213.72	40617.8	2.44966	1.29258	yes	yes	0.762771	-0.117606	yes
	SETD5	323.989	207.548	113.976	117.334	40553.5	40544.6	265.768	115.655	40549	2.29794	1.20034	yes	yes	0.370201	-0.431562
	CDK4	272.725	185.984	67.2563	95.7197	40077.2	41015	229.354	81.488	40546.1	2.81458	1.49292	yes	yes	0.364687	-0.43808
	HECTD1	307.584	176.55	67.2563	87.2285	40200.5	40283.8	242.067	77.2424	40242.2	3.13386	1.64794	yes	yes	0.409582	-0.387659
	DHCR24	311.685	210.243	90.3597	136.632	39876.5	40578.3	260.964	113.496	40227.4	2.29933	1.20121	yes	yes	0.366587	-0.435823
	IPO7	287.079	185.984	75.4709	74.8775	38758.2	41388.8	236.531	75.1742	40073.5	3.14644	1.65372	yes	yes	0.402653	-0.395069
	RSL1D1	313.736	154.987	70.3368	87.2285	38991.2	41091.1	234.361	78.7826	40041.1	2.97478	1.57279	yes	yes	0.388547	-0.410556
	ATXN7L3B	186.601	82.2104	39.019	58.6669	39225.9	40803.2	134.406	48.8429	40014.5	2.75179	1.46037	yes	yes	0.213829	-0.669933
	RBM39	295.281	177.898	97.034	118.878	39650.3	39824.2	236.589	107.956	39737.3	2.19154	1.13194	yes	yes	0.32371	-0.489844
	PAPOLA	389.607	252.022	102.168	148.211	38433.3	40957.5	320.814	125.19	39695.4	2.56263	1.35762	yes	yes	0.492815	-0.307316	yes
	ARMT1	233.764	101.078	45.6932	52.4915	38549	40751	167.421	49.0924	39650	3.41033	1.76991	yes	yes	0.298433	-0.525152
	S100A11	282.977	210.243	75.9843	90.3162	39426.6	39749.3	246.61	83.1502	39587.9	2.96584	1.56844	yes	yes	0.412903	-0.384151
	CENPB	383.455	278.976	84.1988	98.8075	38974.2	40163.2	331.216	91.5031	39568.7	3.61972	1.85588	yes	yes	0.605813	-0.217661	yes
	EIF3H	291.18	134.771	58.5284	57.1231	38778.6	40330.6	212.975	57.8257	39554.6	3.68306	1.8809	yes	yes	0.392242	-0.406446
	PKD1	227.612	103.774	36.9653	44.0002	41352.9	37745.8	165.693	40.4828	39549.3	4.09293	2.03313	yes	yes	0.316593	-0.499499
	MTDH	416.264	253.37	116.03	113.474	38916.3	39968.7	334.817	114.752	39442.5	2.91774	1.54485	yes	yes	0.557937	-0.253414	yes
	SCARB2	190.702	98.3829	44.153	54.8073	38673.1	40099.1	144.543	49.4801	39386.1	2.92122	1.54657	yes	yes	0.24136	-0.617334
	PGK1	383.455	273.585	125.785	138.176	38916.3	39643.9	328.52	131.98	39280.1	2.48916	1.31566	yes	yes	0.500354	-0.300722	yes
	UBA52	254.27	171.159	69.8234	106.527	38808.3	39746	212.715	88.1751	39277.2	2.41241	1.27048	yes	yes	0.317078	-0.498834
	APH1A	285.028	154.987	67.2563	81.053	38786.2	39672.1	220.007	74.1547	39229.2	2.96687	1.56894	yes	yes	0.371797	-0.429695
	ENSA	285.028	173.855	69.8234	106.527	38383.1	39994.8	229.441	88.1751	39189	2.60211	1.37968	yes	yes	0.360475	-0.443125
	EPRS1	260.421	136.119	62.6357	64.0705	39013.3	39359.2	198.27	63.3531	39186.3	3.1296	1.64598	yes	yes	0.344297	-0.463067
	SRSF9	293.23	172.507	72.9038	110.386	38519.2	39727.5	232.869	91.6451	39123.4	2.54098	1.34539	yes	yes	0.36097	-0.442529
	GLUL	159.944	101.078	36.4519	44.0002	38856.8	39300.6	130.511	40.2261	39078.7	3.24444	1.69797	yes	yes	0.231034	-0.636324
	JPT2	276.826	140.162	62.1223	94.9478	38607.6	39515.7	208.494	78.535	39061.7	2.65479	1.4086	yes	yes	0.332702	-0.477945
	EIF4A2	705.393	483.828	191.501	205.334	38514.9	39598.3	594.611	198.418	39056.6	2.99676	1.58341	yes	yes	1.01441	0.00621265	yes
	L1CAM	280.927	167.116	59.5552	88.7723	40186.9	37922.9	224.022	74.1638	39054.9	3.02063	1.59485	yes	yes	0.383711	-0.415996
	INTS1	244.017	125.337	52.8809	89.5443	40004.1	37871.8	184.677	71.2126	38937.9	2.59332	1.3748	yes	yes	0.291398	-0.535513
	BCAP31	254.27	152.291	74.9575	94.9478	38310	39525.5	203.281	84.9526	38917.7	2.39287	1.25874	yes	yes	0.304046	-0.51706
	DDX42	223.511	119.946	55.9614	64.8424	38783.7	38832.3	171.729	60.4019	38808	2.8431	1.50747	yes	yes	0.286866	-0.542321
	ATP5F1A	319.888	192.723	90.8731	111.158	38554.9	39030	256.305	101.016	38792.5	2.53728	1.34328	yes	yes	0.400308	-0.397605
	PHB2	268.624	196.766	82.1452	78.7372	38270	39078.9	232.695	80.4412	38674.5	2.89273	1.53243	yes	yes	0.39368	-0.404857
	LDOC1	260.421	87.6013	39.5324	45.5441	38241.9	39098.5	174.011	42.5382	38670.2	4.09071	2.03235	yes	yes	0.339985	-0.46854
	FGD5-AS1	229.663	101.078	45.1798	61.7547	37931.5	39225.6	165.371	53.4673	38578.6	3.09293	1.62898	yes	yes	0.290066	-0.537503
	EIF5A	305.534	315.365	130.919	143.58	38573.6	38425.9	310.449	137.249	38499.8	2.26194	1.17756	yes	yes	0.449872	-0.346911
	BPTF	256.32	118.599	34.9117	50.9476	39143.4	37851.2	187.459	42.9296	38497.3	4.36667	2.12653	yes	yes	0.375428	-0.425473
	CHD3	237.865	122.642	45.6932	71.0179	38455.4	38494.4	180.253	58.3556	38474.9	3.08888	1.62708	yes	yes	0.316824	-0.499181
	CYB561	213.258	129.38	49.2871	78.7372	38161.2	38780.1	171.319	64.0121	38470.6	2.67636	1.42027	yes	yes	0.278933	-0.554501
	CHCHD2	188.652	140.162	48.2603	70.2459	38369.5	38470.5	164.407	59.2531	38420	2.77465	1.47231	yes	yes	0.273695	-0.562733
	TRIM25	186.601	102.426	49.2871	50.1757	38046.3	38733.4	144.514	49.7314	38389.9	2.90588	1.53898	yes	yes	0.246894	-0.60749
	CACNA1H	178.399	111.86	48.2603	68.7021	39224.2	37491.5	145.129	58.4812	38357.9	2.48164	1.3113	yes	yes	0.225894	-0.646095
	MKI67	326.039	187.332	92.4133	79.5091	40126.5	36464.8	256.686	85.9612	38295.7	2.98606	1.57824	yes	yes	0.445806	-0.350854
	RAD23B	264.522	173.855	72.9038	101.895	36996	39379.9	219.189	87.3995	38188	2.50789	1.32648	yes	yes	0.345106	-0.462047
	EZR	330.14	215.634	78.5513	111.93	37773.4	38587.8	272.887	95.2408	38180.6	2.86523	1.51865	yes	yes	0.465279	-0.332286
	PABPC4	270.674	140.162	62.1223	75.6495	37828.6	38473.7	205.418	68.8859	38151.2	2.98201	1.57628	yes	yes	0.357871	-0.446273
	PRKAR1A	246.067	128.033	48.7737	69.474	37120.2	39047.4	187.05	59.1238	38083.8	3.1637	1.66161	yes	yes	0.335907	-0.473781
	TUBA1C	444.972	365.23	165.831	228.492	37715.5	38183.6	405.101	197.161	37949.6	2.05467	1.0389	yes	yes	0.547936	-0.26127	yes
	MYL12A	252.219	153.639	65.2027	95.7197	37145.7	38700.8	202.929	80.4612	37923.3	2.52207	1.33461	yes	yes	0.322936	-0.490884
	ITGB1	356.798	257.413	136.053	169.825	37166.1	38651.9	307.105	152.939	37909	2.00802	1.00578	yes	yes	0.406674	-0.390754
	DDIT4	168.146	101.078	43.1262	38.5967	37464.6	38289	134.612	40.8614	37876.8	3.29436	1.72	yes	yes	0.247515	-0.606399
	MYO1B	266.573	141.51	80.6049	96.4917	37666.2	38059.8	204.041	88.5483	37863	2.30429	1.20433	yes	yes	0.305029	-0.515659
	XRCC5	311.685	230.459	96.5206	117.334	37205.3	38301	271.072	106.927	37753.1	2.53511	1.34205	yes	yes	0.434785	-0.361726
	ARHGAP35	252.219	152.291	59.5552	60.9827	37799.7	37692.6	202.255	60.269	37746.1	3.35588	1.74669	yes	yes	0.376161	-0.424626
	CCT2	326.039	234.502	110.383	144.352	37115.1	38370.5	280.271	127.367	37742.8	2.2005	1.13783	yes	yes	0.40512	-0.392417
	NOTCH2	285.028	138.814	52.3675	68.7021	39136.6	36302.9	211.921	60.5348	37719.8	3.50082	1.80769	yes	yes	0.401345	-0.396482
	RPN2	289.129	187.332	74.4441	99.5794	37354.1	37983.7	238.231	87.0117	37668.9	2.73791	1.45308	yes	yes	0.401442	-0.396377
	ASS1	213.258	92.9921	33.8849	52.4915	37192.5	37829.4	153.125	43.1882	37511	3.54554	1.826	yes	yes	0.29308	-0.533014
	DKK1	293.23	165.769	68.2832	86.4565	37364.3	37654.5	229.499	77.3698	37509.4	2.96626	1.56865	yes	yes	0.405577	-0.391927
	ZMYND8	244.017	140.162	46.2067	65.6143	37590.5	37243.8	192.089	55.9105	37417.2	3.43566	1.78059	yes	yes	0.363948	-0.438961
	OS9	219.41	121.294	50.8273	57.895	37193.3	37581.7	170.352	54.3612	37387.5	3.13371	1.64787	yes	yes	0.310239	-0.508303
	WDR6	225.562	130.728	48.2603	78.7372	37782.7	36957	178.145	63.4987	37369.9	2.80549	1.48825	yes	yes	0.306788	-0.513162
	KTN1	309.635	175.203	78.0379	91.8601	36541.1	38170.6	242.419	84.949	37355.8	2.8537	1.51283	yes	yes	0.42154	-0.375162
	SLC7A1	145.59	64.6902	34.3983	44.0002	37508	36977.6	105.14	39.1992	37242.8	2.6822	1.42341	yes	yes	0.177056	-0.751889
	RPL34	274.775	133.423	65.7161	71.7898	36882.9	37426.4	204.099	68.753	37154.6	2.96859	1.56978	yes	yes	0.364278	-0.438566
	APEX1	209.157	134.771	47.2335	60.9827	36414.3	37878.3	171.964	54.1081	37146.3	3.17816	1.66819	yes	yes	0.317275	-0.498564
	GNB1	272.725	196.766	75.9843	101.123	36466.2	37821.8	234.745	88.5538	37144	2.65088	1.40647	yes	yes	0.39358	-0.404967
	STAG2	215.309	129.38	56.4748	61.7547	36226.4	37940.3	172.345	59.1147	37083.3	2.91543	1.54371	yes	yes	0.305339	-0.515218
	KARS1	289.129	161.725	68.7966	84.9127	36290.2	37719.7	225.427	76.8546	37004.9	2.93317	1.55246	yes	yes	0.401494	-0.396321
	RSL24D1	215.309	121.294	37.4787	40.1405	35597.1	38320.5	168.302	38.8096	36958.8	4.33659	2.11656	yes	yes	0.350368	-0.455475
	DDOST	246.067	105.122	49.2871	55.5792	36608.2	37255.8	175.594	52.4331	36932	3.34892	1.7437	yes	yes	0.333481	-0.476929
	ESRP2	235.815	129.38	51.8541	77.1933	37677.3	36132.3	182.597	64.5237	36904.8	2.82993	1.50076	yes	yes	0.319941	-0.49493
	SLC39A8	237.865	115.903	46.2067	57.1231	36223.8	37560	176.884	51.6649	36891.9	3.42368	1.77555	yes	yes	0.339422	-0.46926
	CCT7	360.899	250.674	128.865	147.439	36092.9	37618.7	305.787	138.152	36855.8	2.2134	1.14627	yes	yes	0.454839	-0.342142
	LDHA	453.174	412.4	221.279	225.405	36223.8	37400.3	432.787	223.342	36812.1	1.93778	0.954405	yes	yes	0.568959
	PPL	139.438	82.2104	37.4787	53.2634	37832	35705.4	110.824	45.3711	36768.7	2.44262	1.28843	yes	yes	0.178013	-0.749547
	SLC25A39	200.955	113.208	48.2603	83.3688	36798.7	36668	157.081	65.8145	36733.4	2.38673	1.25503	yes	yes	0.248458	-0.604748
	H1-0	120.983	79.515	32.8581	21.6141	35765.5	37674.1	100.249	27.2361	36719.8	3.68074	1.88	yes	yes	0.198838	-0.7015
	THOC7	252.219	111.86	43.6396	62.5266	35785	37555.7	182.04	53.0831	36670.3	3.42933	1.77793	yes	yes	0.351664	-0.453872
	RHOBTB3	231.713	118.599	57.5016	64.0705	36025.7	37227.5	175.156	60.786	36626.6	2.88152	1.52683	yes	yes	0.312259	-0.505485
	MCM7	354.747	264.151	92.4133	166.738	36647.4	36515.9	309.449	129.575	36581.6	2.38818	1.25591	yes	yes	0.491706	-0.308295	yes
	KHSRP	233.764	122.642	50.3139	67.9301	36619.3	36476.8	178.203	59.122	36548	3.01415	1.59175	yes	yes	0.32582	-0.487022
	AMFR	237.865	115.903	44.6664	60.2108	36286.8	36653.9	176.884	52.4386	36470.3	3.37317	1.7541	yes	yes	0.341224	-0.46696
	REEP5	211.208	113.208	45.6932	49.4037	35466.1	37206.9	162.208	47.5485	36336.5	3.41142	1.77037	yes	yes	0.315549	-0.500934
	CELSR2	170.197	136.119	50.3139	72.5617	37747.8	34822	153.158	61.4378	36284.9	2.49289	1.31782	yes	yes	0.252777	-0.597263
	ACTR2	266.573	136.119	55.9614	68.7021	35344.5	37221	201.346	62.3317	36282.7	3.23023	1.69164	yes	yes	0.383141	-0.416641
	KHDRBS1	196.854	119.946	55.9614	84.9127	35758.6	36653.9	158.4	70.437	36206.3	2.24882	1.16917	yes	yes	0.24295	-0.614483
	PIK3R1	207.107	79.515	30.8044	44.7721	35564.7	36665.8	143.311	37.7883	36115.3	3.79247	1.92314	yes	yes	0.292183	-0.534346
	IMPDH2	211.208	130.728	46.2067	58.6669	35465.2	36754.9	170.968	52.4368	36110.1	3.26046	1.70507	yes	yes	0.328249	-0.483796
	TMPO	260.421	168.464	72.9038	69.474	35622.6	36549.6	214.443	71.1889	36086.1	3.0123	1.59087	yes	yes	0.396978	-0.401234
	TUFM	252.219	172.507	74.9575	96.4917	35864.1	36284.5	212.363	85.7246	36074.3	2.47727	1.30875	yes	yes	0.351049	-0.454632
	ATN1	221.461	117.251	61.6089	66.3863	36600.6	35417.4	169.356	63.9976	36009	2.64628	1.40397	yes	yes	0.292588	-0.533743
	ARCN1	270.674	163.073	69.8234	80.2811	35181.2	36744	216.874	75.0522	35962.6	2.88964	1.53089	yes	yes	0.394358	-0.40411
	TMEM30A	166.095	102.426	36.4519	39.3686	35469.5	36419.2	134.261	37.9103	35944.3	3.54154	1.82438	yes	yes	0.268055	-0.571776
	UBE2I	168.146	101.078	40.0458	62.5266	34865.7	36998.3	134.612	51.2862	35932	2.62473	1.39217	yes	yes	0.231899	-0.634701
	GARS1	213.258	122.642	47.2335	67.1582	35293.5	36517	167.95	57.1958	35905.2	2.9364	1.55405	yes	yes	0.308463	-0.510797
	LAMA5	161.994	121.294	67.2563	78.7372	38612.7	33129.3	141.644	72.9968	35871	1.94042	0.956367	yes	yes	0.191373
	DDX6	223.511	105.122	42.0994	53.2634	35541.8	36145.4	164.316	47.6814	35843.6	3.44613	1.78498	yes	yes	0.3254	-0.487583
	HNRNPAB	360.899	250.674	118.597	155.159	35180.3	36396.4	305.787	136.878	35788.4	2.23401	1.15964	yes	yes	0.471966	-0.32609
	YARS1	203.006	114.555	40.5592	54.0353	35434.6	36086.7	158.781	47.2973	35760.7	3.35708	1.74721	yes	yes	0.311748	-0.506196
	ZDHHC7	211.208	118.599	41.0726	57.1231	35253.5	36245.3	164.903	49.0978	35749.4	3.35867	1.74789	yes	yes	0.323937	-0.48954
	PSMC5	280.927	142.857	68.2832	87.2285	35176.1	36194.3	211.892	77.7558	35685.2	2.7251	1.44631	yes	yes	0.375888	-0.424941
	YY1	239.916	134.771	68.7966	74.8775	35233.9	36062.8	187.343	71.8371	35648.4	2.60789	1.38289	yes	yes	0.324016	-0.489434
	U2AF2	241.966	136.119	67.7698	94.1759	35562.2	35628.2	189.043	80.9728	35595.2	2.33464	1.2232	yes	yes	0.303608	-0.517687
	PRDX2	274.775	122.642	64.1759	64.0705	35409.1	35745.6	198.709	64.1232	35577.3	3.09886	1.63174	yes	yes	0.378289	-0.422176
	CS	252.219	200.809	87.2792	108.843	34856.3	36236.7	226.514	98.0609	35546.5	2.30993	1.20785	yes	yes	0.361367	-0.442052
	RPL7L1	190.702	103.774	36.9653	61.7547	34903.1	35902	147.238	49.36	35402.6	2.98294	1.57674	yes	yes	0.276472	-0.558349
	CBX6	174.298	103.774	37.9921	52.4915	35540.1	35200.1	139.036	45.2418	35370.1	3.07317	1.61973	yes	yes	0.265179	-0.576462
	CCDC47	200.955	115.903	47.7469	56.3511	34563.8	35957.4	158.429	52.049	35260.6	3.04385	1.6059	yes	yes	0.301697	-0.520429
	SPTAN1	225.562	138.814	69.31	77.9653	36617.6	33771.4	182.188	73.6376	35194.5	2.47412	1.30691	yes	yes	0.30843	-0.510843
	PAIP1	229.663	119.946	46.7201	50.1757	34346.1	35980.2	174.805	48.4479	35163.2	3.6081	1.85124	yes	yes	0.359344	-0.444489
	SH3GLB2	164.045	106.469	35.9385	38.5967	35398.1	34803.6	135.257	37.2676	35100.8	3.62935	1.85971	yes	yes	0.279166	-0.554138
	MLF2	213.258	130.728	54.4212	78.7372	34958.4	35191.4	171.993	66.5792	35074.9	2.58329	1.36921	yes	yes	0.30054	-0.522098
	RBM8A	221.461	117.251	56.4748	57.1231	34185.3	35836.8	169.356	56.7989	35011.1	2.98167	1.57612	yes	yes	0.321489	-0.492834
	ESYT1	250.169	132.076	56.9882	76.4214	34891.2	34952.4	191.122	66.7048	34921.8	2.86519	1.51863	yes	yes	0.356274	-0.448216
	EPCAM	233.764	97.0352	47.7469	51.7195	34403	35407.7	165.4	49.7332	34905.3	3.32574	1.73367	yes	yes	0.331372	-0.479685
	YME1L1	250.169	136.119	71.3636	78.7372	34204.9	35542.4	193.144	75.0504	34873.6	2.57352	1.36374	yes	yes	0.338632	-0.470272
	TPR	235.815	115.903	47.7469	57.895	35817.3	33802.9	175.859	52.8209	34810.1	3.32934	1.73524	yes	yes	0.353455	-0.451666
	TOP1	258.371	150.944	73.4172	92.632	34240.6	35349	204.657	83.0246	34794.8	2.46502	1.3016	yes	yes	0.349571	-0.456464
	MTCH1	235.815	154.987	61.0955	72.5617	34557.8	34939.4	195.401	66.8286	34748.6	2.92391	1.5479	yes	yes	0.370007	-0.431791
	MARCHF6	221.461	88.949	44.6664	54.0353	34913.3	34527.6	155.205	49.3509	34720.5	3.14492	1.65303	yes	yes	0.304875	-0.515878
	XPO1	235.815	168.464	74.4441	91.0881	34614.8	34803.6	202.139	82.7661	34709.2	2.4423	1.28824	yes	yes	0.343924	-0.463538
	GNB2	231.713	132.076	60.5821	87.2285	34158.1	35244.7	181.895	73.9053	34701.4	2.46119	1.29935	yes	yes	0.311196	-0.506966
	WARS1	217.36	87.6013	46.7201	50.9476	34084.1	35139.3	152.48	48.8338	34611.7	3.12243	1.64267	yes	yes	0.299455	-0.523668
	MAVS	192.753	79.515	44.153	47.0879	34457.5	34560.2	136.134	45.6205	34508.8	2.98405	1.57727	yes	yes	0.262291	-0.581217
	RBL2	176.348	70.081	24.1301	26.2457	34301.8	34711.2	123.215	25.1879	34506.5	4.89181	2.29037	yes	yes	0.284082	-0.546557
	HNRNPH3	381.404	204.852	139.133	183.72	33233.7	35718.4	293.128	161.427	34476	1.81586	0.860653	yes	yes	0.382009
	NR2F2	178.399	92.9921	36.9653	33.9651	34346.9	34490.7	135.695	35.4652	34418.8	3.82616	1.9359	yes	yes	0.291208	-0.535797
	SLC44A1	235.815	79.515	37.4787	48.6318	33960.8	34690.6	157.665	43.0553	34325.7	3.66192	1.8726	yes	yes	0.333888	-0.476399
	PRPF6	186.601	99.7307	39.5324	40.9125	34073.9	34550.4	143.166	40.2224	34312.2	3.55936	1.83162	yes	yes	0.30002	-0.522849
	HNRNPD	438.82	339.623	182.773	258.598	33143.5	35388.1	389.222	220.685	34265.8	1.7637	0.818602	yes	yes	0.49185
	MYH14	190.702	126.685	43.1262	49.4037	34784.9	33674.7	158.694	46.265	34229.8	3.4301	1.77825	yes	yes	0.328452	-0.483528
	HNRNPA0	221.461	138.814	60.0686	77.1933	33357.8	34998.1	180.137	68.631	34177.9	2.62472	1.39217	yes	yes	0.326253	-0.486446
	ATXN2L	280.927	175.203	101.141	105.755	34619.9	33680.1	228.065	103.448	34150	2.20463	1.14054	yes	yes	0.36491	-0.437815
	LAMP2	217.36	99.7307	36.9653	61.7547	33807.7	34477.6	158.545	49.36	34142.7	3.21202	1.68348	yes	yes	0.319791	-0.495134
	VPS51	174.298	86.2535	21.5631	50.9476	34286.5	33992	130.276	36.2554	34139.2	3.59328	1.8453	yes	yes	0.275402	-0.560032
	NELFCD	229.663	137.467	42.0994	69.474	33814.5	34420	183.565	55.7867	34117.3	3.29048	1.7183	yes	yes	0.374526	-0.426518
	FAM234A	182.5	114.555	45.1798	58.6669	34301	33918.1	148.528	51.9234	34109.5	2.86052	1.51628	yes	yes	0.283218	-0.547879
	FKBP8	192.753	92.9921	41.0726	35.5089	34178.5	34028.9	142.872	38.2908	34103.7	3.73125	1.89966	yes	yes	0.306658	-0.513346
	SERP1	174.298	102.426	39.5324	41.6844	33212.4	34982.8	138.362	40.6084	34097.6	3.40723	1.7686	yes	yes	0.286687	-0.542592
	TMEM164	196.854	132.076	52.3675	56.3511	33784.8	34262.5	164.465	54.3593	34023.6	3.02551	1.59718	yes	yes	0.323615	-0.489972
	RPL36	254.27	133.423	56.9882	71.0179	33689.5	34269	193.847	64.003	33979.3	3.02871	1.5987	yes	yes	0.382126	-0.417794
	RPL38	287.079	181.941	79.0647	84.1407	33765.2	34181	234.51	81.6027	33973.1	2.8738	1.52296	yes	yes	0.450083	-0.346708
	ZMYND11	211.208	87.6013	31.3178	52.4915	33331.5	34576.5	149.405	41.9047	33954	3.56534	1.83404	yes	yes	0.316605	-0.499483
	IQGAP1	303.483	160.378	71.3636	78.7372	34007.6	33898.5	231.93	75.0504	33953.1	3.09033	1.62776	yes	yes	0.46205	-0.335311
	SON	268.624	206.2	89.3329	87.2285	34710.1	33172.7	237.412	88.2807	33941.4	2.68928	1.42722	yes	yes	0.439378	-0.357162
	PTPA	108.68	61.9947	36.4519	50.1757	33742.2	34063.7	85.3372	43.3138	33903	1.97021	0.978349	yes	yes	0.123952
	CA12	311.685	225.068	106.275	98.0355	33518.6	34252.7	268.377	102.155	33885.6	2.62714	1.39349	yes	yes	0.490536	-0.309329
	TPBG	166.095	52.5608	22.0765	35.5089	33824.7	33887.7	109.328	28.7927	33856.2	3.79707	1.92489	yes	yes	0.237875	-0.623651
	XRCC6	268.624	200.809	94.4669	119.65	33164.8	34517.8	234.716	107.058	33841.3	2.19242	1.13252	yes	yes	0.377225	-0.423399
	NFE2L1	244.017	148.248	53.3944	82.5969	33707.4	33969.1	196.133	67.9956	33838.3	2.88449	1.52832	yes	yes	0.378675	-0.421734
	MYO6	192.753	71.4287	31.3178	47.8599	33806.9	33854	132.091	39.5889	33830.4	3.33656	1.73836	yes	yes	0.273428	-0.563157
	ARHGDIA	227.612	185.984	83.172	110.386	33710.8	33875.7	206.798	96.7792	33793.2	2.1368	1.09545	yes	yes	0.325565	-0.487362
	SEZ6L2	161.994	68.7333	30.291	29.3335	34153	33399.8	115.364	29.8122	33776.4	3.86968	1.95221	yes	yes	0.253288	-0.596386
	TSC22D3	200.955	76.8196	23.6167	37.0528	33501.6	33969.1	138.887	30.3348	33735.4	4.57849	2.19487	yes	yes	0.321777	-0.492445
	PPM1D	192.753	95.6875	38.5055	58.6669	33347.6	34099.5	144.22	48.5862	33723.6	2.96833	1.56965	yes	yes	0.283582	-0.547322
	NUPR1	151.742	51.213	16.9424	20.8422	32852.7	34552.6	101.477	18.8923	33702.6	5.37135	2.42529	yes	yes	0.24504	-0.610763
	TXNIP	205.056	48.5176	14.3754	20.8422	33398.7	33964.8	126.787	17.6088	33681.7	7.2002	2.84804	yes	yes	0.324146	-0.489259
	PDIA6	200.955	152.291	61.6089	77.9653	32910.5	34362.5	176.623	69.7871	33636.5	2.53089	1.33964	yes	yes	0.31762	-0.498092
	RHOA	412.163	295.149	124.758	159.79	32424.1	34637.3	353.656	142.274	33530.7	2.48574	1.31367	yes	yes	0.630413	-0.200375	yes
	CST3	129.185	61.9947	25.6704	40.1405	32984.5	34051.7	95.5901	32.9054	33518.1	2.90499	1.53853	yes	yes	0.187017	-0.728119
	TBC1D16	147.64	59.2993	39.5324	35.5089	33133.3	33759.5	103.47	37.5206	33446.4	2.75768	1.46345	yes	yes	0.197179	-0.70514
	RBM3	168.146	125.337	52.3675	62.5266	32954.7	33851.8	146.742	57.4471	33403.3	2.55438	1.35297	yes	yes	0.267323	-0.572964
	IGSF3	172.247	80.8627	46.7201	51.7195	33395.3	33384.6	126.555	49.2198	33389.9	2.57122	1.36245	yes	yes	0.231612	-0.635239
	RXRA	182.5	97.0352	37.4787	43.2283	33022.8	33750.8	139.768	40.3535	33386.8	3.46358	1.79226	yes	yes	0.297765	-0.526126
	FKBP4	295.281	204.852	95.4937	109.615	32877.3	33833.3	250.067	102.554	33355.3	2.43839	1.28593	yes	yes	0.442245	-0.354337
	CBX5	250.169	90.2967	56.9882	54.0353	33441.2	33194.5	170.233	55.5118	33317.8	3.0666	1.61664	yes	yes	0.344323	-0.463034
	BUB3	215.309	122.642	55.448	69.474	32512.5	33914.8	168.975	62.461	33213.7	2.70529	1.43579	yes	yes	0.320694	-0.493909
	LAMP1	168.146	87.6013	42.6128	43.2283	32803.4	33614.9	127.874	42.9205	33209.2	2.97931	1.57498	yes	yes	0.255812	-0.592078
	CTNNB1	231.713	190.027	62.6357	77.1933	33226.9	33182.5	210.87	69.9145	33204.7	3.01612	1.59269	yes	yes	0.424506	-0.372116
	STIP1	276.826	195.418	82.6586	118.878	32583.1	33356.4	236.122	100.768	32969.7	2.34322	1.22849	yes	yes	0.41054	-0.386645
	SMC1A	270.674	145.553	66.2295	71.0179	32815.3	33061.9	208.113	68.6237	32938.6	3.03268	1.60059	yes	yes	0.423484	-0.373163
	MTATP6P1	362.949	280.324	241.301	261.685	32364.5	33410.7	321.637	251.493	32887.6	1.27891	0.354912	yes	yes	0.213282
	WNK1	205.056	148.248	59.5552	65.6143	33572.2	32149.3	176.652	62.5848	32860.7	2.82261	1.49703	yes	yes	0.347124	-0.459515
	ARF1	272.725	157.682	83.6854	100.351	32330.5	33309.6	215.203	92.0184	32820.1	2.3387	1.22571	yes	yes	0.375335	-0.425581
	TBL1X	123.034	72.7764	37.9921	49.4037	32321.2	33284.7	97.9051	43.6979	32802.9	2.2405	1.16382	yes	yes	0.165251	-0.781856
	SRSF5	231.713	86.2535	53.3944	47.8599	32512.5	32996.7	158.983	50.6271	32754.6	3.14028	1.6509	yes	yes	0.330813	-0.480418
	TCEAL4	147.64	64.6902	28.7508	33.9651	31173.9	34213.6	106.165	31.3579	32693.8	3.3856	1.75941	yes	yes	0.228812	-0.64052
	USP10	229.663	128.033	60.0686	67.9301	32231.9	33060.8	178.848	63.9994	32646.3	2.79452	1.4826	yes	yes	0.351795	-0.45371
	MORF4L1	326.039	136.119	66.2295	78.7372	31666.3	33621.5	231.079	72.4834	32643.9	3.18803	1.67266	yes	yes	0.485836	-0.31351
	CDYL2	184.551	119.946	42.6128	58.6669	32126.4	33144.5	152.248	50.6399	32635.4	3.00649	1.58808	yes	yes	0.311344	-0.506759
	MCCC2	168.146	92.9921	31.3178	32.4212	32262.5	33006.5	130.569	31.8695	32634.5	4.09699	2.03456	yes	yes	0.302439	-0.519362
	CLDN4	129.185	66.0379	29.2642	52.4915	32163.8	32930.5	97.6116	40.8778	32547.1	2.38789	1.25573	yes	yes	0.174313	-0.758671
	TMSB10	295.281	230.459	122.191	142.036	31805.8	33262.9	262.87	132.113	32534.4	1.98973	0.992572	yes	yes	0.401903
	CRTAP	239.916	99.7307	51.8541	47.0879	31888.3	33081.5	169.823	49.471	32484.9	3.43278	1.77938	yes	yes	0.370487	-0.431227
	UBTF	192.753	130.728	46.2067	55.5792	32097.5	32373.1	161.74	50.8929	32235.3	3.17805	1.66814	yes	yes	0.34387	-0.463606
	TPD52L1	248.118	110.512	42.6128	62.5266	31651	32776.2	179.315	52.5697	32213.6	3.411	1.77019	yes	yes	0.393453	-0.405107
	WAC	198.904	117.251	72.9038	91.0881	31636.5	32679.5	158.078	81.996	32158	1.92787	0.947009	yes	yes	0.236587
	SHROOM3	170.197	111.86	32.3447	57.1231	32117	32131.9	141.028	44.7339	32124.5	3.15261	1.65655	yes	yes	0.299754	-0.523235
	CBX3	186.601	137.467	59.0418	91.8601	30980	33183.6	162.034	75.4509	32081.8	2.14754	1.10268	yes	yes	0.269882	-0.568827
	LAMC1	268.624	190.027	72.3904	88.7723	32733.6	31346.4	229.325	80.5814	32040	2.84589	1.50888	yes	yes	0.464245	-0.333253
	CSNK1D	215.309	105.122	60.0686	68.7021	32003.1	31999.3	160.215	64.3854	32001.2	2.48838	1.31521	yes	yes	0.299457	-0.523665
	TMED2	221.461	140.162	56.9882	71.0179	31270	32717.5	180.811	64.003	31993.8	2.82504	1.49827	yes	yes	0.365097	-0.437592
	SCRIB	143.539	98.3829	34.3983	45.5441	32115.3	31850.5	120.961	39.9712	31982.9	3.02621	1.59751	yes	yes	0.253229	-0.596487
	ATP2B1	225.562	145.553	55.9614	78.7372	31451.1	32364.4	185.557	67.3493	31907.8	2.75515	1.46213	yes	yes	0.370468	-0.43125
	TRAP1	198.904	134.771	71.877	75.6495	31429.9	32327.5	166.838	73.7632	31878.7	2.2618	1.17747	yes	yes	0.291965	-0.534669
	APRT	219.41	153.639	56.9882	77.1933	32074.5	31633.2	186.525	67.0908	31853.9	2.78018	1.47518	yes	yes	0.374943	-0.426035
	EIF2AK1	211.208	126.685	48.2603	48.6318	31150.9	32526.3	168.946	48.446	31838.6	3.48731	1.80211	yes	yes	0.378472	-0.421966
	ERP29	178.399	102.426	38.5055	51.7195	30976.6	32427.4	140.412	45.1125	31702	3.11249	1.63807	yes	yes	0.300612	-0.521994
	COL12A1	170.197	64.6902	20.0229	25.4738	33629.1	29475.4	117.443	22.7483	31552.3	5.16272	2.36813	yes	yes	0.300121	-0.522703
	CDKN1A	184.551	106.469	46.7201	60.2108	31430.7	31631	145.51	53.4654	31530.9	2.72157	1.44444	yes	yes	0.291918	-0.534738
	SMARCC2	155.843	82.2104	33.3715	40.9125	32174	30880.3	119.027	37.142	31527.1	3.20464	1.68016	yes	yes	0.259727	-0.585482
	SYNE2	223.511	60.647	36.4519	20.8422	33625.7	29420	142.079	28.6471	31522.9	4.95964	2.31024	yes	yes	0.359841	-0.44389
	TBX2	184.551	103.774	41.586	43.2283	31801.5	31148.6	144.162	42.4071	31475.1	3.39948	1.76531	yes	yes	0.323288	-0.490411
	BZW1	332.191	210.243	92.9267	101.123	30986	31948.3	271.217	97.025	31467.1	2.79533	1.48302	yes	yes	0.553568	-0.256829
	FAT1	241.966	129.38	72.3904	74.8775	33420.8	29481.9	185.673	73.634	31451.4	2.52157	1.33432	yes	yes	0.35623	-0.448269
	CCT4	264.522	183.289	78.0379	96.4917	31004.7	31889.6	223.906	87.2648	31447.1	2.56582	1.35942	yes	yes	0.43451	-0.362001
	ST13	223.511	95.6875	41.586	43.2283	30707.9	32144.9	159.599	42.4071	31426.4	3.7635	1.91208	yes	yes	0.37291	-0.428396
	PSMB4	207.107	126.685	61.0955	64.0705	31206.2	31627.8	166.896	62.583	31417	2.66679	1.41511	yes	yes	0.332027	-0.478827
	PFKL	168.146	101.078	34.9117	38.5967	31782	31023.7	134.612	36.7542	31402.8	3.6625	1.87283	yes	yes	0.311622	-0.506372
	ATIC	205.056	138.814	49.8005	60.9827	30764.8	32028.7	171.935	55.3916	31396.8	3.10399	1.63413	yes	yes	0.371196	-0.430396
	CPNE3	225.562	134.771	46.7201	57.1231	30599.9	32124.3	180.166	51.9216	31362.1	3.46997	1.79492	yes	yes	0.408917	-0.388365
	AP1B1	246.067	134.771	55.9614	60.2108	31713.1	30985.6	190.419	58.0861	31349.4	3.27822	1.71291	yes	yes	0.422124	-0.37456
	ARL6IP1	207.107	115.903	44.153	52.4915	30622.8	31963.5	161.505	48.3222	31293.1	3.34225	1.74082	yes	yes	0.361685	-0.441669
	MDH2	229.663	150.944	76.4977	72.5617	31241.9	31282.3	190.303	74.5297	31262.1	2.55339	1.35241	yes	yes	0.370332	-0.431409
	LARS1	207.107	87.6013	45.1798	37.8247	31015.7	31477.8	147.354	41.5023	31246.8	3.5505	1.82802	yes	yes	0.33876	-0.470107
	AZIN1	278.876	285.715	128.352	132.773	30540.3	31815.7	282.296	130.562	31178	2.16215	1.11247	yes	yes	0.486668	-0.312767
	HMGB2	182.5	87.6013	37.4787	40.1405	30217.2	32133	135.051	38.8096	31175.1	3.47982	1.79901	yes	yes	0.308711	-0.510447
	COPB2	227.612	125.337	55.9614	81.8249	30700.2	31626.7	176.475	68.8932	31163.4	2.56157	1.35703	yes	yes	0.345217	-0.461907
	PAWR	196.854	82.2104	32.8581	36.2809	30666.2	31639.7	139.532	34.5695	31152.9	4.03628	2.01303	yes	yes	0.336927	-0.472464
	PDIA3	182.5	137.467	53.3944	55.5792	30559.9	31704.9	159.983	54.4868	31132.4	2.93619	1.55394	yes	yes	0.338864	-0.469974
	UBE2D3	971.966	811.322	400.971	382.879	30518.2	31616.9	891.644	391.925	31067.6	2.27504	1.18589	yes	yes	1.60849	0.206419	yes
	C1orf43	223.511	126.685	47.2335	60.9827	30532.7	31600.6	175.098	54.1081	31066.6	3.23608	1.69425	yes	yes	0.389453	-0.409545
	CPSF1	161.994	84.9058	40.5592	54.8073	31810	30269.6	123.45	47.6832	31039.8	2.58896	1.37237	yes	yes	0.244096	-0.61244
	HNRNPR	350.646	252.022	141.7	132.001	30305.6	31751.6	301.334	136.85	31028.6	2.20192	1.13876	yes	yes	0.530103	-0.27564
	PCK2	125.084	67.3856	19.5095	23.158	30977.4	30910.7	96.2349	21.3337	30944.1	4.51093	2.17342	yes	yes	0.242053	-0.616089
	SH3BGRL	200.955	115.903	52.3675	64.8424	30149.1	31737.5	158.429	58.605	30943.3	2.70334	1.43474	yes	yes	0.322603	-0.491331
	RPN1	246.067	152.291	49.8005	71.7898	30777.6	31097.5	199.179	60.7952	30937.6	3.27624	1.71204	yes	yes	0.447302	-0.3494
	HP1BP3	180.449	80.8627	47.7469	54.0353	30817.6	30959.6	130.656	50.8911	30888.6	2.56737	1.36029	yes	yes	0.258235	-0.587986
	ECI1	157.893	80.8627	29.7776	33.1931	30618.6	30942.2	119.378	31.4854	30780.4	3.79154	1.92278	yes	yes	0.285548	-0.544322
	RBBP7	205.056	134.771	78.0379	79.5091	30236.7	31305.1	169.914	78.7735	30770.9	2.15699	1.10902	yes	yes	0.296189	-0.52843
	USP7	241.966	148.248	55.9614	80.2811	30386.4	31143.2	195.107	68.1212	30764.8	2.86412	1.51809	yes	yes	0.412764	-0.384298
	TNFRSF12A	219.41	192.723	64.1759	103.439	30906	30619.5	206.066	83.8075	30762.8	2.45881	1.29796	yes	yes	0.397425	-0.400745
	PSMD2	307.584	214.286	101.141	121.194	30363.4	31122.5	260.935	111.167	30743	2.34723	1.23096	yes	yes	0.487161	-0.312328
	TXNRD1	514.691	454.179	233.087	257.054	29908.4	31539.8	484.435	245.07	30724.1	1.97672	0.983107	yes	yes	0.779078
	CRABP2	149.691	94.3398	36.9653	55.5792	30417.9	30854.2	122.015	46.2723	30636	2.6369	1.39884	yes	yes	0.247236	-0.606889
	DDX54	221.461	132.076	52.3675	65.6143	30532.7	30695.5	176.768	58.9909	30614.1	2.99653	1.58329	yes	yes	0.384716	-0.41486
	FBP1	96.3764	47.1699	14.3754	24.7019	29851.5	31219.2	71.7731	19.5386	30535.3	3.6734	1.87711	yes	yes	0.171062	-0.766845
	PYGB	190.702	191.375	75.9843	71.0179	30329.4	30521.7	191.039	73.5011	30425.6	2.59913	1.37803	yes	yes	0.386312	-0.413062
	CTSD	137.388	75.4719	35.9385	30.1054	30354.1	30466.3	106.43	33.022	30410.2	3.223	1.6884	yes	yes	0.241392	-0.617277
	PAK2	192.753	102.426	43.1262	53.2634	29767.3	30899.8	147.589	48.1948	30333.5	3.06235	1.61464	yes	yes	0.327672	-0.48456
	LAPTM4A	241.966	126.685	48.7737	67.9301	29617.6	31018.2	184.326	58.3519	30317.9	3.15886	1.6594	yes	yes	0.415509	-0.38142
	KMT2A	203.006	66.0379	31.3178	32.4212	31757.3	28685.5	134.522	31.8695	30221.4	4.22102	2.07759	yes	yes	0.339667	-0.468947
	EPAS1	233.764	202.157	73.9306	77.9653	30257.1	30175.1	217.96	75.948	30216.1	2.86987	1.52098	yes	yes	0.469989	-0.327912
	DRAM1	166.095	64.6902	23.6167	22.3861	29441.5	30924.8	115.393	23.0014	30183.2	5.01677	2.32676	yes	yes	0.306102	-0.514133
	NCAPD2	215.309	113.208	54.4212	64.0705	30369.4	29810.1	164.258	59.2458	30089.7	2.77249	1.47118	yes	yes	0.348998	-0.457177
	MRPS34	141.489	64.6902	43.1262	54.8073	29937.4	30217.5	103.089	48.9667	30077.4	2.1053	1.07402	yes	yes	0.179945	-0.744861
	OGA	159.944	75.4719	35.9385	41.6844	30118.5	29928.5	117.708	38.8115	30023.5	3.03281	1.60066	yes	yes	0.262782	-0.580404
	DEK	241.966	82.2104	60.0686	55.5792	29270.6	30606.5	162.088	57.8239	29938.5	2.80314	1.48704	yes	yes	0.348262	-0.458094
	RNF213	233.764	134.771	63.1491	54.0353	31367.8	28508.4	184.268	58.5922	29938.1	3.14492	1.65302	yes	yes	0.419784	-0.376974
	IST1	178.399	97.0352	41.0726	45.5441	29589.5	29961.1	137.717	43.3083	29775.3	3.17992	1.66899	yes	yes	0.317071	-0.498844
	DHX9	280.927	225.068	87.7926	107.299	29741.8	29806.8	252.997	97.5457	29774.3	2.59363	1.37497	yes	yes	0.522101	-0.282246
	SCRN1	217.36	132.076	41.0726	42.4563	29391.4	30102.3	174.718	41.7645	29746.8	4.1834	2.06468	yes	yes	0.446949	-0.349742
	CPT1A	149.691	72.7764	41.586	38.5967	29730.7	29757.9	111.234	40.0913	29744.3	2.77451	1.47223	yes	yes	0.23918	-0.621275
	SLC9A3R2	184.551	113.208	47.2335	68.7021	29736.6	29696	148.879	57.9678	29716.3	2.56831	1.36082	yes	yes	0.305931	-0.514377
	OAZ1	215.309	126.685	63.6625	84.9127	29508.7	29912.2	170.997	74.2876	29710.5	2.30182	1.20278	yes	yes	0.325506	-0.487441
	MACROH2A1	225.562	148.248	60.0686	65.6143	29357.4	30062.1	186.905	62.8415	29709.7	2.97423	1.57252	yes	yes	0.417585	-0.379255
	NCAM2	161.994	64.6902	25.6704	23.9299	28960.2	30444.6	113.342	24.8001	29702.4	4.57023	2.19227	yes	yes	0.298098	-0.525641
	SURF4	256.32	144.205	60.5821	66.3863	29282.5	30075.2	200.263	63.4842	29678.8	3.15453	1.65742	yes	yes	0.460862	-0.336429
	CALM2	309.635	250.674	100.628	106.527	28927	30266.4	280.155	103.577	29596.7	2.70479	1.43552	yes	yes	0.596611	-0.224309
	PLCG1	180.449	78.1673	30.8044	44.7721	30302.2	28876.8	129.308	37.7883	29589.5	3.42192	1.7748	yes	yes	0.309299	-0.509621
	PPP1CA	260.421	136.119	51.8541	84.1407	29175.4	29974.1	198.27	67.9974	29574.7	2.91585	1.54391	yes	yes	0.440486	-0.356068
	GAA	104.579	41.7791	22.0765	22.3861	30043.7	29094.1	73.1788	22.2313	29568.9	3.29171	1.71884	yes	yes	0.172301	-0.763711
	CUX1	186.601	78.1673	26.1838	27.7896	29751.1	29187.5	132.384	26.9867	29469.3	4.90554	2.29441	yes	yes	0.357652	-0.44654
	TSC2	196.854	97.0352	42.0994	46.316	30405.9	28456.3	146.945	44.2077	29431.1	3.32396	1.7329	yes	yes	0.349076	-0.45708
	USP22	176.348	114.555	42.6128	39.3686	29334.4	29453.7	145.452	40.9907	29394	3.54841	1.82717	yes	yes	0.355382	-0.449304
	CCT6A	223.511	168.464	77.0111	108.843	28499.3	30220.8	195.988	92.9268	29360	2.10905	1.07659	yes	yes	0.351024	-0.454663
	TM9SF3	186.601	110.512	59.0418	61.7547	28567.3	30057.8	148.557	60.3982	29312.5	2.45962	1.29844	yes	yes	0.300754	-0.521789
	ANKRD52	207.107	132.076	71.877	74.8775	29828.5	28750.7	169.591	73.3773	29289.6	2.31122	1.20866	yes	yes	0.328492	-0.483476
	CAPNS1	182.5	161.725	62.1223	70.2459	29217.9	29312.4	172.113	66.1841	29265.2	2.60051	1.3788	yes	yes	0.361961	-0.441338
	HSBP1	225.562	111.86	62.6357	57.895	28388.7	30102.3	168.711	60.2653	29245.5	2.79947	1.48515	yes	yes	0.370811	-0.430847
	ACTN1	244.017	171.159	101.655	111.93	29085.2	29311.4	207.588	106.792	29198.3	1.94385	0.958914	yes	yes	0.345211
	HSPA4	272.725	196.766	73.4172	104.211	28612.4	29736.2	234.745	88.8141	29174.3	2.64311	1.40224	yes	yes	0.500205	-0.300852
	H2AX	168.146	102.426	43.6396	78.7372	29145.6	29178.8	135.286	61.1884	29162.2	2.21098	1.14468	yes	yes	0.254088	-0.595016
	PRMT6	125.084	78.1673	34.9117	53.2634	28657.4	29652.5	101.626	44.0875	29155	2.30509	1.20482	yes	yes	0.197353	-0.704756
	AP1G1	213.258	142.857	51.8541	54.0353	28727.2	29314.6	178.058	52.9447	29020.9	3.36309	1.74979	yes	yes	0.431114	-0.365408
	SLIT1	131.236	66.0379	21.5631	27.0177	29383.7	28645.3	98.6369	24.2904	29014.5	4.06074	2.02174	yes	yes	0.256239	-0.591355
	NCKAP1	198.904	103.774	49.2871	54.8073	28404.9	29609.1	151.339	52.0472	29007	2.90773	1.53989	yes	yes	0.342304	-0.465588
	KDM5C	223.511	117.251	38.5055	50.9476	29202.6	28770.3	170.381	44.7266	28986.4	3.80939	1.92956	yes	yes	0.433494	-0.363017
	LRP10	237.865	130.728	55.9614	76.4214	28952.5	29013.7	184.297	66.1914	28983.1	2.7843	1.47731	yes	yes	0.407497	-0.389876
	MTSS2	188.652	128.033	56.4748	57.1231	29137.9	28747.5	158.342	56.7989	28942.7	2.78777	1.47911	yes	yes	0.350842	-0.454888
	SNRNP70	205.056	126.685	74.9575	87.2285	29178.8	28702.9	165.871	81.093	28940.8	2.04544	1.03241	yes	yes	0.292934	-0.53323
	TSPAN13	141.489	84.9058	40.0458	47.8599	28408.3	29438.5	113.197	43.9528	28923.4	2.57543	1.36481	yes	yes	0.239407	-0.620864
	TPM3	280.927	212.938	90.8731	125.825	28192.2	29617.7	246.933	108.349	28905	2.27905	1.18843	yes	yes	0.479445	-0.319261
	CITED2	147.64	84.9058	23.6167	44.0002	28690.6	29115.8	116.273	33.8085	28903.2	3.43917	1.78206	yes	yes	0.285313	-0.544678
	PPIB	184.551	187.332	82.1452	106.527	28614.1	29170.1	185.941	94.336	28892.1	1.97105	0.978967	yes	yes	0.31706
	PSMD7	260.421	126.685	69.8234	74.8775	28165	29474.3	193.553	72.3505	28819.7	2.67522	1.41966	yes	yes	0.420555	-0.376177
	DKC1	231.713	122.642	54.4212	67.9301	28245.8	29244	177.178	61.1756	28744.9	2.89621	1.53417	yes	yes	0.403557	-0.394096
	DDX21	291.18	202.157	86.7658	88.0004	28256	29182.1	246.668	87.3831	28719	2.82284	1.49715	yes	yes	0.554632	-0.255995
	RBBP4	166.095	68.7333	41.0726	36.2809	27841.9	29508	117.414	38.6767	28674.9	3.03579	1.60207	yes	yes	0.274587	-0.56132
	PTGFRN	166.095	101.078	32.8581	41.6844	28892.2	28453	133.587	37.2712	28672.6	3.58418	1.84164	yes	yes	0.335916	-0.47377
	GOLGB1	170.197	87.6013	17.9693	43.2283	29331.8	27976.1	128.899	30.5988	28653.9	4.21255	2.0747	yes	yes	0.34306	-0.46463
	DNM2	217.36	113.208	58.5284	54.0353	28837.7	28455.2	165.284	56.2819	28646.5	2.93671	1.5542	yes	yes	0.380507	-0.419638
	TOMM20	157.893	118.599	32.8581	61.7547	27903.9	29340.7	138.246	47.3064	28622.3	2.92235	1.54713	yes	yes	0.317723	-0.497952
	ST14	139.438	82.2104	35.4251	46.316	28751	28441.1	110.824	40.8705	28596	2.71159	1.43914	yes	yes	0.244627	-0.611495
	NIBAN2	207.107	137.467	74.4441	71.7898	28704.2	28474.8	172.287	73.1169	28589.5	2.35632	1.23653	yes	yes	0.346875	-0.459827
	COPA	172.247	90.2967	47.2335	41.6844	28802	28354.2	131.272	44.4589	28578.1	2.95266	1.56201	yes	yes	0.303775	-0.517448
	LRP5	151.742	87.6013	27.2106	37.8247	28804.6	28231.4	119.671	32.5177	28518	3.6802	1.87978	yes	yes	0.30561	-0.514833
	CREBBP	159.944	74.1241	45.6932	40.1405	29166.9	27845.7	117.034	42.9169	28506.3	2.72699	1.44731	yes	yes	0.260003	-0.585022
	SRSF2	313.736	230.459	107.302	149.755	28038.3	28887.6	272.097	128.529	28463	2.11702	1.08203	yes	yes	0.504405	-0.29722
	S100A14	166.095	70.081	31.3178	37.8247	28040	28824.6	118.088	34.5713	28432.3	3.41579	1.77222	yes	yes	0.29374	-0.532038
	VDAC1	221.461	183.289	60.5821	77.9653	27866.5	28947.4	202.375	69.2737	28407	2.92138	1.54665	yes	yes	0.468551	-0.329243
	UBE2Z	143.539	102.426	42.6128	61.7547	27972.8	28839.8	122.983	52.1837	28406.3	2.35672	1.23678	yes	yes	0.249237	-0.603388
	ITPR3	192.753	109.165	39.019	55.5792	28985.7	27803.3	150.959	47.2991	28394.5	3.19158	1.67427	yes	yes	0.365069	-0.437625
	ARF3	207.107	101.078	40.0458	59.4389	28049.4	28680.1	154.093	49.7423	28364.7	3.09782	1.63125	yes	yes	0.367887	-0.434285
	AP3D1	209.157	101.078	43.1262	67.9301	28442.3	28234.6	155.118	55.5282	28338.5	2.7935	1.48207	yes	yes	0.351429	-0.454162
	TSPYL1	120.983	67.3856	27.2106	44.7721	28213.5	28344.4	94.1844	35.9914	28278.9	2.61686	1.38784	yes	yes	0.205782	-0.686592
	STT3B	205.056	118.599	45.6932	52.4915	27658.2	28892	161.827	49.0924	28275.1	3.29639	1.72089	yes	yes	0.398708	-0.399345
	MAF1	118.933	53.9085	26.1838	30.8773	27960.1	28559.5	86.4205	28.5306	28259.8	3.02905	1.59887	yes	yes	0.204849	-0.688566
	GHITM	203.006	169.812	62.6357	91.8601	27592.7	28901.8	186.409	77.2479	28247.2	2.41312	1.2709	yes	yes	0.386448	-0.412909
	MTHFD1	221.461	141.51	65.7161	84.9127	27838.5	28591	181.485	75.3144	28214.7	2.4097	1.26885	yes	yes	0.376296	-0.424471
	MAPKAPK2	180.449	114.555	46.7201	75.6495	27954.1	28359.6	147.502	61.1848	28156.9	2.41077	1.26949	yes	yes	0.30656	-0.513484
	ZNRF1	145.59	68.7333	31.3178	43.2283	28222.9	28066.2	107.162	37.2731	28144.5	2.87504	1.52358	yes	yes	0.24832	-0.604988
	USP8	213.258	102.426	35.9385	37.8247	27555.3	28628	157.842	36.8816	28091.6	4.2797	2.09751	yes	yes	0.430593	-0.365933
	CLSTN1	184.551	76.8196	34.3983	48.6318	28221.2	27857.6	130.685	41.515	28039.4	3.1479	1.65439	yes	yes	0.318017	-0.49755
	PCNX3	161.994	80.8627	42.6128	54.0353	28731.4	27336.1	121.429	48.3241	28033.8	2.5128	1.32929	yes	yes	0.260773	-0.583738
	CIZ1	190.702	132.076	36.4519	49.4037	27667.5	28347.6	161.389	42.9278	28007.6	3.75954	1.91056	yes	yes	0.422961	-0.3737
	FBL	217.36	157.682	74.9575	72.5617	26874.9	29054.9	187.521	73.7596	27964.9	2.54233	1.34615	yes	yes	0.4068	-0.390619
	CDC25B	223.511	97.0352	41.586	60.2108	27911.6	27963	160.273	50.8984	27937.3	3.14889	1.65484	yes	yes	0.391501	-0.407267
	RAB6A	172.247	95.6875	33.8849	47.8599	27401.3	28436.7	133.967	40.8724	27919	3.2777	1.71268	yes	yes	0.333446	-0.476974
	CORO1B	153.792	90.2967	39.5324	44.7721	28002.6	27766.4	122.044	42.1522	27884.5	2.89532	1.53372	yes	yes	0.286511	-0.542858
	S100A16	244.017	138.814	67.7698	83.3688	27715.1	28030.4	191.416	75.5693	27872.8	2.53298	1.34084	yes	yes	0.415625	-0.381298
	UGDH	205.056	165.769	69.8234	93.4039	27012.7	28716	185.412	81.6137	27864.3	2.27183	1.18385	yes	yes	0.372515	-0.428857
	XRN2	233.764	145.553	52.3675	66.3863	27335.8	28385.7	189.658	59.3769	27860.8	3.19415	1.67543	yes	yes	0.467617	-0.33011
	KIF5B	180.449	134.771	53.9078	72.5617	27136.8	28533.4	157.61	63.2347	27835.1	2.49246	1.31757	yes	yes	0.339052	-0.469734
	DAZAP1	198.904	119.946	40.0458	73.3337	27755.1	27901.1	159.425	56.6897	27828.1	2.81225	1.49172	yes	yes	0.36918	-0.432762
	PDCD4	114.831	64.6902	19.5095	13.8948	27338.4	28317.2	89.7608	16.7021	27827.8	5.37421	2.42605	yes	yes	0.262538	-0.580807
	TAF7	186.601	76.8196	35.9385	38.5967	27184.5	28412.8	131.71	37.2676	27798.6	3.53418	1.82138	yes	yes	0.339739	-0.468855
	USP34	287.079	190.027	83.172	115.018	27673.5	27898.9	238.553	99.095	27786.2	2.40732	1.26743	yes	yes	0.501897	-0.299386
	BAZ2A	194.803	95.6875	45.1798	50.9476	28264.5	27243.8	145.245	48.0637	27754.1	3.02194	1.59547	yes	yes	0.350152	-0.455743
	KCTD3	147.64	76.8196	33.8849	44.7721	27191.3	28281.4	112.23	39.3285	27736.3	2.85366	1.51281	yes	yes	0.262838	-0.580312
	SNHG5	102.528	40.4313	18.9961	28.5615	27099.4	28298.7	71.4797	23.7788	27699.1	3.00603	1.58786	yes	yes	0.172211	-0.763939
	UBN1	176.348	92.9921	37.4787	48.6318	27838.5	27507.8	134.67	43.0553	27673.1	3.12785	1.64517	yes	yes	0.331061	-0.480092
	SPDEF	155.843	64.6902	24.6435	49.4037	27499.1	27828.3	110.266	37.0236	27663.7	2.97827	1.57447	yes	yes	0.264761	-0.577146
	USP9X	209.157	88.949	55.9614	57.895	27922.7	27374.1	149.053	56.9282	27648.4	2.61827	1.38861	yes	yes	0.333202	-0.477293
	EP400	188.652	84.9058	42.6128	49.4037	28899.8	26377.8	136.779	46.0083	27638.8	2.97292	1.57188	yes	yes	0.328417	-0.483575
	ZFHX3	145.59	63.3424	36.9653	38.5967	28596.2	26671.2	104.466	37.781	27633.7	2.76505	1.4673	yes	yes	0.241318	-0.61741
	DHX40	155.843	88.949	29.7776	30.8773	27073.1	28136.9	122.396	30.3275	27605	4.03581	2.01286	yes	yes	0.333521	-0.476877
	GRB2	170.197	95.6875	43.6396	56.3511	27541.7	27647.9	132.942	49.9954	27594.8	2.65909	1.41093	yes	yes	0.300588	-0.522028
	RNF40	127.135	102.426	49.2871	58.6669	27704.9	27461.1	114.78	53.977	27583	2.12647	1.08846	yes	yes	0.220438	-0.656713
	UBR4	205.056	83.5581	41.586	57.895	29861.7	25294.6	144.307	49.7405	27578.1	2.9012	1.53665	yes	yes	0.342904	-0.464827
	CCNG1	139.438	55.2562	22.0765	31.6493	26780.5	28358.5	97.3472	26.8629	27569.5	3.62385	1.85752	yes	yes	0.25566	-0.592337
	SAP18	205.056	99.7307	43.1262	52.4915	26851.9	28114	152.393	47.8088	27483	3.18756	1.67245	yes	yes	0.380543	-0.419596
	TRRAP	168.146	103.774	39.5324	65.6143	28672.7	26240.9	135.96	52.5733	27456.8	2.5861	1.37078	yes	yes	0.303701	-0.517554
	WASHC5	205.056	132.076	39.5324	47.0879	26905.5	27824	168.566	43.3101	27364.7	3.89207	1.96054	yes	yes	0.457727	-0.339393
	PSMD4	190.702	126.685	53.3944	72.5617	26841.7	27882.6	158.694	62.978	27362.2	2.51982	1.33332	yes	yes	0.34981	-0.456168
	YWHAQ	309.635	241.24	95.4937	139.72	26647.8	28070.6	275.438	117.607	27359.2	2.34202	1.22775	yes	yes	0.576883	-0.238912
	TPX2	178.399	110.512	47.2335	63.2985	27110.5	27602.3	144.456	55.266	27356.4	2.61382	1.38616	yes	yes	0.326028	-0.486745
	LGALS3	174.298	72.7764	40.5592	48.6318	27207.4	27458.9	123.537	44.5955	27333.2	2.77017	1.46997	yes	yes	0.288813	-0.539384
	UBXN4	157.893	123.989	35.9385	53.2634	26779.7	27843.5	140.941	44.601	27311.6	3.16005	1.65995	yes	yes	0.352746	-0.452538
	SOX4	127.135	61.9947	15.9156	32.4212	27019.5	27568.6	94.5648	24.1684	27294.1	3.91274	1.96818	yes	yes	0.257918	-0.588518
	VAPB	188.652	66.0379	37.4787	43.2283	26948.9	27636	127.345	40.3535	27292.4	3.15573	1.65797	yes	yes	0.318738	-0.496567
	ARFGEF3	168.146	78.1673	22.5899	34.737	27757.7	26723.3	123.157	28.6635	27240.5	4.29664	2.10321	yes	yes	0.346885	-0.459815
	NBN	172.247	91.6444	35.9385	47.8599	26625.7	27808.7	131.946	41.8992	27217.2	3.14913	1.65495	yes	yes	0.330844	-0.480377
	GIPC1	133.286	83.5581	32.3447	45.5441	26930.2	27503.4	108.422	38.9444	27216.8	2.78403	1.47718	yes	yes	0.255276	-0.59299
	TBC1D9B	174.298	92.9921	42.6128	50.1757	27410.7	27022.1	133.645	46.3942	27216.4	2.88064	1.52639	yes	yes	0.320581	-0.494062
	LMNB2	196.854	125.337	63.1491	68.7021	26786.5	27549.1	161.096	65.9256	27167.8	2.4436	1.28901	yes	yes	0.350305	-0.455554
	AGO2	188.652	90.2967	35.4251	40.1405	27715.1	26573.4	139.474	37.7828	27144.3	3.69147	1.8842	yes	yes	0.374633	-0.426394
	ABCA3	149.691	80.8627	27.724	45.5441	27243.1	27010.2	115.277	36.634	27126.7	3.14671	1.65385	yes	yes	0.28991	-0.537737
	TPM1	192.753	126.685	51.8541	64.0705	26804.3	27440.4	159.719	57.9623	27122.4	2.75556	1.46235	yes	yes	0.375176	-0.425765
	TCF25	127.135	64.6902	31.8312	45.5441	27187	26960.2	95.9125	38.6877	27073.6	2.47915	1.30985	yes	yes	0.211368	-0.674962
	ACIN1	166.095	109.165	57.5016	53.2634	27329	26788.5	137.63	55.3825	27058.8	2.48508	1.31329	yes	yes	0.303959	-0.517185
	PDS5A	205.056	86.2535	39.5324	60.2108	26734.6	27323.1	145.655	49.8716	27028.8	2.9206	1.54626	yes	yes	0.354374	-0.450538
	SLC4A2	190.702	119.946	69.8234	74.8775	27356.3	26619	155.324	72.3505	26987.6	2.14683	1.10221	yes	yes	0.307451	-0.512224
	MTA1	133.286	82.2104	29.7776	33.1931	27113	26854.8	107.748	31.4854	26983.9	3.42217	1.77491	yes	yes	0.282624	-0.548791
	RAB10	194.803	153.639	69.31	75.6495	26094.2	27854.4	174.221	72.4797	26974.3	2.40372	1.26527	yes	yes	0.37718	-0.423452
	WDR1	221.461	132.076	58.5284	74.8775	26598.5	27323.1	176.768	66.703	26960.8	2.65008	1.40604	yes	yes	0.408242	-0.389083
	PARD6B	170.197	70.081	24.1301	39.3686	26937	26897.2	120.139	31.7494	26917.1	3.78397	1.9199	yes	yes	0.328377	-0.483628
	NRDC	205.056	109.165	45.6932	47.8599	26657.2	27089.5	157.11	46.7766	26873.3	3.35874	1.74792	yes	yes	0.41057	-0.386613
	SEPHS2	143.539	92.9921	41.586	40.9125	26666.5	27011.3	118.266	41.2492	26838.9	2.8671	1.51959	yes	yes	0.286958	-0.542181
	H2AZ2	137.388	67.3856	31.8312	46.316	26393.6	27250.3	102.387	39.0736	26821.9	2.62035	1.38976	yes	yes	0.236049	-0.626997
	ZMYM2	155.843	110.512	37.9921	53.2634	26709.9	26832	133.178	45.6278	26771	2.91878	1.54537	yes	yes	0.327033	-0.485409
	NECTIN2	139.438	106.469	42.6128	48.6318	26839.2	26687.5	122.954	45.6223	26763.3	2.69504	1.4303	yes	yes	0.288945	-0.539184
	EIF3D	166.095	95.6875	45.1798	46.316	26172.4	27345.9	130.892	45.7479	26759.2	2.86115	1.51659	yes	yes	0.318185	-0.497321
	FTSJ3	174.298	101.078	40.5592	57.895	26602.8	26898.3	137.688	49.2271	26750.5	2.797	1.48388	yes	yes	0.330689	-0.48058
	HADHA	211.208	110.512	49.8005	77.9653	26144.4	27349.2	160.86	63.8829	26746.8	2.51805	1.33231	yes	yes	0.362576	-0.440602
	UBP1	178.399	87.6013	37.9921	49.4037	26378.2	27087.3	133	43.6979	26732.8	3.04362	1.60579	yes	yes	0.334055	-0.476182
	BANF1	192.753	130.728	47.2335	64.0705	26208.2	27245.9	161.74	55.652	26727	2.90628	1.53918	yes	yes	0.396933	-0.401283
	SNHG19	118.933	60.647	18.9961	22.3861	25968.3	27438.2	89.7898	20.6911	26703.3	4.33954	2.11754	yes	yes	0.258765	-0.587095
	VHL	90.2247	57.9516	17.9693	23.9299	26567	26791.8	74.0882	20.9496	26679.4	3.5365	1.82232	yes	yes	0.199174	-0.700766
	SUN1	139.438	75.4719	32.3447	37.0528	26848.5	26344.2	107.455	34.6987	26596.3	3.0968	1.63078	yes	yes	0.273557	-0.562951
	CYC1	172.247	105.122	43.6396	47.0879	26611.3	26494.1	138.684	45.3638	26552.7	3.05716	1.61219	yes	yes	0.351454	-0.454131
	CLEC3A	114.831	43.1268	11.8084	8.49127	25959.8	26838.5	78.9791	10.1498	26399.2	7.78133	2.96002	yes	yes	0.260725	-0.583817
	UBAP2L	258.371	203.504	89.3329	117.334	26601.1	26196.4	230.938	103.333	26398.7	2.23488	1.1602	yes	yes	0.483373	-0.315718
	TGOLN2	192.753	95.6875	41.0726	51.7195	26299.2	26477.8	144.22	46.3961	26388.5	3.10846	1.6362	yes	yes	0.370708	-0.430968
	PUM2	379.354	245.284	127.838	140.492	25916.5	26827.6	312.319	134.165	26372	2.32787	1.21901	yes	yes	0.675539	-0.170349
	FAM168B	215.309	115.903	47.7469	54.0353	26033.8	26650.5	165.606	50.8911	26342.2	3.25413	1.70227	yes	yes	0.43548	-0.361032
	PRPF19	182.5	101.078	46.2067	79.5091	26053.4	26619	141.789	62.8579	26336.2	2.25571	1.17358	yes	yes	0.299706	-0.523304
	CTSA	215.309	88.949	37.9921	40.9125	26557.7	26054.1	152.129	39.4523	26305.9	3.85602	1.94711	yes	yes	0.428333	-0.368219
	SYNGR2	151.742	103.774	44.153	59.4389	26069.5	26528.9	127.758	51.7959	26299.2	2.46656	1.3025	yes	yes	0.288837	-0.539348
	MAP4	223.511	146.901	39.5324	65.6143	26509.2	26026.9	185.206	52.5733	26268.1	3.52281	1.81673	yes	yes	0.50492	-0.296778
	CAPZB	186.601	113.208	70.8502	66.3863	26089.1	26418	149.904	68.6182	26253.6	2.18462	1.12738	yes	yes	0.30962	-0.509171
	ATP8B2	143.539	37.7359	10.7816	24.7019	26160.5	26346.3	90.6376	17.7417	26253.4	5.10873	2.35296	yes	yes	0.277662	-0.556483
	PHLDA3	135.337	84.9058	25.6704	37.8247	25785.5	26701.6	110.121	31.7475	26243.5	3.46866	1.79438	yes	yes	0.298641	-0.524851
	HEATR6	225.562	105.122	42.6128	67.1582	26419.9	26067.1	165.342	54.8855	26243.5	3.01248	1.59095	yes	yes	0.420889	-0.375832
	SETD7	203.006	125.337	45.6932	65.6143	25885.8	26551.7	164.171	55.6538	26218.8	2.94987	1.56065	yes	yes	0.413893	-0.383112
	BCAS2	118.933	86.2535	25.6704	38.5967	25255.7	27157.9	102.593	32.1335	26206.8	3.19271	1.67478	yes	yes	0.26886	-0.570474
	MADD	159.944	74.1241	28.2374	37.8247	26596	25760.7	117.034	33.0311	26178.3	3.54315	1.82503	yes	yes	0.320887	-0.493648
	SP1	176.348	63.3424	36.9653	41.6844	26218.4	26048.6	119.845	39.3249	26133.5	3.04757	1.60766	yes	yes	0.308112	-0.511291
	EIF4EBP2	170.197	102.426	35.9385	51.7195	25673.2	26589.7	136.311	43.829	26131.5	3.11007	1.63695	yes	yes	0.353912	-0.451105
	ATRX	141.489	76.8196	33.8849	38.5967	26424.2	25785.7	109.154	36.2408	26104.9	3.01192	1.59068	yes	yes	0.279309	-0.553915
	TCEA1	217.36	99.7307	37.4787	46.316	25409.6	26779.8	158.545	41.8974	26094.7	3.78413	1.91996	yes	yes	0.447017	-0.349676
	WWC3	151.742	91.6444	31.8312	37.8247	26271.9	25917.2	121.693	34.828	26094.5	3.49411	1.80493	yes	yes	0.332886	-0.477705
	CSRP1	196.854	154.987	68.7966	78.7372	25720.8	26459.3	175.92	73.7669	26090.1	2.38481	1.25388	yes	yes	0.391541	-0.407222
	INPP4B	182.5	70.081	30.8044	38.5967	25770.2	26324.6	126.29	34.7006	26047.4	3.63944	1.86372	yes	yes	0.351628	-0.453916
	AP2B1	159.944	141.51	59.5552	64.0705	25764.2	26287.7	150.727	61.8129	26025.9	2.43844	1.28596	yes	yes	0.341636	-0.466437
	IVNS1ABP	153.792	113.208	49.2871	54.0353	25652.8	26395.2	133.5	51.6612	26024	2.58414	1.36969	yes	yes	0.314474	-0.502415
	ADD1	166.095	97.0352	58.5284	72.5617	25925	26109.5	131.565	65.5451	26017.2	2.00725	1.00522	yes	yes	0.253756	-0.595583
	ESRP1	137.388	59.2993	15.9156	22.3861	25648.6	26375.7	98.3435	19.1508	26012.1	5.1352	2.36042	yes	yes	0.304445	-0.516491
	SEC31A	172.247	92.9921	37.4787	40.9125	25987	25984.5	132.62	39.1956	25985.8	3.38353	1.75853	yes	yes	0.35952	-0.444277
	TRIM44	149.691	101.078	34.3983	43.2283	25585.6	26345.2	125.385	38.8133	25965.4	3.23046	1.69174	yes	yes	0.33341	-0.477021
	PIAS3	168.146	109.165	32.8581	56.3511	26199.6	25723.8	138.655	44.6046	25961.7	3.10854	1.63624	yes	yes	0.362267	-0.440971
	SDC4	133.286	60.647	23.1033	23.158	25389.2	26532.1	96.9668	23.1307	25960.6	4.19213	2.06768	yes	yes	0.284416	-0.546047
	BAZ1B	211.208	119.946	43.1262	59.4389	25934.3	25917.2	165.577	51.2825	25925.7	3.22872	1.69096	yes	yes	0.440854	-0.355706
	WWP2	114.831	68.7333	23.6167	30.1054	25576.3	26139.9	91.7824	26.8611	25858.1	3.41693	1.7727	yes	yes	0.251068	-0.600209
	BOD1	129.185	63.3424	29.2642	41.6844	25552.5	26129	96.2639	35.4743	25840.7	2.71362	1.44022	yes	yes	0.235247	-0.628476
	SLC44A2	170.197	76.8196	26.6972	43.2283	25653.7	26005.2	123.508	34.9627	25829.4	3.53256	1.82072	yes	yes	0.342808	-0.464949
	ZKSCAN1	139.438	48.5176	24.6435	25.4738	25800.8	25847.6	93.9779	25.0587	25824.2	3.75031	1.90701	yes	yes	0.266878	-0.573687
	ZMIZ1	157.893	67.3856	26.1838	36.2809	26423.3	25179.4	112.639	31.2323	25801.4	3.6065	1.8506	yes	yes	0.315515	-0.500981
	EIF2AK2	133.286	56.6039	22.5899	20.8422	25578	25847.6	94.9452	21.7161	25712.8	4.37212	2.12833	yes	yes	0.284796	-0.545465
	RHOT2	168.146	84.9058	39.5324	57.1231	26242.2	25165.3	126.526	48.3277	25703.7	2.61808	1.38851	yes	yes	0.304229	-0.516799
	SZRD1	192.753	128.033	65.7161	75.6495	25133.2	26264.8	160.393	70.6828	25699	2.26919	1.18218	yes	yes	0.349079	-0.457076
	SUPT16H	182.5	119.946	48.7737	56.3511	25309.2	26085.6	151.223	52.5624	25697.4	2.87702	1.52458	yes	yes	0.383933	-0.415745
	ERBB2	135.337	71.4287	23.6167	27.0177	25848.4	25532.5	103.383	25.3172	25690.5	4.0835	2.02981	yes	yes	0.30387	-0.517312
	KIF1C	399.859	334.232	71.877	71.7898	25560.1	25816.1	367.046	71.8334	25688.1	5.10968	2.35323	yes	yes	1.14922	0.0604026	yes
	GLYR1	145.59	79.515	37.9921	51.7195	25669.8	25670.5	112.552	44.8558	25670.2	2.5092	1.32723	yes	yes	0.263717	-0.578862
	LAMB2	135.337	60.647	23.1033	30.1054	26810.3	24476.5	97.992	26.6044	25643.4	3.68331	1.881	yes	yes	0.278386	-0.555352
	SMARCA5	188.652	84.9058	33.8849	40.9125	25233.5	26050.8	136.779	37.3987	25642.2	3.65732	1.87079	yes	yes	0.387565	-0.411655
	NET1	207.107	130.728	23.6167	27.7896	25421.5	25856.3	168.917	25.7032	25638.9	6.57185	2.7163	yes	yes	0.558582	-0.252913
	PSME1	155.843	83.5581	32.3447	37.0528	25243.8	25938.9	119.7	34.6987	25591.3	3.44971	1.78647	yes	yes	0.33215	-0.478665
	CHPF	108.68	90.2967	29.7776	46.316	25816.9	25359.8	99.4882	38.0468	25588.4	2.61489	1.38675	yes	yes	0.240115	-0.619581
	EPN1	168.146	94.3398	38.5055	57.895	25575.4	25532.5	131.243	48.2003	25554	2.72287	1.44513	yes	yes	0.32497	-0.488157
	RNF10	200.955	95.6875	49.2871	64.0705	25238.6	25868.3	148.321	56.6788	25553.5	2.61687	1.38784	yes	yes	0.358631	-0.445353
	KIAA1324	61.5168	37.7359	12.8352	14.6667	25769.3	25333.7	49.6264	13.751	25551.5	3.60894	1.85158	yes	yes	0.140404	-0.85262
	ADGRG6	239.916	129.38	63.1491	64.8424	25650.3	25416.3	184.648	63.9957	25533.3	2.88532	1.52873	yes	yes	0.47253	-0.325571
	RTN3	149.691	92.9921	41.0726	34.737	24902.7	26118.2	121.342	37.9048	25510.4	3.20122	1.67862	yes	yes	0.327069	-0.485361
	NADSYN1	110.73	61.9947	22.5899	30.1054	25787.2	25224	86.3625	26.3477	25505.6	3.27781	1.71273	yes	yes	0.235301	-0.628376
	NME4	196.854	125.337	44.153	65.6143	25635	25366.3	161.096	54.8837	25500.6	2.93522	1.55347	yes	yes	0.416507	-0.380378
	GTF3C1	159.944	123.989	40.5592	66.3863	26281.3	24709	141.967	53.4727	25495.1	2.65494	1.40868	yes	yes	0.347101	-0.459544
	MAPK6	196.854	95.6875	52.3675	81.8249	24772.6	26184.4	146.271	67.0962	25478.5	2.18001	1.12434	yes	yes	0.31075	-0.507589
	LASP1	227.612	208.895	84.1988	80.2811	24985.2	25947.6	218.254	82.2399	25466.4	2.65387	1.4081	yes	yes	0.534092	-0.272384
	HNRNPDL	268.624	196.766	97.5474	96.4917	25038.8	25865	232.695	97.0195	25451.9	2.39843	1.26209	yes	yes	0.533065	-0.27322
	BRK1	118.933	95.6875	33.8849	53.2634	24817.7	25917.2	107.31	43.5741	25367.4	2.4627	1.30024	yes	yes	0.251251	-0.599892
	FAU	166.095	99.7307	53.9078	54.8073	25639.2	24954.5	132.913	54.3575	25296.9	2.44516	1.28993	yes	yes	0.310535	-0.50789
	TADA3	164.045	79.515	29.7776	44.7721	25396.8	25140.3	121.78	37.2749	25268.6	3.26708	1.708	yes	yes	0.334428	-0.475698
	CHMP1A	125.084	98.3829	43.1262	62.5266	25328.8	25203.3	111.734	52.8264	25266.1	2.11511	1.08073	yes	yes	0.233147	-0.632369
	SIAH2	112.781	52.5608	18.9961	27.7896	25101.7	25428.2	82.6708	23.3928	25265	3.53402	1.82131	yes	yes	0.234625	-0.629626
	APMAP	145.59	101.078	40.5592	57.895	24992.9	25455.4	123.334	49.2271	25224.1	2.50541	1.32505	yes	yes	0.293794	-0.531957
	TLE5	155.843	92.9921	37.9921	44.7721	24780.3	25629.2	124.417	41.3821	25204.7	3.00655	1.58811	yes	yes	0.329443	-0.48222
	SH3BP5	112.781	83.5581	27.2106	44.0002	24901.9	25458.7	98.1695	35.6054	25180.3	2.75715	1.46318	yes	yes	0.248465	-0.604735
	PNN	346.545	243.936	114.49	125.825	24961.4	25318.5	295.24	120.157	25140	2.45711	1.29696	yes	yes	0.696433	-0.157121
	HM13	149.691	105.122	47.7469	54.8073	24985.2	25194.6	127.406	51.2771	25089.9	2.48466	1.31305	yes	yes	0.303425	-0.517948
	CTBP1	114.831	78.1673	31.8312	40.1405	25011.6	25119.7	96.4994	35.9859	25065.6	2.68159	1.42309	yes	yes	0.24142	-0.617227
	REPIN1	131.236	91.6444	30.291	38.5967	25094.1	24980.6	111.44	34.4438	25037.3	3.23542	1.69395	yes	yes	0.307526	-0.512118
	RAB5B	182.5	82.2104	21.0497	35.5089	24780.3	25243.5	132.355	28.2793	25011.9	4.68028	2.2266	yes	yes	0.416106	-0.380797
	PRSS23	223.511	169.812	65.2027	123.509	24771.8	25245.7	196.661	94.356	25008.7	2.08425	1.05953	yes	yes	0.409079	-0.388193
	MARCKSL1	194.803	101.078	49.2871	54.0353	25034.5	24968.7	147.941	51.6612	25001.6	2.86367	1.51787	yes	yes	0.385094	-0.414433
	NDUFB9	184.551	117.251	36.9653	71.7898	24753	25245.7	150.901	54.3776	24999.4	2.77506	1.47252	yes	yes	0.386102	-0.413298
	SLC25A29	129.185	72.7764	27.2106	37.0528	25507.4	24486.3	100.981	32.1317	24996.8	3.14272	1.65201	yes	yes	0.275432	-0.559986
	RARG	100.478	67.3856	27.2106	40.9125	24933.3	25039.3	83.9315	34.0615	24986.3	2.46412	1.30107	yes	yes	0.199589	-0.699862
	AC104793.1	131.236	26.9542	14.3754	13.8948	24238.5	25728.1	79.0951	14.1351	24983.3	5.59565	2.48431	yes	yes	0.260013	-0.585004
	CELF1	393.708	230.459	136.053	134.316	25364.5	24571	312.083	135.185	24967.8	2.30857	1.207	yes	yes	0.708508	-0.149655
	ANXA5	182.5	102.426	42.6128	53.2634	24355	25552.1	142.463	47.9381	24953.6	2.97181	1.57134	yes	yes	0.378803	-0.421586
	THOC2	176.348	78.1673	33.8849	39.3686	24919.7	24930.6	127.258	36.6267	24925.2	3.47445	1.79678	yes	yes	0.363612	-0.439361
	TAOK2	147.64	83.5581	37.9921	53.2634	25086.4	24730.7	115.599	45.6278	24908.6	2.53353	1.34115	yes	yes	0.280913	-0.551427
	TMEM132A	133.286	82.2104	28.2374	48.6318	25062.6	24717.7	107.748	38.4346	24890.1	2.80342	1.48719	yes	yes	0.278479	-0.555207
	MTPN	217.36	125.337	51.8541	57.895	24375.4	25401.1	171.348	54.8746	24888.3	3.12255	1.64272	yes	yes	0.467987	-0.329766
	ILF2	164.045	163.073	65.2027	83.3688	24413.7	25315.2	163.559	74.2858	24864.5	2.20175	1.13865	yes	yes	0.359039	-0.444858
	KDM5B	131.236	80.8627	24.6435	32.4212	25283.7	24435.2	106.049	28.5324	24859.5	3.71681	1.89406	yes	yes	0.311821	-0.506095
	SLC25A36	114.831	45.8222	20.5363	29.3335	24372	25320.7	80.3268	24.9349	24846.4	3.22146	1.68772	yes	yes	0.222938	-0.651816
	CREBZF	123.034	110.512	31.8312	39.3686	24986.1	24702.5	116.773	35.5999	24844.3	3.28015	1.71376	yes	yes	0.326728	-0.485814
	MYO5A	184.551	83.5581	33.8849	44.0002	24955.4	24672	134.054	38.9425	24813.7	3.44236	1.7834	yes	yes	0.383303	-0.416458
	MTA2	237.865	119.946	47.2335	68.7021	24695.2	24894.8	178.906	57.9678	24795	3.0863	1.62588	yes	yes	0.487752	-0.311801
	SSRP1	207.107	163.073	69.31	67.1582	24235.1	25302.2	185.09	68.2341	24768.7	2.71257	1.43966	yes	yes	0.471789	-0.326252
	HMGB3	172.247	92.9921	45.1798	46.316	24013.2	25477.1	132.62	45.7479	24745.1	2.89892	1.53552	yes	yes	0.351066	-0.454612
	RNF187	114.831	63.3424	26.6972	32.4212	24891.7	24511.2	89.0869	29.5592	24701.5	3.01385	1.59161	yes	yes	0.240989	-0.618003
	PICALM	190.702	107.817	41.0726	54.8073	24264.9	25134.9	149.26	47.9399	24699.9	3.11347	1.63852	yes	yes	0.410203	-0.387001
	ROCK1	155.843	87.6013	39.019	57.1231	24400.1	24979.5	121.722	48.071	24689.8	2.53213	1.34035	yes	yes	0.298305	-0.525339
	INHBB	161.994	88.949	45.6932	52.4915	24674.8	24699.2	125.472	49.0924	24687	2.55583	1.35379	yes	yes	0.309391	-0.509493
	CLIC1	227.612	128.033	59.0418	64.8424	24355.9	24977.3	177.822	61.9421	24666.6	2.87078	1.52145	yes	yes	0.469786	-0.3281
	ERGIC3	170.197	86.2535	37.4787	53.2634	24572.7	24734	128.225	45.3711	24653.4	2.82614	1.49883	yes	yes	0.336076	-0.473563
	PTPRU	106.629	55.2562	20.5363	20.0703	24659.5	24611.2	80.9427	20.3033	24635.3	3.98668	1.99519	yes	yes	0.246148	-0.608804
	PRDX5	100.478	55.2562	34.3983	38.5967	24305.7	24961	77.8668	36.4975	24633.4	2.13349	1.09321	yes	yes	0.16794	-0.774845
	PRR11	96.3764	48.5176	17.9693	20.8422	24262.3	24937.1	72.447	19.4057	24599.7	3.73328	1.90044	yes	yes	0.215617	-0.666317
	SQLE	223.511	145.553	79.0647	98.0355	24006.4	25191.4	184.532	88.5501	24598.9	2.08393	1.05931	yes	yes	0.390188	-0.408726
	VPS35	194.803	87.6013	38.5055	39.3686	24232.6	24948	141.202	38.9371	24590.3	3.62642	1.85855	yes	yes	0.415876	-0.381036
	PSMC3	205.056	152.291	57.5016	79.5091	24111	25054.5	178.674	68.5054	24582.7	2.60817	1.38304	yes	yes	0.448154	-0.348573
	PDAP1	176.348	138.814	41.586	60.9827	23840.5	25309.8	157.581	51.2844	24575.2	3.0727	1.61951	yes	yes	0.432538	-0.363976
	MDN1	182.5	74.1241	32.8581	31.6493	26068.7	23039	128.312	32.2537	24553.9	3.97822	1.99212	yes	yes	0.391215	-0.407585
	BRWD1	131.236	56.6039	17.9693	27.7896	24433.3	24672	93.9199	22.8794	24552.7	4.10499	2.03738	yes	yes	0.289339	-0.538593
	SEPHS1	125.084	90.2967	34.3983	22.3861	23937.5	25130.5	107.69	28.3922	24534	3.79296	1.92333	yes	yes	0.323218	-0.490505
	NSD1	182.5	87.6013	31.3178	27.7896	24712.2	24321.1	135.051	29.5537	24516.7	4.56967	2.19209	yes	yes	0.430307	-0.366222
	LUC7L3	196.854	91.6444	45.6932	57.895	24204.5	24801.3	144.249	51.7941	24502.9	2.78505	1.4777	yes	yes	0.377322	-0.423287
	SMG7	176.348	78.1673	39.5324	52.4915	24284.4	24615.5	127.258	46.0119	24450	2.76576	1.46767	yes	yes	0.332294	-0.478477
	NAA50	178.399	91.6444	57.5016	60.9827	23988.5	24905.6	135.022	59.2422	24447.1	2.27915	1.18849	yes	yes	0.309974	-0.508675
	COPG1	157.893	97.0352	32.3447	48.6318	24318.5	24568.8	127.464	40.4882	24443.6	3.14818	1.65452	yes	yes	0.355823	-0.448766
	NDUFV1	170.197	92.9921	33.3715	46.316	24492	24290.7	131.594	39.8437	24391.3	3.30276	1.72367	yes	yes	0.376161	-0.424626
	PLXNA3	118.933	66.0379	20.5363	30.8773	25848.4	22926	92.4852	25.7068	24387.2	3.59769	1.84707	yes	yes	0.273825	-0.562526
	NACC1	180.449	113.208	35.9385	75.6495	24300.6	24372.2	146.829	55.794	24336.4	2.63162	1.39595	yes	yes	0.374068	-0.42705
	KDM2A	184.551	91.6444	41.0726	54.8073	24253	24411.3	138.097	47.9399	24332.1	2.88064	1.52639	yes	yes	0.370529	-0.431178
	ECE1	141.489	91.6444	32.3447	35.5089	24477.5	24164.6	116.567	33.9268	24321.1	3.43583	1.78066	yes	yes	0.339787	-0.468794
	SPEN	153.792	90.2967	37.4787	41.6844	24834.7	23697.5	122.044	39.5816	24266.1	3.08336	1.62451	yes	yes	0.339828	-0.468741
	MLXIP	106.629	74.1241	32.3447	40.1405	24607.6	23875.6	90.3767	36.2426	24241.6	2.49366	1.31826	yes	yes	0.22331	-0.651091
	IGF1R	153.792	70.081	32.8581	33.1931	24786.2	23695.3	111.937	33.0256	24240.7	3.38939	1.76102	yes	yes	0.32553	-0.487409
	TRIR	172.247	91.6444	39.019	54.8073	23664.5	24800.2	131.946	46.9131	24232.4	2.81256	1.49188	yes	yes	0.350905	-0.45481
	CHD6	139.438	55.2562	20.0229	28.5615	24778.6	23672.5	97.3472	24.2922	24225.5	4.00734	2.00265	yes	yes	0.301562	-0.520623
	SORT1	125.084	79.515	31.3178	44.0002	24206.2	24207	102.3	37.659	24206.6	2.71647	1.44173	yes	yes	0.267037	-0.573429
	AR	125.084	64.6902	28.7508	18.5264	24894.2	23478	94.8872	23.6386	24186.1	4.01408	2.00507	yes	yes	0.294585	-0.53079
	GOT2	166.095	126.685	52.3675	65.6143	23676.4	24650.3	146.39	58.9909	24163.3	2.48157	1.31125	yes	yes	0.361702	-0.441649
	PSMA7	104.579	64.6902	39.5324	56.3511	24103.3	24200.5	84.6344	47.9417	24151.9	1.76536	0.819962	yes	yes	0.151924
	CDKN1B	90.2247	52.5608	15.4022	20.8422	23984.2	24184.2	71.3927	18.1222	24084.2	3.93952	1.97802	yes	yes	0.221184	-0.655246
	MAP2K2	112.781	66.0379	25.157	37.8247	24088.8	24064.7	89.4094	31.4908	24076.8	2.83922	1.50549	yes	yes	0.240558	-0.618781
	JAK1	211.208	133.423	63.1491	64.0705	23677.2	24453.7	172.316	63.6098	24065.4	2.70895	1.43773	yes	yes	0.451709	-0.345141
	TASOR2	164.045	72.7764	33.8849	41.6844	24084.6	24021.2	118.411	37.7846	24052.9	3.13383	1.64793	yes	yes	0.335203	-0.474692
	STARD7	170.197	123.989	58.5284	57.895	23502	24587.3	147.093	58.2117	24044.7	2.52686	1.33735	yes	yes	0.369651	-0.432208
	SYT12	211.208	103.774	48.7737	84.9127	23984.2	24073.4	157.491	66.8432	24028.8	2.35612	1.23642	yes	yes	0.377246	-0.423376
	PFN2	170.197	115.903	60.0686	71.0179	23735.9	24317.8	143.05	65.5433	24026.9	2.18253	1.126	yes	yes	0.322583	-0.491358
	ASAP1	172.247	99.7307	34.3983	44.7721	24024.2	24023.4	135.989	39.5852	24023.8	3.43535	1.78046	yes	yes	0.401284	-0.396548
	TANC2	180.449	79.515	42.0994	33.9651	24623.8	23411.7	129.982	38.0322	24017.7	3.41769	1.77302	yes	yes	0.382842	-0.416981
	UBFD1	168.146	84.9058	37.9921	51.7195	23971.5	24052.7	126.526	44.8558	24012.1	2.82072	1.49607	yes	yes	0.34012	-0.468367
	STUB1	174.298	114.555	40.5592	64.0705	23875.4	24051.7	144.427	52.3148	23963.5	2.76072	1.46504	yes	yes	0.384383	-0.415235
	NDST1	186.601	66.0379	38.5055	37.0528	23874.5	24031	126.319	37.7792	23952.8	3.34363	1.74141	yes	yes	0.369645	-0.432215
	CDH3	112.781	64.6902	16.9424	30.1054	24012.3	23858.3	88.7355	23.5239	23935.3	3.77214	1.91538	yes	yes	0.27245	-0.564714
	NBEAL2	127.135	82.2104	32.3447	36.2809	25153.6	22701.1	104.673	34.3128	23927.4	3.05054	1.60907	yes	yes	0.294056	-0.53157
	IRF2BPL	108.68	52.5608	18.4827	31.6493	23888.1	23883.2	80.6203	25.066	23885.7	3.21632	1.68541	yes	yes	0.232584	-0.63342
	CDC37	176.348	92.9921	42.0994	60.2108	23644.9	24121.2	134.67	51.1551	23883.1	2.63259	1.39648	yes	yes	0.349684	-0.456325
	ACADVL	184.551	114.555	50.3139	71.7898	24111.8	23650.7	149.553	61.0519	23881.3	2.44961	1.29255	yes	yes	0.370588	-0.431109
	TM9SF2	151.742	94.3398	29.7776	43.2283	23704.4	24052.7	123.041	36.5029	23878.6	3.37071	1.75305	yes	yes	0.362407	-0.440803
	ATP9A	147.64	55.2562	19.5095	27.0177	23959.6	23796.3	101.448	23.2636	23878	4.36082	2.1246	yes	yes	0.327435	-0.484875
	CIRBP	168.146	71.4287	32.3447	20.0703	23468	24275.5	119.787	26.2075	23871.7	4.57074	2.19243	yes	yes	0.392011	-0.406702
	AC005332.6	147.64	57.9516	24.1301	30.1054	23411	24322.2	102.796	27.1178	23866.6	3.79073	1.92247	yes	yes	0.317088	-0.49882
	QSOX1	186.601	103.774	38.5055	48.6318	24190	23522.5	145.187	43.5687	23856.3	3.33238	1.73655	yes	yes	0.425962	-0.370629
	ACTR3	225.562	141.51	62.1223	80.2811	22962.9	24727.5	183.536	71.2017	23845.2	2.57769	1.36608	yes	yes	0.471098	-0.326889
	GNA13	164.045	98.3829	34.3983	47.8599	23429.8	24224.4	131.214	41.1291	23827.1	3.1903	1.67369	yes	yes	0.378078	-0.422419
	DDX23	178.399	114.555	39.019	64.8424	23634.7	23995.2	146.477	51.9307	23814.9	2.82063	1.49602	yes	yes	0.397005	-0.401204
	PHB	217.36	171.159	91.8999	98.8075	23470.6	24151.6	194.259	95.3537	23811.1	2.03725	1.02662	yes	yes	0.415377	-0.381558
	CTCF	172.247	95.6875	38.5055	48.6318	23440.8	24151.6	133.967	43.5687	23796.2	3.07486	1.62052	yes	yes	0.379887	-0.420346
	AKT2	192.753	88.949	44.6664	52.4915	23760.6	23788.7	140.851	48.5789	23774.6	2.89942	1.53577	yes	yes	0.388111	-0.411045
	PKN1	123.034	57.9516	27.2106	29.3335	23947.7	23572.5	90.4926	28.272	23760.1	3.20078	1.67843	yes	yes	0.26187	-0.581914
	GIGYF1	125.084	55.2562	17.4558	23.9299	24537	22876.1	90.1702	20.6929	23706.6	4.35755	2.12352	yes	yes	0.293072	-0.533025
	KDELR1	178.399	94.3398	42.6128	51.7195	23498.6	23906.1	136.369	47.1662	23702.4	2.89125	1.53169	yes	yes	0.376347	-0.424411
	IGF2R	139.438	91.6444	31.3178	39.3686	24913.8	22484.9	115.541	35.3432	23699.4	3.26912	1.7089	yes	yes	0.338398	-0.470573
	PRMT1	231.713	144.205	82.1452	82.5969	23417.8	23959.3	187.959	82.371	23688.6	2.28186	1.19021	yes	yes	0.445735	-0.350923
	G3BP1	168.146	92.9921	33.3715	49.4037	23441.7	23907.2	130.569	41.3876	23674.4	3.15479	1.65754	yes	yes	0.3767	-0.424004
	HNRNPH2	120.983	63.3424	22.5899	30.1054	23110.8	24200.5	92.1628	26.3477	23655.7	3.49795	1.80651	yes	yes	0.278221	-0.55561
	SMG5	164.045	109.165	48.7737	47.0879	23630.5	23673.6	136.605	47.9308	23652	2.85004	1.51098	yes	yes	0.374911	-0.426072
	CMTM4	125.084	79.515	31.3178	38.5967	23389.8	23794.2	102.3	34.9573	23592	2.92642	1.54914	yes	yes	0.285446	-0.544476
	METRN	125.084	123.989	39.5324	50.1757	23541.2	23631.2	124.537	44.854	23586.2	2.77649	1.47326	yes	yes	0.337837	-0.471293
	STT3A	178.399	91.6444	43.6396	43.2283	23355.8	23813.7	135.022	43.4339	23584.7	3.10867	1.6363	yes	yes	0.388335	-0.410794
	EIF3G	116.882	76.8196	32.8581	36.2809	23296.2	23872.4	96.8508	34.5695	23584.3	2.80163	1.48627	yes	yes	0.264079	-0.578265
	THRAP3	123.034	76.8196	39.5324	55.5792	23652.6	23513.8	99.9266	47.5558	23583.2	2.10125	1.07125	yes	yes	0.222068	-0.653513
	UPF1	147.64	76.8196	52.3675	54.0353	24184.9	22884.8	112.23	53.2014	23534.9	2.10953	1.07692	yes	yes	0.250813	-0.600649
	EFCAB14	129.185	79.515	31.8312	32.4212	23276.7	23781.1	104.35	32.1262	23528.9	3.24813	1.69961	yes	yes	0.306959	-0.51292
	KDELR2	157.893	90.2967	39.5324	47.0879	23197.6	23856.1	124.095	43.3101	23526.8	2.86526	1.51867	yes	yes	0.343373	-0.464234
	PI4KA	170.197	95.6875	28.2374	44.7721	24148.4	22890.2	132.942	36.5048	23519.3	3.64177	1.86464	yes	yes	0.410035	-0.387179
	CCNL2	159.944	60.647	20.0229	37.0528	24011.5	22985.8	110.295	28.5378	23498.6	3.86488	1.95042	yes	yes	0.347925	-0.458515
	FBRS	114.831	75.4719	30.291	37.8247	23656	23330.2	95.1516	34.0579	23493.1	2.79382	1.48224	yes	yes	0.26005	-0.584943
	BCLAF1	188.652	123.989	63.6625	71.0179	22787.7	24188.6	156.321	67.3402	23488.1	2.32136	1.21497	yes	yes	0.378832	-0.421554
	GLO1	94.3258	79.515	36.4519	45.5441	22780.9	24162.5	86.9204	40.998	23471.7	2.12011	1.08414	yes	yes	0.19565	-0.708519
	SLC39A6	131.236	57.9516	23.1033	24.7019	22990.9	23935.4	94.5938	23.9026	23463.2	3.95747	1.98458	yes	yes	0.301286	-0.521021
	MGAT4B	133.286	133.423	41.586	62.5266	23415.3	23458.4	133.355	52.0563	23436.9	2.56175	1.35713	yes	yes	0.346884	-0.459816
	DVL3	129.185	63.3424	32.8581	30.8773	23639.8	23011.9	96.2639	31.8677	23325.8	3.02074	1.5949	yes	yes	0.276072	-0.558977
	ECPAS	174.298	87.6013	41.586	48.6318	23278.4	23348.7	130.949	45.1089	23313.5	2.90296	1.53753	yes	yes	0.368201	-0.433915
	DCTN1	192.753	90.2967	35.9385	43.2283	23379.6	23181.4	141.525	39.5834	23280.5	3.57536	1.83809	yes	yes	0.437883	-0.358641
	TRMT112	174.298	94.3398	41.586	67.9301	22712	23835.4	134.319	54.7581	23273.7	2.45295	1.29452	yes	yes	0.341848	-0.466167
	OGDH	172.247	92.9921	47.7469	44.0002	23329.4	23216.1	132.62	45.8735	23272.8	2.89098	1.53156	yes	yes	0.372736	-0.428598
	IER5	100.478	52.5608	23.1033	22.3861	23401.7	23106.4	76.5191	22.7447	23254	3.36426	1.75029	yes	yes	0.231248	-0.635923
	YWHAE	221.461	187.332	69.31	82.5969	22500.2	23999.5	204.396	75.9534	23249.9	2.69107	1.42818	yes	yes	0.552446	-0.25771
	SYAP1	147.64	98.3829	40.5592	50.9476	22841.2	23635.5	123.012	45.7534	23238.4	2.68858	1.42685	yes	yes	0.33246	-0.478261
	EIF1AX	184.551	132.076	46.7201	69.474	22576.8	23861.5	158.313	58.097	23219.1	2.72498	1.44624	yes	yes	0.43161	-0.364909
	PPM1G	276.826	173.855	64.1759	81.053	22792.8	23611.6	225.34	72.6145	23202.2	3.10324	1.63378	yes	yes	0.658239	-0.181617
	HTATSF1	137.388	90.2967	40.5592	42.4563	22522.3	23839.8	113.842	41.5078	23181.1	2.74267	1.45558	yes	yes	0.312041	-0.505788
	BAMBI	120.983	66.0379	21.0497	16.9825	23046.2	23271.6	93.5105	19.0161	23158.9	4.91743	2.29791	yes	yes	0.321667	-0.492594
	DHX38	200.955	94.3398	34.9117	56.3511	23227.3	23043.4	147.647	45.6314	23135.4	3.23565	1.69406	yes	yes	0.440953	-0.355608
	PDPR	112.781	57.9516	24.1301	31.6493	23813.3	22423	85.3662	27.8897	23118.2	3.06085	1.61393	yes	yes	0.248621	-0.604463
	GABPB1-AS1	116.882	37.7359	16.9424	20.0703	23318.3	22828.3	77.309	18.5064	23073.3	4.17743	2.06262	yes	yes	0.254851	-0.593713
	PA2G4	203.006	128.033	65.2027	66.3863	22721.3	23405.2	165.519	65.7945	23063.3	2.5157	1.33096	yes	yes	0.432396	-0.364118
	ADGRG1	147.64	75.4719	28.7508	39.3686	23314.9	22797.8	111.556	34.0597	23056.4	3.27531	1.71163	yes	yes	0.336117	-0.47351
	CAMK2N1	120.983	71.4287	27.2106	23.9299	22726.4	23332.4	96.2059	25.5703	23029.4	3.76241	1.91166	yes	yes	0.306719	-0.513259
	PYCR1	112.781	53.9085	25.157	25.4738	23006.2	22984.7	83.3447	25.3154	22995.5	3.29225	1.71908	yes	yes	0.252351	-0.597995
	PPP4C	149.691	95.6875	35.9385	37.8247	22555.5	23385.6	122.689	36.8816	22970.6	3.32657	1.73404	yes	yes	0.373555	-0.427646
	SEL1L	143.539	56.6039	28.2374	37.0528	22934.8	22931.5	100.072	32.6451	22933.1	3.06544	1.61609	yes	yes	0.294013	-0.531633
	USP5	229.663	145.553	64.1759	77.1933	22891.4	22946.7	187.608	70.6846	22919.1	2.65415	1.40825	yes	yes	0.510157	-0.292296
	XPC	106.629	35.0405	24.6435	24.7019	22771.5	23066.2	70.8349	24.6727	22918.9	2.87098	1.52154	yes	yes	0.201416	-0.695907
	ANAPC5	176.348	115.903	51.8541	63.2985	22968.8	22827.2	146.126	57.5763	22898	2.53795	1.34366	yes	yes	0.386713	-0.412612
	PTTG1IP	120.983	66.0379	29.7776	47.0879	22494.3	23280.2	93.5105	38.4328	22887.3	2.43309	1.28279	yes	yes	0.240648	-0.618618
	CDC42SE1	161.994	76.8196	30.8044	48.6318	22854	22881.5	119.407	39.7181	22867.8	3.00636	1.58802	yes	yes	0.348477	-0.457826
	EIF3F	127.135	53.9085	28.7508	29.3335	22370.1	23365	90.5216	29.0421	22867.5	3.11691	1.64012	yes	yes	0.26885	-0.570489
	NOLC1	174.298	123.989	84.1988	89.5443	22609.1	23057.5	149.144	86.8715	22833.3	1.71683	0.779747	yes	yes	0.272725
	ATP6V0D1	147.64	102.426	41.586	55.5792	22459.4	23153.1	125.033	48.5826	22806.3	2.57362	1.3638	yes	yes	0.335218	-0.474673
	DNMT1	188.652	91.6444	50.8273	67.1582	23241	22305.7	140.148	58.9928	22773.3	2.37568	1.24834	yes	yes	0.356361	-0.448109
	CAPN15	174.298	80.8627	41.0726	53.2634	23325.1	22217.7	127.58	47.168	22771.4	2.70481	1.43552	yes	yes	0.353128	-0.452068
	CTBP2	143.539	87.6013	35.9385	50.1757	22506.2	22980.4	115.57	43.0571	22743.3	2.68412	1.42445	yes	yes	0.318834	-0.496436
	TNFRSF1A	180.449	105.122	50.3139	66.3863	22643.1	22724	142.785	58.3501	22683.5	2.44705	1.29104	yes	yes	0.372232	-0.429186
	DENR	131.236	64.6902	31.3178	37.0528	22183	23160.7	97.963	34.1853	22671.9	2.86565	1.51886	yes	yes	0.281308	-0.550818
	THAP12	186.601	59.2993	37.4787	44.7721	22268.9	23069.5	122.95	41.1254	22669.2	2.98964	1.57997	yes	yes	0.360952	-0.442551
	ATP6AP2	118.933	67.3856	29.2642	37.0528	22013.8	23308.5	93.1591	33.1585	22661.1	2.80951	1.49032	yes	yes	0.264773	-0.577126
	YWHAG	227.612	146.901	80.0915	73.3337	22368.4	22931.5	187.256	76.7126	22649.9	2.44101	1.28748	yes	yes	0.488054	-0.311532
	FLII	190.702	156.335	62.1223	72.5617	22668.6	22618.6	173.518	67.342	22643.6	2.57667	1.36551	yes	yes	0.468903	-0.328917
	ALDH1L2	120.983	33.6928	13.862	12.3509	22597.2	22643.6	77.338	13.1065	22620.4	5.90075	2.5609	yes	yes	0.283954	-0.546752
	PPP1CC	344.494	235.85	165.831	180.632	22024.8	23210.7	290.172	173.231	22617.8	1.67505	0.744207	yes	yes	0.517029
	SUMO3	182.5	105.122	35.4251	47.0879	22224.7	23003.2	143.811	41.2565	22613.9	3.48577	1.80148	yes	yes	0.4535	-0.343423
	MID1IP1	118.933	66.0379	18.9961	20.8422	22353.9	22817.4	92.4852	19.9191	22585.7	4.64303	2.21507	yes	yes	0.321293	-0.493099
	SUPT6H	123.034	106.469	43.1262	56.3511	22771.5	22385	114.751	49.7387	22578.2	2.30709	1.20607	yes	yes	0.287944	-0.540691
	LONP1	135.337	75.4719	25.157	32.4212	22765.6	22387.1	105.404	28.7891	22576.4	3.66127	1.87234	yes	yes	0.339361	-0.469338
	GID8	123.034	64.6902	23.1033	39.3686	22281.7	22861.9	93.8619	31.236	22571.8	3.00493	1.58733	yes	yes	0.277452	-0.556812
	ALDH18A1	145.59	79.515	33.3715	39.3686	22270.6	22859.8	112.552	36.37	22565.2	3.09465	1.62977	yes	yes	0.33761	-0.471584
	ID1	153.792	97.0352	40.0458	57.1231	22643.9	22468.6	125.414	48.5844	22556.3	2.58136	1.36813	yes	yes	0.340611	-0.467741
	SPAG9	174.298	102.426	52.3675	60.2108	22374.3	22662	138.362	56.2892	22518.2	2.45806	1.29752	yes	yes	0.364473	-0.438335
	LITAF	143.539	84.9058	39.5324	44.7721	22191.5	22781.5	114.223	42.1522	22486.5	2.70976	1.43817	yes	yes	0.320504	-0.494166
	DYNC1LI2	192.753	128.033	44.153	49.4037	22213.6	22755.5	160.393	46.7784	22484.5	3.42878	1.77769	yes	yes	0.5053	-0.296451
	SENP6	131.236	74.1241	26.1838	35.5089	21894.7	22989.1	102.68	30.8464	22441.9	3.32876	1.73498	yes	yes	0.320088	-0.494731
	GRHL2	155.843	67.3856	18.4827	33.9651	22693.3	22172	111.614	26.2239	22432.6	4.2562	2.08957	yes	yes	0.380652	-0.419472
	BRIP1	145.59	88.949	25.157	40.1405	22260.4	22584.9	117.269	32.6487	22422.6	3.59185	1.84473	yes	yes	0.377389	-0.42321
	SSR1	133.286	84.9058	34.9117	39.3686	21845.4	22976	109.096	37.1401	22410.7	2.93742	1.55455	yes	yes	0.321079	-0.493388
	AFF4	164.045	88.949	26.1838	34.737	22331.8	22468.6	126.497	30.4604	22400.2	4.15283	2.0541	yes	yes	0.42873	-0.367816
	PURB	168.146	78.1673	24.6435	43.2283	21958.5	22796.8	123.157	33.9359	22377.6	3.6291	1.85961	yes	yes	0.398705	-0.399348
	SMIM14	79.9719	52.5608	26.6972	34.737	22045.2	22704.4	66.2663	30.7171	22374.8	2.15731	1.10923	yes	yes	0.158881	-0.798929
	HIP1R	112.781	72.7764	24.1301	23.9299	22960.3	21768.9	92.7787	24.03	22364.6	3.86095	1.94895	yes	yes	0.307399	-0.512298
	PACS2	123.034	68.7333	28.2374	37.0528	22849.7	21839.6	95.8835	32.6451	22344.7	2.93715	1.55442	yes	yes	0.283014	-0.548193
	GOLGA4	153.792	91.6444	40.0458	40.1405	22247.6	22412.1	122.718	40.0931	22329.9	3.06083	1.61392	yes	yes	0.37002	-0.431774
	RAF1	131.236	107.817	37.9921	55.5792	22210.2	22438.2	119.526	46.7857	22324.2	2.55477	1.35319	yes	yes	0.325838	-0.486998
	C19orf48	90.2247	72.7764	26.1838	27.0177	22287.6	22283.9	81.5006	26.6007	22285.8	3.06385	1.61534	yes	yes	0.246345	-0.608456
	ABCA2	114.831	66.0379	27.724	33.1931	23090.4	21470.2	90.4347	30.4586	22280.3	2.9691	1.57003	yes	yes	0.269189	-0.569943
	YES1	135.337	80.8627	36.4519	42.4563	21871.7	22682.7	108.1	39.4541	22277.2	2.73989	1.45412	yes	yes	0.308143	-0.511247
	POLR2A	196.854	82.2104	33.8849	44.0002	23568.4	20972.5	139.532	38.9425	22270.5	3.58303	1.84118	yes	yes	0.451673	-0.345176
	SCAF11	188.652	72.7764	31.8312	44.0002	21940.6	22575.1	130.714	37.9157	22257.9	3.44749	1.78555	yes	yes	0.416924	-0.379943
	ECHS1	73.8202	59.2993	25.157	35.5089	22018.9	22467.6	66.5598	30.3329	22243.2	2.19431	1.13376	yes	yes	0.162867	-0.788167
	BIRC6	143.539	75.4719	31.3178	35.5089	23198.4	21286.5	109.506	33.4134	22242.5	3.2773	1.71251	yes	yes	0.342103	-0.465843
	PKP4	176.348	74.1241	37.4787	38.5967	21935.5	22540.3	125.236	38.0377	22237.9	3.29242	1.71915	yes	yes	0.392116	-0.406585
	MCM2	164.045	111.86	50.8273	67.1582	22148.1	22281.8	137.952	58.9928	22214.9	2.33846	1.22556	yes	yes	0.355435	-0.44924
	IER2	141.489	51.213	25.157	26.2457	22414.3	21969.9	96.3509	25.7013	22192.1	3.74887	1.90645	yes	yes	0.318354	-0.49709
	RANBP2	164.045	111.86	43.6396	48.6318	22871.9	21431	137.952	46.1357	22151.4	2.99015	1.58022	yes	yes	0.414496	-0.38248
	LRBA	92.2753	49.8653	19.5095	34.737	22703.5	21591.8	71.0703	27.1232	22147.7	2.62027	1.38972	yes	yes	0.198428	-0.702398
	UCP2	164.045	74.1241	24.6435	39.3686	21995.1	22275.2	119.085	32.0061	22135.1	3.72069	1.89557	yes	yes	0.393395	-0.405172
	SMARCC1	149.691	90.2967	29.7776	42.4563	21836	22400.2	119.994	36.117	22118.1	3.32237	1.73221	yes	yes	0.379223	-0.421106
	PTGES2	100.478	76.8196	28.2374	35.5089	22125.2	22109	88.6485	31.8732	22117.1	2.78129	1.47575	yes	yes	0.256704	-0.590568
	NNT	143.539	60.647	23.1033	28.5615	21847.9	22299.1	102.093	25.8324	22073.5	3.95213	1.98263	yes	yes	0.345485	-0.461571
	MACF1	168.146	74.1241	27.2106	41.6844	22978.2	21165.9	121.135	34.4475	22072	3.51651	1.81415	yes	yes	0.392748	-0.405886
	OSBPL8	104.579	80.8627	27.724	50.9476	21517.1	22587.1	92.7207	39.3358	22052.1	2.35716	1.23705	yes	yes	0.242085	-0.616031
	TP53	141.489	56.6039	27.724	17.7545	21866.6	22201.4	99.0463	22.7392	22034	4.35575	2.12292	yes	yes	0.346315	-0.460528
	PLD3	139.438	72.7764	29.7776	31.6493	21859	22168.8	106.107	30.7134	22013.9	3.45475	1.78858	yes	yes	0.342483	-0.46536
	NOB1	108.68	72.7764	32.8581	35.5089	21673.6	22337.2	90.7281	34.1835	22005.4	2.65415	1.40825	yes	yes	0.256958	-0.590138
	SEC63	82.0225	70.081	26.6972	34.737	21584.3	22392.6	76.0517	30.7171	21988.4	2.47588	1.30794	yes	yes	0.206175	-0.685764
	ARF6	164.045	106.469	40.5592	64.8424	21615.8	22266.5	135.257	52.7008	21941.2	2.56651	1.35981	yes	yes	0.376262	-0.424509
	RAB1A	182.5	136.119	81.6318	85.6846	21409.9	22441.5	159.309	83.6582	21925.7	1.90429	0.929253	yes	yes	0.345034
	TARS1	149.691	90.2967	31.8312	32.4212	21474.6	22375.2	119.994	32.1262	21924.9	3.73507	1.90114	yes	yes	0.400767	-0.397109
	TRIO	172.247	105.122	33.8849	42.4563	22449.2	21390.8	138.684	38.1706	21920	3.63328	1.86127	yes	yes	0.458548	-0.338615
	UBL3	127.135	37.7359	22.5899	40.9125	21368.3	22448	82.4354	31.7512	21908.1	2.59629	1.37645	yes	yes	0.231349	-0.635733
	PDXK	133.286	152.291	50.8273	59.4389	21861.5	21925.4	142.789	55.1331	21893.5	2.5899	1.37289	yes	yes	0.400375	-0.397533
	HES1	125.084	30.9974	20.5363	13.1229	22183	21601.6	78.0408	16.8296	21892.3	4.63712	2.21323	yes	yes	0.279602	-0.55346
	CDIPT	112.781	79.515	29.2642	46.316	21682.1	22102.5	96.1479	37.7901	21892.3	2.54426	1.34725	yes	yes	0.266568	-0.574192
	MAP1LC3B	92.2753	40.4313	18.9961	26.2457	21366.6	22414.3	66.3533	22.6209	21890.4	2.93327	1.55251	yes	yes	0.199779	-0.699451
	AAMP	151.742	88.949	44.153	43.2283	21555.4	22181.8	120.345	43.6906	21868.6	2.75449	1.46178	yes	yes	0.350524	-0.455282
	GOLM1	180.449	98.3829	42.0994	44.0002	21509.4	22178.5	139.416	43.0498	21844	3.23849	1.69532	yes	yes	0.441157	-0.355407
	PLK2	139.438	102.426	25.157	53.2634	21624.3	22003.6	120.932	39.2102	21813.9	3.0842	1.6249	yes	yes	0.374632	-0.426395
	ABHD12	123.034	60.647	16.9424	25.4738	21789.2	21836.3	91.8404	21.2081	21812.8	4.33043	2.11451	yes	yes	0.323811	-0.489708
	MDM2	137.388	56.6039	21.5631	27.0177	21510.3	22086.2	96.9958	24.2904	21798.2	3.99317	1.99754	yes	yes	0.333538	-0.476855
	SUPT5H	190.702	138.814	49.2871	64.8424	21815.6	21707	164.758	57.0647	21761.3	2.88722	1.52968	yes	yes	0.494885	-0.305495
	SEC24C	164.045	92.9921	41.586	40.9125	21841.1	21652.7	128.519	41.2492	21746.9	3.11566	1.63954	yes	yes	0.401295	-0.396536
	PTK2	194.803	86.2535	36.4519	40.9125	21310.4	22172	140.528	38.6822	21741.2	3.6329	1.86112	yes	yes	0.468447	-0.329339
	SPTBN1	217.36	203.504	78.5513	80.2811	22345.4	21121.4	210.432	79.4162	21733.4	2.64974	1.40585	yes	yes	0.602831	-0.219804
	RCC1	155.843	113.208	44.153	71.7898	21330.9	22024.3	134.525	57.9714	21677.6	2.32054	1.21446	yes	yes	0.353148	-0.452044
	MYO1C	145.59	94.3398	63.6625	60.9827	21557.9	21797.2	119.965	62.3226	21677.6	1.9249	0.944784	yes	yes	0.265907
	SHTN1	141.489	84.9058	31.3178	46.316	21421	21928.7	113.197	38.8169	21674.8	2.91618	1.54408	yes	yes	0.343165	-0.464497
	WWP1	104.579	67.3856	26.1838	25.4738	21236.5	22029.7	85.9821	25.8288	21633.1	3.32893	1.73506	yes	yes	0.278062	-0.555859
	KIF22	106.629	91.6444	34.3983	40.9125	21764.6	21484.3	99.1368	37.6554	21624.4	2.63274	1.39656	yes	yes	0.284315	-0.546201
	ATP5F1E	151.742	97.0352	44.153	49.4037	21504.3	21722.2	124.388	46.7784	21613.3	2.6591	1.41094	yes	yes	0.359085	-0.444803
	SRPRA	149.691	125.337	42.6128	53.2634	21341.9	21832	137.514	47.9381	21586.9	2.86858	1.52033	yes	yes	0.414955	-0.381999
	ILRUN	114.831	83.5581	47.7469	42.4563	21411.6	21715.7	99.1948	45.1016	21563.7	2.19936	1.13709	yes	yes	0.250853	-0.60058
	PNRC2	127.135	49.8653	17.4558	29.3335	21003.4	22123.1	88.5001	23.3947	21563.3	3.78292	1.9195	yes	yes	0.301927	-0.520098
	EI24	129.185	99.7307	36.4519	40.9125	21168.4	21937.3	114.458	38.6822	21552.9	2.95893	1.56508	yes	yes	0.351581	-0.453975
	JUN	82.0225	51.213	20.0229	27.7896	22147.3	20915	66.6178	23.9062	21531.1	2.78663	1.47852	yes	yes	0.198371	-0.702522
	TFRC	225.562	184.636	89.3329	104.983	21289.2	21740.7	205.099	97.1579	21514.9	2.11099	1.07792	yes	yes	0.501704	-0.299553
	BCL2L1	141.489	101.078	41.0726	51.7195	21429.5	21587.5	121.284	46.3961	21508.5	2.61409	1.38631	yes	yes	0.348176	-0.458201
	STX16	106.629	57.9516	20.5363	26.2457	21275.6	21716.8	82.2904	23.391	21496.2	3.51804	1.81477	yes	yes	0.273999	-0.562251
	DHCR7	168.146	79.515	42.0994	50.1757	21478.8	21469.1	123.831	46.1375	21473.9	2.68394	1.42435	yes	yes	0.361801	-0.44153
	SNHG8	102.528	48.5176	20.0229	19.2983	21266.2	21664.6	75.5228	19.6606	21465.4	3.84133	1.94161	yes	yes	0.260243	-0.584621
	OSBPL9	168.146	94.3398	34.3983	28.5615	21182	21691.8	131.243	31.4799	21436.9	4.1691	2.05974	yes	yes	0.46538	-0.332193
	EIF3I	161.994	118.599	47.2335	66.3863	21338.5	21533.2	140.296	56.8099	21435.8	2.46958	1.30427	yes	yes	0.389472	-0.409524
	ACLY	221.461	177.898	77.0111	76.4214	21522.2	21328.9	199.679	76.7162	21425.6	2.60283	1.38008	yes	yes	0.573908	-0.241157
	PRELID3B	151.742	57.9516	32.8581	47.0879	20788.3	22055.8	104.847	39.973	21422	2.62294	1.39118	yes	yes	0.302836	-0.518793
	WASF2	133.286	66.0379	32.3447	42.4563	21274.7	21540.8	99.6622	37.4005	21407.7	2.66473	1.41399	yes	yes	0.290837	-0.53635
	MOB1A	153.792	72.7764	35.9385	47.8599	20942.2	21872.2	113.284	41.8992	21407.2	2.70373	1.43495	yes	yes	0.333463	-0.476952
	TUBB4B	266.573	268.195	117.57	136.632	21277.3	21534.3	267.384	127.101	21405.8	2.10371	1.07293	yes	yes	0.65535	-0.183527
	ZNF598	147.64	67.3856	33.8849	38.5967	21449.1	21298.5	107.513	36.2408	21373.8	2.96663	1.56883	yes	yes	0.333456	-0.476961
	VAPA	149.691	79.515	44.153	41.6844	21126.7	21616.8	114.603	42.9187	21371.8	2.67023	1.41697	yes	yes	0.335415	-0.474417
	ZC3H7B	120.983	72.7764	24.6435	32.4212	21224.5	21471.2	96.8798	28.5324	21347.9	3.39543	1.7636	yes	yes	0.32016	-0.494633
	H2AJ	143.539	66.0379	20.5363	35.5089	21216.9	21472.3	104.789	28.0226	21344.6	3.73943	1.90282	yes	yes	0.35965	-0.444119
	NCOA4	141.489	75.4719	29.2642	44.0002	21073.2	21602.7	108.48	36.6322	21337.9	2.96134	1.56625	yes	yes	0.336715	-0.472737
	PI4KB	141.489	59.2993	32.3447	43.2283	21370.8	21290.9	100.394	37.7865	21330.9	2.65688	1.40973	yes	yes	0.293507	-0.532381
	CLDN3	84.073	36.3882	10.2681	23.9299	20978.8	21674.4	60.2306	17.099	21326.6	3.52246	1.81658	yes	yes	0.202243	-0.694126
	HCFC1	178.399	123.989	53.3944	58.6669	22069.9	20565.1	151.194	56.0306	21317.5	2.69842	1.43211	yes	yes	0.44641	-0.350266
	PPP6R3	172.247	90.2967	43.6396	47.0879	20972	21635.3	131.272	45.3638	21303.6	2.89376	1.53295	yes	yes	0.403256	-0.394419
	RAP2C	120.983	70.081	23.1033	31.6493	20903.9	21702.7	95.5321	27.3763	21303.3	3.48959	1.80306	yes	yes	0.319931	-0.494944
	TMOD3	168.146	78.1673	50.8273	50.1757	21039.2	21563.6	123.157	50.5015	21301.4	2.43867	1.2861	yes	yes	0.341082	-0.467141
	DIAPH1	170.197	128.033	52.8809	67.1582	21171.8	21420.2	149.115	60.0196	21296	2.48443	1.31292	yes	yes	0.418365	-0.378444
	RAD51C	153.792	66.0379	23.6167	42.4563	20716.8	21864.5	109.915	33.0365	21290.7	3.32707	1.73425	yes	yes	0.36109	-0.442385
	DGKZ	149.691	84.9058	33.3715	51.7195	21512.8	21068.1	117.298	42.5455	21290.5	2.75701	1.4631	yes	yes	0.351109	-0.454558
	HMG20B	125.084	59.2993	20.0229	28.5615	21155.7	21406	92.1918	24.2922	21280.9	3.79512	1.92414	yes	yes	0.319064	-0.496122
	KDM3B	108.68	63.3424	35.9385	32.4212	21480.5	21045.3	86.0111	34.1799	21262.9	2.51643	1.33138	yes	yes	0.243763	-0.613031
	CBX1	133.286	72.7764	39.019	52.4915	20637.7	21885.2	103.031	45.7552	21261.5	2.2518	1.17108	yes	yes	0.26939	-0.569619
	ARID1A	168.146	88.949	34.3983	50.1757	21835.2	20677	128.548	42.287	21256.1	3.03988	1.60402	yes	yes	0.405816	-0.391671
	ETFA	159.944	107.817	47.7469	48.6318	20833.3	21659.2	133.88	48.1893	21246.3	2.77822	1.47416	yes	yes	0.403323	-0.394347
	ARFGAP2	129.185	67.3856	31.8312	40.9125	21239	21240.9	98.2855	36.3719	21240	2.70224	1.43416	yes	yes	0.291496	-0.535367
	RETREG2	104.579	39.0836	18.9961	22.3861	21129.3	21339.8	71.8311	20.6911	21234.5	3.4716	1.7956	yes	yes	0.240834	-0.618281
	GDI1	151.742	86.2535	32.3447	37.0528	21255.2	21206.1	118.998	34.6987	21230.6	3.42945	1.77798	yes	yes	0.397062	-0.401142
	CD46	129.185	82.2104	36.4519	42.4563	20760.2	21677.7	105.698	39.4541	21218.9	2.67901	1.4217	yes	yes	0.312192	-0.505579
	TWSG1	77.9213	37.7359	13.3486	18.5264	20697.3	21721.1	57.8286	15.9375	21209.2	3.62846	1.85936	yes	yes	0.197514	-0.704402
	POGK	153.792	101.078	35.4251	35.5089	20881.8	21519	127.435	35.467	21200.4	3.59306	1.84521	yes	yes	0.433804	-0.362707
	HDAC1	149.691	84.9058	43.6396	40.9125	20693	21703.7	117.298	42.276	21198.4	2.77458	1.47227	yes	yes	0.353906	-0.451112
	MAPK8IP3	139.438	60.647	18.4827	26.2457	21950.8	20385.8	100.043	22.3642	21168.3	4.47334	2.16135	yes	yes	0.366956	-0.435386
	SERPINH1	153.792	88.949	35.9385	50.1757	21098.7	21236.6	121.371	43.0571	21167.6	2.81883	1.4951	yes	yes	0.369968	-0.431836
	PFDN5	133.286	92.9921	41.0726	29.3335	21026.4	21306.1	113.139	35.203	21166.2	3.21391	1.68433	yes	yes	0.36821	-0.433904
	ZDHHC20	112.781	52.5608	23.1033	32.4212	20779.8	21551.6	82.6708	27.7623	21165.7	2.97781	1.57425	yes	yes	0.259422	-0.585993
	DICER1	118.933	92.9921	37.9921	36.2809	21159.1	21155.1	105.962	37.1365	21157.1	2.85332	1.51264	yes	yes	0.325309	-0.487704
	KMT2C	127.135	45.8222	26.6972	27.0177	21989.9	20300	86.4785	26.8574	21145	3.21991	1.68702	yes	yes	0.281963	-0.549807
	JUNB	178.399	68.7333	25.157	41.6844	21553.7	20711.8	123.566	33.4207	21132.7	3.69729	1.88647	yes	yes	0.426568	-0.370012
	METTL9	180.449	91.6444	32.3447	50.9476	20757.7	21469.1	136.047	41.6461	21113.4	3.26674	1.70785	yes	yes	0.447114	-0.349582
	PDCD6IP	157.893	84.9058	39.5324	42.4563	20956.7	21260.5	121.4	40.9943	21108.6	2.96137	1.56627	yes	yes	0.380913	-0.419174
	EIF4G3	147.64	70.081	30.291	42.4563	21287.5	20890	108.861	36.3737	21088.7	2.99284	1.58152	yes	yes	0.343724	-0.46379
	UBA2	205.056	102.426	59.0418	56.3511	20494.9	21680.9	153.741	57.6965	21087.9	2.66465	1.41395	yes	yes	0.455449	-0.34156
	IFITM3	110.73	45.8222	17.4558	25.4738	20560.4	21583.1	78.2763	21.4648	21071.7	3.64672	1.8666	yes	yes	0.269609	-0.569265
	C11orf58	149.691	97.0352	36.4519	44.0002	20551.8	21560.3	123.363	40.2261	21056.1	3.06675	1.61671	yes	yes	0.394836	-0.403583
	ADCY6	127.135	53.9085	26.1838	29.3335	21753.5	20343.5	90.5216	27.7586	21048.5	3.26103	1.70533	yes	yes	0.298183	-0.525517
	EXOC7	178.399	90.2967	29.7776	57.1231	21388.7	20687.9	134.348	43.4503	21038.3	3.09198	1.62853	yes	yes	0.432057	-0.364459
	RALBP1	139.438	82.2104	40.5592	34.737	20607.1	21400.6	110.824	37.6481	21003.9	2.94369	1.55763	yes	yes	0.348394	-0.457929
	TLN1	168.146	115.903	49.8005	54.8073	21738.2	20257.6	142.025	52.3039	20997.9	2.71537	1.44115	yes	yes	0.427284	-0.369283
	MBD6	102.528	41.7791	12.3218	20.8422	21322.3	20591.2	72.1536	16.582	20956.8	4.35132	2.12145	yes	yes	0.265173	-0.576471
	PSMD3	151.742	91.6444	50.8273	58.6669	20778.1	21130.1	121.693	54.7471	20954.1	2.22282	1.15239	yes	yes	0.319488	-0.495545
	SEPTIN11	168.146	86.2535	41.0726	37.8247	20562.9	21345.2	127.2	39.4487	20954.1	3.22444	1.68905	yes	yes	0.418779	-0.378015
	CEP170B	114.831	55.2562	34.9117	48.6318	21354.7	20530.3	85.0438	41.7717	20942.5	2.03592	1.02568	yes	yes	0.206623	-0.684821
	ATXN1L	100.478	68.7333	28.7508	33.9651	20690.5	21192	84.6054	31.3579	20941.2	2.69805	1.43192	yes	yes	0.254271	-0.594703
	GNPTAB	137.388	59.2993	27.2106	37.8247	20609.7	21249.6	98.3435	32.5177	20929.6	3.02431	1.59661	yes	yes	0.31451	-0.502365
	SPG7	114.831	64.6902	24.1301	36.2809	21792.6	20049	89.7608	30.2055	20920.8	2.97167	1.57127	yes	yes	0.28467	-0.545659
	EIF5B	176.348	118.599	50.3139	44.7721	20795.1	21046.4	147.473	47.543	20920.7	3.10189	1.63315	yes	yes	0.477662	-0.320879
	TMEM94	84.073	49.8653	15.9156	22.3861	21456.7	20356.5	66.9692	19.1508	20906.6	3.49693	1.80609	yes	yes	0.228724	-0.640689
	C14orf132	123.034	49.8653	28.2374	28.5615	20699.8	21039.9	86.4495	28.3995	20869.9	3.04405	1.60599	yes	yes	0.278153	-0.555717
	NHP2	127.135	94.3398	32.3447	44.7721	20835	20866.1	110.737	38.5584	20850.6	2.87194	1.52202	yes	yes	0.346173	-0.460707
	PFKFB3	123.034	109.165	45.6932	40.9125	20690.5	21006.2	116.099	43.3029	20848.3	2.6811	1.42282	yes	yes	0.349171	-0.456962
	TACC1	137.388	52.5608	31.3178	45.5441	20784	20911.7	94.9742	38.431	20847.9	2.47129	1.30527	yes	yes	0.271218	-0.566681
	CLNS1A	135.337	91.6444	31.8312	37.8247	20323.9	21355	113.491	34.828	20839.5	3.25861	1.70426	yes	yes	0.37747	-0.423117
	NECTIN1	120.983	66.0379	31.3178	50.9476	20915.8	20756.3	93.5105	41.1327	20836.1	2.27338	1.18484	yes	yes	0.25138	-0.599669
	DUSP16	131.236	74.1241	28.7508	34.737	20587.6	21064.9	102.68	31.7439	20826.2	3.23464	1.6936	yes	yes	0.34061	-0.467743
	SF3A1	133.286	72.7764	28.2374	32.4212	20535.7	21112.7	103.031	30.3293	20824.2	3.39709	1.7643	yes	yes	0.349124	-0.457021
	FAM168A	100.478	55.2562	21.0497	29.3335	20859.7	20747.6	77.8668	25.1916	20803.7	3.09099	1.62807	yes	yes	0.253202	-0.596533
	DST	143.539	76.8196	37.4787	39.3686	21427.8	20138.1	110.179	38.4237	20783	2.86749	1.51979	yes	yes	0.345263	-0.461851
	GLUD1	168.146	88.949	46.2067	47.0879	20446.4	21119.2	128.548	46.6473	20782.8	2.75573	1.46244	yes	yes	0.394077	-0.404419
	ADCY9	106.629	41.7791	15.9156	25.4738	20937.9	20611.8	74.2041	20.6947	20774.9	3.58566	1.84224	yes	yes	0.257568	-0.589108
	SRSF10	424.466	365.23	207.93	202.247	20228.7	21276.8	394.848	205.088	20752.7	1.92526	0.945053	yes	yes	0.914385
	TCF3	108.68	74.1241	29.2642	38.5967	20859.7	20635.7	91.4019	33.9304	20747.7	2.6938	1.42964	yes	yes	0.277002	-0.557518
	SREBF2	153.792	61.9947	39.019	45.5441	20649.6	20835.6	107.893	42.2815	20742.6	2.55179	1.35151	yes	yes	0.316314	-0.499881
	CEBPG	129.185	70.081	17.4558	30.8773	20368.2	21114.9	99.6332	24.1666	20741.5	4.12277	2.04361	yes	yes	0.363843	-0.439086
	LRRFIP1	139.438	86.2535	36.9653	37.8247	20433.6	21034.5	112.846	37.395	20734.1	3.01767	1.59344	yes	yes	0.363898	-0.43902
	ATMIN	112.781	83.5581	28.7508	38.5967	20344.3	21048.6	98.1695	33.6737	20696.5	2.91531	1.54365	yes	yes	0.311627	-0.506365
	CDT1	77.9213	35.0405	12.8352	14.6667	20663.3	20715	56.4809	13.751	20689.1	4.10742	2.03823	yes	yes	0.206533	-0.68501
	EIF2S2	147.64	97.0352	46.2067	51.7195	20266.1	21101.8	122.338	48.9631	20684	2.49857	1.3211	yes	yes	0.354742	-0.450087
	PARP14	104.579	40.4313	18.9961	19.2983	20986.4	20378.2	72.505	19.1472	20682.3	3.78672	1.92095	yes	yes	0.257987	-0.588402
	JUND	96.3764	29.6497	16.429	23.9299	20906.5	20444.5	63.013	20.1795	20675.5	3.12263	1.64276	yes	yes	0.207171	-0.683672
	PABPC1L	110.73	43.1268	14.8888	14.6667	21191.4	20102.3	76.9285	14.7778	20646.8	5.20569	2.38009	yes	yes	0.301019	-0.521407
	DAP	118.933	71.4287	32.8581	41.6844	20323.9	20962.8	95.1806	37.2712	20643.3	2.55373	1.35261	yes	yes	0.280523	-0.552031
	EIF4A3	141.489	107.817	47.2335	50.1757	20764.5	20510.8	124.653	48.7046	20637.6	2.55937	1.35579	yes	yes	0.368009	-0.434142
	RAP1GAP	79.9719	53.9085	30.291	33.1931	20807.8	20466.2	66.9402	31.7421	20637	2.10888	1.07648	yes	yes	0.170558	-0.768128
	CAP1	149.691	156.335	56.9882	57.1231	20216.8	21029	153.013	57.0556	20622.9	2.68182	1.42321	yes	yes	0.465294	-0.332273
	UHMK1	106.629	55.2562	21.5631	40.1405	20138.5	21100.7	80.9427	30.8518	20619.6	2.6236	1.39155	yes	yes	0.242928	-0.614522
	MKRN1	141.489	67.3856	21.0497	27.0177	20102	21114.9	104.437	24.0337	20608.4	4.34545	2.11951	yes	yes	0.390149	-0.40877
	FAM91A1	141.489	80.8627	35.4251	37.0528	20210	20963.8	111.176	36.2389	20586.9	3.06785	1.61723	yes	yes	0.364002	-0.438896
	ARFGEF2	120.983	55.2562	25.6704	25.4738	20518.7	20652	88.1197	25.5721	20585.4	3.44593	1.78489	yes	yes	0.303845	-0.517348
	MIDEAS	139.438	52.5608	20.0229	30.8773	20915.8	20222.9	95.9995	25.4501	20569.3	3.77207	1.91535	yes	yes	0.342983	-0.464727
	BAG3	157.893	97.0352	39.5324	59.4389	20665	20442.3	127.464	49.4856	20553.6	2.57578	1.36501	yes	yes	0.379391	-0.420913
	RFX5	96.3764	40.4313	16.9424	28.5615	19943.8	21155.1	68.4039	22.752	20549.4	3.0065	1.58809	yes	yes	0.222157	-0.653341
	SMC4	166.095	91.6444	44.153	42.4563	20546.7	20530.3	128.87	43.3047	20538.5	2.97589	1.57332	yes	yes	0.416608	-0.380272
	SEMA3C	129.185	67.3856	30.291	24.7019	20364.7	20707.4	98.2855	27.4964	20536.1	3.57448	1.83773	yes	yes	0.344705	-0.462552
	ATP5PB	188.652	92.9921	43.6396	52.4915	19918.3	21129	140.822	48.0655	20523.6	2.92979	1.5508	yes	yes	0.451949	-0.344911
	SLC25A1	137.388	83.5581	30.8044	39.3686	20392	20603.1	110.473	35.0865	20497.5	3.14858	1.6547	yes	yes	0.367782	-0.434409
	AVL9	86.1236	60.647	19.5095	26.2457	20111.3	20744.4	73.3853	22.8776	20427.8	3.20774	1.68156	yes	yes	0.247249	-0.606865
	PAICS	149.691	118.599	56.9882	62.5266	20185.3	20634.6	134.145	59.7574	20410	2.24482	1.1666	yes	yes	0.364466	-0.438343
	PACS1	131.236	63.3424	26.6972	28.5615	20553.5	20259.8	97.2892	27.6294	20406.7	3.52123	1.81608	yes	yes	0.341358	-0.46679
	ITGAV	182.5	105.122	49.2871	47.8599	20173.4	20633.6	143.811	48.5735	20403.5	2.96068	1.56593	yes	yes	0.46677	-0.330897
	PDIA4	190.702	90.2967	55.9614	57.895	20312.9	20479.3	140.499	56.9282	20396.1	2.46801	1.30335	yes	yes	0.409742	-0.38749
	LMNB1	133.286	88.949	35.9385	46.316	20149.6	20616.2	111.118	41.1273	20382.9	2.7018	1.43392	yes	yes	0.343379	-0.464227
	SSR2	147.64	63.3424	27.724	50.9476	20090.9	20661.8	105.491	39.3358	20376.4	2.68182	1.42321	yes	yes	0.324669	-0.48856
	POGZ	127.135	44.4745	27.2106	25.4738	20700.7	20049	85.8046	26.3422	20374.8	3.25731	1.70368	yes	yes	0.291842	-0.534852
	RMND5A	79.9719	29.6497	13.3486	13.8948	20039.9	20670.5	54.8108	13.6217	20355.2	4.02379	2.00855	yes	yes	0.202352	-0.693893
	E2F4	153.792	90.2967	34.3983	43.2283	20468.5	20193.5	122.044	38.8133	20331	3.1444	1.65278	yes	yes	0.40938	-0.387873
	PANK3	137.388	82.2104	26.6972	37.8247	19914.9	20698.7	109.799	32.261	20306.8	3.40346	1.767	yes	yes	0.381833	-0.418127
	CLUH	159.944	113.208	48.2603	51.7195	20598.6	19993.6	136.576	49.9899	20296.1	2.73207	1.44999	yes	yes	0.426613	-0.369966
	CTDSP1	100.478	57.9516	22.0765	36.2809	20152.1	20416.3	79.2146	29.1787	20284.2	2.71481	1.44085	yes	yes	0.246674	-0.607876
	IQSEC1	116.882	78.1673	27.724	34.737	20318.8	20191.4	97.5246	31.2305	20255.1	3.12274	1.64281	yes	yes	0.327296	-0.485059
	C6orf89	110.73	61.9947	25.6704	37.0528	20040.7	20442.3	86.3625	31.3616	20241.5	2.75377	1.46141	yes	yes	0.271723	-0.565873
	TUBB	256.32	142.857	100.114	90.3162	19910.6	20540.1	199.589	95.2153	20225.4	2.09618	1.06777	yes	yes	0.516053	-0.287306
	NEBL	131.236	47.1699	17.4558	30.1054	19754.1	20664	89.2029	23.7806	20209.1	3.75108	1.9073	yes	yes	0.323728	-0.48982
	GTF2I	149.691	67.3856	24.6435	32.4212	20136	20222.9	108.538	28.5324	20179.4	3.80404	1.92753	yes	yes	0.396473	-0.401787
	PHF3	123.034	66.0379	35.4251	44.7721	19889.4	20464.1	94.5358	40.0986	20176.7	2.35758	1.23731	yes	yes	0.269802	-0.568955
	ANXA11	159.944	80.8627	37.9921	37.8247	20085.8	20243.5	120.403	37.9084	20164.7	3.17616	1.66728	yes	yes	0.409106	-0.388164
	CDK2AP1	127.135	82.2104	40.0458	67.9301	19857.9	20461.9	104.673	53.9879	20159.9	1.93881	0.955175	yes	yes	0.251413
	VEGFA	127.135	63.3424	18.9961	16.9825	19948	20371.7	95.2386	17.9893	20159.9	5.29418	2.40441	yes	yes	0.383184	-0.416593
	DHX15	280.927	214.286	127.838	107.299	19948	20360.8	247.607	117.569	20154.4	2.10606	1.07455	yes	yes	0.645208	-0.1903
	STAU1	139.438	61.9947	24.6435	47.0879	19768.6	20502.1	100.716	35.8657	20135.3	2.80815	1.48962	yes	yes	0.322074	-0.492044
	AMOTL2	135.337	53.9085	32.8581	35.5089	20210.8	20049	94.6228	34.1835	20129.9	2.76808	1.46889	yes	yes	0.300246	-0.522523
	NUTF2	143.539	75.4719	35.4251	53.2634	20021.2	20237	109.506	44.3442	20129.1	2.46944	1.30419	yes	yes	0.323717	-0.489834
	NUP160	106.629	60.647	34.9117	31.6493	20107.9	20147.9	83.6381	33.2805	20127.9	2.51313	1.32948	yes	yes	0.250188	-0.601733
	CSNK1A1	276.826	181.941	120.137	128.141	19772.8	20476	229.383	124.139	20124.4	1.84779	0.885803	yes	yes	0.522968
	DNAJC5	137.388	60.647	25.6704	33.1931	19887.6	20318.5	99.0173	29.4317	20103.1	3.3643	1.75031	yes	yes	0.346144	-0.460743
	CGGBP1	104.579	59.2993	18.9961	22.3861	19771.1	20431.5	81.939	20.6911	20101.3	3.96011	1.98554	yes	yes	0.304696	-0.516133
	ERH	176.348	94.3398	49.8005	60.2108	19351	20834.6	135.344	55.0057	20092.8	2.46055	1.29898	yes	yes	0.399837	-0.398117
	ADNP	149.691	49.8653	26.1838	29.3335	19906.4	20200	99.7782	27.7586	20053.2	3.59449	1.84579	yes	yes	0.359142	-0.444733
	ZFP36L1	118.933	95.6875	30.291	43.2283	20155.5	19942.5	107.31	36.7596	20049	2.91924	1.54559	yes	yes	0.351889	-0.453594
	YLPM1	114.831	79.515	32.3447	54.8073	20564.6	19517.7	97.1732	43.576	20041.2	2.22997	1.15703	yes	yes	0.267436	-0.57278
	VEZF1	172.247	83.5581	48.2603	60.9827	19704	20358.7	127.903	54.6215	20031.3	2.34162	1.22751	yes	yes	0.365833	-0.436717
	SIKE1	135.337	75.4719	24.1301	32.4212	19693.7	20364.1	105.404	28.2757	20028.9	3.72774	1.8983	yes	yes	0.385087	-0.414441
	POLE	155.843	76.8196	36.9653	56.3511	20377.5	19636.2	116.331	46.6582	20006.8	2.49326	1.31803	yes	yes	0.348246	-0.458114
	ADIPOR1	137.388	78.1673	40.0458	57.895	19762.6	20241.3	107.777	48.9704	20002	2.20087	1.13807	yes	yes	0.294006	-0.531644
	AP1M2	125.084	63.3424	18.4827	20.8422	19580.6	20417.3	94.2133	19.6624	19999	4.79154	2.26049	yes	yes	0.372773	-0.428555
	SAPCD2	96.3764	72.7764	32.3447	36.2809	19990.6	20000.1	84.5764	34.3128	19995.3	2.46487	1.30151	yes	yes	0.251377	-0.599675
	SLC6A6	166.095	95.6875	40.0458	66.3863	20223.6	19744.8	130.892	53.216	19984.2	2.45963	1.29844	yes	yes	0.388685	-0.410403
	U2SURP	116.882	63.3424	31.8312	53.2634	19947.2	19999	90.1122	42.5473	19973.1	2.11793	1.08265	yes	yes	0.238145	-0.623159
	CEBPB	114.831	75.4719	14.3754	31.6493	19768.6	20130.5	95.1516	23.0123	19949.5	4.13481	2.04782	yes	yes	0.361609	-0.441761
	TLK2	114.831	49.8653	23.1033	37.0528	19556.8	20307.6	82.3484	30.0781	19932.2	2.73782	1.45303	yes	yes	0.26224	-0.5813
	SF3B4	176.348	92.9921	43.1262	58.6669	19929.3	19916.5	134.67	50.8966	19922.9	2.64596	1.40379	yes	yes	0.420489	-0.376245
	AHCYL1	196.854	83.5581	39.019	44.7721	19810.3	20002.3	140.206	41.8955	19906.3	3.34656	1.74268	yes	yes	0.493867	-0.30639
	NOTCH3	120.983	72.7764	42.6128	37.0528	20361.3	19395	96.8798	39.8328	19878.2	2.43216	1.28224	yes	yes	0.286983	-0.542143
	PLXNA1	131.236	55.2562	30.8044	24.7019	20365.6	19371.1	93.2461	27.7532	19868.3	3.35984	1.74839	yes	yes	0.329635	-0.481967
	SEPTIN7	168.146	74.1241	35.9385	43.2283	19215.8	20488	121.135	39.5834	19851.9	3.06025	1.61365	yes	yes	0.410801	-0.386369
	HIF1A	151.742	88.949	39.019	40.1405	19696.3	19998	120.345	39.5797	19847.1	3.04058	1.60435	yes	yes	0.406938	-0.390472
	PFDN4	108.68	74.1241	26.1838	30.8773	19226.9	20457.5	91.4019	28.5306	19842.2	3.20365	1.67972	yes	yes	0.316857	-0.499137
	SRSF11	166.095	106.469	68.2832	61.7547	19644.4	20031.6	136.282	65.0189	19838	2.09604	1.06767	yes	yes	0.359226	-0.444632
	NPEPPS	139.438	72.7764	34.9117	45.5441	19715.9	19904.5	106.107	40.2279	19810.2	2.63766	1.39926	yes	yes	0.332553	-0.478139
	PGD	365	315.365	145.294	133.544	19465.8	20139.2	340.182	139.419	19802.5	2.43999	1.28688	yes	yes	1.01383	0.00596308	yes
	SNX17	98.427	97.0352	30.291	50.1757	19606.2	19989.3	97.7311	40.2333	19797.7	2.42911	1.28043	yes	yes	0.290426	-0.536964
	BRD4	147.64	60.647	28.2374	32.4212	20207.4	19379.7	104.144	30.3293	19793.6	3.43377	1.77979	yes	yes	0.372921	-0.428383
	CPSF6	151.742	90.2967	35.9385	43.2283	19650.4	19908.9	121.019	39.5834	19779.6	3.05732	1.61227	yes	yes	0.411715	-0.385403
	CDC42	153.792	105.122	51.3407	71.7898	19259.2	20297.8	129.457	61.5653	19778.5	2.10276	1.07228	yes	yes	0.343259	-0.464378
	CALM3	131.236	97.0352	29.2642	53.2634	19432.7	20115.3	114.136	41.2638	19774	2.766	1.4678	yes	yes	0.368524	-0.433535
	MGRN1	153.792	66.0379	22.5899	33.9651	19950.6	19597	109.915	28.2775	19773.8	3.88701	1.95866	yes	yes	0.412857	-0.384201
	IDH2	100.478	90.2967	26.6972	29.3335	19743.9	19743.7	95.3871	28.0153	19743.8	3.40482	1.76758	yes	yes	0.34123	-0.466953
	LETMD1	65.618	40.4313	11.8084	16.9825	19760.9	19690.5	53.0247	14.3954	19725.7	3.68343	1.88105	yes	yes	0.195832	-0.708117
	SGPL1	102.528	52.5608	21.5631	27.0177	19442.9	19982.7	77.5444	24.2904	19712.8	3.19239	1.67464	yes	yes	0.270149	-0.568396
	KIAA0319L	102.528	53.9085	16.429	23.9299	19670.8	19724.2	78.2183	20.1795	19697.5	3.87613	1.95462	yes	yes	0.294651	-0.530692
	WDR26	200.955	72.7764	52.3675	49.4037	19439.5	19949.1	136.866	50.8856	19694.3	2.68967	1.42743	yes	yes	0.436574	-0.359942
	COX7C	135.337	90.2967	42.6128	48.6318	19479.4	19908.9	112.817	45.6223	19694.1	2.47284	1.30617	yes	yes	0.341191	-0.467003
	PAK4	94.3258	70.081	36.9653	28.5615	19595.1	19737.2	82.2034	32.7634	19666.1	2.509	1.32711	yes	yes	0.251396	-0.599641
	BTG2	123.034	40.4313	15.4022	19.2983	19246.4	20081.6	81.7325	17.3503	19664	4.71073	2.23595	yes	yes	0.327411	-0.484906
	HSD17B4	108.68	68.7333	38.5055	24.7019	19150.3	20168.5	88.7065	31.6037	19659.4	2.80684	1.48895	yes	yes	0.29046	-0.536913
	ZC3H18	149.691	90.2967	30.291	46.316	19477.7	19816.5	119.994	38.3035	19647.1	3.13271	1.64741	yes	yes	0.415788	-0.381128
	HNRNPL	157.893	149.596	50.3139	79.5091	19550.9	19732.9	153.745	64.9115	19641.9	2.36853	1.24399	yes	yes	0.452264	-0.344608
	PSMB1	149.691	95.6875	43.1262	58.6669	19202.2	20063.1	122.689	50.8966	19632.7	2.41056	1.26937	yes	yes	0.36568	-0.436899
	ADIPOR2	114.831	63.3424	35.4251	43.2283	19188.6	20075.1	89.0869	39.3267	19631.8	2.26531	1.17971	yes	yes	0.253467	-0.596078
	RAPGEF1	125.084	70.081	23.6167	31.6493	19468.4	19758.9	97.5826	27.633	19613.7	3.53138	1.82023	yes	yes	0.356637	-0.447773
	SPPL2A	149.691	55.2562	30.291	39.3686	19344.2	19878.4	102.474	34.8298	19611.3	2.94212	1.55686	yes	yes	0.344922	-0.462279
	EIF3M	102.528	94.3398	39.019	51.7195	19159.7	20025.1	98.4339	45.3692	19592.4	2.16962	1.11744	yes	yes	0.270843	-0.567282
	DNAJC13	153.792	64.6902	21.5631	26.2457	19459	19700.3	109.241	23.9044	19579.6	4.56991	2.19217	yes	yes	0.435844	-0.360669
	PPP1R15B	129.185	60.647	34.9117	40.9125	19391	19752.4	94.9162	37.9121	19571.7	2.50359	1.324	yes	yes	0.291258	-0.535722
	METAP2	155.843	102.426	46.7201	69.474	19141	19999	129.134	58.097	19570	2.22274	1.15234	yes	yes	0.362991	-0.440104
	BMPR2	127.135	49.8653	27.2106	30.8773	19721.8	19396	88.5001	29.044	19558.9	3.04711	1.60744	yes	yes	0.303985	-0.517148
	SRRT	127.135	109.165	45.6932	37.8247	19892.8	19213.5	118.15	41.759	19553.1	2.82932	1.50046	yes	yes	0.390683	-0.408176
	GSR	192.753	118.599	61.0955	61.7547	19085.7	20012.1	155.676	61.4251	19548.9	2.5344	1.34164	yes	yes	0.482128	-0.316838
	HACD3	176.348	79.515	46.2067	37.8247	19186	19900.2	127.932	42.0157	19543.1	3.04485	1.60637	yes	yes	0.439623	-0.35692
	IARS2	143.539	103.774	36.9653	55.5792	19323.8	19751.3	123.657	46.2723	19537.6	2.67237	1.41812	yes	yes	0.39608	-0.402218
	ETF1	268.624	229.111	93.9535	118.878	19081.4	19974.1	248.867	106.416	19527.7	2.33863	1.22567	yes	yes	0.729483	-0.136985
	SLC7A6	131.236	97.0352	30.8044	44.7721	19324.7	19713.3	114.136	37.7883	19519	3.0204	1.59474	yes	yes	0.391144	-0.407663
	SGSM2	131.236	51.213	20.0229	22.3861	20067.9	18952.8	91.2245	21.2045	19510.3	4.30213	2.10505	yes	yes	0.358887	-0.445043
	NUFIP2	147.64	71.4287	39.019	41.6844	19391.8	19624.2	109.535	40.3517	19508	2.7145	1.44069	yes	yes	0.354638	-0.450214
	RALY	145.59	66.0379	41.0726	41.6844	19152.9	19860	105.814	41.3785	19506.4	2.55722	1.35458	yes	yes	0.330329	-0.481053
	SPINT1	79.9719	37.7359	23.1033	29.3335	19374.8	19637.2	58.8539	26.2184	19506	2.24476	1.16656	yes	yes	0.16731	-0.776479
	EIF5	801.77	865.231	434.343	419.932	19217.5	19775.2	833.5	427.137	19496.4	1.95136	0.964483	yes	yes	2.0843
	HLTF	129.185	40.4313	23.1033	31.6493	19070.4	19920.8	84.8084	27.3763	19495.6	3.09788	1.63128	yes	yes	0.29459	-0.530782
	MXD4	88.1741	49.8653	12.3218	19.2983	19343.4	19618.8	69.0197	15.8101	19481.1	4.36556	2.12617	yes	yes	0.273135	-0.563622
	XPO5	145.59	72.7764	36.4519	34.737	19453.1	19478.6	109.183	35.5945	19465.8	3.06742	1.61703	yes	yes	0.37804	-0.422462
	COX7A2L	100.478	51.213	25.157	31.6493	19036.4	19893.7	75.8453	28.4031	19465	2.67032	1.41701	yes	yes	0.243731	-0.61309
	HSF1	118.933	78.1673	25.157	37.8247	19668.2	19243.9	98.5499	31.4908	19456.1	3.12948	1.64592	yes	yes	0.344669	-0.462598
	PTBP3	157.893	82.2104	32.3447	44.7721	19106.1	19787.2	120.052	38.5584	19446.6	3.11351	1.63854	yes	yes	0.419062	-0.377722
	M6PR	149.691	59.2993	40.5592	42.4563	19032.1	19793.7	104.495	41.5078	19412.9	2.51749	1.33198	yes	yes	0.324462	-0.488837
	GRSF1	118.933	75.4719	33.3715	34.737	19106.1	19673.1	97.2022	34.0542	19389.6	2.85434	1.51315	yes	yes	0.32568	-0.487209
	PPA1	133.286	95.6875	47.2335	56.3511	18879.9	19864.3	114.487	51.7923	19372.1	2.2105	1.14437	yes	yes	0.323634	-0.489946
	SERINC3	151.742	48.5176	33.3715	30.8773	19121.4	19606.8	100.13	32.1244	19364.1	3.11693	1.64013	yes	yes	0.351192	-0.454455
	CXXC5	137.388	64.6902	30.291	33.9651	19419.1	19291.7	101.039	32.128	19355.4	3.14488	1.65301	yes	yes	0.356029	-0.448514
	SNRPD2	141.489	98.3829	47.7469	54.8073	19100.1	19547.1	119.936	51.2771	19323.6	2.33898	1.22588	yes	yes	0.35531	-0.449392
	CAD	120.983	102.426	39.5324	40.9125	20026.3	18592	111.705	40.2224	19309.2	2.77717	1.47362	yes	yes	0.370198	-0.431565
	PERP	120.983	84.9058	33.3715	35.5089	18993	19623.1	102.944	34.4402	19308	2.98908	1.5797	yes	yes	0.354796	-0.450021
	DIDO1	120.983	53.9085	31.8312	30.1054	19487.1	19108.1	87.4458	30.9683	19297.6	2.82372	1.4976	yes	yes	0.292666	-0.533628
	DLST	153.792	87.6013	26.1838	33.1931	19130.8	19431.9	120.697	29.6885	19281.3	4.06544	2.02341	yes	yes	0.472002	-0.326056
	MAPK1	139.438	68.7333	34.9117	33.1931	18997.2	19560.1	104.086	34.0524	19278.7	3.05663	1.61194	yes	yes	0.363269	-0.439772
	CMTR1	116.882	57.9516	23.1033	31.6493	19221.8	19328.7	87.4168	27.3763	19275.2	3.19316	1.67498	yes	yes	0.311491	-0.506555
	TNS3	161.994	111.86	51.3407	50.1757	19612.1	18874.5	136.927	50.7582	19243.3	2.69764	1.4317	yes	yes	0.447787	-0.348929
	MT-ATP8	291.18	196.766	166.857	200.703	19102.7	19347.1	243.973	183.78	19224.9	1.32753	0.408741	yes	yes	0.313098
	C3orf14	129.185	57.9516	25.157	18.5264	18617.9	19814.3	93.5685	21.8417	19216.1	4.28394	2.09894	yes	yes	0.373263	-0.427985
	LAMTOR1	137.388	97.0352	29.7776	43.2283	18994.7	19433	117.211	36.5029	19213.8	3.21101	1.68303	yes	yes	0.420054	-0.376695
	RTN4	153.792	115.903	58.5284	72.5617	18995.5	19429.7	134.848	65.5451	19212.6	2.05733	1.04077	yes	yes	0.360714	-0.442837
	TWF1	164.045	68.7333	33.3715	39.3686	18498.9	19914.3	116.389	36.37	19206.6	3.20014	1.67813	yes	yes	0.416623	-0.380257
	FUBP1	164.045	113.208	45.1798	73.3337	18890.1	19487.3	138.626	59.2568	19188.7	2.33942	1.22615	yes	yes	0.413627	-0.383391
	PPP1R14B	114.831	63.3424	37.9921	40.9125	18914.7	19435.2	89.0869	39.4523	19174.9	2.25809	1.1751	yes	yes	0.258852	-0.586949
	SELENBP1	104.579	21.5634	16.429	13.8948	19207.3	19132	63.071	15.1619	19169.7	4.15983	2.05653	yes	yes	0.249921	-0.602196
	SUMO2	159.944	75.4719	51.8541	45.5441	18470	19856.7	117.708	48.6991	19163.3	2.41704	1.27324	yes	yes	0.360108	-0.443567
	NCOR1	131.236	78.1673	52.3675	43.2283	19470.1	18833.2	104.702	47.7979	19151.7	2.19051	1.13126	yes	yes	0.297122	-0.527066
	DGCR2	100.478	71.4287	27.2106	30.1054	19197.9	19097.3	85.9531	28.658	19147.6	2.99927	1.58461	yes	yes	0.299229	-0.523997
	UBXN1	125.084	35.0405	20.5363	28.5615	18989.6	19301.5	80.0624	24.5489	19145.5	3.26134	1.70547	yes	yes	0.289955	-0.537669
	PAN2	127.135	49.8653	20.0229	21.6141	19414	18861.5	88.5001	20.8185	19137.7	4.25103	2.08781	yes	yes	0.353655	-0.45142
	RAD23A	168.146	55.2562	31.3178	41.6844	18814.4	19440.6	111.701	36.5011	19127.5	3.06021	1.61363	yes	yes	0.393151	-0.40544
	ZNF512B	98.427	44.4745	24.1301	27.7896	19414.8	18826.7	71.4507	25.9599	19120.8	2.75235	1.46067	yes	yes	0.237913	-0.623581
	TRPS1	110.73	68.7333	39.5324	40.1405	19465	18769.1	89.7318	39.8364	19117.1	2.25251	1.17153	yes	yes	0.260999	-0.583361
	CCDC170	108.68	41.7791	18.9961	20.8422	18815.2	19337.4	75.2294	19.9191	19076.3	3.77674	1.91714	yes	yes	0.289942	-0.537688
	CPSF7	131.236	70.081	29.7776	51.7195	19095	19051.6	100.658	40.7486	19073.3	2.47023	1.30465	yes	yes	0.314103	-0.502928
	ARPC5	155.843	80.8627	39.019	39.3686	18668.1	19462.3	118.353	39.1938	19065.2	3.01968	1.5944	yes	yes	0.415201	-0.381742
	ADAM15	116.882	68.7333	32.8581	40.9125	19180.1	18922.3	92.8076	36.8853	19051.2	2.51612	1.3312	yes	yes	0.293537	-0.532337
	KDM1A	120.983	68.7333	33.3715	42.4563	18710.6	19384.1	94.8582	37.9139	19047.4	2.50194	1.32305	yes	yes	0.298962	-0.524384
	SHISA5	102.528	71.4287	27.2106	44.7721	18998.9	19074.4	86.9784	35.9914	19036.7	2.41665	1.27301	yes	yes	0.267836	-0.572132
	TCP1	196.854	148.248	52.3675	68.7021	18691.1	19313.5	172.551	60.5348	19002.3	2.85044	1.51119	yes	yes	0.589489	-0.229524
	TAF1C	100.478	39.0836	15.4022	30.8773	19681	18321.5	69.7806	23.1398	19001.2	3.01561	1.59245	yes	yes	0.245462	-0.610016
	KLHDC3	86.1236	56.6039	24.1301	23.9299	18913.9	19086.4	71.3637	24.03	19000.1	2.96977	1.57035	yes	yes	0.249123	-0.603586
	SUMF2	75.8708	36.3882	22.0765	18.5264	18821.2	19177.7	56.1295	20.3015	18999.4	2.7648	1.46718	yes	yes	0.188574	-0.724517
	XPO6	166.095	103.774	45.6932	51.7195	19029.6	18959.3	134.935	48.7064	18994.4	2.77037	1.47008	yes	yes	0.453966	-0.342976
	CSE1L	178.399	121.294	55.9614	60.9827	18890.9	19095.1	149.846	58.4721	18993	2.5627	1.35767	yes	yes	0.481095	-0.317769
	KLHL36	71.7697	37.7359	20.0229	29.3335	19025.3	18958.2	54.7528	24.6782	18991.7	2.21867	1.1497	yes	yes	0.158356	-0.800365
	NDUFB10	155.843	71.4287	33.3715	49.4037	18683.4	19296.1	113.636	41.3876	18989.8	2.74565	1.45715	yes	yes	0.380458	-0.419693
	SEC16A	125.084	74.1241	32.8581	33.1931	19745.6	18232.4	99.6042	33.0256	18989	3.01597	1.59262	yes	yes	0.350616	-0.455168
	SRSF6	174.298	80.8627	63.6625	50.9476	18828	19141.8	127.58	57.305	18984.9	2.22633	1.15467	yes	yes	0.370164	-0.431606
	CDK16	116.882	79.515	16.9424	43.2283	19017.6	18893	98.1985	30.0854	18955.3	3.264	1.70664	yes	yes	0.359335	-0.4445
	TLE3	102.528	40.4313	15.9156	29.3335	19094.2	18789.8	71.4797	22.6245	18942	3.15939	1.65965	yes	yes	0.25792	-0.588515
	ISG15	22.5562	6.73856	4.10726	8.49127	18912.2	18968	14.6474	6.29926	18940.1	2.32525	1.21739	no	yes	0.0440764
	GMPS	155.843	83.5581	27.724	49.4037	18542.2	19329.8	119.7	38.5639	18936	3.10395	1.63411	yes	yes	0.428478	-0.368072
	PARK7	149.691	106.469	46.2067	62.5266	18489.5	19376.5	128.08	54.3666	18933	2.35586	1.23625	yes	yes	0.389339	-0.409673
	HIPK2	100.478	86.2535	24.6435	39.3686	19392.7	18433.4	93.3655	32.0061	18913	2.91712	1.54454	yes	yes	0.324429	-0.48888
	SPRYD3	120.983	47.1699	25.6704	40.1405	18631.5	19121.2	84.0765	32.9054	18876.4	2.55509	1.35338	yes	yes	0.271086	-0.566894
	PSMA5	151.742	97.0352	44.6664	63.2985	18459.8	19275.4	124.388	53.9825	18867.6	2.30424	1.20429	yes	yes	0.373158	-0.428107
	SBNO1	137.388	78.1673	30.291	32.4212	18756.6	18947.3	107.777	31.3561	18851.9	3.43721	1.78124	yes	yes	0.405377	-0.392141
	DCTN2	141.489	75.4719	35.9385	45.5441	18750.6	18927.8	108.48	40.7413	18839.2	2.66266	1.41287	yes	yes	0.359564	-0.444223
	TIAL1	155.843	146.901	57.5016	79.5091	18661.3	19009.2	151.372	68.5054	18835.3	2.20963	1.14381	yes	yes	0.439952	-0.356594
	ROBO1	123.034	82.2104	33.3715	37.8247	18901.1	18744.1	102.622	35.5981	18822.6	2.8828	1.52747	yes	yes	0.356082	-0.448451
	MCM3AP	125.084	59.2993	34.9117	39.3686	18887.5	18686.6	92.1918	37.1401	18787	2.48227	1.31166	yes	yes	0.29303	-0.533088
	H3-3A	143.539	97.0352	34.3983	46.316	18688.5	18865.8	120.287	40.3571	18777.2	2.98057	1.57559	yes	yes	0.425677	-0.37092
	TBC1D5	104.579	44.4745	14.8888	23.9299	18616.2	18888.6	74.5266	19.4094	18752.4	3.83972	1.941	yes	yes	0.29392	-0.531771
	HTT	108.68	60.647	28.2374	37.8247	19337.4	18145.5	84.6634	33.0311	18741.5	2.56314	1.35791	yes	yes	0.275498	-0.559881
	PPP4R3A	96.3764	84.9058	33.8849	33.9651	18428.3	19046.2	90.6411	33.925	18737.2	2.67181	1.41782	yes	yes	0.302692	-0.518999
	PTPRJ	125.084	57.9516	24.6435	31.6493	18840.8	18604	91.5179	28.1464	18722.4	3.2515	1.7011	yes	yes	0.33848	-0.470467
	FNBP4	116.882	60.647	24.1301	24.7019	18613.7	18790.9	88.7645	24.416	18702.3	3.63551	1.86216	yes	yes	0.344068	-0.463356
	SART1	92.2753	70.081	26.1838	32.4212	18270.1	19122.2	81.1781	29.3025	18696.2	2.77035	1.47007	yes	yes	0.277467	-0.556789
	LRRC59	176.348	141.51	88.8195	88.0004	18454.7	18903.9	158.929	88.4099	18679.3	1.79764	0.846102	yes	yes	0.377526
	TAF15	186.601	134.771	61.0955	94.1759	17971.6	19328.7	160.686	77.6357	18650.1	2.06975	1.04945	yes	yes	0.445308	-0.35134
	ULK1	88.1741	52.5608	18.4827	22.3861	19160.5	18107.5	70.3674	20.4344	18634	3.44358	1.78391	yes	yes	0.267968	-0.571917
	CXCL12	65.618	25.6065	15.9156	18.5264	18592.4	18656.1	45.6122	17.221	18624.3	2.64864	1.40525	yes	yes	0.152442	-0.816895
	PCF11	131.236	48.5176	31.8312	31.6493	18555.9	18655.1	89.8768	31.7403	18605.5	2.83163	1.50163	yes	yes	0.31247	-0.505191
	ELOB	108.68	86.2535	29.2642	39.3686	18450.4	18736.5	97.4667	34.3164	18593.5	2.84023	1.50601	yes	yes	0.339637	-0.468985
	MATN2	96.3764	49.8653	16.9424	23.9299	18470.8	18707.2	73.1209	20.4362	18589	3.57801	1.83916	yes	yes	0.283418	-0.547572
	UBQLN1	147.64	102.426	39.019	60.2108	18106	19048.4	125.033	49.6149	18577.2	2.52008	1.33347	yes	yes	0.405974	-0.391502
	TMEM183A	133.286	78.1673	29.2642	31.6493	18401.1	18745.2	105.727	30.4567	18573.2	3.47138	1.79551	yes	yes	0.405263	-0.392263
	NDUFS2	104.579	66.0379	27.2106	37.0528	18094.1	19033.2	85.3083	32.1317	18563.6	2.65496	1.40869	yes	yes	0.286456	-0.542942
	ENAH	131.236	90.2967	38.5055	40.9125	18173.2	18904.9	110.766	39.709	18539	2.78945	1.47998	yes	yes	0.383285	-0.416479
	IL13RA1	114.831	66.0379	31.3178	40.1405	18069.4	18994	90.4347	35.7292	18531.7	2.53111	1.33977	yes	yes	0.295199	-0.529885
	PPP1R3C	106.629	39.0836	13.862	12.3509	17958.8	19032.1	72.8564	13.1065	18495.5	5.55882	2.47478	yes	yes	0.323052	-0.490727
	SLC7A2	110.73	48.5176	14.8888	20.0703	18284.6	18690.9	79.624	17.4795	18487.7	4.55527	2.18754	yes	yes	0.336139	-0.473481
	NRBP1	133.286	87.6013	29.7776	43.2283	18305	18657.2	110.444	36.5029	18481.1	3.02562	1.59723	yes	yes	0.400089	-0.397843
	HDAC2	114.831	94.3398	41.0726	60.2108	18004.8	18932.1	104.586	50.6417	18468.4	2.06521	1.04629	yes	yes	0.292087	-0.534487
	GDE1	147.64	75.4719	29.2642	33.1931	18063.4	18850.6	111.556	31.2287	18457	3.57223	1.83683	yes	yes	0.435213	-0.361298
	EPHB4	106.629	49.8653	26.6972	27.7896	18686	18219.4	78.2473	27.2434	18452.7	2.87216	1.52213	yes	yes	0.276404	-0.558456
	SPTBN2	94.3258	56.6039	27.724	37.8247	18934.3	17961.9	75.4649	32.7744	18448.1	2.30256	1.20324	yes	yes	0.231409	-0.63562
	LTBR	102.528	57.9516	23.1033	31.6493	18535.4	18321.5	80.2398	27.3763	18428.5	2.931	1.55139	yes	yes	0.286858	-0.542333
	AFG3L2	112.781	90.2967	28.2374	47.8599	18042.2	18789.8	101.539	38.0486	18416	2.66866	1.41611	yes	yes	0.344756	-0.462489
	SRP9	151.742	66.0379	30.291	38.5967	17838.1	18960.4	108.89	34.4438	18399.2	3.16137	1.66055	yes	yes	0.404614	-0.392959
	GPR107	108.68	56.6039	20.5363	31.6493	18242	18541	82.6418	26.0928	18391.5	3.16723	1.66322	yes	yes	0.307474	-0.512192
	FAM199X	155.843	78.1673	27.2106	32.4212	18026.9	18731.1	117.005	29.8159	18379	3.92425	1.97242	yes	yes	0.474395	-0.32386
	GPT2	114.831	48.5176	15.4022	18.5264	18552.5	18205.2	81.6745	16.9643	18378.8	4.81449	2.26738	yes	yes	0.352091	-0.453345
	PHIP	116.882	51.213	23.1033	32.4212	18634.1	18121.6	84.0475	27.7623	18377.8	3.0274	1.59808	yes	yes	0.306267	-0.5139
	COPZ1	155.843	74.1241	35.9385	55.5792	18208.9	18534.5	114.983	45.7589	18371.7	2.51281	1.3293	yes	yes	0.376801	-0.423888
	NPLOC4	161.994	87.6013	36.4519	44.7721	18588.2	18153.1	124.798	40.612	18370.6	3.07293	1.61961	yes	yes	0.458263	-0.338885
	PUF60	147.64	87.6013	52.3675	57.895	18413	18312.8	117.621	55.1313	18362.9	2.13347	1.0932	yes	yes	0.340304	-0.468134
	PARP1	123.034	79.515	45.6932	50.9476	18111.9	18607.2	101.274	48.3204	18359.6	2.09589	1.06756	yes	yes	0.288427	-0.539965
	UBE4A	147.64	72.7764	27.2106	27.0177	18175.7	18488.8	110.208	27.1141	18332.3	4.06461	2.02312	yes	yes	0.453268	-0.343645
	G3BP2	153.792	72.7764	43.6396	44.7721	17908.7	18747.4	113.284	44.2059	18328	2.56265	1.35764	yes	yes	0.3769	-0.423774
	DERL1	108.68	94.3398	36.4519	41.6844	17851.7	18786.5	101.51	39.0682	18319.1	2.59827	1.37755	yes	yes	0.340855	-0.46743
	PES1	125.084	84.9058	47.2335	50.9476	18201.2	18435.6	104.995	49.0905	18318.4	2.1388	1.0968	yes	yes	0.305182	-0.515441
	ZC3H14	133.286	68.7333	24.6435	27.0177	18015	18612.7	101.01	25.8306	18313.8	3.91047	1.96734	yes	yes	0.410506	-0.386681
	SLC35B2	131.236	92.9921	31.8312	34.737	18259.9	18340	112.114	33.2841	18299.9	3.36839	1.75206	yes	yes	0.430766	-0.365759
	CEP350	137.388	68.7333	18.9961	30.8773	18489.5	18069.4	103.06	24.9367	18279.5	4.13288	2.04715	yes	yes	0.427385	-0.369181
	PNISR	110.73	37.7359	17.9693	17.7545	18063.4	18467.1	74.2331	17.8619	18265.3	4.15596	2.05518	yes	yes	0.308625	-0.510568
	SPIN1	108.68	66.0379	26.1838	34.737	17726.7	18746.3	87.3588	30.4604	18236.5	2.86795	1.52002	yes	yes	0.312003	-0.505841
	AKAP1	120.983	80.8627	35.4251	44.0002	18001.4	18466	100.923	39.7126	18233.7	2.54133	1.34558	yes	yes	0.335699	-0.47405
	NIPBL	164.045	98.3829	56.9882	76.4214	18452.9	18014	131.214	66.7048	18233.5	1.96708	0.976058	yes	yes	0.353795
	RNF130	106.629	64.6902	19.5095	27.7896	17935.9	18514.9	85.6597	23.6495	18225.4	3.62204	1.8568	yes	yes	0.34024	-0.468214
	IPO5	166.095	102.426	45.1798	66.3863	17991.2	18407.3	134.261	55.7831	18199.2	2.40684	1.26714	yes	yes	0.431214	-0.365307
	C16orf58	108.68	63.3424	18.9961	26.2457	18295.6	18091.2	86.0111	22.6209	18193.4	3.80228	1.92687	yes	yes	0.348424	-0.457891
	FYTTD1	108.68	41.7791	27.2106	33.1931	17817.7	18550.7	75.2294	30.2019	18184.2	2.49089	1.31666	yes	yes	0.247619	-0.606216
	ACSS1	86.1236	22.9111	11.8084	15.4387	18188.5	18167.2	54.5173	13.6235	18177.8	4.00171	2.00062	yes	yes	0.224965	-0.647885
	DCP2	92.2753	35.0405	18.9961	20.8422	18083.9	18266.1	63.6579	19.9191	18175	3.19582	1.67618	yes	yes	0.240654	-0.618607
	LARP4B	116.882	94.3398	33.3715	27.7896	18280.3	18062.9	105.611	30.5805	18171.6	3.45353	1.78807	yes	yes	0.412899	-0.384156
	UHRF1BP1	104.579	48.5176	17.9693	22.3861	18167.2	18175.9	76.5481	20.1777	18171.6	3.79371	1.92361	yes	yes	0.310213	-0.50834
	BTBD2	63.5674	43.1268	9.75474	24.7019	18087.3	18241.1	53.3471	17.2283	18164.2	3.09648	1.63063	yes	yes	0.198846	-0.701483
	PNMA1	110.73	84.9058	27.2106	45.5441	17912.9	18386.7	97.8181	36.3773	18149.8	2.68898	1.42706	yes	yes	0.33852	-0.470415
	TMEM259	110.73	51.213	20.0229	33.9651	18373.9	17901	80.9717	26.994	18137.4	2.99962	1.58478	yes	yes	0.297604	-0.526362
	COMT	94.3258	48.5176	21.0497	26.2457	18277.8	17981.4	71.4217	23.6477	18129.6	3.02024	1.59466	yes	yes	0.263514	-0.579196
	POLDIP2	110.73	95.6875	39.019	55.5792	17838.9	18382.3	103.209	47.2991	18110.6	2.18205	1.12568	yes	yes	0.308713	-0.510445
	ATP5F1C	155.843	84.9058	41.586	52.4915	17590.6	18604	120.374	47.0387	18097.3	2.55905	1.35561	yes	yes	0.405229	-0.392299
	PTOV1	108.68	70.081	20.0229	31.6493	18517.6	17650	89.3804	25.8361	18083.8	3.45952	1.79057	yes	yes	0.351388	-0.454213
	CD151	100.478	98.3829	29.7776	38.5967	18256.5	17906.5	99.4302	34.1871	18081.5	2.90841	1.54023	yes	yes	0.360828	-0.442699
	TUBGCP2	100.478	76.8196	26.6972	31.6493	17981	18091.2	88.6485	29.1732	18036.1	3.0387	1.60345	yes	yes	0.329758	-0.481805
	SND1	123.034	86.2535	32.8581	41.6844	17932.5	18130.3	104.644	37.2712	18031.4	2.80762	1.48935	yes	yes	0.37364	-0.427547
	SULF1	88.1741	32.3451	12.8352	7.71933	18071.9	17990.1	60.2596	10.2773	18031	5.86339	2.55174	yes	yes	0.277202	-0.557204
	ZCCHC14	118.933	53.9085	18.4827	30.1054	18111.9	17924.9	86.4205	24.294	18018.4	3.55727	1.83077	yes	yes	0.344794	-0.46244
	CARM1	108.68	74.1241	20.0229	29.3335	17979.3	18048.8	91.4019	24.6782	18014	3.70376	1.88899	yes	yes	0.370399	-0.43133
	PDPK1	133.286	53.9085	21.0497	40.9125	18083	17816.3	93.5975	30.9811	17949.6	3.02112	1.59508	yes	yes	0.348845	-0.457368
	ZHX1	153.792	99.7307	37.9921	54.0353	17416.3	18472.5	126.761	46.0137	17944.4	2.75486	1.46198	yes	yes	0.449988	-0.346799
	AXIN1	69.7191	45.8222	16.429	15.4387	17932.5	17931.4	57.7706	15.9338	17932	3.62566	1.85824	yes	yes	0.233308	-0.632069
	SREBF1	106.629	63.3424	30.291	43.2283	18174	17680.5	84.9858	36.7596	17927.2	2.31193	1.2091	yes	yes	0.269011	-0.570231
	ZNF703	104.579	36.3882	12.3218	16.9825	18058.3	17758.7	70.4834	14.6522	17908.5	4.81045	2.26617	yes	yes	0.311758	-0.506182
	HDAC7	120.983	52.5608	28.7508	21.6141	18152.7	17635.9	86.7719	25.1825	17894.3	3.44573	1.78481	yes	yes	0.344184	-0.463209
	GNPNAT1	135.337	72.7764	40.0458	38.5967	17480	18279.1	104.057	39.3212	17879.6	2.64633	1.40399	yes	yes	0.362064	-0.441215
	MCM4	192.753	132.076	68.7966	94.9478	17834.7	17907.5	162.414	81.8722	17871.1	1.98375	0.988233	yes	yes	0.450683
	LRATD1	100.478	43.1268	19.5095	20.0703	17924.8	17810.8	71.8021	19.7899	17867.8	3.62823	1.85926	yes	yes	0.291094	-0.535966
	GOLPH3	112.781	68.7333	28.7508	37.0528	17602.5	18104.2	90.7571	32.9018	17853.4	2.75842	1.46384	yes	yes	0.324058	-0.489377
	ESYT2	106.629	78.1673	22.0765	30.8773	17595.7	18107.5	92.3982	26.4769	17851.6	3.48977	1.80313	yes	yes	0.369274	-0.432651
	CHD2	102.528	68.7333	11.8084	26.2457	17933.3	17753.3	85.6307	19.027	17843.3	4.50047	2.17008	yes	yes	0.37327	-0.427977
	COL18A1	90.2247	72.7764	31.3178	44.7721	18209.7	17470.8	81.5006	38.045	17840.2	2.14222	1.0991	yes	yes	0.243582	-0.613355
	ASH1L	129.185	75.4719	17.4558	32.4212	18230.1	17450.1	102.329	24.9385	17840.1	4.10323	2.03676	yes	yes	0.433798	-0.362713
	PPM1H	98.427	59.2993	19.5095	30.8773	17677.3	17959.7	78.8631	25.1934	17818.5	3.13031	1.6463	yes	yes	0.301202	-0.521142
	AGPAT3	137.388	63.3424	21.0497	37.8247	17742	17880.4	100.365	29.4372	17811.2	3.40946	1.76954	yes	yes	0.398221	-0.399876
	DAG1	131.236	71.4287	22.0765	33.1931	17958	17644.6	101.332	27.6348	17801.3	3.66683	1.87454	yes	yes	0.414001	-0.382999
	SEMA3F	73.8202	44.4745	15.4022	26.2457	18279.5	17323	59.1473	20.824	17801.2	2.84035	1.50607	yes	yes	0.215285	-0.666986
	CCDC6	123.034	72.7764	17.9693	33.9651	17554.9	18032.5	97.9051	25.9672	17793.7	3.77034	1.9147	yes	yes	0.404289	-0.393308
	RAB14	108.68	87.6013	36.4519	30.8773	17514.1	18046.6	98.1405	33.6646	17780.3	2.91524	1.54362	yes	yes	0.362625	-0.440543
	SPTLC2	102.528	45.8222	22.5899	21.6141	17561.7	17917.3	74.1751	22.102	17739.5	3.35603	1.74676	yes	yes	0.293543	-0.532328
	TAGLN2	186.601	179.246	81.6318	100.351	17524.3	17946.7	182.923	90.9915	17735.5	2.01033	1.00744	yes	yes	0.51835	-0.285377
	MRFAP1L1	77.9213	40.4313	14.8888	14.6667	17166.2	18300.9	59.1763	14.7778	17733.5	4.00442	2.00159	yes	yes	0.250365	-0.601426
	FOXO3	92.2753	32.3451	16.429	16.2106	17561.7	17857.6	62.3102	16.3198	17709.6	3.81807	1.93284	yes	yes	0.259691	-0.585543
	ANKRD17	129.185	72.7764	31.3178	33.1931	18317.7	17079.6	100.981	32.2555	17698.7	3.13066	1.64647	yes	yes	0.388308	-0.410824
	GAK	94.3258	59.2993	15.9156	32.4212	18013.3	17377.3	76.8126	24.1684	17695.3	3.17822	1.66822	yes	yes	0.297504	-0.526508
	TAX1BP1	108.68	72.7764	35.4251	35.5089	17100.7	18284.6	90.7281	35.467	17692.7	2.5581	1.35507	yes	yes	0.312339	-0.505374
	PPP4R3B	123.034	51.213	24.1301	31.6493	17212.2	18166.1	87.1234	27.8897	17689.1	3.12385	1.64333	yes	yes	0.334859	-0.475138
	TRIB3	79.9719	48.5176	13.3486	22.3861	17632.3	17735.9	64.2448	17.8673	17684.1	3.59566	1.84625	yes	yes	0.262255	-0.581276
	ATP6V1C1	90.2247	70.081	25.157	37.8247	17450.3	17863	80.1529	31.4908	17656.6	2.54527	1.34782	yes	yes	0.275602	-0.559718
	CNDP2	104.579	68.7333	31.3178	41.6844	17517.5	17795.6	86.656	36.5011	17656.5	2.37406	1.24736	yes	yes	0.284058	-0.546593
	SEC62	104.579	78.1673	27.2106	44.7721	16923.8	18381.3	91.373	35.9914	17652.6	2.53875	1.34412	yes	yes	0.313731	-0.503442
	TMED9	153.792	75.4719	29.2642	42.4563	17526.8	17762	114.632	35.8603	17644.4	3.19663	1.67655	yes	yes	0.446441	-0.350236
	TAOK1	129.185	72.7764	33.3715	32.4212	17486	17793.5	100.981	32.8963	17639.7	3.06967	1.61808	yes	yes	0.385973	-0.413443
	VDAC2	139.438	109.165	53.9078	62.5266	17068.4	18209.6	124.301	58.2172	17639	2.13513	1.09433	yes	yes	0.374648	-0.426376
	SARAF	114.831	52.5608	22.0765	26.2457	17238.5	18033.6	83.6961	24.1611	17636	3.46408	1.79247	yes	yes	0.337576	-0.471629
	TERF2IP	141.489	67.3856	24.1301	37.0528	17168.8	18068.3	104.437	30.5915	17618.6	3.41393	1.77143	yes	yes	0.419136	-0.377645
	PTEN	116.882	68.7333	36.9653	26.2457	17281	17940.1	92.8076	31.6055	17610.6	2.93644	1.55407	yes	yes	0.34753	-0.459007
	KIAA0513	118.933	52.5608	23.6167	30.1054	17770	17401.2	85.7467	26.8611	17585.6	3.19223	1.67456	yes	yes	0.33485	-0.475149
	EPS8L2	59.4663	60.647	23.6167	29.3335	18046.4	17111.1	60.0567	26.4751	17578.8	2.26842	1.18169	yes	yes	0.191034	-0.718888
	PPFIA1	112.781	63.3424	21.5631	33.9651	17283.6	17850	88.0617	27.7641	17566.8	3.17178	1.66529	yes	yes	0.343248	-0.464392
	GPBP1L1	118.933	48.5176	13.3486	23.9299	17164.5	17922.8	83.7251	18.6393	17543.6	4.49187	2.16732	yes	yes	0.370994	-0.430633
	ZFAND3	133.286	71.4287	31.3178	37.0528	17213.9	17850	102.358	34.1853	17531.9	2.9942	1.58217	yes	yes	0.388847	-0.410221
	KHNYN	123.034	48.5176	14.3754	20.0703	17348.2	17697.9	85.7757	17.2228	17523	4.98034	2.31625	yes	yes	0.391215	-0.407584
	SLC6A14	110.73	37.7359	11.8084	20.8422	17257.2	17772.8	74.2331	16.3253	17515	4.54713	2.18496	yes	yes	0.330618	-0.480673
	GUCD1	82.0225	45.8222	17.9693	30.1054	17332.9	17692.4	63.9223	24.0373	17512.7	2.65929	1.41104	yes	yes	0.227749	-0.642543
	ZNF316	114.831	63.3424	20.5363	39.3686	17838.9	17183.9	89.0869	29.9524	17511.4	2.97428	1.57254	yes	yes	0.337691	-0.471481
	ZMIZ2	157.893	66.0379	21.5631	30.8773	17800.7	17181.8	111.966	26.2202	17491.2	4.2702	2.0943	yes	yes	0.490219	-0.309609
	TPD52L2	86.1236	67.3856	33.3715	30.8773	17436.7	17521.8	76.7546	32.1244	17479.3	2.38929	1.25658	yes	yes	0.255332	-0.592894
	USF2	88.1741	55.2562	29.7776	32.4212	17415.4	17542.5	71.7152	31.0994	17478.9	2.306	1.20539	yes	yes	0.23237	-0.633821
	WIZ	114.831	52.5608	21.5631	31.6493	17595.7	17356.7	83.6961	26.6062	17476.2	3.14574	1.6534	yes	yes	0.326672	-0.485888
	RACGAP1	102.528	59.2993	29.7776	30.1054	17104.1	17846.7	80.9137	29.9415	17475.4	2.70239	1.43424	yes	yes	0.291679	-0.535094
	PRPF40A	125.084	79.515	36.4519	38.5967	17117.8	17832.6	102.3	37.5243	17475.2	2.72622	1.4469	yes	yes	0.370671	-0.431012
	CD2BP2	88.1741	90.2967	37.4787	44.7721	17275.9	17664.2	89.2354	41.1254	17470.1	2.16984	1.11759	yes	yes	0.275385	-0.560059
	SLC11A2	129.185	26.9542	17.4558	21.6141	17400.1	17511	78.0698	19.535	17455.5	3.99641	1.9987	yes	yes	0.335337	-0.474519
	PPP2R5E	125.084	57.9516	24.1301	37.8247	17237.7	17662	91.5179	30.9774	17449.8	2.95434	1.56284	yes	yes	0.34694	-0.459745
	IRS1	112.781	68.7333	18.9961	31.6493	17470.7	17406.7	90.7571	25.3227	17438.7	3.58403	1.84158	yes	yes	0.375226	-0.425707
	TMEM59	114.831	41.7791	22.5899	21.6141	17094.8	17775	78.3053	22.102	17434.9	3.5429	1.82493	yes	yes	0.322361	-0.491658
	PGAP6	84.073	82.2104	38.5055	39.3686	17549.8	17268.7	83.1417	38.9371	17409.2	2.13528	1.09443	yes	yes	0.253915	-0.595312
	RHPN1	79.9719	60.647	16.9424	33.1931	18300.7	16490.8	70.3095	25.0678	17395.7	2.80477	1.48788	yes	yes	0.260073	-0.584904
	FMR1	332.191	314.017	168.911	177.545	17065	17703.3	323.104	173.228	17384.2	1.8652	0.899327	yes	yes	0.862142
	PNRC1	59.4663	37.7359	12.8352	9.2632	16900.9	17867.3	48.6011	11.0492	17384.1	4.39861	2.13705	yes	yes	0.216013	-0.665521
	AMD1	237.865	177.898	69.8234	84.9127	17102.4	17664.2	207.882	77.368	17383.3	2.68692	1.42595	yes	yes	0.750798	-0.124477
	DDB2	110.73	43.1268	15.9156	27.7896	17299.7	17466.4	76.9285	21.8526	17383.1	3.52034	1.81571	yes	yes	0.316836	-0.499165
	RPL36AL	118.933	72.7764	33.3715	46.316	16982.5	17768.5	95.8545	39.8437	17375.5	2.40576	1.26649	yes	yes	0.322355	-0.491666
	DDX46	104.579	107.817	49.8005	39.3686	16997.8	17745.7	106.198	44.5846	17371.7	2.38194	1.25214	yes	yes	0.354675	-0.45017
	AIFM1	102.528	70.081	26.6972	40.9125	17034.4	17691.3	86.3045	33.8048	17362.9	2.55302	1.35221	yes	yes	0.302368	-0.519465
	HACD2	94.3258	49.8653	23.1033	35.5089	17099.9	17625.1	72.0956	29.3061	17362.5	2.46009	1.29871	yes	yes	0.246448	-0.608275
	PRPF3	116.882	66.0379	29.2642	28.5615	17216.4	17405.6	91.4599	28.9129	17311	3.16329	1.66143	yes	yes	0.361314	-0.442115
	PSMC1	170.197	128.033	48.7737	54.0353	16864.3	17738.1	149.115	51.4045	17301.2	2.90081	1.53645	yes	yes	0.56476	-0.248136
	OLA1	145.59	78.1673	34.3983	35.5089	16953.6	17619.6	111.879	34.9536	17286.6	3.20077	1.67842	yes	yes	0.444997	-0.351643
	HERC1	112.781	48.5176	22.0765	30.8773	18207.2	16337.6	80.6493	26.4769	17272.4	3.04602	1.60693	yes	yes	0.313636	-0.503574
	MECP2	108.68	49.8653	31.8312	30.1054	17132.2	17379.5	79.2725	30.9683	17255.9	2.55979	1.35603	yes	yes	0.279929	-0.552952
	MAP4K4	155.843	91.6444	33.8849	28.5615	17122	17387.1	123.744	31.2232	17254.6	3.96319	1.98666	yes	yes	0.536208	-0.270667
	NOP14	120.983	51.213	29.7776	41.6844	16937.5	17549	86.0981	35.731	17243.2	2.40962	1.2688	yes	yes	0.292098	-0.534472
	RBCK1	100.478	49.8653	20.5363	27.7896	17156.9	17303.5	75.1714	24.1629	17230.2	3.11102	1.63739	yes	yes	0.296042	-0.528647
	CENPF	106.629	68.7333	36.9653	34.737	17639.1	16817.8	87.6812	35.8512	17228.4	2.4457	1.29025	yes	yes	0.30084	-0.521664
	NARS1	116.882	71.4287	31.8312	49.4037	16975.7	17453.4	94.1554	40.6175	17214.6	2.3181	1.21294	yes	yes	0.311003	-0.507235
	ZNF740	104.579	48.5176	17.4558	27.0177	16982.5	17433.8	76.5481	22.2368	17208.2	3.44241	1.78342	yes	yes	0.315614	-0.500844
	GRK2	131.236	48.5176	27.2106	30.8773	17313.4	17079.6	89.8768	29.044	17196.5	3.09451	1.62971	yes	yes	0.353751	-0.451302
	SOX12	67.6685	68.7333	18.4827	24.7019	16992.7	17393.6	68.2009	21.5923	17193.2	3.15858	1.65928	yes	yes	0.271088	-0.56689
	ESD	147.64	63.3424	27.724	27.7896	16935.8	17448	105.491	27.7568	17191.9	3.80056	1.92621	yes	yes	0.45216	-0.344708
	LMAN2	100.478	55.2562	29.2642	37.0528	17173	17208.9	77.8668	33.1585	17191	2.34832	1.23163	yes	yes	0.260069	-0.584912
	MAN1A2	123.034	56.6039	26.1838	30.1054	16850.7	17527.3	89.8188	28.1446	17189	3.19133	1.67416	yes	yes	0.358801	-0.445147
	SCYL1	116.882	51.213	26.6972	27.7896	17266.6	17098.1	84.0475	27.2434	17182.3	3.08506	1.6253	yes	yes	0.330596	-0.480702
	SBF1	106.629	39.0836	28.2374	29.3335	17344.8	17007.9	72.8564	28.7854	17176.4	2.53102	1.33972	yes	yes	0.256579	-0.590779
	PRPF38B	176.348	61.9947	27.724	35.5089	16923	17421.9	119.172	31.6165	17172.4	3.76929	1.91429	yes	yes	0.509858	-0.292551
	NUBP2	51.264	41.7791	9.75474	20.0703	17288.7	17022.1	46.5215	14.9125	17155.4	3.11963	1.64138	yes	yes	0.184252	-0.734589
	MCM3	176.348	106.469	58.015	71.0179	17118.6	17163.3	141.409	64.5164	17141	2.19183	1.13213	yes	yes	0.448588	-0.348152
	SIPA1L1	112.781	55.2562	19.5095	21.6141	16947.7	17333.9	84.0185	20.5618	17140.8	4.08615	2.03074	yes	yes	0.370209	-0.431553
	SUGP2	108.68	51.213	25.157	33.9651	17423.1	16849.3	79.9464	29.561	17136.2	2.70445	1.43534	yes	yes	0.294029	-0.531609
	SSB	110.73	86.2535	44.153	47.8599	16621.1	17651.1	98.4919	46.0064	17136.1	2.14083	1.09817	yes	yes	0.306286	-0.513873
	TRA2B	176.348	150.944	82.1452	82.5969	16901.7	17366.5	163.646	82.371	17134.1	1.98669	0.99037	yes	yes	0.474346
	TOM1L1	102.528	48.5176	17.9693	20.0703	16732.5	17483.8	75.5228	19.0198	17108.2	3.97076	1.98941	yes	yes	0.33027	-0.481131
	GNAI3	120.983	47.1699	30.291	30.1054	16691.7	17520.8	84.0765	30.1982	17106.2	2.78416	1.47724	yes	yes	0.314963	-0.50174
	CLTA	127.135	56.6039	31.8312	45.5441	16773.3	17432.8	91.8694	38.6877	17103	2.37464	1.24771	yes	yes	0.310949	-0.507311
	SEC13	106.629	79.515	40.5592	32.4212	16868.6	17333.9	93.0721	36.4902	17101.2	2.55061	1.35084	yes	yes	0.330865	-0.48035
	PCM1	125.084	49.8653	32.3447	30.8773	16947.7	17240.4	87.4748	31.611	17094.1	2.76723	1.46844	yes	yes	0.326803	-0.485715
	ARPC2	159.944	95.6875	47.7469	71.0179	16837.1	17344.7	127.816	59.3824	17090.9	2.15242	1.10596	yes	yes	0.400407	-0.397498
	USO1	98.427	56.6039	16.429	23.9299	16471.4	17697.9	77.5154	20.1795	17084.6	3.8413	1.94159	yes	yes	0.335599	-0.474179
	SKP1	145.59	67.3856	40.0458	44.0002	16609.2	17554.4	106.488	42.023	17081.8	2.53404	1.34144	yes	yes	0.377388	-0.423212
	TNKS1BP1	96.3764	75.4719	25.6704	39.3686	17133.1	17024.2	85.9241	32.5195	17078.6	2.64224	1.40176	yes	yes	0.312698	-0.504874
	FOXK2	102.528	57.9516	22.0765	18.5264	17061.6	17089.4	80.2398	20.3015	17075.5	3.95242	1.98274	yes	yes	0.351019	-0.454669
	SRSF7	198.904	153.639	72.9038	75.6495	16824.3	17314.3	176.272	74.2766	17069.3	2.37318	1.24682	yes	yes	0.597534	-0.223637
	GOLGA3	120.983	59.2993	26.6972	31.6493	17444.3	16640.7	90.1412	29.1732	17042.5	3.08986	1.62754	yes	yes	0.357741	-0.446432
	ANP32A	129.185	92.9921	42.6128	51.7195	16309.8	17719.6	111.089	47.1662	17014.7	2.35526	1.23589	yes	yes	0.37569	-0.42517
	QARS1	94.3258	66.0379	21.5631	36.2809	16866.9	17159	80.1818	28.922	17012.9	2.77235	1.47111	yes	yes	0.3013	-0.521001
	SETD1B	77.9213	43.1268	27.724	16.2106	17420.5	16602.7	60.5241	21.9673	17011.6	2.75519	1.46215	yes	yes	0.22665	-0.644644
	LTA4H	106.629	64.6902	24.6435	30.8773	16673	17349.1	85.6597	27.7604	17011	3.08567	1.62559	yes	yes	0.340363	-0.468058
	EDC4	112.781	75.4719	29.2642	45.5441	17510.7	16445.1	94.1264	37.4041	16977.9	2.51647	1.3314	yes	yes	0.334095	-0.476131
	TMEM43	94.3258	55.2562	26.6972	20.8422	16811.6	17123.1	74.791	23.7697	16967.3	3.14649	1.65374	yes	yes	0.300703	-0.521862
	UQCRH	131.236	92.9921	42.0994	40.1405	16727.4	17180.7	112.114	41.12	16954	2.72651	1.44706	yes	yes	0.418744	-0.378051
	HID1	86.1236	43.1268	13.3486	18.5264	17062.5	16836.3	64.6252	15.9375	16949.4	4.05491	2.01967	yes	yes	0.287254	-0.541734
	TNPO1	164.045	134.771	66.2295	74.1056	16616	17280.6	149.408	70.1676	16948.3	2.1293	1.09038	yes	yes	0.467542	-0.330179
	RBM17	123.034	76.8196	31.8312	54.8073	16578.6	17282.8	99.9266	43.3193	16930.7	2.30675	1.20586	yes	yes	0.334348	-0.475802
	MCRS1	123.034	63.3424	28.7508	42.4563	16748.7	17109	93.1881	35.6036	16928.8	2.61738	1.38812	yes	yes	0.340157	-0.468321
	GATAD2A	114.831	76.8196	25.6704	42.4563	17002.9	16802.6	95.8255	34.0633	16902.8	2.81316	1.49219	yes	yes	0.365397	-0.437235
	EIF2A	88.1741	56.6039	18.9961	21.6141	16525	17276.3	72.389	20.3051	16900.6	3.56507	1.83393	yes	yes	0.308177	-0.5112
	DNAJC8	125.084	63.3424	29.7776	46.316	16437.4	17361	94.2133	38.0468	16899.2	2.47625	1.30816	yes	yes	0.332362	-0.478389
	VASP	84.073	63.3424	31.8312	33.9651	16638.1	17153.5	73.7077	32.8982	16895.8	2.24048	1.16381	yes	yes	0.241537	-0.617017
	FAM20B	102.528	64.6902	26.1838	35.5089	16542.9	17206.8	83.6091	30.8464	16874.8	2.7105	1.43856	yes	yes	0.312672	-0.504911
	MROH1	90.2247	40.4313	15.4022	24.7019	17918.9	15829.1	65.328	20.052	16874	3.25792	1.70395	yes	yes	0.268318	-0.57135
	TMEM123	147.64	64.6902	39.019	36.2809	16474	17235	106.165	37.6499	16854.5	2.8198	1.49559	yes	yes	0.406511	-0.390927
	SLC5A6	120.983	72.7764	21.0497	34.737	17139.9	16569	96.8798	27.8933	16854.4	3.47322	1.79627	yes	yes	0.409308	-0.38795
	DCAF11	92.2753	35.0405	17.9693	17.7545	16610.9	17080.7	63.6579	17.8619	16845.8	3.5639	1.83346	yes	yes	0.271854	-0.565664
	CLPTM1	106.629	67.3856	24.1301	35.5089	16769.1	16919.9	87.0074	29.8195	16844.5	2.9178	1.54488	yes	yes	0.339505	-0.469154
	SRP72	137.388	59.2993	30.8044	30.1054	16511.4	17162.2	98.3435	30.4549	16836.8	3.22915	1.69115	yes	yes	0.403215	-0.394463
	RPL22	100.478	45.8222	25.6704	27.0177	16336.2	17336.1	73.1499	26.344	16836.1	2.77672	1.47338	yes	yes	0.278008	-0.555942
	API5	133.286	86.2535	41.0726	42.4563	16422.9	17182.9	109.77	41.7645	16802.9	2.62831	1.39414	yes	yes	0.404725	-0.39284
	TM9SF4	92.2753	59.2993	22.0765	27.0177	16792.9	16797.2	75.7873	24.5471	16795	3.08742	1.6264	yes	yes	0.305092	-0.51557
	NPRL3	86.1236	52.5608	17.9693	26.2457	16920.4	16664.6	69.3422	22.1075	16792.5	3.13659	1.6492	yes	yes	0.281284	-0.550855
	UQCRC2	120.983	67.3856	33.3715	55.5792	16541.1	17022.1	94.1844	44.4753	16781.6	2.11768	1.08248	yes	yes	0.296211	-0.528398
	STRAP	147.64	128.033	44.153	57.1231	16567.5	16978.6	137.837	50.638	16773.1	2.722	1.44466	yes	yes	0.519872	-0.284103
	ATAD2	166.095	117.251	51.8541	67.9301	16701.9	16839.5	141.673	59.8921	16770.7	2.36547	1.24213	yes	yes	0.487642	-0.311899
	KCTD15	108.68	53.9085	26.6972	37.0528	16696.8	16828.7	81.2941	31.875	16762.7	2.5504	1.35073	yes	yes	0.294816	-0.530449
	RTL8C	114.831	45.8222	20.0229	30.8773	16826	16672.2	80.3268	25.4501	16749.1	3.15625	1.65821	yes	yes	0.327639	-0.484604
	STMN1	137.388	49.8653	27.2106	32.4212	16393.2	17093.8	93.6265	29.8159	16743.5	3.14015	1.65084	yes	yes	0.381107	-0.418953
	FZD6	86.1236	44.4745	11.8084	14.6667	16449.3	17009	65.299	13.2375	16729.2	4.93286	2.30243	yes	yes	0.311202	-0.506958
	RNF114	108.68	75.4719	16.429	34.737	16404.2	17031.8	92.0758	25.583	16718	3.5991	1.84764	yes	yes	0.397731	-0.400411
	BAX	73.8202	63.3424	23.1033	25.4738	16553.1	16867.8	68.5813	24.2886	16710.4	2.82361	1.49754	yes	yes	0.265061	-0.576654
	SDF4	116.882	80.8627	36.4519	37.0528	16674.7	16671.1	98.8724	36.7524	16672.9	2.69023	1.42773	yes	yes	0.372581	-0.42878
	RAB22A	112.781	44.4745	21.0497	23.9299	16263.1	17062.3	78.6277	22.4898	16662.7	3.49615	1.80577	yes	yes	0.336908	-0.472488
	CYP4F22	79.9719	35.0405	16.429	20.0703	16696.8	16617.9	57.5062	18.2496	16657.3	3.15109	1.65585	yes	yes	0.235671	-0.627693
	COG4	61.5168	66.0379	21.5631	33.9651	16502.9	16811.3	63.7774	27.7641	16657.1	2.29712	1.19982	yes	yes	0.216204	-0.665136
	PSMA4	131.236	99.7307	47.7469	50.1757	16343.8	16946	115.483	48.9613	16644.9	2.35867	1.23797	yes	yes	0.399654	-0.398316
	PIGT	82.0225	49.8653	21.0497	27.0177	16577.7	16710.2	65.9439	24.0337	16644	2.74381	1.45618	yes	yes	0.251804	-0.598937
	SNHG1	151.742	52.5608	27.2106	27.7896	16527.5	16746.1	102.151	27.5001	16636.8	3.71458	1.8932	yes	yes	0.44871	-0.348034
	RHBDF1	110.73	37.7359	17.9693	29.3335	16972.3	16300.6	74.2331	23.6514	16636.5	3.13864	1.65014	yes	yes	0.304041	-0.517067
	MLST8	104.579	75.4719	23.1033	39.3686	16679.8	16591.8	90.0252	31.236	16635.8	2.8821	1.52712	yes	yes	0.35339	-0.451745
	HMGCS1	182.5	157.682	84.1988	67.9301	16380.4	16889.5	170.091	76.0645	16635	2.23614	1.16101	yes	yes	0.565235	-0.247771
	MRPL3	135.337	72.7764	39.019	57.895	16329.4	16935.1	104.057	48.457	16632.3	2.1474	1.10259	yes	yes	0.334289	-0.475878
	ARHGAP5	108.68	67.3856	32.8581	47.0879	16381.3	16883	88.0327	39.973	16632.1	2.2023	1.13901	yes	yes	0.288957	-0.539167
	MTCH2	159.944	214.286	149.402	223.089	16415.3	16828.7	187.115	186.245	16622	1.00467	0.0067224	yes	yes	0.00523317
	GABARAPL2	79.9719	57.9516	16.429	31.6493	16469.7	16773.3	68.9617	24.0391	16621.5	2.86873	1.52041	yes	yes	0.270268	-0.568205
	SDC1	96.3764	102.426	37.9921	50.1757	16856.7	16384.3	99.4012	44.0839	16620.5	2.25482	1.17301	yes	yes	0.332826	-0.477782
	PATZ1	67.6685	40.4313	22.0765	21.6141	16451.9	16773.3	54.0499	21.8453	16612.6	2.47421	1.30697	yes	yes	0.193857	-0.712518
	CCT8	149.691	107.817	55.9614	58.6669	16276.7	16947.1	128.754	57.3142	16611.9	2.24646	1.16765	yes	yes	0.430053	-0.366478
	PSIP1	96.3764	71.4287	32.8581	21.6141	16191.6	17012.3	83.9026	27.2361	16601.9	3.08056	1.62319	yes	yes	0.341324	-0.466833
	FREM2	92.2753	33.6928	8.21452	16.2106	17741.1	15431.4	62.984	12.2126	16586.3	5.15732	2.36662	yes	yes	0.306105	-0.514129
	MAN2A2	90.2247	51.213	18.4827	16.9825	16866	16303.9	70.7189	17.7326	16585	3.98807	1.99569	yes	yes	0.319484	-0.495551
	FUBP3	100.478	75.4719	29.2642	40.9125	16228.2	16927.5	87.9747	35.0883	16577.9	2.50723	1.3261	yes	yes	0.319018	-0.496185
	DDX1	125.084	105.122	43.6396	40.9125	16202.7	16943.8	115.103	42.276	16573.3	2.72265	1.44501	yes	yes	0.439424	-0.357116
	MARK3	88.1741	75.4719	26.6972	23.9299	16371.9	16751.5	81.823	25.3136	16561.7	3.23238	1.6926	yes	yes	0.341205	-0.466984
	ELK4	104.579	37.7359	17.4558	26.2457	16355.8	16760.2	71.1573	21.8508	16558	3.25651	1.70333	yes	yes	0.297781	-0.526103
	MCMBP	135.337	86.2535	31.8312	44.0002	16508	16599.4	110.795	37.9157	16553.7	2.92215	1.54703	yes	yes	0.440262	-0.356289
	SLC35F5	102.528	45.8222	17.4558	23.9299	16462.1	16629.8	74.1751	20.6929	16545.9	3.58457	1.8418	yes	yes	0.323235	-0.490482
	NDUFS1	98.427	52.5608	29.2642	35.5089	16260.5	16827.6	75.4939	32.3866	16544	2.33102	1.22096	yes	yes	0.260561	-0.584091
	C7orf50	106.629	71.4287	34.9117	34.737	16430.6	16657	89.029	34.8243	16543.8	2.55651	1.35418	yes	yes	0.327643	-0.484599
	B2M	114.831	67.3856	30.291	24.7019	16094.7	16969.9	91.1085	27.4964	16532.3	3.31346	1.72834	yes	yes	0.384775	-0.414793
	SMS	104.579	72.7764	33.8849	40.9125	16127.8	16919.9	88.6775	37.3987	16523.9	2.37114	1.24558	yes	yes	0.310332	-0.508174
	NIBAN1	63.5674	32.3451	8.72792	12.3509	16589.6	16427.7	47.9562	10.5394	16508.7	4.55018	2.18592	yes	yes	0.226649	-0.644646
	ATP5MC3	139.438	92.9921	45.1798	56.3511	16322.6	16693.9	116.215	50.7655	16508.3	2.28926	1.19488	yes	yes	0.396466	-0.401794
	CUTA	112.781	39.0836	18.4827	20.8422	16253.7	16761.3	75.9323	19.6624	16507.5	3.86179	1.94927	yes	yes	0.340874	-0.467406
	MAGED2	65.618	26.9542	12.3218	13.1229	16372.8	16597.2	46.2861	12.7223	16485	3.63818	1.86322	yes	yes	0.203602	-0.691218
	OXCT1	131.236	61.9947	27.2106	32.4212	16169.5	16793.9	96.6153	29.8159	16481.7	3.2404	1.69617	yes	yes	0.405295	-0.392229
	URI1	141.489	80.8627	31.8312	42.4563	15950.9	17011.2	111.176	37.1438	16481.1	2.99312	1.58165	yes	yes	0.449194	-0.347566
	REV3L	104.579	39.0836	22.0765	26.2457	16419.5	16529.9	71.8311	24.1611	16474.7	2.97301	1.57192	yes	yes	0.289353	-0.538572
	MPRIP	147.64	130.728	46.2067	55.5792	16715.5	16211.5	139.184	50.8929	16463.5	2.73484	1.45146	yes	yes	0.536285	-0.270605
	RRM2B	77.9213	40.4313	16.9424	19.2983	16067.5	16850.4	59.1763	18.1204	16458.9	3.26573	1.70741	yes	yes	0.249445	-0.603025
	FAM102B	94.3258	32.3451	11.295	16.2106	16101.5	16791.7	63.3355	13.7528	16446.6	4.60528	2.20329	yes	yes	0.301477	-0.520746
	GPAA1	139.438	60.647	36.9653	43.2283	16486.7	16384.3	100.043	40.0968	16435.5	2.49503	1.31906	yes	yes	0.364734	-0.438024
	INPP5J	79.9719	24.2588	10.7816	14.6667	16724.8	16140.9	52.1154	12.7241	16432.9	4.09579	2.03414	yes	yes	0.23971	-0.620314
	TIMELESS	116.882	98.3829	31.3178	54.0353	16131.2	16707	107.632	42.6766	16419.1	2.52205	1.3346	yes	yes	0.395612	-0.402731
	TNPO2	86.1236	55.2562	20.5363	22.3861	16673	16140.9	70.6899	21.4612	16406.9	3.29385	1.71977	yes	yes	0.300048	-0.522809
	PIK3R3	92.2753	37.7359	15.4022	20.8422	16303	16499.5	65.0056	18.1222	16401.2	3.58707	1.84281	yes	yes	0.285853	-0.543858
	COPB1	139.438	64.6902	30.8044	44.0002	16259.7	16541.8	102.064	37.4023	16400.7	2.72882	1.44828	yes	yes	0.394262	-0.404215
	CMPK1	75.8708	56.6039	24.1301	37.8247	16091.3	16679.8	66.2373	30.9774	16385.5	2.13824	1.09643	yes	yes	0.215189	-0.66718
	HECTD4	123.034	53.9085	28.7508	29.3335	17133.1	15629.2	88.4711	29.0421	16381.1	3.0463	1.60706	yes	yes	0.362789	-0.440346
	EMD	96.3764	76.8196	16.429	31.6493	16457	16288.7	86.598	24.0391	16372.8	3.60237	1.84895	yes	yes	0.38209	-0.417835
	HEXB	90.2247	56.6039	27.2106	23.9299	16055.5	16639.6	73.4143	25.5703	16347.6	2.87108	1.52159	yes	yes	0.292667	-0.533626
	KIAA1109	112.781	41.7791	20.0229	19.2983	16674.7	16019.2	77.28	19.6606	16346.9	3.9307	1.97479	yes	yes	0.352478	-0.452868
	EDF1	92.2753	84.9058	39.019	47.0879	16071.7	16586.4	88.5906	43.0534	16329	2.05769	1.04102	yes	yes	0.278872	-0.554595
	CYFIP1	157.893	97.0352	34.3983	47.8599	16532.6	16109.4	127.464	41.1291	16321	3.09913	1.63186	yes	yes	0.528981	-0.27656
	PALLD	172.247	71.4287	27.2106	34.737	16138.9	16460.3	121.838	30.9738	16299.6	3.93358	1.97584	yes	yes	0.557462	-0.253785
	ITM2B	86.1236	68.7333	23.6167	25.4738	15972.2	16610.3	77.4284	24.5453	16291.2	3.15452	1.65742	yes	yes	0.324611	-0.488637
	UBE2A	106.629	59.2993	27.724	38.5967	16067.5	16506	82.9643	33.1603	16286.7	2.50191	1.32303	yes	yes	0.305795	-0.51457
	NUDT3	86.1236	29.6497	13.3486	13.8948	16091.3	16471.2	57.8866	13.6217	16281.2	4.24959	2.08732	yes	yes	0.271877	-0.565628
	AK2	129.185	106.469	37.9921	46.316	16003.7	16554.9	117.827	42.1541	16279.3	2.79516	1.48293	yes	yes	0.464844	-0.332693
	MAP7	94.3258	70.081	26.1838	39.3686	15955.2	16588.5	82.2034	32.7762	16271.9	2.50802	1.32655	yes	yes	0.303759	-0.517471
	CACYBP	135.337	64.6902	33.3715	37.0528	15923.7	16527.7	100.014	35.2121	16225.7	2.84032	1.50605	yes	yes	0.399375	-0.398619
	PGP	106.629	82.2104	41.586	67.9301	16280.1	16168.1	94.4198	54.7581	16224.1	1.72431	0.786018	yes	yes	0.244462
	ASPM	94.3258	47.1699	18.4827	30.1054	16815	15629.2	70.7479	24.294	16222.1	2.91215	1.54208	yes	yes	0.286362	-0.543085
	PPM1K	100.478	33.6928	12.8352	6.9474	16055.5	16326.7	67.0852	9.89129	16191.1	6.78224	2.76176	yes	yes	0.353242	-0.451928
	NOC2L	106.629	64.6902	32.8581	47.8599	16385.5	15989.9	85.6597	40.359	16187.7	2.12244	1.08573	yes	yes	0.279846	-0.55308
	CHTOP	159.944	129.38	49.2871	77.1933	15930.5	16427.7	144.662	63.2402	16179.1	2.2875	1.19377	yes	yes	0.503252	-0.298214
	TELO2	79.9719	66.0379	21.5631	34.737	16545.4	15808.4	73.0049	28.1501	16176.9	2.59342	1.37486	yes	yes	0.277277	-0.557087
	RANGAP1	96.3764	68.7333	31.8312	38.5967	16197.6	16155	82.5548	35.214	16176.3	2.34438	1.22921	yes	yes	0.292656	-0.533643
	SVIL	79.9719	40.4313	13.862	23.9299	16153.3	16198.5	60.2016	18.896	16175.9	3.18595	1.67172	yes	yes	0.255353	-0.592859
	RAI1	118.933	70.081	23.1033	27.0177	16614.3	15725.9	94.5068	25.0605	16170.1	3.77115	1.915	yes	yes	0.429474	-0.367063
	ENOSF1	73.8202	35.0405	7.70111	14.6667	16471.4	15867.1	54.4304	11.1839	16169.3	4.86684	2.28299	yes	yes	0.267461	-0.57274
	IBTK	118.933	45.8222	24.1301	38.5967	15768.1	16564.6	82.3774	31.3634	16166.4	2.62654	1.39317	yes	yes	0.315556	-0.500923
	ABCE1	137.388	95.6875	47.7469	52.4915	15789.4	16527.7	116.538	50.1192	16158.5	2.32521	1.21736	yes	yes	0.411042	-0.386113
	TSC22D1	84.073	57.9516	22.0765	20.0703	16023.2	16291.9	71.0123	21.0734	16157.6	3.36976	1.75265	yes	yes	0.309074	-0.509937
	C12orf49	110.73	75.4719	26.1838	32.4212	15868.4	16419.1	93.1011	29.3025	16143.8	3.17724	1.66778	yes	yes	0.395191	-0.403193
	PPP1CB	110.73	56.6039	20.5363	34.737	15624.4	16625.5	83.6671	27.6366	16124.9	3.0274	1.59808	yes	yes	0.347477	-0.459074
	EIF2S1	159.944	106.469	47.7469	53.2634	15629.5	16597.2	133.207	50.5051	16113.4	2.63748	1.39916	yes	yes	0.513247	-0.289673
	HELZ2	77.9213	30.9974	9.75474	16.2106	16867.7	15333.6	54.4594	12.9827	16100.7	4.19477	2.06859	yes	yes	0.257608	-0.58904
	ALDH3B2	53.3146	39.0836	10.2681	17.7545	16026.6	16170.2	46.1991	14.0113	16098.4	3.29727	1.72127	yes	yes	0.199944	-0.699092
	GOLGA2	96.3764	57.9516	22.5899	23.158	16111.7	16064.9	77.164	22.874	16088.3	3.37344	1.75422	yes	yes	0.337451	-0.471789
	TMEM30B	82.0225	43.1268	18.4827	25.4738	15458.5	16673.3	62.5746	21.9782	16065.9	2.84712	1.5095	yes	yes	0.252686	-0.597418
	MAP3K11	106.629	70.081	31.8312	33.9651	15933.9	16174.6	88.3551	32.8982	16054.3	2.68572	1.42531	yes	yes	0.345434	-0.461634
	USP24	120.983	67.3856	23.1033	23.9299	16394	15687.8	94.1844	23.5166	16040.9	4.00501	2.00181	yes	yes	0.440546	-0.356009
	ANXA6	82.0225	53.9085	14.8888	29.3335	15897.4	16150.7	67.9655	22.1111	16024	3.07381	1.62003	yes	yes	0.28616	-0.543391
	SRF	182.5	177.898	60.0686	64.0705	15988.4	16036.6	180.199	62.0696	16012.5	2.90318	1.53763	yes	yes	0.737733	-0.132101
	TSN	116.882	79.515	25.157	25.4738	15710.3	16300.6	98.1985	25.3154	16005.4	3.87901	1.95569	yes	yes	0.455365	-0.341641
	CASC3	100.478	32.3451	25.157	20.0703	15771.5	16210.4	66.4113	22.6136	15991	2.93678	1.55424	yes	yes	0.27389	-0.562424
	CAPZA1	116.882	67.3856	31.3178	41.6844	15634.6	16344.1	92.1338	36.5011	15989.3	2.52414	1.33579	yes	yes	0.347936	-0.4585
	CDK10	69.7191	51.213	14.8888	19.2983	16310.7	15642.2	60.4661	17.0936	15976.4	3.53736	1.82267	yes	yes	0.271478	-0.566266
	DNAJB1	98.427	80.8627	32.3447	41.6844	15662.6	16288.7	89.6448	37.0145	15975.7	2.42188	1.27613	yes	yes	0.329441	-0.482223
	SEC11A	90.2247	64.6902	27.724	42.4563	15524	16410.4	77.4574	35.0902	15967.2	2.20738	1.14234	yes	yes	0.26534	-0.576198
	XIAP	88.1741	39.0836	15.9156	27.7896	15884.6	16032.3	63.6289	21.8526	15958.4	2.91173	1.54188	yes	yes	0.261782	-0.582061
	ECT2	147.64	79.515	27.2106	44.7721	15591.2	16321.3	113.578	35.9914	15956.2	3.15569	1.65796	yes	yes	0.486245	-0.313145
	CLIP1	125.084	82.2104	27.724	37.0528	15699.2	16209.4	103.647	32.3884	15954.3	3.20014	1.67813	yes	yes	0.446644	-0.350038
	PATJ	59.4663	37.7359	7.70111	18.5264	15911.8	15993.1	48.6011	13.1138	15952.5	3.70612	1.88991	yes	yes	0.222457	-0.652755
	NDFIP1	108.68	53.9085	16.9424	21.6141	15721.3	16175.7	81.2941	19.2783	15948.5	4.21687	2.07617	yes	yes	0.388851	-0.410217
	CCNB1	125.084	61.9947	26.6972	44.0002	15645.6	16249.6	93.5395	35.3487	15947.6	2.64619	1.40392	yes	yes	0.364888	-0.437841
	ABL1	96.3764	44.4745	24.1301	26.2457	15877.8	15998.6	70.4254	25.1879	15938.2	2.796	1.48336	yes	yes	0.283831	-0.54694
	SLC2A1	133.286	74.1241	42.6128	61.7547	15917.8	15952.9	103.705	52.1837	15935.4	1.98731	0.990818	yes	yes	0.323316
	ZFR	211.208	150.944	77.5245	78.7372	15796.2	16059.4	181.076	78.1308	15927.8	2.3176	1.21263	yes	yes	0.646323	-0.189551
	THBS1	151.742	70.081	33.8849	41.6844	16066.6	15766.1	110.911	37.7846	15916.3	2.93535	1.55353	yes	yes	0.459444	-0.337768
	SERINC1	92.2753	49.8653	22.5899	21.6141	15729	16098.5	71.0703	22.102	15913.8	3.21556	1.68507	yes	yes	0.30771	-0.511858
	HELZ	120.983	41.7791	17.9693	19.2983	16252	15573.8	81.3811	18.6338	15912.9	4.36739	2.12677	yes	yes	0.394318	-0.404154
	SLC25A24	90.2247	53.9085	20.5363	30.8773	15532.5	16286.5	72.0666	25.7068	15909.5	2.8034	1.48718	yes	yes	0.291397	-0.535516
	RSF1	92.2753	47.1699	22.0765	18.5264	15858.2	15949.7	69.7226	20.3015	15904	3.43436	1.78004	yes	yes	0.310747	-0.507593
	ZNF146	112.781	106.469	30.291	40.1405	15401.6	16399.5	109.625	35.2158	15900.5	3.11295	1.63828	yes	yes	0.467967	-0.329784
	SF3A3	79.9719	57.9516	22.5899	27.0177	15558.9	16239.8	68.9617	24.8038	15899.3	2.78029	1.47524	yes	yes	0.277735	-0.55637
	PCNX1	116.882	49.8653	18.4827	22.3861	16081.1	15712.8	83.3737	20.4344	15896.9	4.08007	2.02859	yes	yes	0.395921	-0.402392
	CHMP4B	98.427	59.2993	29.2642	33.1931	15563.1	16227.8	78.8631	31.2287	15895.5	2.52534	1.33648	yes	yes	0.299673	-0.523353
	FAM107B	79.9719	44.4745	26.1838	26.2457	15473	16286.5	62.2232	26.2148	15879.7	2.37359	1.24707	yes	yes	0.226757	-0.644439
	ATP2C2	57.4157	26.9542	13.862	13.1229	15774	15936.7	42.185	13.4924	15855.4	3.12657	1.64458	yes	yes	0.180964	-0.742407
	AHSA1	69.7191	64.6902	30.8044	30.1054	15319.1	16359.3	67.2046	30.4549	15839.2	2.20669	1.14189	yes	yes	0.232018	-0.634479
	PSMD12	135.337	79.515	34.9117	45.5441	15342.9	16298.5	107.426	40.2279	15820.7	2.67044	1.41708	yes	yes	0.424749	-0.371867
	PMEPA1	114.831	70.081	28.2374	31.6493	15846.3	15763.9	92.4562	29.9433	15805.1	3.08771	1.62654	yes	yes	0.395523	-0.402828
	DCAF13	137.388	102.426	32.8581	47.0879	15451.7	16050.7	119.907	39.973	15751.2	2.9997	1.58482	yes	yes	0.507477	-0.294584
	LRPAP1	110.73	67.3856	18.9961	25.4738	15619.3	15867.1	89.058	22.2349	15743.2	4.00532	2.00192	yes	yes	0.424457	-0.372167
	GDF15	90.2247	40.4313	11.8084	10.8071	16059.8	15424.9	65.328	11.3077	15742.4	5.7773	2.53039	yes	yes	0.343153	-0.464513
	CGN	96.3764	40.4313	13.862	15.4387	15799.6	15670.5	68.4039	14.6503	15735	4.6691	2.22314	yes	yes	0.341617	-0.46646
	PRPF4B	149.691	66.0379	26.6972	25.4738	15581.8	15887.8	107.864	26.0855	15734.8	4.13504	2.0479	yes	yes	0.519733	-0.28422
	STK24	88.1741	71.4287	24.6435	26.2457	15527.4	15911.7	79.8014	25.4446	15719.5	3.13628	1.64905	yes	yes	0.345791	-0.461186
	ARGLU1	118.933	75.4719	37.4787	17.7545	15615.9	15812.8	97.2022	27.6166	15714.3	3.5197	1.81545	yes	yes	0.442816	-0.353776
	ANXA7	135.337	83.5581	37.9921	37.0528	15461.1	15957.3	109.448	37.5225	15709.2	2.91685	1.54441	yes	yes	0.457854	-0.339273
	MAPRE1	125.084	90.2967	51.8541	48.6318	15362.4	16036.6	107.69	50.243	15699.5	2.14339	1.0999	yes	yes	0.365919	-0.436615
	SMARCD1	112.781	61.9947	24.1301	32.4212	15708.6	15667.2	87.3878	28.2757	15687.9	3.09057	1.62787	yes	yes	0.376801	-0.423888
	ZBTB7A	79.9719	47.1699	20.5363	23.158	15767.2	15586.8	63.5709	21.8471	15677	2.9098	1.54092	yes	yes	0.266146	-0.57488
	SUMO1	123.034	60.647	34.9117	44.0002	15068.2	16273.5	91.8404	39.4559	15670.8	2.32767	1.21889	yes	yes	0.33428	-0.47589
	CUL4B	125.084	43.1268	18.4827	26.2457	15424.5	15888.8	84.1055	22.3642	15656.7	3.76072	1.91101	yes	yes	0.394345	-0.404124
	ARL8B	127.135	57.9516	24.6435	17.7545	15124.3	16178.9	92.5432	21.199	15651.6	4.36545	2.12613	yes	yes	0.455826	-0.341201
	GPRC5A	143.539	86.2535	36.9653	29.3335	15640.5	15659.6	114.896	33.1494	15650.1	3.46602	1.79328	yes	yes	0.522343	-0.282044
	LARP4	129.185	71.4287	29.7776	34.737	15456.8	15787.8	100.307	32.2573	15622.3	3.10959	1.63672	yes	yes	0.435593	-0.360919
	A2M	139.438	71.4287	36.9653	49.4037	15972.2	15228.3	105.433	43.1845	15600.2	2.44146	1.28775	yes	yes	0.399026	-0.398999
	BZW2	147.64	79.515	40.0458	42.4563	15386.2	15813.9	113.578	41.251	15600.1	2.75333	1.46118	yes	yes	0.463631	-0.333828
	LSM14A	77.9213	59.2993	21.5631	35.5089	15654.1	15536.8	68.6103	28.536	15595.5	2.40434	1.26564	yes	yes	0.256961	-0.590133
	RBBP6	90.2247	52.5608	21.0497	16.9825	15633.7	15533.6	71.3927	19.0161	15583.6	3.75433	1.90855	yes	yes	0.3361	-0.473532
	MAN2C1	106.629	45.8222	16.429	26.2457	16126.1	15029.4	76.2257	21.3374	15577.8	3.5724	1.83689	yes	yes	0.35235	-0.453026
	AGAP3	102.528	86.2535	21.5631	34.737	15731.5	15393.4	94.3908	28.1501	15562.5	3.35313	1.74551	yes	yes	0.425644	-0.370953
	PPP1R9B	102.528	51.213	24.1301	26.2457	15513.8	15608.5	76.8706	25.1879	15561.2	3.05188	1.6097	yes	yes	0.332126	-0.478698
	SNX5	108.68	71.4287	40.5592	50.1757	15361.6	15757.4	90.0542	45.3674	15559.5	1.985	0.989138	yes	yes	0.2872
	KCTD20	98.427	45.8222	26.6972	30.8773	15297.8	15820.4	72.1246	28.7873	15559.1	2.50543	1.32506	yes	yes	0.278534	-0.555122
	AP2A1	123.034	83.5581	31.3178	30.1054	15697.5	15411.9	103.296	30.7116	15554.7	3.36341	1.74993	yes	yes	0.466639	-0.331019
	CD55	100.478	32.3451	14.8888	10.8071	15200	15900.8	66.4113	12.8479	15550.4	5.16902	2.36989	yes	yes	0.34445	-0.462874
	ATP2C1	127.135	56.6039	32.3447	39.3686	15423.7	15672.6	91.8694	35.8566	15548.1	2.56213	1.35734	yes	yes	0.360253	-0.443392
	CD81	112.781	101.078	34.3983	40.1405	15505.3	15562.9	106.93	37.2694	15534.1	2.8691	1.5206	yes	yes	0.448434	-0.348301
	SNRPB	178.399	101.078	56.4748	61.7547	15615.9	15409.7	139.739	59.1147	15512.8	2.36385	1.24114	yes	yes	0.519725	-0.284226
	ANK3	79.9719	40.4313	13.862	11.579	15625.2	15399.9	60.2016	12.7205	15512.6	4.73265	2.24265	yes	yes	0.306082	-0.514163
	MRPL51	92.2753	76.8196	34.9117	45.5441	15207.7	15800.8	84.5474	40.2279	15504.2	2.10171	1.07156	yes	yes	0.285854	-0.543855
	ANKRD50	84.073	44.4745	20.0229	15.4387	15333.5	15660.7	64.2738	17.7308	15497.1	3.62498	1.85797	yes	yes	0.300333	-0.522396
	ZNF706	112.781	61.9947	23.6167	34.737	15335.2	15658.5	87.3878	29.1769	15496.9	2.99511	1.58261	yes	yes	0.37563	-0.425239
	STK11	63.5674	53.9085	18.4827	22.3861	15550.4	15415.1	58.7379	20.4344	15482.8	2.87447	1.5233	yes	yes	0.247395	-0.606609
	SRP14	30.7584	25.6065	7.70111	10.8071	15250.2	15708.5	28.1825	9.25409	15479.3	3.04541	1.60664	yes	yes	0.122282	-0.912639
	TATDN1	100.478	33.6928	15.4022	23.9299	14902.3	16043.1	67.0852	19.6661	15472.7	3.41121	1.77028	yes	yes	0.306469	-0.513614
	SNHG7	57.4157	33.6928	18.4827	14.6667	15516.4	15419.5	45.5543	16.5747	15467.9	2.74842	1.4586	yes	yes	0.187353	-0.72734
	ZC3HAV1	86.1236	60.647	21.0497	23.158	15750.2	15176.1	73.3853	22.1038	15463.2	3.32002	1.73119	yes	yes	0.331636	-0.479338
	PPP2CA	123.034	105.122	40.5592	37.0528	15109.9	15795.4	114.078	38.806	15452.6	2.93969	1.55566	yes	yes	0.487112	-0.312371
	ARFGEF1	86.1236	52.5608	20.5363	19.2983	15427.1	15465.1	69.3422	19.9173	15446.1	3.4815	1.79971	yes	yes	0.319983	-0.494873
	POLE3	137.388	78.1673	32.8581	44.0002	14980.6	15903	107.777	38.4291	15441.8	2.80458	1.48778	yes	yes	0.449095	-0.347661
	CSAD	114.831	36.3882	14.8888	16.9825	16036.8	14845.8	75.6098	15.9357	15441.3	4.74469	2.24631	yes	yes	0.386457	-0.412898
	SP3	131.236	87.6013	55.448	73.3337	15056.3	15786.7	109.419	64.3908	15421.5	1.69929	0.764931	yes	yes	0.291981
	RBM25	161.994	101.078	46.7201	47.8599	15297.8	15511.8	131.536	47.29	15404.8	2.78149	1.47586	yes	yes	0.546884	-0.262105
	SLC9A1	84.073	53.9085	28.7508	23.9299	15941.6	14864.3	68.9907	26.3404	15402.9	2.6192	1.38913	yes	yes	0.276898	-0.557681
	TET3	102.528	37.7359	22.0765	23.158	15575	15213	70.132	22.6173	15394	3.10082	1.63265	yes	yes	0.308657	-0.510524
	FAM214A	86.1236	37.7359	14.8888	18.5264	15152.4	15633.5	61.9298	16.7076	15392.9	3.70668	1.89013	yes	yes	0.293785	-0.531971
	SPG21	73.8202	55.2562	17.4558	21.6141	15257.8	15485.8	64.5382	19.535	15371.8	3.30372	1.72409	yes	yes	0.292765	-0.533481
	PSMD8	137.388	119.946	47.7469	69.474	15275.7	15449.9	128.667	58.6104	15362.8	2.19529	1.13441	yes	yes	0.456014	-0.341022
	EIF3L	135.337	56.6039	23.6167	23.158	15276.5	15447.7	95.9705	23.3874	15362.1	4.10352	2.03686	yes	yes	0.472481	-0.325616
	GGA2	114.831	64.6902	27.2106	44.7721	15412.6	15308.7	89.7608	35.9914	15360.6	2.49395	1.31844	yes	yes	0.350047	-0.455874
	DIP2C	88.1741	39.0836	15.4022	21.6141	15270.6	15427.1	63.6289	18.5082	15348.8	3.43788	1.78152	yes	yes	0.293968	-0.531699
	AFDN	106.629	57.9516	19.5095	33.1931	15457.7	15222.8	82.2904	26.3513	15340.3	3.12282	1.64285	yes	yes	0.364656	-0.438117
	SOD1	147.64	92.9921	46.2067	43.2283	14927.9	15750.9	120.316	44.7175	15339.4	2.69059	1.42792	yes	yes	0.492842	-0.307292
	MOGS	90.2247	56.6039	21.0497	31.6493	15450	15214.1	73.4143	26.3495	15332.1	2.78618	1.47829	yes	yes	0.30697	-0.512905
	CIAO1	123.034	75.4719	24.6435	33.9651	15214.5	15419.5	99.2528	29.3043	15317	3.38697	1.75999	yes	yes	0.456673	-0.340395
	DCTN5	110.73	67.3856	29.7776	40.1405	15202.5	15388	89.058	34.9591	15295.3	2.54749	1.34908	yes	yes	0.353697	-0.451369
	GALNT6	114.831	59.2993	23.6167	26.2457	15102.2	15487.9	87.0654	24.9312	15295.1	3.49222	1.80414	yes	yes	0.406237	-0.391221
	PWWP2B	96.3764	48.5176	20.0229	23.9299	15267.2	15313	72.447	21.9764	15290.1	3.29658	1.72097	yes	yes	0.330087	-0.481372
	OAT	104.579	70.081	27.2106	49.4037	15018.9	15541.2	87.3298	38.3072	15280	2.27973	1.18886	yes	yes	0.320829	-0.493727
	PLXNB1	110.73	49.8653	18.9961	21.6141	16134.6	14402.5	80.2978	20.3051	15268.6	3.95456	1.98352	yes	yes	0.392916	-0.4057
	TRIM8	123.034	56.6039	15.4022	22.3861	15218.7	15317.4	89.8188	18.8941	15268	4.75379	2.24908	yes	yes	0.46453	-0.332986
	UBE2J1	67.6685	43.1268	22.0765	20.0703	14897.2	15633.5	55.3977	21.0734	15265.4	2.6288	1.3944	yes	yes	0.22485	-0.648106
	BRPF3	82.0225	37.7359	16.9424	23.158	15217.9	15302.1	59.8792	20.0502	15260	2.98646	1.57844	yes	yes	0.261002	-0.583355
	PPP6R1	129.185	55.2562	39.5324	55.5792	15358.2	15099	92.2208	47.5558	15228.6	1.93921	0.955471	yes	yes	0.293297
	PRDX3	98.427	67.3856	32.3447	39.3686	15213.6	15239.1	82.9063	35.8566	15226.4	2.31216	1.20924	yes	yes	0.309001	-0.51004
	FOXM1	127.135	68.7333	35.4251	50.1757	15105.6	15343.4	97.9341	42.8004	15224.5	2.28816	1.19419	yes	yes	0.362137	-0.441127
	THEM6	69.7191	44.4745	19.5095	22.3861	15238.3	15185.9	57.0968	20.9478	15212.1	2.72567	1.44661	yes	yes	0.237634	-0.624092
	LRP3	86.1236	56.6039	20.5363	30.8773	15344.6	15070.7	71.3637	25.7068	15207.6	2.77606	1.47304	yes	yes	0.300223	-0.522555
	PBX1	139.438	59.2993	49.2871	59.4389	15071.6	15308.7	99.3687	54.363	15190.1	1.82788	0.870168	yes	yes	0.296283
	AP1S1	86.1236	47.1699	16.9424	23.9299	14996.7	15380.4	66.6467	20.4362	15188.6	3.26121	1.70541	yes	yes	0.304246	-0.516775
	AJUBA	71.7697	48.5176	16.9424	22.3861	15145.6	15171.8	60.1436	19.6643	15158.7	3.05853	1.61284	yes	yes	0.267038	-0.573427
	CAST	96.3764	86.2535	30.8044	31.6493	14779	15519.4	91.315	31.2269	15149.2	2.92425	1.54806	yes	yes	0.396641	-0.401602
	PRELID1	131.236	84.9058	40.5592	54.8073	15072.4	15221.7	108.071	47.6832	15147.1	2.26643	1.18042	yes	yes	0.398675	-0.399381
	RAB11A	112.781	61.9947	29.7776	31.6493	14548.6	15683.5	87.3878	30.7134	15116	2.84526	1.50856	yes	yes	0.374929	-0.426051
	QKI	358.848	380.055	141.7	162.878	14963.6	15258.7	369.451	152.289	15111.1	2.42599	1.27857	yes	yes	1.4371	0.157488	yes
	E4F1	90.2247	60.647	21.5631	34.737	15668.6	14551.4	75.4359	28.1501	15110	2.67978	1.42211	yes	yes	0.312944	-0.504533
	ATP13A3	116.882	66.0379	17.9693	37.0528	14982.3	15232.6	91.4599	27.511	15107.4	3.32448	1.73313	yes	yes	0.423294	-0.373358
	FN1	114.831	134.771	77.0111	85.6846	16032.6	14171.1	124.801	81.3478	15101.8	1.53417	0.617457	yes	yes	0.287736
	EVL	92.2753	39.0836	15.4022	12.3509	15037.6	15163.1	65.6795	13.8766	15100.3	4.73312	2.24279	yes	yes	0.343058	-0.464632
	ACTR1B	71.7697	35.0405	10.7816	13.1229	15054.6	15141.3	53.4051	11.9522	15098	4.46822	2.1597	yes	yes	0.274559	-0.561364
	PUM1	194.803	203.504	115.003	86.4565	15022.3	15171.8	199.154	100.73	15097	1.97711	0.983392	yes	yes	0.651944
	PGRMC1	116.882	99.7307	34.9117	44.7721	14811.3	15381.5	108.306	39.8419	15096.4	2.7184	1.44276	yes	yes	0.453515	-0.343408
	ELF1	96.3764	47.1699	15.9156	19.2983	14659.1	15529.2	71.7731	17.607	15094.2	4.0764	2.0273	yes	yes	0.358855	-0.445081
	NPTN	106.629	45.8222	28.7508	29.3335	14732.3	15445.6	76.2257	29.0421	15088.9	2.62466	1.39213	yes	yes	0.312704	-0.504867
	SLK	104.579	48.5176	24.6435	34.737	15080.1	15093.5	76.5481	29.6903	15086.8	2.57822	1.36638	yes	yes	0.310588	-0.507815
	DNAJA1	145.59	125.337	60.0686	71.7898	14614	15540.1	135.464	65.9292	15077.1	2.05468	1.03891	yes	yes	0.461193	-0.336118
	UTRN	110.73	61.9947	23.1033	15.4387	15472.1	14650.2	86.3625	19.271	15061.2	4.48148	2.16397	yes	yes	0.44546	-0.351192
	KIFC2	69.7191	53.9085	20.0229	21.6141	15609.9	14496	61.8138	20.8185	15052.9	2.96917	1.57006	yes	yes	0.272341	-0.564888
	RNH1	112.781	71.4287	28.2374	32.4212	14275.6	15811.7	92.1048	30.3293	15043.6	3.03683	1.60256	yes	yes	0.410642	-0.386537
	TRIM56	79.9719	47.1699	15.9156	16.2106	15316.5	14763.2	63.5709	16.0631	15039.9	3.95757	1.98462	yes	yes	0.315879	-0.500479
	CPE	90.2247	43.1268	15.9156	23.9299	14716.1	15343.4	66.6757	19.9228	15029.8	3.34671	1.74274	yes	yes	0.311069	-0.507143
	APEH	116.882	84.9058	24.6435	20.8422	15047.8	15000.1	100.894	22.7429	15023.9	4.43629	2.14935	yes	yes	0.520177	-0.283849
	ATG13	69.7191	41.7791	15.4022	13.8948	14830.1	15206.5	55.7491	14.6485	15018.3	3.80579	1.92819	yes	yes	0.27367	-0.562773
	RUVBL2	125.084	102.426	35.9385	45.5441	14970.4	15065.3	113.755	40.7413	15017.8	2.79213	1.48137	yes	yes	0.486181	-0.313202
	MARK2	92.2753	44.4745	21.5631	22.3861	14980.6	15027.3	68.3749	21.9746	15003.9	3.11154	1.63763	yes	yes	0.309254	-0.509684
	ARFGAP1	79.9719	60.647	23.1033	33.1931	15418.6	14570.9	70.3095	28.1482	14994.7	2.49783	1.32067	yes	yes	0.281173	-0.551026
	DENND4B	84.073	43.1268	17.9693	30.8773	15452.6	14511.2	63.5999	24.4233	14981.9	2.60407	1.38077	yes	yes	0.261493	-0.582539
	SCYL2	110.73	43.1268	23.1033	31.6493	14765.4	15196.8	76.9285	27.3763	14981.1	2.81004	1.49059	yes	yes	0.330765	-0.48048
	NPDC1	90.2247	36.3882	18.9961	14.6667	15504.5	14425.3	63.3065	16.8314	14964.9	3.76121	1.9112	yes	yes	0.31056	-0.507854
	KLF10	84.073	52.5608	18.4827	17.7545	14894.7	15012	68.3169	18.1186	14953.4	3.77055	1.91477	yes	yes	0.335699	-0.47405
	CCDC85C	98.427	44.4745	18.9961	20.0703	14904.9	14990.3	71.4507	19.5332	14947.6	3.65792	1.87102	yes	yes	0.34733	-0.459257
	NAT10	116.882	49.8653	34.3983	36.2809	15137.1	14756.7	83.3737	35.3396	14946.9	2.35922	1.23831	yes	yes	0.321365	-0.493001
	STK26	100.478	61.9947	20.5363	30.8773	14569	15322.8	81.2361	25.7068	14945.9	3.1601	1.65997	yes	yes	0.371536	-0.429999
	PFKP	108.68	140.162	53.9078	87.2285	14848.8	15040.3	124.421	70.5681	14944.5	1.76313	0.81814	yes	yes	0.360351
	LEO1	112.781	67.3856	20.0229	29.3335	14540.1	15346.7	90.0832	24.6782	14943.4	3.65032	1.86802	yes	yes	0.437686	-0.358837
	CSNK2A1	159.944	92.9921	40.0458	43.2283	14538.4	15343.4	126.468	41.637	14940.9	3.03739	1.60283	yes	yes	0.567777	-0.245822
	FBRSL1	96.3764	36.3882	16.9424	30.1054	15139.6	14717.6	66.3823	23.5239	14928.6	2.82191	1.49667	yes	yes	0.287089	-0.541984
	EID1	137.388	84.9058	29.7776	37.0528	14570.7	15283.7	111.147	33.4152	14927.2	3.32623	1.73389	yes	yes	0.520738	-0.28338
	WDR59	96.3764	36.3882	11.8084	20.8422	15098.8	14743.7	66.3823	16.3253	14921.2	4.06623	2.02369	yes	yes	0.335475	-0.47434
	BHLHE40	112.781	52.5608	15.9156	30.8773	14975.5	14856.7	82.6708	23.3965	14916.1	3.53347	1.82109	yes	yes	0.397385	-0.400788
	ANKIB1	92.2753	43.1268	22.0765	28.5615	14677.8	15131.6	67.701	25.319	14904.7	2.67392	1.41896	yes	yes	0.284353	-0.546142
	PDCD2	75.8708	60.647	26.1838	31.6493	14726.3	15080.5	68.2589	28.9165	14903.4	2.36055	1.23912	yes	yes	0.263983	-0.578425
	EEF1AKNMT	112.781	41.7791	24.1301	30.1054	14830.1	14965.3	77.28	27.1178	14897.7	2.84979	1.51086	yes	yes	0.336711	-0.472742
	GPD1L	82.0225	35.0405	13.862	11.579	14650.6	15141.3	58.5315	12.7205	14896	4.60135	2.20206	yes	yes	0.307539	-0.512099
	NR1D2	69.7191	40.4313	17.4558	14.6667	14583.4	15190.2	55.0752	16.0613	14886.8	3.42907	1.77782	yes	yes	0.26207	-0.581582
	SMAD3	84.073	75.4719	34.9117	41.6844	14968.7	14789.3	79.7724	38.298	14879	2.08294	1.05862	yes	yes	0.278745	-0.554794
	GALNT10	164.045	94.3398	48.7737	55.5792	14603.8	15153.3	129.192	52.1764	14878.6	2.47607	1.30805	yes	yes	0.51763	-0.28598
	EIF3K	159.944	106.469	41.586	53.2634	14804.5	14939.3	133.207	47.4247	14871.9	2.8088	1.48995	yes	yes	0.576805	-0.238971
	MCFD2	123.034	97.0352	35.4251	37.0528	14603	15139.2	110.034	36.2389	14871.1	3.03636	1.60234	yes	yes	0.496235	-0.304312
	SOGA1	88.1741	53.9085	27.2106	18.5264	15358.2	14377.5	71.0413	22.8685	14867.9	3.10651	1.6353	yes	yes	0.324006	-0.489446
	UBE3C	92.2753	79.515	42.0994	54.8073	14667.6	15063.1	85.8951	48.4533	14865.4	1.77274	0.82598	yes	yes	0.251873
	ITGB4	118.933	67.3856	22.0765	32.4212	15257	14471	93.1591	27.2489	14864	3.41883	1.7735	yes	yes	0.443423	-0.353182
	VTI1B	114.831	45.8222	23.6167	44.7721	14467.8	15229.3	80.3268	34.1944	14848.6	2.34912	1.23212	yes	yes	0.310686	-0.507678
	USP11	75.8708	59.2993	20.0229	33.1931	15064.8	14630.7	67.585	26.608	14847.7	2.54003	1.34484	yes	yes	0.275982	-0.55912
	CCAR1	116.882	138.814	50.3139	81.053	14713.5	14968.6	127.848	65.6835	14841.1	1.94643	0.960829	yes	yes	0.418869
	IREB2	71.7697	61.9947	24.6435	19.2983	14746.7	14882.8	66.8822	21.9709	14814.7	3.04412	1.60603	yes	yes	0.303153	-0.518339
	DIP2B	106.629	74.1241	22.0765	30.1054	14836.9	14792.6	90.3767	26.091	14814.7	3.46391	1.7924	yes	yes	0.433931	-0.362579
	SNX1	88.1741	55.2562	18.4827	27.7896	14665.1	14951.2	71.7152	23.1361	14808.1	3.0997	1.63213	yes	yes	0.328056	-0.484052
	ARHGAP1	82.0225	48.5176	14.3754	40.1405	14694	14913.2	65.27	27.258	14803.6	2.39453	1.25974	yes	yes	0.256776	-0.590445
	RPS26	172.247	122.642	50.8273	73.3337	14549.4	15053.3	147.444	62.0805	14801.4	2.37505	1.24796	yes	yes	0.57673	-0.239027
	AMOTL1	73.8202	26.9542	11.8084	16.2106	14695.7	14880.6	50.3872	14.0095	14788.1	3.59665	1.84665	yes	yes	0.245993	-0.609078
	TRAFD1	123.034	44.4745	16.9424	37.8247	14662.5	14890.4	83.7541	27.3836	14776.4	3.05855	1.61285	yes	yes	0.381489	-0.418518
	LDB1	71.7697	43.1268	16.9424	26.2457	14779.9	14763.2	57.4482	21.5941	14771.6	2.66037	1.41163	yes	yes	0.242724	-0.614887
	ERBIN	106.629	45.8222	24.1301	39.3686	14784.1	14758.9	76.2257	31.7494	14771.5	2.40086	1.26355	yes	yes	0.301095	-0.521296
	PACSIN3	90.2247	41.7791	20.0229	27.7896	14619.1	14905.6	66.0019	23.9062	14762.4	2.76086	1.46512	yes	yes	0.285155	-0.544919
	ABHD2	120.983	66.0379	35.4251	25.4738	14771.4	14749.1	93.5105	30.4494	14760.2	3.07101	1.61871	yes	yes	0.427236	-0.369332
	MIB1	88.1741	43.1268	22.5899	16.9825	14731.4	14783.9	65.6505	19.7862	14757.6	3.31799	1.73031	yes	yes	0.310783	-0.507543
	RAP1B	104.579	68.7333	30.8044	42.4563	14191.4	15315.2	86.656	36.6304	14753.3	2.36569	1.24226	yes	yes	0.339081	-0.469696
	C1QBP	149.691	101.078	59.0418	73.3337	14414.2	15085.9	125.385	66.1877	14750.1	1.89438	0.921725	yes	yes	0.401334
	TBC1D9	82.0225	39.0836	13.862	25.4738	14538.4	14957.7	60.553	19.6679	14748	3.07878	1.62236	yes	yes	0.277224	-0.557169
	JMJD8	114.831	59.2993	24.1301	24.7019	14765.4	14701.3	87.0654	24.416	14733.4	3.56591	1.83427	yes	yes	0.425221	-0.371385
	STEAP3	73.8202	55.2562	20.0229	28.5615	14745.9	14716.5	64.5382	24.2922	14731.2	2.65674	1.40966	yes	yes	0.273203	-0.563515
	SIN3A	77.9213	53.9085	23.1033	32.4212	14642.1	14803.4	65.9149	27.7623	14722.8	2.37426	1.24748	yes	yes	0.25914	-0.586465
	PPP2R5C	112.781	51.213	14.8888	31.6493	14518.8	14919.7	81.997	23.269	14719.2	3.52387	1.81716	yes	yes	0.398987	-0.399041
	CCAR2	108.68	86.2535	32.8581	36.2809	14793.5	14622	97.4667	34.5695	14707.7	2.81944	1.49541	yes	yes	0.427647	-0.368915
	ATP6V1G1	88.1741	55.2562	24.6435	30.1054	14324.9	15082.7	71.7152	27.3745	14703.8	2.61978	1.38945	yes	yes	0.30156	-0.520627
	NUDC	137.388	95.6875	42.0994	66.3863	14253.5	15150	116.538	54.2428	14701.7	2.14844	1.10329	yes	yes	0.423724	-0.372917
	SHANK2	75.8708	37.7359	18.4827	13.1229	15063.9	14334.1	56.8034	15.8028	14699	3.59452	1.8458	yes	yes	0.278934	-0.554498
	UBE2G2	75.8708	47.1699	16.9424	8.49127	14708.4	14682.8	61.5203	12.7169	14695.6	4.8377	2.27432	yes	yes	0.332095	-0.478738
	GASK1B	77.9213	20.2157	11.8084	15.4387	14512	14874.1	49.0685	13.6235	14693	3.60175	1.8487	yes	yes	0.241237	-0.617556
	HOOK2	84.073	33.6928	13.862	19.2983	15117.5	14267.8	58.8829	16.5802	14692.7	3.55141	1.82839	yes	yes	0.287918	-0.540732
	RBM12	131.236	71.4287	24.6435	35.5089	14706.7	14669.8	101.332	30.0762	14688.3	3.36918	1.7524	yes	yes	0.485122	-0.314149
	UQCRFS1	129.185	115.903	41.0726	47.8599	14649.8	14704.6	122.544	44.4662	14677.2	2.7559	1.46252	yes	yes	0.53197	-0.274113
	DNASE2	79.9719	29.6497	10.7816	16.9825	14697.4	14652.4	54.8108	13.882	14674.9	3.94832	1.98124	yes	yes	0.278903	-0.554547
	C8orf33	63.5674	52.5608	23.1033	36.2809	14452.5	14880.6	58.0641	29.6921	14666.5	1.95554	0.967567	yes	yes	0.193447
	WBP11	90.2247	84.9058	31.3178	30.1054	14421.8	14911	87.5653	30.7116	14666.4	2.85121	1.51157	yes	yes	0.387645	-0.411566
	FLOT2	79.9719	40.4313	20.0229	16.2106	14555.4	14769.8	60.2016	18.1167	14662.6	3.32298	1.73248	yes	yes	0.287023	-0.542084
	PJA2	65.618	39.0836	17.4558	21.6141	14366.6	14950.1	52.3508	19.535	14658.3	2.67985	1.42215	yes	yes	0.223871	-0.650002
	CANT1	84.073	57.9516	30.291	27.7896	14492.4	14799.1	71.0123	29.0403	14645.8	2.4453	1.29001	yes	yes	0.286581	-0.542752
	DAP3	100.478	70.081	29.7776	28.5615	14381	14900.1	85.2793	29.1696	14640.6	2.92357	1.54773	yes	yes	0.383248	-0.41652
	VCL	108.68	90.2967	55.9614	47.8599	14698.2	14580.7	99.4882	51.9106	14639.5	1.91653	0.938496	yes	yes	0.324995
	PARP10	55.3652	18.868	3.08044	9.2632	14911.7	14349.3	37.1166	6.17182	14630.5	6.01387	2.58829	yes	yes	0.211509	-0.674672
	PPM1A	94.3258	37.7359	26.1838	26.2457	14316.4	14943.6	66.0309	26.2148	14630	2.51884	1.33276	yes	yes	0.272154	-0.565185
	FAR1	129.185	57.9516	25.157	25.4738	14352.1	14891.4	93.5685	25.3154	14621.8	3.69611	1.88601	yes	yes	0.466791	-0.330878
	LTBP3	73.8202	56.6039	22.5899	23.158	14906.6	14336.3	65.2121	22.874	14621.4	2.85093	1.51143	yes	yes	0.289562	-0.538258
	NCBP2	125.084	55.2562	22.5899	27.0177	14456.7	14764.3	90.1702	24.8038	14610.5	3.63534	1.86209	yes	yes	0.447393	-0.349311
	SUCO	129.185	44.4745	20.5363	30.8773	14580	14631.8	86.8299	25.7068	14605.9	3.3777	1.75604	yes	yes	0.418482	-0.378323
	TOMM70	133.286	60.647	23.1033	38.5967	14393.8	14808.9	96.9668	30.85	14601.3	3.14317	1.65222	yes	yes	0.452813	-0.344081
	PAIP2	98.427	70.081	37.9921	46.316	14302.8	14877.3	84.254	42.1541	14590.1	1.99872	0.999073	yes	yes	0.288552
	CRKL	79.9719	56.6039	23.6167	30.8773	14461	14678.5	68.2879	27.247	14569.7	2.50625	1.32553	yes	yes	0.281686	-0.550235
	NR2C2	73.8202	39.0836	17.4558	18.5264	14474.6	14631.8	56.4519	17.9911	14553.2	3.13777	1.64974	yes	yes	0.264278	-0.577939
	NINJ1	69.7191	25.6065	9.75474	14.6667	14486.5	14617.7	47.6628	12.2107	14552.1	3.90335	1.96471	yes	yes	0.243622	-0.613283
	ADAMTS19	51.264	17.5203	8.72792	6.9474	14519.6	14554.6	34.3921	7.83766	14537.1	4.38806	2.13358	yes	yes	0.182667	-0.738341
	PTPRK	96.3764	53.9085	21.5631	26.2457	14601.3	14472.1	75.1424	23.9044	14536.7	3.14345	1.65235	yes	yes	0.352474	-0.452873
	TNKS2	116.882	59.2993	15.4022	23.9299	14285.8	14779.5	88.0907	19.6661	14532.7	4.47932	2.16328	yes	yes	0.470833	-0.327133
	ELF3	75.8708	39.0836	13.862	15.4387	14768	14271.1	57.4772	14.6503	14519.5	3.92327	1.97206	yes	yes	0.294961	-0.530236
	SLC35E1	86.1236	47.1699	18.9961	20.0703	14437.1	14589.4	66.6467	19.5332	14513.3	3.41198	1.77061	yes	yes	0.324624	-0.488619
	MTMR4	82.0225	45.8222	23.1033	36.2809	14466.9	14552.5	63.9223	29.6921	14509.7	2.15284	1.10624	yes	yes	0.235913	-0.627248
	RNF44	45.1124	33.6928	17.4558	16.9825	14680.4	14289.5	39.4026	17.2192	14485	2.28829	1.19427	yes	yes	0.153148	-0.814889
	RTL8A	77.9213	44.4745	16.9424	20.8422	14346.2	14622	61.1979	18.8923	14484.1	3.2393	1.69568	yes	yes	0.292083	-0.534493
	SCAF1	77.9213	61.9947	23.1033	30.8773	14554.5	14394.9	69.958	26.9903	14474.7	2.59197	1.37405	yes	yes	0.296847	-0.527468
	LRRC41	88.1741	53.9085	20.5363	20.8422	14664.2	14277.6	71.0413	20.6892	14470.9	3.43373	1.77978	yes	yes	0.347954	-0.458478
	HIF1AN	59.4663	33.6928	17.4558	28.5615	14274.7	14647	46.5795	23.0087	14460.9	2.02443	1.01752	yes	yes	0.162998	-0.787819
	GMFB	88.1741	55.2562	28.2374	35.5089	14059.6	14856.7	71.7152	31.8732	14458.1	2.25002	1.16994	yes	yes	0.275568	-0.559771
	SETDB1	79.9719	40.4313	22.5899	24.7019	14515.4	14379.7	60.2016	23.6459	14447.6	2.54597	1.34821	yes	yes	0.253024	-0.596839
	RAB21	79.9719	75.4719	35.4251	36.2809	13792.5	15101.1	77.7219	35.853	14446.8	2.16779	1.11623	yes	yes	0.289814	-0.537881
	MKNK2	49.2135	26.9542	15.9156	12.3509	14594.5	14298.2	38.0839	14.1333	14446.4	2.69462	1.43008	yes	yes	0.16579	-0.780442
	NASP	139.438	83.5581	37.4787	47.0879	14333.4	14556.8	111.498	42.2833	14445.1	2.63693	1.39886	yes	yes	0.479158	-0.319521
	PRKCD	71.7697	35.0405	8.21452	20.0703	14372.5	14487.3	53.4051	14.1424	14429.9	3.77624	1.91695	yes	yes	0.272093	-0.565283
	RCOR1	88.1741	39.0836	17.4558	37.0528	14256.9	14595.9	63.6289	27.2543	14426.4	2.33463	1.2232	yes	yes	0.252139	-0.59836
	ALYREF	108.68	84.9058	54.4212	53.2634	14335.9	14514.4	96.7928	53.8423	14425.2	1.79771	0.84616	yes	yes	0.297747
	EIF2D	69.7191	33.6928	18.9961	21.6141	14433.7	14398.2	51.7059	20.3051	14416	2.54645	1.34849	yes	yes	0.21782	-0.661902
	ATP11B	86.1236	52.5608	13.862	13.8948	14114.8	14690.4	69.3422	13.8784	14402.6	4.99641	2.32089	yes	yes	0.385095	-0.414433
	CREG1	106.629	41.7791	13.3486	26.2457	14230.5	14572	74.2041	19.7972	14401.3	3.74822	1.90621	yes	yes	0.377793	-0.422746
	PARVA	100.478	53.9085	16.429	20.8422	14085.9	14715.4	77.193	18.6356	14400.7	4.14223	2.05041	yes	yes	0.406629	-0.390801
	ANKRD28	108.68	53.9085	20.5363	27.7896	14127.6	14657.9	81.2941	24.1629	14392.7	3.36441	1.75035	yes	yes	0.396945	-0.40127
	ACSS3	90.2247	35.0405	10.7816	10.0351	14257.7	14522	62.6326	10.4083	14389.9	6.01754	2.58917	yes	yes	0.362924	-0.440185
	EPS15	100.478	35.0405	24.1301	23.158	14164.2	14611.1	67.759	23.6441	14387.6	2.86579	1.51893	yes	yes	0.306617	-0.513404
	UNC45A	77.9213	59.2993	24.6435	25.4738	14314.7	14456.9	68.6103	25.0587	14385.8	2.73799	1.45312	yes	yes	0.302741	-0.518928
	ENY2	153.792	130.728	49.8005	67.9301	13749.1	15021.8	142.26	58.8653	14385.5	2.4167	1.27304	yes	yes	0.579715	-0.236786
	NRCAM	106.629	57.9516	32.8581	33.1931	14453.3	14313.4	82.2904	33.0256	14383.4	2.49172	1.31714	yes	yes	0.342512	-0.465324
	TAF1	77.9213	49.8653	14.8888	11.579	14216	14521	63.8933	13.2339	14368.5	4.828	2.27143	yes	yes	0.352573	-0.452751
	NOP56	127.135	92.9921	49.8005	45.5441	14341	14376.5	110.063	47.6723	14358.7	2.30875	1.20711	yes	yes	0.434517	-0.361993
	WSB2	90.2247	68.7333	24.6435	37.8247	14176.1	14512.3	79.479	31.2341	14344.2	2.54462	1.34745	yes	yes	0.336338	-0.473224
	PHF10	123.034	48.5176	18.9961	26.2457	14007.7	14679.6	85.7757	22.6209	14343.6	3.79188	1.92291	yes	yes	0.440298	-0.356253
	DOP1B	79.9719	44.4745	18.9961	18.5264	14443.1	14240.6	62.2232	18.7612	14341.9	3.31658	1.7297	yes	yes	0.303042	-0.518497
	PPP1R12A	100.478	49.8653	20.5363	33.1931	14238.1	14438.4	75.1714	26.8647	14338.3	2.79815	1.48447	yes	yes	0.336908	-0.472489
	RBM5	79.9719	36.3882	14.3754	18.5264	14452.5	14199.4	58.1801	16.4509	14325.9	3.53659	1.82236	yes	yes	0.291285	-0.535682
	SEC22B	90.2247	57.9516	20.0229	16.2106	13900.5	14738.3	74.0882	18.1167	14319.4	4.08949	2.03192	yes	yes	0.390879	-0.407958
	MAPKAP1	82.0225	72.7764	22.0765	37.8247	14080.8	14547	77.3994	29.9506	14313.9	2.58423	1.36974	yes	yes	0.331487	-0.479533
	STK25	84.073	40.4313	23.6167	24.7019	14469.5	14146.1	62.2522	24.1593	14307.8	2.57674	1.36555	yes	yes	0.266239	-0.574729
	ZNF638	79.9719	48.5176	16.429	23.9299	14180.3	14434	64.2448	20.1795	14307.2	3.18367	1.67069	yes	yes	0.307994	-0.511457
	UTP18	94.3258	67.3856	21.0497	29.3335	13952.4	14658.9	80.8557	25.1916	14305.7	3.20963	1.68241	yes	yes	0.389105	-0.409933
	PLK1	123.034	63.3424	23.1033	33.1931	14165.9	14441.6	93.1881	28.1482	14303.7	3.31062	1.7271	yes	yes	0.454705	-0.34227
	IMPAD1	100.478	94.3398	33.3715	37.0528	14205	14381.9	97.4087	35.2121	14293.4	2.76634	1.46798	yes	yes	0.435141	-0.36137
	ALCAM	94.3258	49.8653	16.429	25.4738	14040.8	14541.6	72.0956	20.9514	14291.2	3.44108	1.78286	yes	yes	0.357871	-0.446273
	LY6E	120.983	71.4287	20.0229	36.2809	14029.8	14542.7	96.2059	28.1519	14286.2	3.41739	1.77289	yes	yes	0.476361	-0.322064
	MRPL41	88.1741	63.3424	26.1838	32.4212	14224.5	14336.3	75.7583	29.3025	14280.4	2.58539	1.37038	yes	yes	0.325312	-0.4877
	NT5C2	94.3258	97.0352	29.7776	23.9299	14063.8	14492.7	95.6805	26.8538	14278.3	3.56302	1.8331	yes	yes	0.482039	-0.316918
	BTG1	65.618	35.0405	15.4022	16.9825	13842.7	14699.1	50.3292	16.1924	14270.9	3.10821	1.63608	yes	yes	0.239206	-0.621228
	BBX	59.4663	40.4313	15.9156	23.9299	14065.5	14464.5	49.9488	19.9228	14265	2.50712	1.32603	yes	yes	0.210488	-0.676773
	SMC3	82.0225	60.647	25.157	37.0528	13944.7	14577.5	71.3347	31.1049	14261.1	2.29336	1.19746	yes	yes	0.282095	-0.549604
	MON1B	65.618	48.5176	17.4558	16.9825	14409.9	14102.7	57.0678	17.2192	14256.3	3.3142	1.72866	yes	yes	0.279516	-0.553594
	HSPH1	120.983	88.949	49.2871	47.0879	14039.1	14473.1	104.966	48.1875	14256.1	2.17828	1.12319	yes	yes	0.398274	-0.399818
	MON2	92.2753	51.213	22.5899	23.158	14359.8	14133.1	71.7442	22.874	14246.4	3.1365	1.64916	yes	yes	0.343035	-0.464662
	NOL11	110.73	76.8196	31.3178	41.6844	13875	14614.4	93.7749	36.5011	14244.7	2.5691	1.36126	yes	yes	0.402071	-0.395697
	EGR1	94.3258	63.3424	21.0497	23.9299	14933	13556.1	78.8341	22.4898	14244.6	3.50533	1.80955	yes	yes	0.39555	-0.402799
	FXR1	133.286	92.9921	25.6704	46.316	13812.1	14666.5	113.139	35.9932	14239.3	3.14335	1.6523	yes	yes	0.541783	-0.266175
	OGFRL1	82.0225	33.6928	9.24133	18.5264	13989	14478.6	57.8576	13.8839	14233.8	4.16726	2.0591	yes	yes	0.30894	-0.510126
	DTX3L	73.8202	39.0836	10.7816	6.17547	14171.8	14293.9	56.4519	8.47851	14232.8	6.65824	2.73514	yes	yes	0.337061	-0.472291
	PLEKHA6	79.9719	51.213	17.4558	13.8948	14304.5	14159.2	65.5925	15.6753	14231.8	4.18444	2.06504	yes	yes	0.350743	-0.455011
	MRPS25	108.68	68.7333	25.6704	43.2283	14001.7	14438.4	88.7065	34.4493	14220.1	2.57499	1.36457	yes	yes	0.381554	-0.418444
	SUB1	116.882	86.2535	37.9921	39.3686	13898	14532.9	101.568	38.6804	14215.4	2.62582	1.39277	yes	yes	0.442388	-0.354197
	NDUFA4	141.489	95.6875	41.0726	37.8247	14016.2	14406.9	118.588	39.4487	14211.5	3.00614	1.58791	yes	yes	0.556868	-0.254248
	OPA1	77.9213	66.0379	26.1838	29.3335	13805.3	14614.4	71.9796	27.7586	14209.8	2.59305	1.37465	yes	yes	0.3112	-0.50696
	ALDH5A1	116.882	41.7791	17.4558	17.7545	14056.2	14347.1	79.3305	17.6052	14201.6	4.5061	2.17188	yes	yes	0.434636	-0.361875
	DOCK5	112.781	60.647	33.3715	27.7896	14492.4	13895.1	86.714	30.5805	14193.8	2.83559	1.50365	yes	yes	0.395479	-0.402877
	STK38	73.8202	66.0379	22.0765	24.7019	13828.2	14541.6	69.929	23.3892	14184.9	2.9898	1.58005	yes	yes	0.328094	-0.484002
	SAE1	118.933	86.2535	50.8273	43.2283	13738.9	14627.4	102.593	47.0278	14183.2	2.18154	1.12535	yes	yes	0.391769	-0.40697
	ODC1	129.185	118.599	47.2335	62.5266	13879.3	14484	123.892	54.88	14181.6	2.25751	1.17473	yes	yes	0.486629	-0.312802
	NOP58	127.135	67.3856	31.8312	55.5792	13790	14569.8	97.2602	43.7052	14179.9	2.22537	1.15404	yes	yes	0.377682	-0.422873
	RABL6	59.4663	53.9085	21.0497	29.3335	14321.5	14032	56.6874	25.1916	14176.8	2.25025	1.17009	yes	yes	0.222165	-0.653324
	BRD7	77.9213	71.4287	34.3983	23.9299	13833.3	14518.8	74.675	29.1641	14176.1	2.56051	1.35643	yes	yes	0.321041	-0.49344
	BRD3	55.3652	26.9542	10.2681	15.4387	14237.3	14107	41.1597	12.8534	14172.1	3.20224	1.67908	yes	yes	0.199732	-0.699553
	KMT2B	129.185	63.3424	29.7776	31.6493	14586	13757.2	96.2639	30.7134	14171.6	3.13426	1.64812	yes	yes	0.462549	-0.334842
	PSD4	38.9607	26.9542	9.24133	15.4387	14206.7	14094	32.9575	12.34	14150.3	2.67078	1.41726	yes	yes	0.145703	-0.836531
	RARA	90.2247	43.1268	16.429	33.1931	14085.9	14205.9	66.6757	24.8111	14145.9	2.68734	1.42618	yes	yes	0.295949	-0.528783
	NAA60	61.5168	21.5634	15.9156	18.5264	14145.4	14129.8	41.5401	17.221	14137.6	2.41218	1.27034	yes	yes	0.172017	-0.764429
	PIK3C2A	92.2753	57.9516	20.0229	23.9299	14103.8	14155.9	75.1134	21.9764	14129.8	3.41791	1.77312	yes	yes	0.376063	-0.42474
	YIPF3	92.2753	41.7791	14.3754	16.9825	13877.6	14371	67.0272	15.679	14124.3	4.27497	2.09592	yes	yes	0.363545	-0.439441
	EPS8	104.579	47.1699	25.157	30.1054	13768.7	14384.1	75.8743	27.6312	14076.4	2.74597	1.45731	yes	yes	0.342724	-0.465056
	POLR2E	110.73	47.1699	20.5363	21.6141	14154.8	13997.3	78.9501	21.0752	14076	3.74611	1.90539	yes	yes	0.411159	-0.38599
	TXLNA	104.579	55.2562	24.1301	33.1931	14021.3	14100.5	79.9174	28.6616	14060.9	2.78831	1.47939	yes	yes	0.364527	-0.43827
	SNHG16	75.8708	35.0405	15.9156	18.5264	13868.2	14248.2	55.4556	17.221	14058.2	3.22023	1.68716	yes	yes	0.271973	-0.565474
	STAT3	112.781	68.7333	29.2642	40.9125	13887.8	14209.1	90.7571	35.0883	14048.4	2.58653	1.37102	yes	yes	0.396263	-0.402017
	MIDN	71.7697	47.1699	22.5899	27.7896	14310.4	13774.5	59.4698	25.1898	14042.5	2.36087	1.23932	yes	yes	0.244117	-0.612403
	OAS2	75.8708	25.6065	4.10726	10.0351	13911.6	14134.2	50.7386	7.0712	14022.9	7.1754	2.84306	yes	yes	0.311402	-0.506679
	IFIT1	75.8708	26.9542	10.7816	20.0703	13827.4	14212.4	51.4125	15.4259	14019.9	3.33287	1.73676	yes	yes	0.256683	-0.590604
	BAG6	217.36	129.38	53.9078	69.474	12507.5	15529.2	173.37	61.6909	14018.4	2.8103	1.49072	yes	yes	0.796663	-0.0987254
	ZNF131	75.8708	49.8653	18.9961	18.5264	13523.8	14511.2	62.8681	18.7612	14017.5	3.35096	1.74457	yes	yes	0.314656	-0.502164
	PLOD2	127.135	72.7764	22.0765	42.4563	13686.2	14346	99.9556	32.2664	14016.1	3.09782	1.63125	yes	yes	0.482938	-0.316108
	SSR4	104.579	59.2993	31.3178	42.4563	14141.2	13878.8	81.939	36.8871	14010	2.22135	1.15143	yes	yes	0.321569	-0.492726
	ITGB5	120.983	107.817	43.6396	52.4915	13947.3	14058.1	114.4	48.0655	14002.7	2.38008	1.25101	yes	yes	0.473726	-0.324472
	UBE2L3	129.185	70.081	37.4787	54.8073	13585.9	14410.1	99.6332	46.143	13998	2.15923	1.11051	yes	yes	0.382128	-0.417792
	SART3	92.2753	52.5608	23.1033	40.1405	14006	13960.3	72.418	31.6219	13983.1	2.29012	1.19542	yes	yes	0.291752	-0.534987
	RERE	90.2247	37.7359	31.8312	26.2457	14230.5	13723.5	63.9803	29.0385	13977	2.20329	1.13966	yes	yes	0.249996	-0.602068
	MZT2B	77.9213	78.1673	13.862	29.3335	14171	13748.5	78.0443	21.5977	13959.7	3.61354	1.85341	yes	yes	0.404354	-0.393239
	TKFC	55.3652	39.0836	19.5095	16.9825	13945.6	13963.6	47.2244	18.246	13954.6	2.58821	1.37195	yes	yes	0.207662	-0.682643
	EP300	110.73	41.7791	22.5899	28.5615	14647.2	13261.7	76.2547	25.5757	13954.5	2.98153	1.57605	yes	yes	0.363174	-0.439885
	TYMS	147.64	90.2967	38.5055	44.7721	13803.6	14104.8	118.969	41.6388	13954.2	2.85715	1.51458	yes	yes	0.554168	-0.256358
	ZZEF1	77.9213	49.8653	20.0229	33.1931	14225.4	13677.8	63.8933	26.608	13951.6	2.40128	1.2638	yes	yes	0.267247	-0.573086
	DUS1L	129.185	57.9516	31.8312	40.9125	13972	13927.7	93.5685	36.3719	13949.8	2.57255	1.3632	yes	yes	0.410016	-0.387199
	DHTKD1	57.4157	29.6497	11.295	16.2106	13719.4	14161.3	43.5327	13.7528	13940.3	3.16537	1.66238	yes	yes	0.213624	-0.67035
	GNAQ	71.7697	59.2993	24.1301	15.4387	13791.7	14074.4	65.5345	19.7844	13933	3.31243	1.72789	yes	yes	0.328357	-0.483654
	WDR45B	73.8202	40.4313	20.5363	27.7896	13561.2	14276.5	57.1258	24.1629	13918.8	2.36419	1.24135	yes	yes	0.236822	-0.625579
	USP1	131.236	48.5176	22.5899	32.4212	13691.3	14134.2	89.8768	27.5056	13912.7	3.26759	1.70823	yes	yes	0.448303	-0.348428
	IK	106.629	66.0379	23.6167	21.6141	13687.1	14121.1	86.3335	22.6154	13904.1	3.81746	1.93261	yes	yes	0.458269	-0.33888
	AMZ2	100.478	51.213	27.2106	34.737	13733.8	14048.3	75.8453	30.9738	13891.1	2.44869	1.29201	yes	yes	0.323024	-0.490766
	MANEAL	125.084	63.3424	23.1033	50.9476	13920.9	13831	94.2133	37.0255	13876	2.54456	1.34741	yes	yes	0.412136	-0.38496
	MYBL2	176.348	111.86	58.015	81.053	13739.8	14002.7	144.104	69.534	13871.2	2.07243	1.05132	yes	yes	0.537588	-0.26955
	FOXP4	114.831	63.3424	18.4827	27.7896	14112.3	13627.9	89.0869	23.1361	13870.1	3.85056	1.94507	yes	yes	0.47549	-0.322858
	C12orf57	65.618	43.1268	18.4827	23.9299	13707.5	13995.1	54.3724	21.2063	13851.3	2.56397	1.35838	yes	yes	0.239444	-0.620796
	CAMK2D	86.1236	35.0405	14.3754	16.2106	13676.9	14024.4	60.582	15.293	13850.6	3.96142	1.98602	yes	yes	0.326982	-0.485477
	PGAM1	151.742	109.165	53.9078	61.7547	13689.6	13982.1	130.453	57.8312	13835.8	2.25576	1.17361	yes	yes	0.524883	-0.279938
	CACUL1	94.3258	53.9085	19.5095	22.3861	13593.5	14064.6	74.1171	20.9478	13829.1	3.53819	1.82301	yes	yes	0.384475	-0.415131
	VPS28	77.9213	33.6928	9.75474	9.2632	13910.7	13747.4	55.8071	9.50897	13829	5.86889	2.55309	yes	yes	0.334789	-0.475229
	ADAM9	161.994	95.6875	52.3675	57.895	13728.7	13919	128.841	55.1313	13823.9	2.33698	1.22465	yes	yes	0.533205	-0.273106
	TMEM109	82.0225	67.3856	24.1301	43.2283	13785.7	13857.1	74.704	33.6792	13821.4	2.21811	1.14933	yes	yes	0.296821	-0.527506
	TLE1	79.9719	45.8222	23.6167	25.4738	13949	13687.6	62.897	24.5453	13818.3	2.56249	1.35755	yes	yes	0.277543	-0.556669
	CRIP2	110.73	45.8222	25.6704	30.8773	13935.4	13698.5	78.2763	28.2738	13816.9	2.7685	1.46911	yes	yes	0.361892	-0.441421
	PARP9	73.8202	20.2157	8.21452	13.1229	13522.1	14110.3	47.0179	10.6687	13816.2	4.4071	2.13983	yes	yes	0.263092	-0.579892
	MAPK14	69.7191	33.6928	20.0229	27.7896	13708.3	13921.2	51.7059	23.9062	13814.8	2.16286	1.11294	yes	yes	0.201232	-0.696303
	IDH3G	51.264	55.2562	23.1033	24.7019	13898	13715.9	53.2601	23.9026	13806.9	2.22821	1.15589	yes	yes	0.212629	-0.672377
	GTPBP4	104.579	75.4719	30.291	48.6318	13386.9	14213.5	90.0252	39.4614	13800.2	2.28135	1.18989	yes	yes	0.3664	-0.436044
	NF1	108.68	72.7764	25.157	30.8773	14085.9	13512.7	90.7281	28.0171	13799.3	3.23831	1.69524	yes	yes	0.45445	-0.342514
	SYT7	61.5168	43.1268	12.8352	20.8422	13761.9	13836.5	52.3218	16.8387	13799.2	3.10724	1.63563	yes	yes	0.257139	-0.589832
	VPS13B	96.3764	33.6928	11.8084	23.9299	14161.6	13413.8	65.0346	17.8691	13787.7	3.63949	1.86374	yes	yes	0.342083	-0.465868
	RABGAP1	100.478	43.1268	16.9424	28.5615	13615.6	13958.2	71.8021	22.752	13786.9	3.15586	1.65803	yes	yes	0.355774	-0.448826
	ANKLE2	73.8202	70.081	22.5899	29.3335	13878.4	13675.7	71.9506	25.9617	13777	2.77141	1.47062	yes	yes	0.333809	-0.476503
	SLC2A4RG	61.5168	35.0405	14.3754	23.158	13832.5	13709.3	48.2787	18.7667	13770.9	2.57257	1.36321	yes	yes	0.214307	-0.668965
	RPS27L	92.2753	51.213	22.0765	31.6493	13214.2	14327.6	71.7442	26.8629	13770.9	2.67075	1.41725	yes	yes	0.325914	-0.486897
	ZNF219	57.4157	24.2588	14.3754	16.9825	13601.2	13939.7	40.8373	15.679	13770.4	2.60459	1.38106	yes	yes	0.182698	-0.738266
	SUDS3	84.073	44.4745	23.1033	18.5264	13590.1	13915.8	64.2738	20.8149	13752.9	3.08788	1.62662	yes	yes	0.315997	-0.500317
	ARIH1	104.579	55.2562	22.5899	27.0177	13573.9	13901.7	79.9174	24.8038	13737.8	3.22198	1.68795	yes	yes	0.401182	-0.396658
	SLC38A10	86.1236	47.1699	21.5631	35.5089	13891.2	13559.4	66.6467	28.536	13725.3	2.33553	1.22375	yes	yes	0.277668	-0.556474
	IMMT	131.236	90.2967	35.9385	36.2809	13524.6	13882.1	110.766	36.1097	13703.4	3.0675	1.61706	yes	yes	0.544805	-0.263759
	SLTM	131.236	66.0379	41.586	33.1931	13607.1	13798.4	98.6369	37.3896	13702.8	2.63809	1.39949	yes	yes	0.44697	-0.349721
	PDXDC1	116.882	57.9516	26.1838	38.5967	12378.2	15009.9	87.4168	32.3902	13694	2.69886	1.43235	yes	yes	0.401828	-0.395959
	CABIN1	69.7191	47.1699	14.3754	19.2983	14028.1	13322.6	58.4445	16.8369	13675.3	3.47122	1.79544	yes	yes	0.304253	-0.516764
	DNPEP	67.6685	59.2993	20.0229	23.9299	13714.3	13633.3	63.4839	21.9764	13673.8	2.88873	1.53044	yes	yes	0.303555	-0.517762
	GBF1	112.781	56.6039	16.9424	34.737	14108.9	13225.9	84.6924	25.8397	13667.4	3.2776	1.71264	yes	yes	0.430607	-0.365919
	PCNT	77.9213	43.1268	15.4022	20.8422	14229.6	13100.9	60.5241	18.1222	13665.3	3.33977	1.73975	yes	yes	0.310289	-0.508234
	ATL3	86.1236	55.2562	28.2374	27.7896	13619	13710.4	70.6899	28.0135	13664.7	2.52342	1.33538	yes	yes	0.312311	-0.505413
	PTPN1	98.427	51.213	22.5899	33.9651	13360.5	13924.5	74.82	28.2775	13642.5	2.64592	1.40377	yes	yes	0.341159	-0.467044
	CMBL	63.5674	25.6065	10.7816	12.3509	13447.2	13795.2	44.587	11.5662	13621.2	3.85492	1.9467	yes	yes	0.242421	-0.615429
	ZNF687	86.1236	63.3424	17.9693	22.3861	13835.9	13406.2	74.733	20.1777	13621	3.70375	1.88899	yes	yes	0.400522	-0.397373
	SRRM1	102.528	76.8196	28.7508	40.1405	13644.5	13580.1	89.6738	34.4457	13612.3	2.60334	1.38036	yes	yes	0.405723	-0.391771
	RRBP1	139.438	75.4719	36.9653	33.9651	13881	13308.4	107.455	35.4652	13594.7	3.02987	1.59926	yes	yes	0.529544	-0.276098
	ARMCX3	98.427	32.3451	9.75474	13.1229	13414.1	13772.4	65.386	11.4388	13593.2	5.71616	2.51505	yes	yes	0.396869	-0.401353
	COA4	88.1741	63.3424	32.8581	36.2809	13387.7	13783.2	75.7583	34.5695	13585.5	2.19148	1.13191	yes	yes	0.303183	-0.518295
	RTRAF	88.1741	70.081	21.0497	24.7019	13195.5	13933.2	79.1276	22.8758	13564.3	3.45901	1.79036	yes	yes	0.414704	-0.382262
[truncated: 8,433 more rows]

## Sheet: Table 5
	ensembl_gene_id	gene_id	half_life	transfer_%	log10(half life)	log10(transfer%)
	ENSG00000111640	GAPDH	29.4879	0.476559	1.46964	-0.321883
	ENSG00000100142	POLR2F	21.0764	0.373657	1.3238	-0.427527
	ENSG00000127922	SEM1	17.3074	0.310703	1.23823	-0.507654
	ENSG00000114391	RPL24	16.3407	0.431967	1.21327	-0.364549
	ENSG00000083845	RPS5	15.9285	0.349611	1.20217	-0.456415
	ENSG00000198258	UBL5	15.4277	0.316813	1.1883	-0.499196
	ENSG00000138326	RPS24	15.1955	0.39563	1.18172	-0.402711
	ENSG00000197756	RPL37A	14.8637	0.329569	1.17213	-0.482054
	ENSG00000196262	PPIA	13.6321	0.451757	1.13456	-0.345095
	ENSG00000231500	RPS18	13.5945	0.379596	1.13336	-0.420679
	ENSG00000174444	RPL4	13.5527	0.365382	1.13203	-0.437253
	ENSG00000186468	RPS23	13.0941	0.377806	1.11708	-0.422731
	ENSG00000147604	RPL7	12.9502	0.376773	1.11228	-0.42392
	ENSG00000161970	RPL26	12.6689	0.384718	1.10274	-0.414857
	ENSG00000132341	RAN	12.3755	0.415237	1.09256	-0.381704
	ENSG00000133112	TPT1	11.9392	0.356425	1.07698	-0.448032
	ENSG00000168653	NDUFS5	11.875	0.264402	1.07463	-0.577735
	ENSG00000124562	SNRPC	11.4906	0.384297	1.06034	-0.415333
	ENSG00000198918	RPL39	11.3825	0.361544	1.05624	-0.441839
	ENSG00000164587	RPS14	11.3579	0.343365	1.0553	-0.464244
	ENSG00000122406	RPL5	11.1881	0.356679	1.04876	-0.447722
	ENSG00000135940	COX5B	11.1129	0.369105	1.04583	-0.43285
	ENSG00000156467	UQCRB	10.8695	0.412832	1.03621	-0.384226
	ENSG00000108298	RPL19	10.7354	0.41598	1.03082	-0.380928
	ENSG00000133773	CCDC59	10.382	0.406316	1.01628	-0.391136
	ENSG00000145425	RPS3A	10.1336	0.357381	1.00576	-0.446868
	ENSG00000142676	RPL11	10.1054	0.371957	1.00455	-0.429507
	ENSG00000136942	RPL35	10.0519	0.408461	1.00225	-0.388849
	ENSG00000131469	RPL27	10.0451	0.334738	1.00196	-0.475296
	ENSG00000142534	RPS11	10.0258	0.351008	1.00112	-0.454684
	ENSG00000181163	NPM1	9.99493	0.423964	0.99978	-0.372671
	ENSG00000156482	RPL30	9.96447	0.335839	0.998454	-0.473869
	ENSG00000118181	RPS25	9.95486	0.343601	0.998035	-0.463945
	ENSG00000140319	SRP14	9.50987	0.122282	0.978175	-0.912639
	ENSG00000116288	PARK7	9.46492	0.389339	0.976117	-0.409673
	ENSG00000089157	RPLP0	9.46465	0.338924	0.976104	-0.469898
	ENSG00000116161	CACYBP	9.38335	0.399375	0.972358	-0.398619
	ENSG00000277791	PSMB3	9.10035	0.707944	0.959058	-0.150001
	ENSG00000105202	FBL	8.9574	0.4068	0.952182	-0.390619
	ENSG00000144713	RPL32	8.83438	0.406064	0.946176	-0.391405
	ENSG00000125356	NDUFA1	8.79863	0.389928	0.944415	-0.409016
	ENSG00000171863	RPS7	8.75401	0.390859	0.942207	-0.40798
	ENSG00000180817	PPA1	8.74865	0.323634	0.941941	-0.489946
	ENSG00000099817	POLR2E	8.74698	0.411159	0.941858	-0.38599
	ENSG00000113387	SUB1	8.56866	0.442388	0.932913	-0.354197
	ENSG00000115268	RPS15	8.48201	0.381943	0.928499	-0.418002
	ENSG00000221983	UBA52	8.38271	0.317078	0.923385	-0.498834
	ENSG00000099795	NDUFB7	8.37769	0.204559	0.923124	-0.689181
	ENSG00000110492	MDK	8.33388	0.460042	0.920847	-0.337202
	ENSG00000118640	VAMP8	8.19966	0.484208	0.913796	-0.314968
	ENSG00000114942	EEF1B2	8.05483	0.411109	0.906057	-0.386043
	ENSG00000187514	PTMA	7.95319	0.363235	0.900541	-0.439812
	ENSG00000126267	COX6B1	7.85333	0.386594	0.895054	-0.412744
	ENSG00000089009	RPL6	7.80876	0.374274	0.892582	-0.42681
	ENSG00000232112	TMA7	7.76831	0.368729	0.890327	-0.433293
	ENSG00000071082	RPL31	7.72583	0.368056	0.887945	-0.434086
	ENSG00000128534	LSM8	7.67808	0.419368	0.885253	-0.377405
	ENSG00000015475	BID	7.63144	0.513229	0.882607	-0.289689
	ENSG00000198034	RPS4X	7.61367	0.302507	0.881594	-0.519264
	ENSG00000171530	TBCA	7.44613	0.396555	0.871931	-0.401697
	ENSG00000143977	SNRPG	7.42255	0.574794	0.870553	-0.240488
	ENSG00000147677	EIF3H	7.4142	0.392242	0.870064	-0.406446
	ENSG00000111907	TPD52L1	7.38728	0.393453	0.868484	-0.405107
	ENSG00000156508	EEF1A1	7.37622	0.335218	0.867834	-0.474673
	ENSG00000131828	PDHA1	7.33104	0.42453	0.865166	-0.372092
	ENSG00000136930	PSMB7	7.28593	0.375359	0.862485	-0.425553
	ENSG00000159377	PSMB4	7.28414	0.332027	0.862378	-0.478827
	ENSG00000164919	COX6C	7.26025	0.427751	0.860951	-0.368809
	ENSG00000147684	NDUFB9	7.12972	0.386102	0.853073	-0.413298
	ENSG00000100316	RPL3	7.05476	0.310146	0.848482	-0.508434
	ENSG00000141759	TXNL4A	7.02549	0.317857	0.846677	-0.497768
	ENSG00000138430	OLA1	6.97431	0.444997	0.843501	-0.351643
	ENSG00000145741	BTF3	6.95853	0.382823	0.842518	-0.417002
	ENSG00000174748	RPL15	6.90485	0.332989	0.839154	-0.47757
	ENSG00000142937	RPS8	6.81193	0.307492	0.83327	-0.512167
	ENSG00000117450	PRDX1	6.80181	0.528674	0.832624	-0.276812
	ENSG00000109475	RPL34	6.73804	0.364278	0.828533	-0.438566
	ENSG00000105401	CDC37	6.70658	0.349684	0.826501	-0.456325
	ENSG00000105372	RPS19	6.68141	0.405234	0.824868	-0.392294
	ENSG00000063177	RPL18	6.65673	0.317894	0.823261	-0.497718
	ENSG00000087302	RTRAF	6.58378	0.414704	0.818475	-0.382262
	ENSG00000197958	RPL12	6.55898	0.376457	0.816837	-0.424284
	ENSG00000164182	NDUFAF2	6.54216	0.318589	0.815721	-0.49677
	ENSG00000204628	RACK1	6.4446	0.367202	0.809196	-0.435095
	ENSG00000161016	RPL8	6.39741	0.348601	0.806004	-0.457671
	ENSG00000115758	ODC1	6.31524	0.486629	0.80039	-0.312802
	ENSG00000135624	CCT7	6.27879	0.454839	0.797876	-0.342142
	ENSG00000149273	RPS3	6.26695	0.350037	0.797056	-0.455886
	ENSG00000123349	PFDN5	6.17148	0.36821	0.790389	-0.433904
	ENSG00000172809	RPL38	6.16123	0.450083	0.789667	-0.346708
	ENSG00000166710	B2M	6.00827	0.384775	0.77875	-0.414793
	ENSG00000198168	SVIP	5.95924	0.396817	0.775191	-0.40141
	ENSG00000118418	HMGN3	5.93704	0.202649	0.77357	-0.693256
	ENSG00000162244	RPL29	5.92979	0.316015	0.773039	-0.500293
	ENSG00000163170	BOLA3	5.92059	0.694249	0.772365	-0.158485
	ENSG00000131143	COX4I1	5.88956	0.277239	0.770083	-0.557145
	ENSG00000089220	PEBP1	5.82537	0.310295	0.765323	-0.508226
	ENSG00000051596	THOC3	5.80239	0.18964	0.763607	-0.722069
	ENSG00000106153	CHCHD2	5.79538	0.273695	0.763082	-0.562733
	ENSG00000103260	METRN	5.7913	0.337837	0.762776	-0.471293
	ENSG00000105193	RPS16	5.76363	0.350602	0.760696	-0.455186
	ENSG00000142507	PSMB6	5.7132	0.353524	0.756879	-0.451581
	ENSG00000164346	NSA2	5.69057	0.404829	0.755156	-0.392728
	ENSG00000008018	PSMB1	5.68083	0.36568	0.754412	-0.436899
	ENSG00000110955	ATP5F1B	5.66265	0.445361	0.75302	-0.351288
	ENSG00000110442	COMMD9	5.60466	0.295863	0.748549	-0.528909
	ENSG00000178104	PDE4DIP	5.58575	0.379596	0.747081	-0.420679
	ENSG00000120533	ENY2	5.56433	0.579715	0.745413	-0.236786
	ENSG00000167088	SNRPD1	5.56415	0.447799	0.745398	-0.348917
	ENSG00000168028	RPSA	5.54148	0.274536	0.743626	-0.561401
	ENSG00000173660	UQCRH	5.54038	0.418744	0.74354	-0.378051
	ENSG00000127184	COX7C	5.52297	0.341191	0.742173	-0.467003
	ENSG00000041357	PSMA4	5.52173	0.399654	0.742075	-0.398316
	ENSG00000168291	PDHB	5.48636	0.247379	0.739284	-0.606637
	ENSG00000177600	RPLP2	5.47967	0.352137	0.738754	-0.453288
	ENSG00000099901	RANBP1	5.47756	0.47212	0.738587	-0.325948
	ENSG00000138385	SSB	5.47156	0.306286	0.738112	-0.513873
	ENSG00000147123	NDUFB11	5.45211	0.323109	0.736565	-0.490651
	ENSG00000111605	CPSF6	5.42151	0.411715	0.73412	-0.385403
	ENSG00000140612	SEC11A	5.38788	0.26534	0.731418	-0.576198
	ENSG00000143947	RPS27A	5.36985	0.391214	0.729962	-0.407586
	ENSG00000130332	LSM7	5.36843	0.233486	0.729848	-0.63174
	ENSG00000167468	GPX4	5.36632	0.251341	0.729677	-0.599736
	ENSG00000111669	TPI1	5.36369	0.462772	0.729463	-0.334633
	ENSG00000174547	MRPL11	5.34319	0.252792	0.7278	-0.597236
	ENSG00000165629	ATP5F1C	5.33171	0.405229	0.726867	-0.392299
	ENSG00000108106	UBE2S	5.3238	0.34129	0.726222	-0.466876
	ENSG00000110696	C11orf58	5.31496	0.394836	0.7255	-0.403583
	ENSG00000097021	ACOT7	5.30105	0.500654	0.724362	-0.300462
	ENSG00000107223	EDF1	5.28399	0.278872	0.722962	-0.554595
	ENSG00000125691	RPL23	5.27785	0.448604	0.722457	-0.348137
	ENSG00000065978	YBX1	5.26107	0.482048	0.721074	-0.31691
	ENSG00000154518	ATP5MC3	5.20323	0.396466	0.716273	-0.401794
	ENSG00000177889	UBE2N	5.19892	0.598594	0.715913	-0.222868
	ENSG00000184752	NDUFA12	5.16895	0.420953	0.713402	-0.375767
	ENSG00000172428	COPS9	5.15073	0.448644	0.711869	-0.348098
	ENSG00000115128	SF3B6	5.07182	0.446084	0.705164	-0.350583
	ENSG00000149100	EIF3M	5.0592	0.270843	0.704082	-0.567282
	ENSG00000074201	CLNS1A	5.04867	0.37747	0.703177	-0.423117
	ENSG00000184220	CMSS1	5.0435	0.55855	0.702732	-0.252938
	ENSG00000154723	ATP5PF	5.02449	0.413123	0.701092	-0.383921
	ENSG00000197448	GSTK1	5.00517	0.318221	0.699419	-0.497272
	ENSG00000116459	ATP5PB	4.99384	0.451949	0.698435	-0.344911
	ENSG00000147403	RPL10	4.96117	0.328624	0.695584	-0.483301
	ENSG00000261236	BOP1	4.94317	0.492094	0.694005	-0.307952
	ENSG00000014641	MDH1	4.91953	0.536958	0.691924	-0.27006
	ENSG00000172757	CFL1	4.915	0.328412	0.691524	-0.48358
	ENSG00000110700	RPS13	4.88551	0.383105	0.688909	-0.416682
	ENSG00000123131	PRDX4	4.87045	0.409866	0.687569	-0.387358
	ENSG00000163468	CCT3	4.86988	0.421958	0.687518	-0.374731
	ENSG00000105640	RPL18A	4.86664	0.343338	0.687229	-0.464278
	ENSG00000142541	RPL13A	4.86431	0.378435	0.687021	-0.422008
	ENSG00000100911	PSME2	4.82778	0.223375	0.683748	-0.650965
	ENSG00000169567	HINT1	4.82094	0.455712	0.683131	-0.341309
	ENSG00000182899	RPL35A	4.80485	0.383285	0.68168	-0.416479
	ENSG00000092199	HNRNPC	4.80225	0.445098	0.681445	-0.351544
	ENSG00000136521	NDUFB5	4.80177	0.38648	0.681401	-0.412873
	ENSG00000137154	RPS6	4.78757	0.414209	0.680115	-0.382781
	ENSG00000004779	NDUFAB1	4.76878	0.397982	0.678408	-0.400137
	ENSG00000152234	ATP5F1A	4.74639	0.400308	0.676363	-0.397605
	ENSG00000276550	HERC2P2	4.71686	0.448721	0.673653	-0.348024
	ENSG00000165704	HPRT1	4.69945	0.580291	0.672047	-0.236354
	ENSG00000163682	RPL9	4.6852	0.386663	0.670728	-0.412668
	ENSG00000144381	HSPD1	4.66414	0.448571	0.668771	-0.348169
	ENSG00000188846	RPL14	4.64314	0.358255	0.666811	-0.445808
	ENSG00000147669	POLR2K	4.63067	0.424022	0.665644	-0.372612
	ENSG00000123144	TRIR	4.62501	0.350905	0.665113	-0.45481
	ENSG00000142168	SOD1	4.62452	0.492842	0.665067	-0.307292
	ENSG00000148484	RSU1	4.5592	0.386792	0.658889	-0.412523
	ENSG00000127837	AAMP	4.55571	0.350524	0.658556	-0.455282
	ENSG00000172172	MRPL13	4.5547	0.378102	0.65846	-0.422391
	ENSG00000181610	MRPS23	4.55301	0.408147	0.658299	-0.389183
	ENSG00000183648	NDUFB1	4.53962	0.32492	0.65702	-0.488223
	ENSG00000156411	ATP5MPL	4.52416	0.339361	0.655538	-0.469338
	ENSG00000138442	WDR12	4.49838	0.501406	0.653056	-0.29981
	ENSG00000140350	ANP32A	4.49455	0.37569	0.652686	-0.42517
	ENSG00000178741	COX5A	4.48832	0.400035	0.652084	-0.397902
	ENSG00000169230	PRELID1	4.43984	0.398675	0.647368	-0.399381
	ENSG00000106400	ZNHIT1	4.42412	0.452321	0.645827	-0.344553
	ENSG00000198242	RPL23A	4.41379	0.380605	0.644812	-0.419526
	ENSG00000130520	LSM4	4.40942	0.357747	0.644381	-0.446424
	ENSG00000104852	SNRNP70	4.40868	0.292934	0.644309	-0.53323
	ENSG00000131171	SH3BGRL	4.38257	0.322603	0.641729	-0.491331
	ENSG00000173915	ATP5MD	4.36568	0.459897	0.640052	-0.337339
	ENSG00000114631	PODXL2	4.33944	0.377331	0.637433	-0.423277
	ENSG00000004455	AK2	4.33359	0.464844	0.636848	-0.332693
	ENSG00000198612	COPS8	4.32633	0.794779	0.63612	-0.0997534
	ENSG00000132507	EIF5A	4.31674	0.449872	0.635156	-0.346911
	ENSG00000103811	CTSH	4.29152	0.202702	0.632611	-0.693142
	ENSG00000103018	CYB5B	4.29008	0.536321	0.632465	-0.270576
	ENSG00000213339	QTRT1	4.25549	0.337183	0.62895	-0.472134
	ENSG00000100300	TSPO	4.22258	0.502709	0.625578	-0.298683
	ENSG00000197345	MRPL21	4.21954	0.49407	0.625265	-0.306212
	ENSG00000168002	POLR2G	4.19147	0.350368	0.622367	-0.455476
	ENSG00000134248	LAMTOR5	4.15808	0.377784	0.618893	-0.422756
	ENSG00000078668	VDAC3	4.15278	0.539034	0.618339	-0.268384
	ENSG00000109971	HSPA8	4.07965	0.637013	0.610623	-0.195852
	ENSG00000143198	MGST3	4.07904	0.833857	0.610558	-0.0789086
	ENSG00000165775	FUNDC2	4.07619	0.336471	0.610255	-0.473052
	ENSG00000108953	YWHAE	4.07569	0.552446	0.610201	-0.25771
	ENSG00000182718	ANXA2	4.05061	0.884882	0.60752	-0.0531144
	ENSG00000119812	FAM98A	4.01538	1.20206	0.603726	0.0799246
	ENSG00000168090	COPS6	4.00768	0.401915	0.602893	-0.395866
	ENSG00000156261	CCT8	3.96292	0.430053	0.598016	-0.366478
	ENSG00000125743	SNRPD2	3.95708	0.35531	0.597375	-0.449392
	ENSG00000089693	MLF2	3.94652	0.30054	0.596214	-0.522098
	ENSG00000119888	EPCAM	3.94109	0.331372	0.595616	-0.479685
	ENSG00000087191	PSMC5	3.9363	0.375888	0.595088	-0.424941
	ENSG00000175416	CLTB	3.90766	0.387256	0.591916	-0.412001
	ENSG00000196683	TOMM7	3.89464	0.350256	0.590468	-0.455615
	ENSG00000167085	PHB	3.86427	0.415377	0.587068	-0.381558
	ENSG00000088832	FKBP1A	3.8566	0.237487	0.586204	-0.62436
	ENSG00000074800	ENO1	3.85053	0.546419	0.585521	-0.262474
	ENSG00000125835	SNRPB	3.83582	0.519725	0.583858	-0.284226
	ENSG00000100632	ERH	3.83115	0.399837	0.58333	-0.398117
	ENSG00000100567	PSMA3	3.83019	0.494505	0.583221	-0.305829
	ENSG00000112335	SNX3	3.81772	0.394024	0.581804	-0.404478
	ENSG00000139684	ESD	3.80644	0.45216	0.580518	-0.344708
	ENSG00000143742	SRP9	3.80591	0.404614	0.580459	-0.392959
	ENSG00000137309	HMGA1	3.79583	0.248381	0.579306	-0.604881
	ENSG00000187109	NAP1L1	3.78613	0.286799	0.578196	-0.542422
	ENSG00000112306	RPS12	3.76887	0.337364	0.576211	-0.471902
	ENSG00000196419	XRCC6	3.76619	0.377225	0.575902	-0.423399
	ENSG00000111237	VPS29	3.75462	0.510974	0.574566	-0.291601
	ENSG00000132676	DAP3	3.75077	0.383248	0.57412	-0.41652
	ENSG00000103769	RAB11A	3.74481	0.374929	0.57343	-0.426051
	ENSG00000064490	RFXANK	3.72608	0.331888	0.571252	-0.479009
	ENSG00000143183	TMCO1	3.71596	0.323993	0.570071	-0.489465
	ENSG00000111144	LTA4H	3.71135	0.340363	0.569532	-0.468058
	ENSG00000165119	HNRNPK	3.70807	0.74898	0.569148	-0.12553
	ENSG00000102172	SMS	3.6904	0.310332	0.567073	-0.508174
	ENSG00000088986	DYNLL1	3.67363	0.509772	0.565096	-0.292624
	ENSG00000150753	CCT5	3.67125	0.287999	0.564814	-0.540609
	ENSG00000135404	CD63	3.66232	0.451469	0.563756	-0.345372
	ENSG00000140995	DEF8	3.66087	0.285834	0.563585	-0.543886
	ENSG00000125970	RALY	3.66008	0.330329	0.563491	-0.481053
	ENSG00000117691	NENF	3.65267	0.658868	0.562611	-0.181201
	ENSG00000187840	EIF4EBP1	3.64958	0.289977	0.562242	-0.537637
	ENSG00000126602	TRAP1	3.63579	0.291965	0.560598	-0.534669
	ENSG00000254999	BRK1	3.63572	0.251251	0.56059	-0.599892
	ENSG00000103363	ELOB	3.62984	0.339637	0.559887	-0.468985
	ENSG00000198015	MRPL42	3.61086	0.312902	0.55761	-0.504592
	ENSG00000013306	SLC25A39	3.60959	0.248458	0.557458	-0.604748
	ENSG00000116898	MRPS15	3.60367	0.292513	0.556744	-0.533855
	ENSG00000125503	PPP1R12C	3.58447	0.327848	0.554425	-0.484328
	ENSG00000119487	MAPKAP1	3.58172	0.331487	0.554092	-0.479533
	ENSG00000143774	GUK1	3.58108	0.327039	0.554014	-0.4854
	ENSG00000101132	PFDN4	3.56197	0.316857	0.55169	-0.499137
	ENSG00000128050	PAICS	3.55114	0.364466	0.550368	-0.438343
	ENSG00000145494	NDUFS6	3.5425	0.407641	0.549309	-0.389722
	ENSG00000166451	CENPN	3.53901	0.235569	0.548882	-0.627882
	ENSG00000088448	ANKRD10	3.53009	0.155313	0.547786	-0.808791
	ENSG00000117395	EBNA1BP2	3.51934	0.22176	0.546462	-0.654117
	ENSG00000151465	CDC123	3.51797	0.406881	0.546292	-0.390533
	ENSG00000130638	ATXN10	3.51358	0.418105	0.54575	-0.378714
	ENSG00000128524	ATP6V1F	3.5026	0.324384	0.544391	-0.488941
	ENSG00000100129	EIF3L	3.4923	0.472481	0.543112	-0.325616
	ENSG00000116670	MAD2L2	3.48625	0.421518	0.542359	-0.375184
	ENSG00000143420	ENSA	3.48611	0.360475	0.542342	-0.443125
	ENSG00000084623	EIF3I	3.47198	0.389472	0.540577	-0.409524
	ENSG00000106603	COA1	3.4644	0.254464	0.539628	-0.594374
	ENSG00000112695	COX7A2	3.44922	0.43829	0.53772	-0.358238
	ENSG00000213585	VDAC1	3.40814	0.468551	0.532517	-0.329243
	ENSG00000106355	LSM5	3.40655	0.318809	0.532315	-0.49647
	ENSG00000037241	RPL26L1	3.40194	0.520965	0.531727	-0.283192
	ENSG00000075336	TIMM21	3.3909	0.649907	0.530316	-0.187149
	ENSG00000132646	PCNA	3.39026	0.644583	0.530233	-0.190721
	ENSG00000130414	NDUFA10	3.35706	0.214816	0.525959	-0.667933
	ENSG00000197894	ADH5	3.34904	0.393588	0.524921	-0.404958
	ENSG00000178952	TUFM	3.34894	0.351049	0.524907	-0.454632
	ENSG00000096384	HSP90AB1	3.34097	0.445985	0.523872	-0.35068
	ENSG00000105185	PDCD5	3.33348	0.732527	0.522898	-0.135177
	ENSG00000215021	PHB2	3.32728	0.39368	0.522089	-0.404857
	ENSG00000106367	AP1S1	3.32257	0.304246	0.521475	-0.516775
	ENSG00000168439	STIP1	3.31741	0.41054	0.520799	-0.386645
	ENSG00000150459	SAP18	3.29835	0.380543	0.518297	-0.419596
	ENSG00000114686	MRPL3	3.29633	0.334289	0.518031	-0.475878
	ENSG00000115091	ACTR3	3.28929	0.471098	0.517102	-0.326889
	ENSG00000137818	RPLP1	3.26632	0.412022	0.514058	-0.385079
	ENSG00000112667	DNPH1	3.25964	0.329734	0.513169	-0.481836
	ENSG00000196591	HDAC2	3.24273	0.292087	0.510911	-0.534487
	ENSG00000065057	NTHL1	3.23914	0.358775	0.51043	-0.445178
	ENSG00000101365	IDH3B	3.23625	0.299758	0.510042	-0.523229
	ENSG00000165644	COMTD1	3.22786	0.274187	0.508915	-0.561954
	ENSG00000183527	PSMG1	3.22288	0.307907	0.508244	-0.51158
	ENSG00000118705	RPN2	3.21349	0.401442	0.506977	-0.396377
	ENSG00000160014	CALM3	3.20043	0.368524	0.505208	-0.433535
	ENSG00000117632	STMN1	3.19971	0.381107	0.50511	-0.418953
	ENSG00000162385	MAGOH	3.19885	0.373488	0.504994	-0.427723
	ENSG00000079462	PAFAH1B3	3.19684	0.380522	0.504721	-0.41962
	ENSG00000178982	EIF3K	3.19667	0.576805	0.504697	-0.238971
	ENSG00000159352	PSMD4	3.19245	0.34981	0.504124	-0.456168
	ENSG00000188976	NOC2L	3.19004	0.279846	0.503796	-0.55308
	ENSG00000147224	PRPS1	3.18911	0.423421	0.50367	-0.373227
	ENSG00000112110	MRPL18	3.17631	0.264923	0.501922	-0.576881
	ENSG00000100591	AHSA1	3.17102	0.232018	0.501199	-0.634479
	ENSG00000132780	NASP	3.16849	0.479158	0.500853	-0.319521
	ENSG00000163399	ATP1A1	3.14201	0.418957	0.497207	-0.37783
	ENSG00000128609	NDUFA5	3.13172	0.31182	0.495783	-0.506096
	ENSG00000183291	SELENOF	3.12879	0.500279	0.495377	-0.300788
	ENSG00000140740	UQCRC2	3.1252	0.296211	0.494878	-0.528398
	ENSG00000135972	MRPS9	3.11926	0.301162	0.494052	-0.5212
	ENSG00000143549	TPM3	3.11866	0.479445	0.493968	-0.319261
	ENSG00000170142	UBE2E1	3.11139	0.536471	0.492954	-0.270454
	ENSG00000114054	PCCB	3.10036	0.499293	0.491413	-0.301644
	ENSG00000111843	TMEM14C	3.08465	0.398661	0.489207	-0.399396
	ENSG00000081870	HSPB11	3.08133	0.672721	0.488739	-0.172165
	ENSG00000181019	NQO1	3.07009	0.463011	0.487151	-0.334409
	ENSG00000184990	SIVA1	3.06627	0.297031	0.486611	-0.527198
	ENSG00000169714	CNBP	3.05011	0.573569	0.484315	-0.241415
	ENSG00000091483	FH	3.0399	0.58909	0.482859	-0.229818
	ENSG00000067225	PKM	3.03893	0.504958	0.482721	-0.296745
	ENSG00000104341	LAPTM4B	3.02824	0.321395	0.48119	-0.492961
	ENSG00000084234	APLP2	3.00585	0.357002	0.477967	-0.447329
	ENSG00000126453	BCL2L12	3.00005	0.548818	0.477128	-0.260571
	ENSG00000165609	NUDT5	2.9956	0.253693	0.476484	-0.595692
	ENSG00000172270	BSG	2.98954	0.313182	0.475604	-0.504203
	ENSG00000143222	UFC1	2.98773	0.385903	0.475341	-0.413521
	ENSG00000065150	IPO5	2.98607	0.431214	0.475099	-0.365307
	ENSG00000080824	HSP90AA1	2.98605	0.50072	0.475097	-0.300405
	ENSG00000175265	GOLGA8A	2.9808	0.345273	0.474332	-0.461837
	ENSG00000184428	TOP1MT	2.97758	0.303905	0.473864	-0.517262
	ENSG00000148341	SH3GLB2	2.97586	0.279166	0.473612	-0.554138
	ENSG00000173272	MZT2A	2.97497	0.274919	0.473482	-0.560795
	ENSG00000198755	RPL10A	2.9655	0.336113	0.472098	-0.473515
	ENSG00000172531	PPP1CA	2.96336	0.440486	0.471785	-0.356068
	ENSG00000183726	TMEM50A	2.9599	0.259095	0.471278	-0.586541
	ENSG00000131495	NDUFA2	2.95839	0.288599	0.471055	-0.539706
	ENSG00000075239	ACAT1	2.94877	0.335795	0.469641	-0.473925
	ENSG00000169288	MRPL1	2.93507	0.346781	0.467618	-0.459944
	ENSG00000166226	CCT2	2.93503	0.40512	0.467612	-0.392417
	ENSG00000205581	HMGN1	2.93443	0.292146	0.467523	-0.5344
	ENSG00000102054	RBBP7	2.93227	0.296189	0.467204	-0.52843
	ENSG00000057608	GDI2	2.92757	0.342906	0.466507	-0.464826
	ENSG00000007080	CCDC124	2.92256	0.363376	0.465763	-0.439644
	ENSG00000067560	RHOA	2.90867	0.630413	0.463695	-0.200375
	ENSG00000101444	AHCY	2.89156	0.319886	0.461133	-0.495005
	ENSG00000163466	ARPC2	2.88118	0.400407	0.459571	-0.397498
	ENSG00000125868	DSTN	2.8796	0.487237	0.459333	-0.31226
	ENSG00000169299	PGM2	2.87895	0.684439	0.459235	-0.164665
	ENSG00000167645	YIF1B	2.87565	0.331931	0.458736	-0.478952
	ENSG00000105373	NOP53	2.87393	0.224701	0.458476	-0.648395
	ENSG00000180879	SSR4	2.8736	0.321569	0.458427	-0.492726
	ENSG00000198668	CALM1	2.86948	0.310201	0.457803	-0.508357
	ENSG00000142892	PIGK	2.85718	0.385764	0.455938	-0.413678
	ENSG00000010256	UQCRC1	2.85596	0.522871	0.455751	-0.281606
	ENSG00000128699	ORMDL1	2.85583	0.274501	0.455733	-0.561456
	ENSG00000169139	UBE2V2	2.84733	0.469642	0.454438	-0.328233
	ENSG00000082515	MRPL22	2.84684	0.489603	0.454363	-0.310156
	ENSG00000265354	TIMM23	2.84508	0.432861	0.454095	-0.363652
	ENSG00000116478	HDAC1	2.84407	0.353906	0.45394	-0.451112
	ENSG00000066583	ISOC1	2.84118	0.280267	0.453499	-0.552428
	ENSG00000111906	HDDC2	2.83611	0.53208	0.452723	-0.274023
	ENSG00000126088	UROD	2.82695	0.518074	0.451319	-0.285608
	ENSG00000163931	TKT	2.82649	0.473843	0.451247	-0.324366
	ENSG00000106591	MRPL32	2.82329	0.51409	0.450756	-0.288961
	ENSG00000142864	SERBP1	2.816	0.331039	0.449632	-0.480121
	ENSG00000153140	CETN3	2.81551	0.24965	0.449558	-0.602669
	ENSG00000125944	HNRNPR	2.8063	0.530103	0.448135	-0.27564
	ENSG00000185787	MORF4L1	2.80438	0.485836	0.447836	-0.31351
	ENSG00000187051	RPS19BP1	2.79533	0.384032	0.446433	-0.415633
	ENSG00000110711	AIP	2.79113	0.310489	0.445781	-0.507953
	ENSG00000127445	PIN1	2.78592	0.302872	0.444968	-0.51874
	ENSG00000143727	ACP1	2.78225	0.404436	0.444396	-0.39315
	ENSG00000084733	RAB10	2.781	0.37718	0.444201	-0.423452
	ENSG00000131467	PSME3	2.77887	0.86244	0.443868	-0.0642711
	ENSG00000166902	MRPL16	2.77824	0.409608	0.44377	-0.387632
	ENSG00000130706	ADRM1	2.76434	0.394184	0.441591	-0.404301
	ENSG00000100823	APEX1	2.76093	0.317275	0.441056	-0.498564
	ENSG00000142230	SAE1	2.75915	0.391769	0.440775	-0.40697
	ENSG00000121316	PLBD1	2.75765	0.229589	0.440539	-0.639048
	ENSG00000132313	MRPL35	2.7511	0.296893	0.439507	-0.5274
	ENSG00000183207	RUVBL2	2.7511	0.486181	0.439506	-0.313202
	ENSG00000126432	PRDX5	2.73808	0.16794	0.437446	-0.774845
	ENSG00000164934	DCAF13	2.7166	0.507477	0.434025	-0.294584
	ENSG00000100764	PSMC1	2.70948	0.56476	0.432887	-0.248136
	ENSG00000163541	SUCLG1	2.7048	0.338798	0.432135	-0.470059
	ENSG00000075785	RAB7A	2.7048	0.396153	0.432135	-0.402137
	ENSG00000136261	BZW2	2.69902	0.463631	0.431207	-0.333828
	ENSG00000071462	BUD23	2.69329	0.380429	0.430282	-0.419726
	ENSG00000111142	METAP2	2.68218	0.362991	0.428487	-0.440104
	ENSG00000109332	UBE2D3	2.67999	1.60849	0.428133	0.206419
	ENSG00000213593	TMX2	2.67599	0.657965	0.427485	-0.181797
	ENSG00000152795	HNRNPDL	2.6728	0.533065	0.426966	-0.27322
	ENSG00000135046	ANXA1	2.67089	14.8017	0.426655	1.17031
	ENSG00000122034	GTF3A	2.66571	0.377259	0.425813	-0.42336
	ENSG00000070756	PABPC1	2.65661	0.415349	0.424328	-0.381586
	ENSG00000179958	DCTPP1	2.65591	0.619471	0.424213	-0.207979
	ENSG00000127483	HP1BP3	2.65222	0.258235	0.42361	-0.587986
	ENSG00000107937	GTPBP4	2.6512	0.3664	0.423442	-0.436044
	ENSG00000136522	MRPL47	2.6485	0.318958	0.423	-0.496266
	ENSG00000086061	DNAJA1	2.64497	0.461193	0.422421	-0.336118
	ENSG00000106615	RHEB	2.64456	0.3909	0.422353	-0.407934
	ENSG00000205302	SNX2	2.64012	0.397351	0.421624	-0.400825
	ENSG00000155115	GTF3C6	2.6384	0.743019	0.42134	-0.129
	ENSG00000103365	GGA2	2.61025	0.350047	0.416683	-0.455874
	ENSG00000167658	EEF2	2.60593	0.258873	0.415963	-0.586914
	ENSG00000065154	OAT	2.6058	0.320829	0.415942	-0.493727
	ENSG00000023734	STRAP	2.60437	0.519872	0.415703	-0.284103
	ENSG00000101856	PGRMC1	2.60152	0.453515	0.415228	-0.343408
	ENSG00000134291	TMEM106C	2.59765	0.314314	0.414581	-0.502636
	ENSG00000119655	NPC2	2.59405	0.324121	0.413978	-0.489292
	ENSG00000196230	TUBB	2.59342	0.516053	0.413873	-0.287306
	ENSG00000130811	EIF3G	2.59301	0.264079	0.413804	-0.578265
	ENSG00000173692	PSMD1	2.59298	0.698328	0.4138	-0.155941
	ENSG00000183520	UTP11	2.59258	0.43319	0.413733	-0.363322
	ENSG00000102898	NUTF2	2.59037	0.323717	0.413363	-0.489834
	ENSG00000158710	TAGLN2	2.58319	0.51835	0.412156	-0.285377
	ENSG00000175792	RUVBL1	2.57584	0.322733	0.410919	-0.491157
	ENSG00000108651	UTP6	2.57316	0.319241	0.410467	-0.495882
	ENSG00000189306	RRP7A	2.56481	0.402198	0.409055	-0.39556
	ENSG00000169223	LMAN2	2.5613	0.260069	0.408461	-0.584912
	ENSG00000182628	SKA2	2.56098	0.48392	0.408407	-0.315226
	ENSG00000110651	CD81	2.55993	0.448434	0.408228	-0.348301
	ENSG00000147140	NONO	2.55727	0.278045	0.407777	-0.555884
	ENSG00000100865	CINP	2.54471	0.395476	0.405638	-0.402879
	ENSG00000185627	PSMD13	2.54232	0.286226	0.405231	-0.543292
	ENSG00000170606	HSPA4	2.53686	0.500205	0.404297	-0.300852
	ENSG00000120694	HSPH1	2.53644	0.398274	0.404224	-0.399818
	ENSG00000070785	EIF2B3	2.53281	0.657019	0.403602	-0.182422
	ENSG00000126698	DNAJC8	2.53239	0.332362	0.40353	-0.478389
	ENSG00000104723	TUSC3	2.51986	0.311195	0.401376	-0.506967
	ENSG00000230124	ACBD6	2.51677	0.294483	0.400843	-0.53094
	ENSG00000161203	AP2M1	2.51641	0.381401	0.400781	-0.418619
	ENSG00000119421	NDUFA8	2.51563	0.555056	0.400647	-0.255663
	ENSG00000005022	SLC25A5	2.51494	0.354441	0.400527	-0.450456
	ENSG00000163634	THOC7	2.51422	0.351664	0.400403	-0.453872
	ENSG00000123179	EBPL	2.5135	0.224493	0.400278	-0.648796
	ENSG00000162191	UBXN1	2.50974	0.289955	0.399629	-0.537669
	ENSG00000116030	SUMO1	2.50729	0.33428	0.399205	-0.47589
	ENSG00000184900	SUMO3	2.50603	0.4535	0.398986	-0.343423
	ENSG00000170348	TMED10	2.50432	0.335116	0.39869	-0.474805
	ENSG00000134308	YWHAQ	2.50367	0.576883	0.398578	-0.238912
	ENSG00000122026	RPL21	2.50331	0.376193	0.398514	-0.42459
	ENSG00000140263	SORD	2.50285	0.407137	0.398434	-0.390259
	ENSG00000140391	TSPAN3	2.50257	0.507081	0.398386	-0.294922
	ENSG00000125656	CLPP	2.501	0.40845	0.398114	-0.388861
	ENSG00000161542	PRPSAP1	2.49991	0.329729	0.397924	-0.481843
	ENSG00000102103	PQBP1	2.49493	0.285114	0.397058	-0.544981
	ENSG00000089053	ANAPC5	2.49169	0.386713	0.396493	-0.412612
	ENSG00000146731	CCT6A	2.49019	0.351024	0.396232	-0.454663
	ENSG00000197498	RPF2	2.48927	0.365862	0.396072	-0.436683
	ENSG00000152240	HAUS1	2.48894	0.395717	0.396014	-0.402615
	ENSG00000125870	SNRPB2	2.48468	0.30973	0.395271	-0.509017
	ENSG00000002549	LAP3	2.48032	0.344533	0.394508	-0.46277
	ENSG00000137210	TMEM14B	2.47558	0.477749	0.393677	-0.3208
	ENSG00000177156	TALDO1	2.46729	0.512407	0.39222	-0.290385
	ENSG00000143799	PARP1	2.46442	0.288427	0.391715	-0.539965
	ENSG00000175130	MARCKSL1	2.46391	0.385094	0.391625	-0.414433
	ENSG00000114767	RRP9	2.46285	0.687402	0.391438	-0.162789
	ENSG00000132792	CTNNBL1	2.46144	0.386358	0.391189	-0.41301
	ENSG00000100650	SRSF5	2.46007	0.330813	0.390947	-0.480418
	ENSG00000162227	TAF6L	2.45992	0.519521	0.390921	-0.284397
	ENSG00000143486	EIF2D	2.45622	0.21782	0.390267	-0.661902
	ENSG00000122705	CLTA	2.45353	0.310949	0.389791	-0.507311
	ENSG00000144895	EIF2A	2.44841	0.308177	0.388883	-0.5112
	ENSG00000149136	SSRP1	2.44719	0.471789	0.388668	-0.326252
	ENSG00000184076	UQCR10	2.44396	0.49355	0.388093	-0.306669
	ENSG00000166260	COX11	2.44342	0.402983	0.387999	-0.394713
	ENSG00000118363	SPCS2	2.44264	0.330791	0.38786	-0.480446
	ENSG00000001497	LAS1L	2.44124	0.468979	0.387611	-0.328847
	ENSG00000188186	LAMTOR4	2.43998	0.441137	0.387386	-0.355427
	ENSG00000075415	SLC25A3	2.43978	0.375749	0.387351	-0.425102
	ENSG00000143870	PDIA6	2.43844	0.31762	0.387112	-0.498092
	ENSG00000143252	SDHC	2.43234	0.342954	0.386025	-0.464764
	ENSG00000188312	CENPP	2.42387	0.755496	0.384509	-0.121768
	ENSG00000000419	DPM1	2.42293	0.215573	0.384342	-0.666405
	ENSG00000165283	STOML2	2.41883	0.549636	0.383606	-0.259925
	ENSG00000107672	NSMCE4A	2.41024	0.28828	0.38206	-0.540185
	ENSG00000116221	MRPL37	2.40643	0.36073	0.381374	-0.442817
	ENSG00000069998	HDHD5	2.40421	0.234459	0.380972	-0.629933
	ENSG00000075188	NUP37	2.40055	0.393851	0.38031	-0.404668
	ENSG00000087460	GNAS	2.39928	0.335303	0.38008	-0.474563
	ENSG00000272602	ZNF595	2.39771	0.382337	0.379797	-0.417554
	ENSG00000118680	MYL12B	2.39651	0.35872	0.37958	-0.445244
	ENSG00000148908	RGS10	2.38877	0.352569	0.378174	-0.452756
	ENSG00000197746	PSAP	2.38741	0.402447	0.377927	-0.395291
	ENSG00000171204	TMEM126B	2.38702	0.372423	0.377856	-0.428964
	ENSG00000182944	EWSR1	2.38463	0.348883	0.377421	-0.45732
	ENSG00000197728	RPS26	2.37758	0.57673	0.376136	-0.239027
	ENSG00000153574	RPIA	2.36919	0.576236	0.374599	-0.2394
	ENSG00000135486	HNRNPA1	2.367	0.463522	0.374198	-0.33393
	ENSG00000101367	MAPRE1	2.36583	0.365919	0.373983	-0.436615
	ENSG00000185825	BCAP31	2.35812	0.304046	0.372566	-0.51706
	ENSG00000042753	AP2S1	2.35611	0.529394	0.372196	-0.276221
	ENSG00000099341	PSMD8	2.35499	0.456014	0.37199	-0.341022
	ENSG00000156709	AIFM1	2.34718	0.302368	0.370546	-0.519465
	ENSG00000128463	EMC4	2.34648	0.338475	0.370418	-0.470473
	ENSG00000165916	PSMC3	2.34408	0.448154	0.369972	-0.348573
	ENSG00000121691	CAT	2.34399	0.332107	0.369955	-0.478721
	ENSG00000149089	APIP	2.34235	0.399809	0.369651	-0.398147
	ENSG00000182220	ATP6AP2	2.34035	0.264773	0.36928	-0.577126
	ENSG00000167553	TUBA1C	2.33922	0.547936	0.369071	-0.26127
	ENSG00000156928	MALSU1	2.33867	0.422772	0.368968	-0.373894
	ENSG00000144848	ATG3	2.33768	0.483009	0.368785	-0.316045
	ENSG00000171490	RSL1D1	2.33638	0.388547	0.368543	-0.410556
	ENSG00000079785	DDX1	2.32877	0.439424	0.367126	-0.357116
	ENSG00000105669	COPE	2.32831	0.342753	0.367042	-0.465019
	ENSG00000141425	RPRD1A	2.32605	0.292299	0.366618	-0.534173
	ENSG00000091140	DLD	2.32224	0.293509	0.365908	-0.532379
	ENSG00000106628	POLD2	2.32043	0.471118	0.365569	-0.32687
	ENSG00000065518	NDUFB4	2.3201	0.386177	0.365507	-0.413213
	ENSG00000185088	RPS27L	2.31951	0.325914	0.365396	-0.486897
	ENSG00000156515	HK1	2.31644	0.299349	0.364821	-0.523822
	ENSG00000119616	FCF1	2.31463	0.183973	0.364481	-0.735246
	ENSG00000149547	EI24	2.31256	0.351581	0.364093	-0.453975
	ENSG00000140983	RHOT2	2.30991	0.304229	0.363595	-0.516799
	ENSG00000136518	ACTL6A	2.30901	0.376286	0.363426	-0.424482
	ENSG00000169727	GPS1	2.30715	0.476977	0.363076	-0.321503
	ENSG00000152558	TMEM123	2.30207	0.406511	0.362118	-0.390927
	ENSG00000143653	SCCPDH	2.30142	0.650217	0.361996	-0.186942
	ENSG00000177697	CD151	2.29755	0.360828	0.361265	-0.442699
	ENSG00000120963	ZNF706	2.29714	0.37563	0.361187	-0.425239
	ENSG00000138663	COPS4	2.29044	0.36999	0.35992	-0.43181
	ENSG00000165672	PRDX3	2.28716	0.309001	0.359296	-0.51004
	ENSG00000181817	LSM10	2.28014	0.411112	0.357961	-0.38604
	ENSG00000176890	TYMS	2.27653	0.554168	0.357274	-0.256358
	ENSG00000103415	HMOX2	2.27	0.234082	0.356025	-0.630632
	ENSG00000104825	NFKBIB	2.26823	0.632793	0.355686	-0.198739
	ENSG00000170421	KRT8	2.26418	0.383139	0.35491	-0.416644
	ENSG00000126768	TIMM17B	2.26102	0.38541	0.354304	-0.414077
	ENSG00000116791	CRYZ	2.25982	0.469136	0.354074	-0.328702
	ENSG00000116489	CAPZA1	2.25637	0.347936	0.35341	-0.4585
	ENSG00000182087	TMEM259	2.25549	0.297604	0.35324	-0.526362
	ENSG00000197785	ATAD3A	2.2542	0.386257	0.352993	-0.413124
	ENSG00000171202	TMEM126A	2.25298	0.648938	0.352758	-0.187797
	ENSG00000184924	PTRHD1	2.24693	0.352447	0.35159	-0.452907
	ENSG00000099956	SMARCB1	2.24686	0.29502	0.351575	-0.530149
	ENSG00000255302	EID1	2.24593	0.520738	0.351397	-0.28338
	ENSG00000136045	PWP1	2.24585	0.334868	0.351382	-0.475127
	ENSG00000109534	GAR1	2.24544	0.386545	0.351302	-0.4128
	ENSG00000173207	CKS1B	2.24543	0.72931	0.351299	-0.137088
	ENSG00000230989	HSBP1	2.23811	0.370811	0.349882	-0.430847
	ENSG00000143321	HDGF	2.23689	0.32821	0.349646	-0.483848
	ENSG00000079246	XRCC5	2.23593	0.434785	0.349458	-0.361726
	ENSG00000128654	MTX2	2.23185	0.373214	0.348665	-0.428042
	ENSG00000005175	RPAP3	2.22645	0.569103	0.347613	-0.244809
	ENSG00000198836	OPA1	2.22594	0.3112	0.347514	-0.50696
	ENSG00000122965	RBM19	2.22269	0.277455	0.346879	-0.556808
	ENSG00000139168	ZCRB1	2.21786	0.422002	0.345935	-0.374685
	ENSG00000173267	SNCG	2.2135	0.613462	0.34508	-0.212212
	ENSG00000117410	ATP6V0B	2.20891	0.285252	0.344178	-0.544771
	ENSG00000081307	UBA5	2.20663	0.348946	0.343729	-0.457241
	ENSG00000204308	RNF5	2.20434	0.582066	0.343279	-0.235027
	ENSG00000142208	AKT1	2.1979	0.342546	0.342008	-0.465281
	ENSG00000179950	PUF60	2.19709	0.340304	0.341849	-0.468134
	ENSG00000133265	HSPBP1	2.19657	0.494839	0.341745	-0.305536
	ENSG00000165678	GHITM	2.19644	0.386448	0.34172	-0.412909
	ENSG00000011485	PPP5C	2.18957	0.421916	0.340359	-0.374774
	ENSG00000117143	UAP1	2.18353	0.396228	0.33916	-0.402055
	ENSG00000176619	LMNB2	2.17842	0.350305	0.338141	-0.455554
	ENSG00000018610	CXorf56	2.17782	0.185923	0.338022	-0.730666
	ENSG00000166347	CYB5A	2.17332	0.277692	0.337124	-0.556437
	ENSG00000136682	CBWD2	2.16596	0.28364	0.335651	-0.547233
	ENSG00000119335	SET	2.16542	0.406346	0.335543	-0.391104
	ENSG00000163479	SSR2	2.15905	0.324669	0.334263	-0.48856
	ENSG00000171159	C9orf16	2.15762	0.36789	0.333974	-0.434282
	ENSG00000128309	MPST	2.14911	0.229698	0.332259	-0.638843
	ENSG00000189043	NDUFA4	2.14906	0.556868	0.332249	-0.254248
	ENSG00000113272	THG1L	2.14733	0.539275	0.331899	-0.26819
	ENSG00000009844	VTA1	2.14731	0.350046	0.331894	-0.455875
	ENSG00000111247	RAD51AP1	2.14598	0.547451	0.331626	-0.261655
[truncated: 4,409 more rows]

## Sheet: Table 6
	GENEID	Expression in MCF7 single culture (RPM)		ACTB expression in MCF7 (RPM)		Expression as % of ACTB			MEFs co-culture (RPM)		MEFs mix (RPM)		FC	log2FC
[truncated: 13 more rows]

[truncated: 4 more sheets: Table 7, Table 8, Table 9, Table 10]
