# Supplementary material for: Global analysis of contact-dependent human-to-mouse intercellular mRNA and lncRNA transfer in cell culture
Source: eLife. 2023 May 30;12:e83584. doi: 10.7554/eLife.83584 (PMC10259485; doi:10.7554/eLife.83584)
Supplement: Supplementary file 1. — Table 1. The table contains the conditions of cell sorting and percentage of cell populations after antigen-based magnetic bead cell sorting. Table 2. Results from post-hoc Tukey Test following one way ANOVA from Figure 5—figure supplement 1C – Detection of tdTomato mRNA transfer from donor MBS-MEFs expressing tdTomato-β-actin fusions to WT MEFs. Table 3. Number of occurrences of EV-mRNA targeting motifs in transferred RNAs of the same RNA sets used in Figure 5—figure supplement 2. [file elife-83584-supp1.xlsx]

## Sheet: Table 1
Cell type enriched	Sample type	Number of cells	Amount of anti-CD326 microbeads added	Time of incubation
MBS-MEF	Single culture	3 x 106	100 µl in a total of 500 µl cell suspension	30 min on ice
	Mix	3 x 106
	Co-culture	2 x 106
MCF7	Single culture	3 x 106	10 µl in a total of 500 µl cell suspension	10 min on ice
	Mix	3 x 106
	Co-culture	2 x 106
Sample	% MCF71	% False positive2	% MBS-MEF3	% Un- stained4
						1 % MCF7 cells are cells in the lower right quadrant (CD326 positive, CD321 negative)
MCF7 Single culture Replicate 1	99.7	0.3	0	0		2 % “Double stained” cells, most likely false-positive stained cells
MCF7 Single culture Replicate 2	99.58	0.42	0	0		3 %MBS-MEFs cells are cells in the upper left quadrant (CD321 positive, CD326 negative)
MBS-MEF Single culture Replicate 1	0	0.04	99.84	0.12		4 % Unstained cells
MBS-MEF Single culture Replicate 1	0	0.03	99.86	0.11
MCF7 cells enriched from Mix Replicate 1	99.57	0.1	0.27	0.06
MCF7 cells enriched from Mix Replicate 2	99.57	0.21	0.17	0.05
MCF7 cells enriched from Co-culture Replicate 1	99.74	0.19	0.04	0.03
MCF7 cells enriched from Co-culture Replicate 2	99.7	0.19	0.03	0.08
MBS-MEF cells enriched from Mix Replicate 1	0	0.08	97.1	2.82
MBS-MEF cells enriched from Mix Replicate 2	0.05	0.03	97.25	2.67
MBS-MEF cells enriched from Co-culture Replicate 1	0	0.03	98.96	1.01
MBS-MEF cells enriched from Co-culture Replicate 2	0	0	98.1	1.9

## Sheet: Table 2
Donor cells
Tukey's multiple comparisons test	Mean diff.	95.00% CI of diff.	Below threshold?	Summary	Adjusted p value
3U1 vs. 3U2	-9.906	-126.0 to 106.2	No	ns	0.9999
3U1 vs. CD1	110	-2.552 to 222.5	No	ns	0.0597
3U1 vs. CD2	130.8	12.67 to 249.0	Yes	*	0.0202
3U1 vs. CD3	98.9	-12.11 to 209.9	No	ns	0.1123
3U1 vs. tdTom	97.98	-16.59 to 212.5	No	ns	0.1425
3U2 vs. CD1	119.9	3.804 to 236.0	Yes	*	0.0383
3U2 vs. CD2	140.7	19.19 to 262.3	Yes	*	0.0127
3U2 vs. CD3	108.8	-5.802 to 223.4	No	ns	0.0739
3U2 vs. tdTom	107.9	-10.18 to 225.9	No	ns	0.0957
CD1 vs. CD2	20.86	-97.31 to 139.0	No	ns	0.996
CD1 vs. CD3	-11.08	-122.1 to 99.93	No	ns	0.9997
CD1 vs. tdTom	-12	-126.6 to 102.6	No	ns	0.9997
CD2 vs. CD3	-31.94	-148.7 to 84.78	No	ns	0.9704
CD2 vs. tdTom	-32.86	-153.0 to 87.25	No	ns	0.9704
CD3 vs. tdTom	-0.9209	-114.0 to 112.2	No	ns	>0.9999
Acceptor cells and Acceptor cells in Coculture
WT vs. 3U1	-14.4	-18.06 to -10.74	Yes	****	<0.0001
WT vs. 3U2	-9.615	-13.32 to -5.914	Yes	****	<0.0001
WT vs. CD1	-5.842	-9.503 to -2.181	Yes	****	<0.0001
WT vs. CD2	-6.917	-10.46 to -3.376	Yes	****	<0.0001
WT vs. CD3	-6.733	-10.20 to -3.268	Yes	****	<0.0001
WT vs. tdTom	-12.47	-16.07 to -8.859	Yes	****	<0.0001
3U1 vs. 3U2	4.785	1.083 to 8.486	Yes	**	0.0027
3U1 vs. CD1	8.558	4.897 to 12.22	Yes	****	<0.0001
3U1 vs. CD2	7.483	3.941 to 11.02	Yes	****	<0.0001
3U1 vs. CD3	7.667	4.201 to 11.13	Yes	****	<0.0001
3U1 vs. tdTom	1.935	-1.672 to 5.541	No	ns	0.6913
3U2 vs. CD1	3.773	0.07205 to 7.475	Yes	*	0.0423
3U2 vs. CD2	2.698	-0.8851 to 6.281	No	ns	0.2825
3U2 vs. CD3	2.882	-0.6255 to 6.390	No	ns	0.1877
3U2 vs. tdTom	-2.85	-6.497 to 0.7971	No	ns	0.2402
CD1 vs. CD2	-1.075	-4.617 to 2.466	No	ns	0.9729
CD1 vs. CD3	-0.8912	-4.357 to 2.574	No	ns	0.9885
CD1 vs. tdTom	-6.623	-10.23 to -3.017	Yes	****	<0.0001
CD2 vs. CD3	0.1841	-3.155 to 3.523	No	ns	>0.9999
CD2 vs. tdTom	-5.548	-9.033 to -2.063	Yes	****	<0.0001
CD3 vs. tdTom	-5.732	-9.139 to -2.325	Yes	****	<0.0001
Mean diff: Differences between the means of two distributions
CI: Confidence interval
ns: non-significant
* adjusted p-value <0.05
** adjusted p-value <0.005
**** adjusted p-value <0.0001

## Sheet: Table 3
Reference	Motif (5’ – 3’)	Number of occurrences (number of RNAs with given motif)				Threshold p-value
		Highly transferred	Less transferred – Set 1	Less transferred – Set 2	Less transferred – Set 3
		[N* = 279]	[N* = 300]	[N* = 288]	[N* = 299]
(Batagov and Kurochkin, 2013)	ACCAGCCT	53 (44)	57 (41)	64 (51)	99 (65)	2023-10-05
(Batagov and Kurochkin, 2013)	CAGTGAGC	42 (35)	60 (48)	66 (48)	96 (60)
(Batagov and Kurochkin, 2013)	TAATCCCA	44 (28)	54 (30)	66 (37)	118 (62)
(Bolukbasi et al., 2012)	CTGCCCTCCCCGCCC	0 (0)	0 (0)	0 (0)	0 (0)
(Szostak et al., 2014)	C[TA]G[GC][AGT]G[CT]C[AT]GG[GA]	68 (53)	73 (54)	85 (63)	92 (71)	2023-10-06
* Indicates the number of input RNA sequences
